# Supplementary material for: IFPTML mapping of nanoparticle antibacterial activity vs. pathogen metabolic networks
Source: Royal Society of Chemistry journal article supplement (doi:10.1039/d0nr07588d), 2020-12-15
Supplement: d0nr07588d1.pdf [file d0nr07588d1.pdf]

## IFPTML Mapping of Nanoparticles Antibacterial Activity vs. Pathogens Metabolic Networks

Bernabé Ortega-Tenezaca<sup>1,2,3,4,5</sup> and Humberto González-Díaz<sup>3,6,7,\*</sup>

<sup>1</sup>RNASA-IMEDIR, Computer Science Faculty, University of A Coruña, 15071 A Coruña, Spain.

<sup>2</sup>Amazon State University UEA, Puyo, Pastaza, Ecuador.

<sup>3</sup> Department of Organic and Inorganic Chemistry,  
University of Basque Country UPV/EHU, 48940 Leioa, Spain.

<sup>4</sup>Biomedical Research Institute of A Coruña (INIBIC),  
University Hospital Complex of A Coruña (CHUAC), 15006 A Coruña, Spain.

<sup>5</sup>Center for Investigation on Technologies of Information and Communication (CITIC),  
University of Coruña (UDC), Campus de Elviña s/n, 15071 A Coruña, Spain.

<sup>6</sup>Basque Center for Biophysics CSIC-UPVEH,  
University of Basque Country UPV/EHU, 48940 Leioa, Spain.

<sup>7</sup>IKERBASQUE, Basque Foundation for Science, 48011 Bilbao, Biscay, Spain.

\*Corresponding author: E-mail: [humberto.gonzalezdiaz@ehu.es](mailto:humberto.gonzalezdiaz@ehu.es) (HGD)

### IFPTML modeling introduction

González-Díaz *et al.* introduced the Perturbation-Theory (PT) Machine Learning (ML) and Information Fusion (IF) approach known as the IFPTML algorithm.<sup>1</sup> The general idea is to predict the output values of the function  $f(v_{ij})_{\text{calc}}$  for the  $j^{\text{th}}$  multiple properties of the query system ( $S_i$ ) under study with a single model. In so doing, IFPTML starts with the value of a function of reference experimentally measured  $f(v_{ij})_{\text{ref}}$  for already known systems. Next, in the PT pre-processing phase we collect/calculate of the structural variables of the query system  $S_i$  and the systems of references. These structural variables are often named as molecular descriptors  $D_{ki}$  and ordered as a vector  $\mathbf{D}_{ki}$  (as in classic ML techniques). The non structural variables may be numeric variables  $V_{ki}$  (like Temperature, time, *etc.*) ordered in vectors  $\mathbf{V}_{ki}$ . In addition, they may be also sets of discrete variables  $c_j$  also ordered also as vectors  $\mathbf{c}_j$  (labels, experimental conditions, type of system, assay organisms, cell lines, technique used, method of synthesis, *etc.*). We should take into consideration that the molecular system may be a complex system composed by various sub-systems  $S_i = S_{ia} + S_{ib} + \dots + S_{iq}$ . This implies the possibility of existence of various sub-sets of vectors  $\mathbf{D}_{qki}$ ,  $\mathbf{V}_{qki}$ , and  $\mathbf{c}_{qij}$  for each  $q^{\text{th}}$  sub-system  $S_{qi}$ . Consequently, in the IF phase the IFPTML algorithm may carry out a data enrichment process by fusing the original dataset with other datasets that contain complimentary information about the system  $S_i$  as a whole and/or other parts of the system ( $S_{ia}$ ,  $S_{ib}$ ,  $\dots$ ,  $S_{iq}$ ). Subsequently, IFPTML calculate the values of the PT Operators (PTOs) used to measure the deviations or perturbations in the variables of the query system  $S_i$  with respect to all the structural and non-structural variables of the systems of reference. The more commonly used PTOs have the form of Moving Averages (MA) with general notation  $\Delta V(\mathbf{D}_{ki})_{c_j}$ . These are similar to the MAs used in Box-Jenkins ARIMA time-series models. More complex PTOs have been introduced recently for complex NP systems.<sup>2-4</sup> Last, in the ML phase the IFPTML algorithm performs the training/validation of the model with current ML techniques.

## Bacterial MNs dataset (MN-set)

The data was released by Barabasi's group as gzipped ASCII files.<sup>5</sup> Data-format is: From  $\rightarrow$  To (directed link). The information studied was previously obtained by Jeong *et al.* from the 'intermediate metabolism and bioenergetics' portions of the WIT database and used in order to try to understand the large-scale organization of metabolic networks.<sup>5</sup> According to the authors, the biochemical reactions described within the WIT database are composed of substrates and enzymes connected by directed links. For each reaction, educts and products were considered as nodes connected to the temporary educt-educt complexes and associated enzymes. Bidirectional reactions were considered separately. For a given organism with N substrates, E enzymes and R intermediate complexes the full stoichiometric interactions were compiled into an (N+E+R) X (N+E+R) matrix, generated separately for each of the different organisms. The names, abbreviations, and links for all the networks studied are: *Actinobacillus actinomycetemcomitans* = AB; *Bacillus subtilis* = BS; *Clostridium acetobutylicum* = CA; *Campylobacter jejuni* = CJ; *Chlamydia pneumoniae* = CQ; *Chlamydia trachomatis* = CT; *Deinococcus radiodurans* = DR; *Escherichia coli* = EC; *Enterococcus faecalis* = EF; *Haemophilus influenza* = HI; *Helicobacter pylori* = HP; *Mycobacterium bovis* = MB; *Mycoplasma genitalium* = MG; *Mycobacterium leprae* = ML; *Mycoplasma pneumonia* = MP; *Mycobacterium tuberculosis* = MT; *Neisseria gonorrhoeae* = NG; *Neisseria meningitidis* = NM; *Pseudomonas aeruginosa* = PA; *Porphyromonas gingivalis* = PG; *Streptococcus pneumonia* = PN; *Rhodobacter capsulatus* = RC; *Saccharomyces cerevisiae* = SC; *Streptococcus pyogenes* = ST; *Salmonella typhi* = TY; *Yersinia pestis* = YP.

### Shannon's entropy scaling of MN local structural information.

As we mentioned before the same kind of operators  $Sh_k(D_k)$  can be used for different subsystems. Firstly, we calculated the parameters  $N_{ms}$  number of metabolites (m), or  $D_{ks} = \langle L_{ins} \rangle$  average in-degree,  $D_{ks} = \langle L_{outs} \rangle$  average out-degree for all metabolites in the MN of the  $s^{th}$  organism. The calculation of these parameters was carried out with the software MI-NODES<sup>6</sup> developed by our group and verified with the software CentBin.<sup>7</sup> Next, by using **Equation 1** we also applied the same probability operator  $p(D_k)$  to the structural descriptors of the and MNs ( $D_{ks}$ ). After that we obtained the values of respective entropy  $Sh(D_{ks})$  descriptors  $Sh(N_{ms})$ ,  $Sh(L_{ins})$  and  $Sh(L_{outs})$  of MN of the  $s^{th}$  organism by using **Equation 2**. It is important to note that  $N_{ms}$ ,  $L_{ins}$ , and  $L_{outs}$  are local node centralities of the MNs.<sup>5</sup> Consequently, the entropies obtained  $Sh(N_{ms})$ ,  $Sh(L_{ins})$ , and  $Sh(L_{outs})$  are also local descriptors.<sup>6</sup> In **Table S1**, you can see also the names of the organisms, two-letter codes, and their respective values of  $Sh(N_{ms})$ ,  $Sh(L_{ins})$ , and  $Sh(L_{outs})$  for all the MNs studied. These values have been calculated in this work by the first time for this set of MNs.

**Table S1.** Shannon entropy information measures of MN<sub>s</sub> studied in this work.

| MN<br>Ns | Org.<br>Code | MNs Shannon Entropy Information Measures |                |                 |             |               |
|----------|--------------|------------------------------------------|----------------|-----------------|-------------|---------------|
|          |              | $Sh_3(N_m)$                              | $Sh_4(L_{in})$ | $Sh_5(L_{out})$ | $Sh(\pi_1)$ | $Sh_2(\pi_2)$ |
| 1        | AB           | 0.134                                    | 0.088          | 0.090           | 0.015       | 0.014         |
| 2        | BS           | 0.112                                    | 0.024          | 0.026           | 0.016       | 0.014         |
| 3        | CA           | 0.128                                    | 0.065          | 0.068           | 0.007       | 0.009         |
| 4        | CJ           | 0.134                                    | 0.091          | 0.093           | 0.01        | 0.012         |
| 5        | CQ           | 0.143                                    | 0.133          | 0.134           | 0.038       | 0.038         |
| 6        | CT           | 0.142                                    | 0.129          | 0.130           | 0.017       | 0.018         |
| 7        | DR           | 0.110                                    | 0.023          | 0.024           | 0.008       | 0.007         |
| 8        | EC           | 0.112                                    | 0.022          | 0.023           | 0.008       | 0.008         |
| 9        | EF           | 0.134                                    | 0.085          | 0.087           | 0.008       | 0.011         |
| 10       | HI           | 0.127                                    | 0.058          | 0.059           | 0.016       | 0.013         |
| 11       | HP           | 0.135                                    | 0.089          | 0.091           | 0.015       | 0.017         |
| 12       | MB           | 0.132                                    | 0.085          | 0.087           | 0.008       | 0.009         |
| 13       | MG           | 0.142                                    | 0.126          | 0.127           | 0.016       | 0.017         |

|    |    |       |       |       |       |       |
|----|----|-------|-------|-------|-------|-------|
| 14 | ML | 0.132 | 0.084 | 0.085 | 0.008 | 0.009 |
| 15 | MP | 0.144 | 0.130 | 0.130 | 0.019 | 0.02  |
| 16 | MT | 0.123 | 0.054 | 0.056 | 0.015 | 0.014 |
| 17 | NG | 0.133 | 0.082 | 0.084 | 0.008 | 0.011 |
| 18 | NM | 0.134 | 0.087 | 0.089 | 0.009 | 0.012 |
| 19 | PA | 0.115 | 0.033 | 0.035 | 0.019 | 0.016 |
| 20 | PG | 0.132 | 0.088 | 0.090 | 0.008 | 0.011 |
| 21 | PN | 0.133 | 0.081 | 0.082 | 0.008 | 0.011 |
| 22 | RC | 0.119 | 0.042 | 0.044 | 0.017 | 0.015 |
| 23 | SC | 0.125 | 0.051 | 0.053 | 0.01  | 0.011 |
| 24 | ST | 0.133 | 0.082 | 0.084 | 0.01  | 0.011 |
| 25 | TY | 0.110 | 0.020 | 0.021 | 0.007 | 0.007 |
| 26 | YP | 0.124 | 0.059 | 0.061 | 0.01  | 0.013 |

### Markov-Shannon entropy scaling of MN high-order structural information.

In any case,  $N_{ms}$ ,  $\langle L_{ins} \rangle$ , and  $\langle L_{outs} \rangle$  are local topological descriptors that only account for information of the node (metabolite in question) and the nodes directly linked to it direct precursors (educts) for the case of  $\langle L_{ins} \rangle$  and direct products (adducts) for the case of  $\langle L_{out} \rangle$ .<sup>5</sup> Consequently, we also used Shannon operators of the type  $Sh(D_k) = -p(D_k) \cdot \log p(D_k)$  to quantify higher order structural information of the MNs. However, in this particular case, the operator is not applied to the local descriptor *per se*. In this case we apply the operator to the probabilities obtained from a Markov Chain calculation. In so doing, we calculated the values of entropy  $Sh_k$  of  $k^{\text{th}}$  order for the  $s^{\text{th}}$  species. The  $Sh_k$  values measure the connectivity information in the MN of the  $s^{\text{th}}$  species for all metabolites and their neighbors (substrates or products) placed at a distance (number of reactions)  $\leq k$ . In order to calculate these indices we applied the  $Sh_k(D_k) = -p(D_k) \cdot \log p(D_k)$  operator directly to the absolute probabilities  $D_k = p_k(m,s)$ . These values are the absolute probabilities  $p_k(m,s)$  with which the  $m^{\text{th}}$  metabolite transforms into another metabolite (catabolism) and/or is the product (anabolism) of the different metabolic reactions in the MNs of the  $s^{\text{th}}$  organism. The Markov matrix  ${}^1\Pi_s$  was used to calculate  $p_k(m,s)$  values by means of a Matrix-vector multiplication operation  $\mathbf{M}^k \cdot \mathbf{v}$  involving the  $k^{\text{th}}$  natural powers  $\mathbf{M}^k$  of the original matrix  $\mathbf{M}$ . In the case of a Markov matrix this product is  $({}^1\Pi_s)^k \cdot \boldsymbol{\pi}_0$  a component of Chapman-Kolmogorov equation. We calculated only the two first powers  $({}^1\Pi_s)^1$  and  $({}^1\Pi_s)^2$  of the Markov matrix  ${}^1\Pi_s$  of each one of the  $s^{\text{th}}$  bacteria species. After that we made the products  $\boldsymbol{\pi}_{1s} = ({}^1\Pi_s)^1 \cdot \boldsymbol{\pi}_0$  and  $\boldsymbol{\pi}_{2s} = ({}^1\Pi_s)^2 \cdot \boldsymbol{\pi}_0$ . The resulting vectors  $\boldsymbol{\pi}_{1s}$  and  $\boldsymbol{\pi}_{2s}$  containing as elements the absolute probabilities  $p_1(m,s)$  and  $p_2(m,s)$  for each metabolite of the network. The values  $p_1(m,s)$  are the absolute probabilities with which the  $m^{\text{th}}$  metabolite comes directly from and/or transforms directly into another metabolite ( $k = 1$ ). The values  $p_2(m,s)$  are the absolute probabilities with which the  $m^{\text{th}}$  metabolite comes directly from and/or transforms directly into intermediate metabolites that in turn came from and/or transform into a second product ( $k = 2$ ). Finally,  $Sh_k(\boldsymbol{\pi}_1)$  and  $Sh_k(\boldsymbol{\pi}_2)$  values are calculated with the operators  $Sh_k(D_k) = -p(D_k) \cdot \log p(D_k) = Sh_k(D_k) = -p(p_k(m,s)) \cdot \log p(p_k(m,s))$  as the sum of these values of entropy for each  $m^{\text{th}}$  node (metabolite) in the  $MN_s$ , see **Equation 3**. In **Table 3**, you can see also the names of the organisms, two-letter codes, and values of  $Sh_k(\boldsymbol{\pi}_1)$  and  $Sh_k(\boldsymbol{\pi}_2)$  for all the MNs studied. These values have been calculated in this work by the first time for this set of MNs. The specific formula used to calculate these values of  $Sh(\boldsymbol{\pi}_1)$  and  $Sh_k(\boldsymbol{\pi}_2)$  of MNs is the following, please see details on the literature:<sup>48</sup>

$$S(\boldsymbol{\pi}_k) = - \sum_{m=1}^{m=mmax} p_k(m,s) \cdot \log p_k(m,s) \quad (3)$$

## IF process for NP vs. MNs datasets (W-set).

In the IF process we start with the NP-set and added the values of the MN-set to create the new working dataset (W-set). Consequently, each row of the new W-set is composed by one row (NP assay case) of the NP-set and one row (MN case) of the MN-set. The new W-set contains a total of 5327 cases (NP vs. MN cases) including all the cases labels and experimental conditions  $c_{nj}$  and  $c_{sj}$  of the original sets, see **Figure S1** section (A). The new W-set includes all the values of  $\Delta\text{Sh}(D_{kn})_{cnj}$  and  $\Delta\text{Sh}(D_{ks})_{csj}$  used to quantify the information of the input variables, see **Figure S1** section (B).

(A)

| A    | B   | C      | D              | E        | F                | G            | H           | I  | J    | K                   | L           | M  | N        | O               |               |
|------|-----|--------|----------------|----------|------------------|--------------|-------------|----|------|---------------------|-------------|----|----------|-----------------|---------------|
| 1    | Nn  | NP_KEY | cn0 = Property | vnj      | cn1 = Organism   | cn2 = Strain | cn3 = Shape | Nc | COAT | cc1 = Coating mult. | cc2 = Poly. | Ns | MRNs_KEY | cs1 = Gram(+/-) | cs2 = Pathog. |
| 2    | 1   | CdS    | IC50 (uM)      | 89.98    | Escherichia coli | K-12         | Spherical   | 16 | N/A  | None                | None        | 4  | CJ       | Gram-           | GIT           |
| 3    | 1   | CdS    | IC50 (uM)      | 89.98    | Escherichia coli | K-12         | Spherical   | 16 | N/A  | None                | None        | 6  | CT       | Gram-           | SYS           |
| 4    | 1   | CdS    | IC50 (uM)      | 89.98    | Escherichia coli | K-12         | Spherical   | 16 | N/A  | None                | None        | 8  | EC       | Gram-           | GIT           |
| 5    | 1   | CdS    | IC50 (uM)      | 89.98    | Escherichia coli | K-12         | Spherical   | 16 | N/A  | None                | None        | 8  | EC       | Gram-           | GIT           |
| 6    | 1   | CdS    | IC50 (uM)      | 89.98    | Escherichia coli | K-12         | Spherical   | 16 | N/A  | None                | None        | 8  | EC       | Gram-           | GIT           |
| 7    | 1   | CdS    | IC50 (uM)      | 89.98    | Escherichia coli | K-12         | Spherical   | 16 | N/A  | None                | None        | 8  | EC       | Gram-           | GIT           |
| 8    | 1   | CdS    | IC50 (uM)      | 89.98    | Escherichia coli | K-12         | Spherical   | 16 | N/A  | None                | None        | 8  | EC       | Gram-           | GIT           |
| 9    | 1   | CdS    | IC50 (uM)      | 89.98    | Escherichia coli | K-12         | Spherical   | 16 | N/A  | None                | None        | 8  | EC       | Gram-           | GIT           |
| 10   | 1   | CdS    | IC50 (uM)      | 89.98    | Escherichia coli | K-12         | Spherical   | 16 | N/A  | None                | None        | 8  | EC       | Gram-           | GIT           |
| 11   | 1   | CdS    | IC50 (uM)      | 89.98    | Escherichia coli | K-12         | Spherical   | 16 | N/A  | None                | None        | 8  | EC       | Gram-           | GIT           |
| 12   | 1   | CdS    | IC50 (uM)      | 89.98    | Escherichia coli | K-12         | Spherical   | 16 | N/A  | None                | None        | 9  | EF       | Gram+           | GIT           |
| 13   | 1   | CdS    | IC50 (uM)      | 89.98    | Escherichia coli | K-12         | Spherical   | 16 | N/A  | None                | None        | 9  | EF       | Gram+           | GIT           |
| 14   | 1   | CdS    | IC50 (uM)      | 89.98    | Escherichia coli | K-12         | Spherical   | 16 | N/A  | None                | None        | 10 | HI       | Gram+           | SYS           |
| 5316 | 300 | SIO2   | MIC (uM)       | 16644.47 | Escherichia coli | ATCC25922    | N/A         | 13 | DMA  | Single              | Monomer     | 20 | PG       | Gram-           | SYS           |
| 5317 | 300 | SIO2   | MIC (uM)       | 16644.47 | Escherichia coli | ATCC25922    | N/A         | 13 | DMA  | Monomer             | Monomer     | 20 | PG       | Gram-           | SYS           |
| 5318 | 300 | SIO2   | MIC (uM)       | 16644.47 | Escherichia coli | ATCC25922    | N/A         | 13 | DMA  | Single              | Monomer     | 21 | PN       | Gram+           | RES           |
| 5319 | 300 | SIO2   | MIC (uM)       | 16644.47 | Escherichia coli | ATCC25922    | N/A         | 13 | DMA  | Single              | Monomer     | 21 | PN       | Gram+           | RES           |
| 5320 | 300 | SIO2   | MIC (uM)       | 16644.47 | Escherichia coli | ATCC25922    | N/A         | 13 | DMA  | Single              | Monomer     | 21 | PN       | Gram+           | RES           |
| 5321 | 300 | SIO2   | MIC (uM)       | 16644.47 | Escherichia coli | ATCC25922    | N/A         | 13 | DMA  | Single              | Monomer     | 21 | PN       | Gram+           | RES           |
| 5322 | 300 | SIO2   | MIC (uM)       | 16644.47 | Escherichia coli | ATCC25922    | N/A         | 13 | DMA  | Single              | Monomer     | 24 | ST       | Gram+           | RES           |
| 5323 | 300 | SIO2   | MIC (uM)       | 16644.47 | Escherichia coli | ATCC25922    | N/A         | 13 | DMA  | Single              | Monomer     | 24 | ST       | Gram+           | RES           |
| 5324 | 300 | SIO2   | MIC (uM)       | 16644.47 | Escherichia coli | ATCC25922    | N/A         | 13 | DMA  | Single              | Monomer     | 24 | ST       | Gram+           | RES           |
| 5325 | 300 | SIO2   | MIC (uM)       | 16644.47 | Escherichia coli | ATCC25922    | N/A         | 13 | DMA  | Single              | Monomer     | 24 | ST       | Gram+           | RES           |
| 5326 | 300 | SIO2   | MIC (uM)       | 16644.47 | Escherichia coli | ATCC25922    | N/A         | 13 | DMA  | Single              | Monomer     | 25 | TY       | Gram+           | SYS           |
| 5327 | 300 | SIO2   | MIC (uM)       | 16644.47 | Escherichia coli | ATCC25922    | N/A         | 13 | DMA  | Single              | Monomer     | 25 | TY       | Gram+           | SYS           |
| 5328 | 300 | SIO2   | MIC (uM)       | 16644.47 | Escherichia coli | ATCC25922    | N/A         | 13 | DMA  | Single              | Monomer     | 25 | TY       | Gram+           | SYS           |

(B)

| 1    | P             | Q         | R         | S          | T   | U              | V          | W          | X          | Y            | Z             | AA           | AB          | AC          | AD           | AE             |
|------|---------------|-----------|-----------|------------|-----|----------------|------------|------------|------------|--------------|---------------|--------------|-------------|-------------|--------------|----------------|
| 1    | f(n,c,j,s)obs | f(s,j)obs | f(n,s)obs | f(n,c,s,j) | Set | f(vnj(cn0))ref | DSh1(MRNs) | DSh2(MRNs) | DSh3(Nm)cs | DSh4(Lins)cs | DSh5(Louts)cs | DSh1(AMVn)cn | DSh1(AEn)cn | DSh1(APn)cn | DSh1(APSn)cn | DDSh1(t,1c,2c) |
| 2    | 0             | 1         | 1         | 0          | t   | 0.111          | -0.0020    | 0.0000     | 0.1224     | 0.0792       | 0.0808        | -0.1465      | -0.1067     | -0.1477     | -0.1302      | -0.0004982     |
| 3    | 0             | 1         | 1         | 0          | v   | 0.111          | 0.0046     | 0.0056     | 0.1297     | 0.1169       | 0.1177        | -0.1465      | -0.1067     | -0.1477     | -0.1302      | -0.0004982     |
| 4    | 1             | 1         | 1         | 1          | t   | 0.111          | -0.0040    | -0.0040    | 0.1005     | 0.0100       | 0.0109        | -0.1465      | -0.1067     | -0.1477     | -0.1302      | -0.0004982     |
| 5    | 1             | 1         | 1         | 1          | t   | 0.111          | -0.0040    | -0.0040    | 0.1005     | 0.0100       | 0.0109        | -0.1465      | -0.1067     | -0.1477     | -0.1302      | -0.0004982     |
| 6    | 1             | 1         | 1         | 1          | v   | 0.111          | -0.0040    | -0.0040    | 0.1005     | 0.0100       | 0.0109        | -0.1465      | -0.1067     | -0.1477     | -0.1302      | -0.0004982     |
| 7    | 1             | 1         | 1         | 1          | v   | 0.111          | -0.0040    | -0.0040    | 0.1005     | 0.0100       | 0.0109        | -0.1465      | -0.1067     | -0.1477     | -0.1302      | -0.0004982     |
| 8    | 1             | 1         | 1         | 1          | t   | 0.111          | -0.0040    | -0.0040    | 0.1005     | 0.0100       | 0.0109        | -0.1465      | -0.1067     | -0.1477     | -0.1302      | -0.0004982     |
| 9    | 1             | 1         | 1         | 1          | v   | 0.111          | -0.0040    | -0.0040    | 0.1005     | 0.0100       | 0.0109        | -0.1465      | -0.1067     | -0.1477     | -0.1302      | -0.0004982     |
| 10   | 1             | 1         | 1         | 1          | t   | 0.111          | -0.0040    | -0.0040    | 0.1005     | 0.0100       | 0.0109        | -0.1465      | -0.1067     | -0.1477     | -0.1302      | -0.0004982     |
| 11   | 1             | 1         | 1         | 1          | v   | 0.111          | -0.0040    | -0.0040    | 0.1005     | 0.0100       | 0.0109        | -0.1465      | -0.1067     | -0.1477     | -0.1302      | -0.0004982     |
| 12   | 0             | 1         | 1         | 0          | t   | 0.111          | -0.0040    | -0.0010    | 0.1221     | 0.0734       | 0.0749        | -0.1465      | -0.1067     | -0.1477     | -0.1302      | -0.0004982     |
| 13   | 0             | 1         | 1         | 0          | v   | 0.111          | -0.0040    | -0.0010    | 0.1221     | 0.0734       | 0.0749        | -0.1465      | -0.1067     | -0.1477     | -0.1302      | -0.0004982     |
| 14   | 0             | 1         | 1         | 0          | t   | 0.111          | 0.0036     | 0.0006     | 0.1143     | 0.0458       | 0.0470        | -0.1465      | -0.1067     | -0.1477     | -0.1302      | -0.0004982     |
| 5316 | 0             | 1         | 0         | 0          | v   | 0.585          | -0.0044    | -0.0014    | 0.1197     | 0.0759       | 0.0780        | -0.1484      | -0.1286     | -0.1136     | -0.1504      | 0.0033057      |
| 5317 | 0             | 1         | 0         | 0          | t   | 0.585          | -0.0044    | -0.0014    | 0.1197     | 0.0759       | 0.0780        | -0.1484      | -0.1286     | -0.1136     | -0.1504      | 0.0033057      |
| 5318 | 0             | 1         | 0         | 0          | t   | 0.585          | -0.0007    | 0.0023     | 0.1239     | 0.0719       | 0.0737        | -0.1484      | -0.1286     | -0.1136     | -0.1504      | 0.0033057      |
| 5319 | 0             | 1         | 0         | 0          | v   | 0.585          | -0.0007    | 0.0023     | 0.1239     | 0.0719       | 0.0737        | -0.1484      | -0.1286     | -0.1136     | -0.1504      | 0.0033057      |
| 5320 | 0             | 1         | 0         | 0          | t   | 0.585          | -0.0007    | 0.0023     | 0.1239     | 0.0719       | 0.0737        | -0.1484      | -0.1286     | -0.1136     | -0.1504      | 0.0033057      |
| 5321 | 0             | 1         | 0         | 0          | v   | 0.585          | -0.0007    | 0.0023     | 0.1239     | 0.0719       | 0.0737        | -0.1484      | -0.1286     | -0.1136     | -0.1504      | 0.0033057      |
| 5322 | 0             | 1         | 0         | 0          | v   | 0.585          | 0.0013     | 0.0023     | 0.1246     | 0.0736       | 0.0749        | -0.1484      | -0.1286     | -0.1136     | -0.1504      | 0.0033057      |
| 5323 | 0             | 1         | 0         | 0          | t   | 0.585          | 0.0013     | 0.0023     | 0.1246     | 0.0736       | 0.0749        | -0.1484      | -0.1286     | -0.1136     | -0.1504      | 0.0033057      |
| 5324 | 0             | 1         | 0         | 0          | t   | 0.585          | 0.0013     | 0.0023     | 0.1246     | 0.0736       | 0.0749        | -0.1484      | -0.1286     | -0.1136     | -0.1504      | 0.0033057      |
| 5325 | 0             | 1         | 0         | 0          | v   | 0.585          | 0.0013     | 0.0023     | 0.1246     | 0.0736       | 0.0749        | -0.1484      | -0.1286     | -0.1136     | -0.1504      | 0.0033057      |
| 5326 | 0             | 1         | 0         | 0          | t   | 0.585          | -0.0005    | -0.0005    | 0.1026     | 0.0125       | 0.0135        | -0.1484      | -0.1286     | -0.1136     | -0.1504      | 0.0033057      |
| 5327 | 0             | 1         | 0         | 0          | t   | 0.585          | -0.0005    | -0.0005    | 0.1026     | 0.0125       | 0.0135        | -0.1484      | -0.1286     | -0.1136     | -0.1504      | 0.0033057      |
| 5328 | 0             | 1         | 0         | 0          | v   | 0.585          | -0.0005    | -0.0005    | 0.1026     | 0.0125       | 0.0135        | -0.1484      | -0.1286     | -0.1136     | -0.1504      | 0.0033057      |

**Figure S1.** IF of labels and conditions (A) and inputs of NP vs. MN data sets (B)

The W-set also includes the functions  $f(n,j,s)$ ,  $f(s,j)$ , and  $f(n,s)$ ,  $f(n,c,s,j)$ . The first function gets the values  $f(n,j,s) = 1$  when the  $n^{\text{th}}$  NP give a positive result in the  $j^{\text{th}}$  antibacterial activity assay against the  $s^{\text{th}}$  bacteria specie. The second function gets the values  $f(s,j) = 1$  when the  $s^{\text{th}}$  bacteria specie was considered as a Human pathogen in the  $j^{\text{th}}$  biological tests. Last, the function  $f(n,s) = 1$  when the  $n^{\text{th}}$  NP assay and the  $s^{\text{th}}$  MN refers to the same  $s^{\text{th}}$  bacteria specie. All in all,  $f(n,c,s,j) = 1$  when  $f(n,j,s) = f(s,j) = f(n,s) = 1$ , meaning that all the previous conditions appear at the same time  $f(n,c,s,j) = f(n,j,s) \cdot f(s,j) \cdot f(n,s)$ . Otherwise,  $f(n,c,s,j) = 0$  when  $f(n,j,s) = 0$ ,  $f(s,j) = 0$ , and/or  $f(n,s) = 0$ , meaning that at least one of the previous conditions fail. All the cases of the W-set were assigned at random to training (set = t) or validation (set = v) series using the function  $f(\text{set}) = 1$  (set = t) or  $= 0$  (set = v). The t-set was used training the IFPTML model and v-set to validate it. In **Table S2** we summarize the different partitions of the dataset as result of the application of the respective functions.

**Table S2.** Data pre-processing functions and cases distribution

| Function           | Value | Description                                                                                                                                                                                          | n    |
|--------------------|-------|------------------------------------------------------------------------------------------------------------------------------------------------------------------------------------------------------|------|
| $f(s,j)_{obs}$     | 1     | MN $s^{th}$ specie is a Human pathogen                                                                                                                                                               | 5092 |
|                    | 0     | MN $s^{th}$ specie is not a Human pathogen                                                                                                                                                           | 235  |
| $f(n,j,s)_{obs}$   | 1     | Positive outcome for $n^{th}$ NP in $j^{th}$ assay with $s^{th}$ org species                                                                                                                         | 2519 |
|                    | 0     | Negative outcome for $n^{th}$ NP in $j^{th}$ assay with $s^{th}$ org species                                                                                                                         | 2808 |
| $f(n,s)_{obs}$     | 1     | NP $n^{th}$ specie = MN $s^{th}$ specie                                                                                                                                                              | 904  |
|                    | 0     | NP $n^{th}$ specie $\neq$ MN $s^{th}$ specie                                                                                                                                                         | 4423 |
| $f(n,c,j,s)_{obs}$ | 1     | Positive outcome for $n^{th}$ NP in $j^{th}$ assay with $s^{th}$ org species which is the same than MN $s^{th}$ species<br>$f(n,c,j,s)_{obs} = f(s,j)_{obs} \cdot f(n,j,s)_{obs} \cdot f(n,s)_{obs}$ | 563  |
|                    | 0     | Negative outcome for $n^{th}$ NP in $j^{th}$ assay with $s^{th}$ org species which is the same than MN $s^{th}$ species<br>$f(n,c,j,s)_{obs} = f(s,j)_{obs} \cdot f(n,j,s)_{obs} \cdot f(n,s)_{obs}$ | 4764 |
| $f(set)_{obs}$     | 1     | Cases used to train the model (set = t)                                                                                                                                                              | 3213 |
|                    | 0     | Cases used to validate the model (set = v)                                                                                                                                                           | 2114 |
| Total              | -     | All cases in data set                                                                                                                                                                                | 5327 |

### Pre-processing of the observed values of NP biological parameters.

The parameters  $v_{nj}(c_{n0})$  are used to quantify the biological activity of the  $n^{th}$  NP-system on the  $j^{th}$  assay with conditions encoded by the vector  $\mathbf{c}_{nj} = (c_{n0}, c_{n1}, \dots, c_{nmax})$ . This variable refers to the numerical values  $v_{nj}$  of different experimental parameters with name  $c_{n0}$  ( $IC_{50}(\mu M)$ ,  $MIC(\mu M)$ , *etc.*), see **Table 5**. However, as we have multiple  $c_{n0}$  parameters with different units and errors we decided to transform all the  $v_{nj}(c_{n0})$  values into the Boolean function  $f(n,s,j)_{obs} = 1$  or  $0$ . This output variable  $f(n,s,j)_{obs}$  is the objective function to be fitted by the model. In order to define this function we used the original values of biological activity  $v_{nj}(c_{n0})$  and the parameters  $cutoff(c_{n0})$  and desirability  $d(c_{n0})$ . The parameter  $cutoff(c_{n0})$  is a threshold value used to delimit NP with strong *vs.* weak effects. The parameter desirability  $d(c_{n0})$  get the value  $d(c_{n0}) = 1$  when the parameters  $c_{n0}$  need to be minimized to obtain an optimal NP, *i.e.*  $IC_{50}(\mu M)$  or  $d(c_{n0}) = 0$  otherwise. With these parameters we obtained the values of the  $f(n,s,j)$  function as follow:  $f(n,s,j)_{obs} = 1$  when  $v_{nj}(c_{n0}) > cutoff(c_{n0})$  and desirability  $d(c_{n0}) = 1$ . The value is also  $f(n,s,j)_{obs} = 1$  when  $v_{nj}(c_{n0}) < cutoff(c_{n0})$  and desirability  $d(c_{n0}) = -1$ ,  $f(n,s,j)_{obs} = 0$  otherwise. The value  $f(n,s,j)_{obs} = 1$  point to an strong desired effect of the NP over the bacteria specie or strain while  $f(n,s,j)_{obs} = 0$  indicates a weak effect with respect to the cutoff used.<sup>10</sup> Once we get the values of  $f(n,s,j)_{obs}$  for all the NP-set we counted on the total number of cases  $n(f(v_{ij})=1/)$  and the total number of positive cases  $n(f(v_{ij})=1/c_{n0})$  for each property ( $c_{n0}$ ). With these parameters we calculated the values of the function of reference  $f(c_{n0})_{ref} = n(f(v_{ij})=1/)/n(f(v_{ij})=1/c_{n0})$ . This definition allows us to interpret the function of reference as the prior probability  $f(c_{n0})_{ref} = p(f(v_{ij})=1/c_{n0})_{ref}$  for one NP to have good values of the different parameters  $c_{n0}$ . In **Table 5** we depict the values of the reference function, cutoff, and other parameters used for the different biological properties.



## IFPTML models training and validation.

We used the software SOFT.PTML to develop alternative IFPTML models for the purpose of comparison.<sup>8</sup> SOFT.PTML has a user-friendly interface specially designed for the development of IFPTML models. The **Figure S2** shows SOFT.PTML software interface with the parameters/inputs of the present IFPTML NP predictive model.

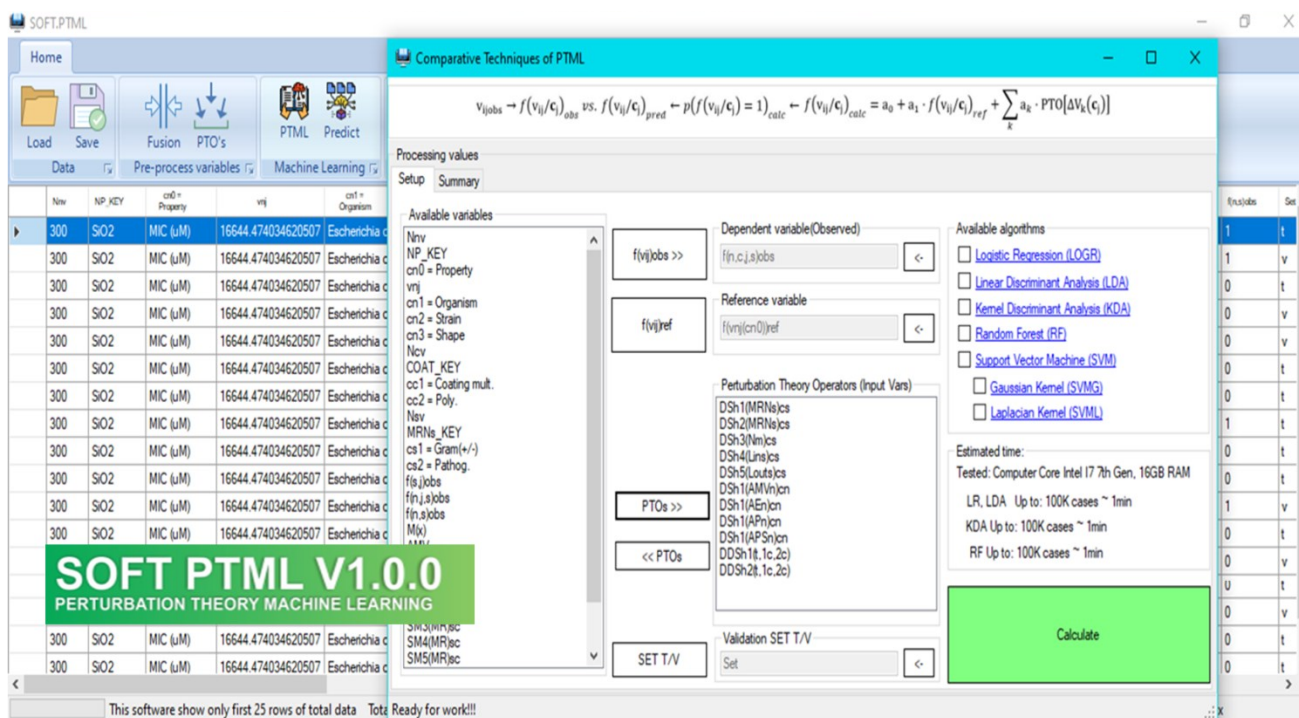

**Figure S2.** SOFT.PTML software interface with the input parameters for IFPTML NP predictive model

## PTML NP vs. MNs model

As we mentioned in the introduction ML techniques are being applied to solve multiple practical problems in Nanotechnology.<sup>9-14</sup> In this work we focused on the use of IFPTML algorithm to map NP preclinical assays vs. MNs structure. During pre-processing phase we were able to build up a W-set NP vs. MNs cases involving multiple assay conditions. After calculating the PTOs (input variables) a re-scaling the objective function we decided fit different IFPTML models. In first instance, we used the software STATISTICA 6.0 to run the LDA algorithm in order to seek the IFPTML preliminary model.<sup>15</sup> We used FSW procedure as variable selection strategy for an automatic selection of the input features. The best PTML-LDA model found with FSW presents 8 input variables. The quality of all the IFPTML models found was assessed calculating Sn, Sp, Ac,  $\chi^2$ , and the  $p$ -level.<sup>15</sup> All these parameters were in the correct ranges reported in the literature for ML classification techniques. The Sn, Sp, and Ac are >75% in fact, they are in the range 79-92% overall (including training and validation series). However, we should reconsider using this model in practice. The model does not include some important factors such as time of assay, NP coating agent, etc. These are factors of the major importance in the experiments and we should not omit them. Changing the number of variables in FSW input parameters was not an adequate solution to improve the model. Increasing the number of variables includes other variables that are co-linear and contain the same information that the variables already on the model. According to Occam's razor heuristic rule (principle of parsimony) we should use the minimal but still relevant features to solve the problem (no more no less).<sup>16</sup> In the inability of FSW strategy to recognize time and coating agents as relevant factor is not probably a fail of the technique *per se*. It is probable due to the low variability of the experimental data at our disposition at the moment of creation of the NP-set. In fact, in data pre-processing stage we detected low variance values of the PTOs of the missing variables  $\Delta Sh(D_{1c})$ ,  $\Delta Sh(D_{2c})$ , and  $\Delta Sh(t)$ . Consequently, EGS

heuristic was used to retrain the LDA model including both features selected by FSW and relevant missing features. First we decided to zip all this information into a modified type of PTOs based on multiple Shannon's entropy information measures  $\Delta\text{Sh}(D_{1c}, D_{2c}, t)$ . See details on the use of different types of PTOs in the literature.<sup>2,4</sup> In **Table 6**, we depict a summary of the statistical parameters for new IFPTML-LDA model obtained using EGS heuristic. This model includes all the important variables and has also similar to slightly better values of the control parameters Sn, Sp, Ac,  $\chi^2$ , and the  $p$ -level.<sup>17, 18</sup> The equation of this last IFPTML-LDA linear model found using EGS heuristics on the software STATISTICA is the following, **Equation s1**:

$$\begin{aligned} \text{LDA: } f(n, c, j, s)_{calc} = & 49.6937 + 1.4522 \cdot f(c_{n0})_{ref} + 327.9605 \cdot \Delta\text{Sh}(AMVn)_{cn_j} \quad (s1) \\ & + 23.9501 \cdot \Delta\text{Sh}(APSn)_{cn_j} + 272.3486 \cdot \Delta\Delta\text{Sh}(t, c1, c2)_{cn_j} \\ & + 151.9395 \cdot \Delta\text{Sh}(\boldsymbol{\pi}_1)_{cs_j} + 123.5307 \cdot \Delta\text{Sh}(\boldsymbol{\pi}_2)_{cs_j} \\ & - 252.1523 \cdot \Delta\text{Sh}(L_{in})_{cs_j} + 188.5416 \cdot \Delta\text{Sh}(L_{out})_{cs_j} \\ \\ N_{train} = & 3213 \quad \chi^2 = 12188.263 \quad p\text{-level} < 0.05 \end{aligned}$$

Next, we used the software SOFT.PTML to develop alternative IFPTML models for the purpose of comparison.<sup>8</sup> With this second software, specifically designed for us to run IFPTML experiments, we used the ML techniques LOGR, RF, and SVM. These ML techniques have been widely used in Chemoinformatics and Nanotechnology for classification purposes.<sup>9, 11, 19, 20</sup> In **Table S3** we summarize the results of the different IFPTML models found. The IFPTML-LOGR model found is similar to the IFPTML-LDA model reported above. Both models are linear with the same variables. However, the models have different coefficients of the variables in terms of magnitude. It is interesting that the sign of the coefficients is the same for all the variables except the pair  $\Delta\text{Sh}(L_{ins})$  vs.  $\Delta\text{Sh}(L_{outs})$ . In this cases both variables interchanges the signs of their coefficients in PTML-LOGR model with respect to PTML-LDA model. This can be explained taking into consideration that for networks certain Anabolism-Catabolism balance ( $L_{ins} \approx L_{outs}$ ) the terms may present certain degree of collinearity. As a consequence the signs of  $\Delta\text{Sh}(L_{ins})$  and  $\Delta\text{Sh}(L_{outs})$  by be interchangeable until certain extension. In any case, PTML-LOGR model has Ac = 97-96% in training/validation series vs. Ac = 81-82% of the PTML-LDA model. We can conclude that the PTML-LOGR model is notably more accurate (15% more) than the PTML-LDA model. In this sense, we decided to select the PTML-LOGR model as our best PTML linear model. In addition, we can see in **Table 6** that the PTML-RF non-linear model outperformed all the linear models with values of Sn, Sp, and Ac in the range 96-99.5%. This make this model the better option for predictive studies but its non-linear character makes it a bit more complex. Last, we can note that the SVM showed very high values of Sn, Sp, and Ac = 100% in training but resulted to be totally unbalanced (Sp = 100 and Sn = 0%) in validation series. As a result we discarded the IFPTML-SVM model for practical use. All in all, the present results demonstrate that it is possible to seek IFPTML predictive models for NP vs. bacteria with different MNs. These results also validate the use of SOFT.PTML to construct this type of model.

**Table S3.** IFPTML models results summary

| Soft. | Algo.      | Observed class.        | Predicted classification |      |                         |                         |
|-------|------------|------------------------|--------------------------|------|-------------------------|-------------------------|
|       |            |                        | Stat.                    | (%)  | $f(n,c,j,s)_{pred} = 0$ | $f(n,c,j,s)_{pred} = 1$ |
| STAT  | LDA        | Training               |                          |      |                         |                         |
|       |            | $f(n,c,j,s)_{obs} = 0$ | Sp                       | 79.9 | 2853                    | 717                     |
|       |            | $f(n,c,j,s)_{obs} = 1$ | Sn                       | 90.1 | 42                      | 384                     |
|       | Total      | Ac                     | 81                       |      |                         |                         |
|       | Validation |                        |                          |      |                         |                         |
|       |            | $f(n,c,j,s)_{obs} = 0$ | Sp                       | 81   | 967                     | 227                     |

|      |        |                        |       |       |                         |                         |
|------|--------|------------------------|-------|-------|-------------------------|-------------------------|
|      |        | $f(n,c,j,s)_{obs} = 1$ | Sn    | 92    | 11                      | 126                     |
|      |        | Total                  | Ac    | 82.1  |                         |                         |
|      | LDA    | $f(n,c,j,s)_{obs} = 0$ | Sp    | 81.1  | 2896                    | 674                     |
|      | EGS    | $f(n,c,j,s)_{obs} = 1$ | Sn    | 90.1  | 42                      | 384                     |
|      | 8 vars | Total                  | Ac    | 82.1  |                         |                         |
|      |        | Validation             | Stat. | (%)   | $f(n,c,j,s)_{pred} = 0$ | $f(n,c,j,s)_{pred} = 1$ |
|      |        | $f(n,c,j,s)_{obs} = 0$ | Sp    | 81.7  | 976                     | 218                     |
|      |        | $f(n,c,j,s)_{obs} = 1$ | Sn    | 92    | 11                      | 126                     |
|      |        | Total                  | Ac    | 82.8  |                         |                         |
| PTML | LOGR   | Training               | Stat. | (%)   | $f(n,c,j,s)_{pred} = 0$ | $f(n,c,j,s)_{pred} = 1$ |
| SOFT | EGS    | $f(n,c,j,s)_{obs} = 0$ | Sp    | 99.3  | 2905                    | 21                      |
|      | 8 vars | $f(n,c,j,s)_{obs} = 1$ | Sn    | 79.4  | 59                      | 228                     |
|      |        | Total                  | Ac    | 97.5  |                         |                         |
|      |        | Validation             | Stat. | (%)   | $f(n,c,j,s)_{pred} = 0$ | $f(n,c,j,s)_{pred} = 1$ |
|      |        | $f(n,c,j,s)_{obs} = 0$ | Sp    | 99.3  | 1826                    | 12                      |
|      |        | $f(n,c,j,s)_{obs} = 1$ | Sn    | 80.8  | 53                      | 223                     |
|      |        | Total                  | Ac    | 96.9  |                         |                         |
|      | RF     | Training               | Stat. | (%)   | $f(n,c,j,s)_{pred} = 0$ | $f(n,c,j,s)_{pred} = 1$ |
|      | EGS    | $f(n,c,j,s)_{obs} = 0$ | Sp    | 99.5  | 2912                    | 14                      |
|      | 8 vars | $f(n,c,j,s)_{obs} = 1$ | Sn    | 96.9  | 9                       | 278                     |
|      |        | Total                  | Ac    | 99.3  |                         |                         |
|      |        | Validation             | Stat. | (%)   | $f(n,c,j,s)_{pred} = 0$ | $f(n,c,j,s)_{pred} = 1$ |
|      |        | $f(n,c,j,s)_{obs} = 0$ | Sp    | 99.5  | 1829                    | 9                       |
|      |        | $f(n,c,j,s)_{obs} = 1$ | Sn    | 98.6  | 4                       | 272                     |
|      |        | Total                  | Ac    | 99.4  |                         |                         |
|      | SVM    | Training               | Stat. | (%)   | $f(n,c,j,s)_{pred} = 0$ | $f(n,c,j,s)_{pred} = 1$ |
|      | EGS    | $f(n,c,j,s)_{obs} = 0$ | Sp    | 100.0 | 2926                    | 0                       |
|      | 8 vars | $f(n,c,j,s)_{obs} = 1$ | Sn    | 100.0 | 0                       | 287                     |
|      |        | Total                  | Ac    | 100.0 |                         |                         |
|      |        | Validation             | Stat. | (%)   | $f(n,c,j,s)_{pred} = 0$ | $f(n,c,j,s)_{pred} = 1$ |
|      |        | $f(n,c,j,s)_{obs} = 0$ | Sp    | 100.0 | 1838                    | 0                       |
|      |        | $f(n,c,j,s)_{obs} = 1$ | Sn    | 0.0   | 276                     | 0                       |
|      |        | Total                  | Ac    | 86.9  |                         |                         |

### PTML study of NP-Bacteria resistance vs. MN metabolic topology

The study of the MNs of those bacteria with high resistance to NPs action may give clues for the future design of new NP with specific antibacterial activity. As we mentioned before, the values of  $p(f(n,c,j,s)=1)_{pred}$  are the probabilities with which a given NP is predicted to be active against the bacteria with a given MN<sub>s</sub>. We can interpret these probabilities as a measure of bacterial susceptibility to NPs.



Consequently, from the point of view of the MNs those bacteria with low values of  $p(f(n,c,j,s)=1)_{\text{pred}}$  are predicted to be very resistant to the action of the  $n^{\text{th}}$  NP in the  $j^{\text{th}}$  assay. Accordingly, a low average value  $p(f(n,c,j,s)=1)_{\text{avg}} = \langle p(f(n,c,j,s)=1)_{\text{pred}} \rangle$  (average of all  $p(f(n,c,j,s)=1)_{\text{pred}}$  values) for the  $s^{\text{th}}$  bacteria *vs.* the same NP in different assays indicates that this specie should be very resistant to this NP in particular regardless the assay selected. In order to compare the structure of the MNs of different bacteria *vs.* the predicted  $p(f(n,c,j,s)=1)_{\text{avg}}$  we could use a single numerical parameter of MN metabolic structure (network topology). In this work we used 3 numerical parameters related to MNs metabolic structure,  $N_{\text{ms}}$ ,  $\langle L_{\text{ins}} \rangle$ , and  $\langle L_{\text{outs}} \rangle$ . We used these parameters to calculate a unique parameter that fusion all this information. We are going to call this parameter as the Anabolism-Catabolism Unbalance ( $ACU_s$ ) index of MN<sub>s</sub> of the  $s^{\text{th}}$  bacteria specie (see **Equation 3**).

$$ACU_s = \alpha \cdot \frac{(\langle L_{\text{ins}} \rangle - \langle L_{\text{outs}} \rangle)}{N_{\text{ms}}} \quad (3)$$

The parameters used to construct ACUs have the following structural meaning in terms of graph theory. The parameter  $N_{\text{ms}}$  = number of nodes,  $\langle L_{\text{ins}} \rangle$  = average in-degree, and  $\langle L_{\text{outs}} \rangle$  = average out-degree of all nodes in the graph. The number of nodes coincides with the number of metabolites ( $N_{\text{ms}}$ ) in the MN of the  $s^{\text{th}}$  organism. The index  $L_{\text{in}}$  is used to count all the arrows that reach (get in) a node into a complex network. In the context of MNs the  $L_{\text{in}}$  is the number of metabolites that are precursors (educts) of the query metabolite (m). By analogy,  $L_{\text{out}}$  is the number of metabolites that are products (adducts) of a metabolic reaction with the query metabolite as precursor.<sup>5, 21, 22</sup> That is way we used  $\langle L_{\text{ins}} \rangle$  as a measure of the Anabolism and  $\langle L_{\text{outs}} \rangle$  as a measured of the Catabolism of the MNs of this bacteria. Consequently, we can use the difference ( $\langle L_{\text{outs}} \rangle - \langle L_{\text{ins}} \rangle$ ) as a measure of the unbalance of the anabolic *vs.* the catabolic metabolism in the network. We have not found a direct reference to this specific parameter in the literature. However, similar parameters based on differences between  $L_{\text{out}}$  and  $L_{\text{in}}$  have been used before to measure the unbalance of the flow in networks.<sup>23</sup> The number  $\alpha = 10$  is used as scaling factor here to transform  $ACU_s$  into the same scale than  $\langle p(f(n,c,j,s)=1)_{\text{pred}} \rangle$  for further comparison. In **Table S4** we depict the values of  $p(f(n,c,s,j)=1)_{\text{avg}}$ ,  $N_{\text{ms}}$ ,  $\langle L_{\text{outs}} \rangle$ ,  $\langle L_{\text{ins}} \rangle$ , and AUCs of all the MNs studied along with other biologically relevant information. Almost all the human pathogenic bacteria studied presented  $p(f(n,c,s,j)=1)_{\text{avg}} < 0.5$  meaning that they are resistant to the action of NP on average. The specie *Mycoplasma pneumonia* (MP) predicted to be the more resistant ( $p(f(n,c,j,s) < 0.5)$ ) to NP. MP is the unique specie in the W-set with ACUs  $< 0.5$ . MP is a Gram negative (G-) bacterium causing respiratory system (RES) infections. The bacterium *Helicobacter pylori* (HP) is predicted to be the more resistant ( $p(f(n,c,j,s) < 0.5)$ ) to NP action and counts among those with ACUs  $> 0.5$ , the majority of bacteria on this dataset. HP is a Gram negative (G-) bacteria causing systemic (SYS) infection. These values should be taken with caution remember that we are comparing average values and one species and/or strain may be susceptible to a particular NP in one specific assay. Consequently, we recommend using them only as a general guide to discover trends on the behavior of NP *vs.* different bacteria species. In this sense, a closer inspection of the predictions for all pairs NP *vs.* MNs should give a more accurate picture.

**Table S4.** PTML NP prediction results *vs.* MNs topology

| Bacteria Biological Information <sup>a</sup> |      |                       |        |         | Numerical parameters           |                 |                                  |                                   |             |
|----------------------------------------------|------|-----------------------|--------|---------|--------------------------------|-----------------|----------------------------------|-----------------------------------|-------------|
| MN                                           | Org. | H.P.                  | G(+/-) | Pathog. | PTML                           | MN Topology     |                                  |                                   |             |
| $N_s$                                        | Code | $f(s,j)_{\text{obs}}$ | $cs_1$ | $cs_2$  | $p(f(n,c,s,j)=1)_{\text{avg}}$ | $N_{\text{ms}}$ | $\langle L_{\text{ins}} \rangle$ | $\langle L_{\text{outs}} \rangle$ | $ACU_s$     |
| 1                                            | AB   | 1                     | G-     | GIT     | 0.20                           | 395             | 1202                             | 1166                              | 0.91        |
| 4                                            | CJ   | 1                     | G-     | GIT     | 0.06                           | 380             | 1142                             | 1115                              | 0.71        |
| 8                                            | EC   | 1                     | G-     | GIT     | 0.55                           | 778             | 2904                             | 2859                              | 0.58        |
| 11                                           | HP   | 1                     | G-     | GIT     | <b>0.07</b>                    | 375             | 1181                             | 1144                              | <b>0.99</b> |
| 9                                            | EF   | 1                     | G+     | GIT     | 0.05                           | 386             | 1244                             | 1218                              | 0.67        |
| 15                                           | MP   | 1                     | G-     | RES     | <b>0.00</b>                    | 178             | 470                              | 466                               | <b>0.22</b> |

|    |    |   |    |     |      |     |      |      |      |
|----|----|---|----|-----|------|-----|------|------|------|
| 16 | MT | 1 | G- | RES | 0.12 | 587 | 1862 | 1823 | 0.66 |
| 12 | MB | 1 | G+ | RES | 0.02 | 429 | 1247 | 1221 | 0.61 |
| 21 | PN | 1 | G+ | RES | 0.09 | 416 | 1331 | 1298 | 0.79 |
| 24 | ST | 1 | G+ | RES | 0.13 | 403 | 1300 | 1277 | 0.57 |
| 6  | CT | 1 | G- | SYS | 0.03 | 215 | 479  | 462  | 0.79 |
| 10 | HI | 1 | G- | SYS | 0.44 | 526 | 1773 | 1746 | 0.51 |
| 17 | NG | 1 | G- | SYS | 0.02 | 406 | 1298 | 1270 | 0.69 |
| 18 | NM | 1 | G- | SYS | 0.02 | 381 | 1212 | 1181 | 0.81 |
| 19 | PA | 1 | G- | SYS | 0.90 | 734 | 2453 | 2398 | 0.75 |
| 20 | PG | 1 | G- | SYS | 0.04 | 424 | 1192 | 1156 | 0.85 |
| 14 | ML | 1 | G+ | SYS | 0.03 | 422 | 1271 | 1244 | 0.64 |
| 25 | TY | 1 | G+ | SYS | 0.70 | 819 | 3008 | 2951 | 0.70 |
| 23 | SC | 0 | G- | NO  | 0.20 | 561 | 1934 | 1889 | 0.80 |
| 2  | BS | 0 | G+ | NO  | 0.80 | 785 | 2794 | 2741 | 0.68 |
| 3  | CA | 0 | G+ | NO  | 0.08 | 494 | 1624 | 1578 | 0.93 |

<sup>a</sup> MN Ns = MN Numerical label. Org. Code = Organism Two-Letters code (see full list in Materials and Methods). H.P. = Human pathogen bacteria ( $f(s,j)_{obs} = 1$ ). G(+/-) = Gram staining ( $c_{s1}$ ), G+ = Gram positive, G- = Gram negative. Pathog. = Pathogenicity ( $c_{s2}$ ), SYS = Systemic, GIT = Gastro-Intestinal Track, RES = Respiratory System, NO = Non pathogenic bacteria.

In order to give this closer picture we decided to compare both the observed and calculated values of probability  $p(f(n,c,j,s)=1)_{ns}$ . The  $p(f(n,c,j,s)=1)_{ns}$  are the values of probability of success of the  $n^{th}$  NP in all assays with using the same  $s^{th}$  MN of a given bacteria specie. This study shall give us also a closer view of the predictive power of IFPTML-LOGR and IFPTML-RF models. The values of  $p(f(n,c,j,s)=1)_{ns}$  are essentially different from  $p(f(n,c,j,s)=1)_{avg}$ . The values  $p(f(n,c,j,s)=1)_{avg}$  are the average value of the predicted probabilities for wide groups of bacteria species. The values of  $p(f(n,c,j,s)=1)_{ns}$  are both observed and predicted values for  $NP_n$  vs.  $MN_s$  specific pairs. We can get this parameter as  $p(f(n,c,j,s)=1)_{ns} = n(f(n,c,s,j)=1/n,s)/n(n,s)$ . In this formula  $n(f(n,c,s,j)=1/n,s)$  is the number of success cases. The parameter  $n(n,s)$  is the total number of cases given that the pair  $NP_n$  vs.  $MN_s$  have been used on the preclinical assays. We obtained both the observed and the calculated versions of  $p(f(n,c,j,s)=1)_{ns}$  using the two IFPTML models. The full table appears on the Supporting Information file SI00.xlsx, ACU sheet. Notably, both models PTML-LOGR and PTML-RF are very accurate to discard near to 100% of cases of negative results for  $NP_n$  vs.  $MN_s$  pairs (cases in bold face). However, PTML-RF is above 15% better than PTML-LOGR indentifying experimentally confirmed positive cases for  $NP_n$  vs.  $MN_s$  pairs (fails are bold face and red color highlighted).

## ACKNOWLEDGMENTS

G.D.H personally acknowledges financial support from grants Minister of Science and Innovation (PID2019-104148GB-I00) and grant (IT1045-16) - 2016 – 2021 of Basque Government.

## SUPPORTING INFORMATION REFERENCES

1. H. Gonzalez-Diaz, S. Arrasate, A. Gomez-SanJuan, N. Sotomayor, E. Lete, L. Besada-Porto and J. M. Ruso, *Current topics in medicinal chemistry*, 2013, 13, 1713-1741.
2. R. Santana, R. Zuluaga, P. Ganán, S. Arrasate, E. Onieva and H. Gonzalez-Diaz, *Nanoscale*, 2019, 11, 21811-21823.
3. R. Santana, R. Zuluaga, P. Ganán, S. Arrasate, E. Onieva and H. Gonzalez-Diaz, *Nanoscale*, 2020, 12, 13471-13483.
4. R. Santana, R. Zuluaga, P. Ganán, S. Arrasate, E. Onieva, M. M. Montemore and H. Gonzalez-Diaz, *Molecular pharmaceutics*, 2020, 17, 2612-2627.
5. H. Jeong, B. Tombor, R. Albert, Z. N. Oltvai and A. L. Barabasi, *Nature*, 2000, 407, 651-654.

6. A. Duardo-Sanchez, C. R. Munteanu, P. Riera-Fernandez, A. Lopez-Diaz, A. Pazos and H. Gonzalez-Diaz, *Journal of chemical information and modeling*, 2014, 54, 16-29.
7. B. H. Junker, D. Koschutski and F. Schreiber, *BMC bioinformatics*, 2006, 7, 219.
8. B. Ortega-Tenezaca, V. Quevedo-Tumaili, H. Bediaga, J. Collados, S. Arrasate, G. Madariaga, C. R. Munteanu, M. Cordeiro and H. Gonzalez-Diaz, *Curr Top Med Chem*, 2020, DOI: 10.2174/1568026620666200916122616.
9. L. Bian, D. C. Sorescu, L. Chen, D. L. White, S. C. Burkert, Y. Khalifa, Z. Zhang, E. Sejdic and A. Star, *ACS Appl Mater Interfaces*, 2019, 11, 1219-1227.
10. M. Alafeef, I. Srivastava and D. Pan, *ACS sensors*, 2020, 5, 1689-1698.
11. B. Sun, M. Fernandez and A. S. Barnard, *Journal of chemical information and modeling*, 2017, 57, 2413-2423.
12. A. S. Barnard and G. Opletal, *Nanoscale*, 2019, 11, 23165-23172.
13. J. He, C. He, C. Zheng, Q. Wang and J. Ye, *Nanoscale*, 2019, 11, 17444-17459.
14. T. Yan, B. Sun and A. S. Barnard, *Nanoscale*, 2018, 10, 21818-21826.
15. T. Hill and P. Lewicki, *Statistics: Methods and Applications*, StatSoft, Inc., 1st edition edn., 2005.
16. H. A. Van Den Berg, *Science progress*, 2018, 101, 261-272.
17. C. J. Huberty and S. Olejnik, *Applied MANOVA and discriminant analysis*, John Wiley & Sons, Inc., Hoboken, New Jersey, 2nd edn., 2006.
18. B. Hanczar, J. Hua, C. Sima, J. Weinstein, M. Bittner and E. R. Dougherty, *Bioinformatics*, 2010, 26, 822-830.
19. M. R. Findlay, D. N. Freitas, M. Mobed-Miremadi and K. E. Wheeler, *Environmental science. Nano*, 2018, 5, 64-71.
20. S. Mallawaarachchi, Y. Liu, S. H. Thang, W. Cheng and M. Premaratne, *Physical chemistry chemical physics : PCCP*, 2019, 21, 24808-24819.
21. M. Vidal, M. E. Cusick and A. L. Barabasi, *Cell*, 2011, 144, 986-998.
22. E. Ravasz, A. L. Somera, D. A. Mongru, Z. N. Oltvai and A. L. Barabasi, *Science*, 2002, 297, 1551-1555.
23. D. M. Bean, C. Stringer, N. Beeknoo, J. Teo and R. J. B. Dobson, *PloS one*, 2017, 12, e0185912.
