# Supplementary material for: IFPTML mapping of nanoparticle antibacterial activity vs. pathogen metabolic networks
Source: Royal Society of Chemistry journal article supplement (doi:10.1039/d0nr07588d), 2020-12-15
Supplement: d0nr07588d2.xlsx [file d0nr07588d2.xlsx]

## Sheet: SOFTPTML
		PTML-LOGR		PTML-RF		PTML-SVM
Nn	f(n,c,j,s)obs	f(n,c,s,j)pred	p(f(n,c,s,j)=1)pred	f(n,c,s,j)pred	p(f(n,c,s,j)=1)pred	f(n,c,s,j)pred	p(f(n,c,s,j)=1)pred	NP_KEY	cn0 = Property	vnj	cn1 = Organism	cn2 = Strain	cn3 = Shape	Ncv	COAT_KEY	cc1 = Coating mult.	cc2 = Poly.	Nsv	MRNs_KEY	cs1 = Gram(+/-)	cs2 = Pathog.	f(n,c,j,s)obs	f(s,j)obs	f(n,j,s)obs	f(n,s)obs	Set	f(vnj(cn0))ref	DSh1(MRNs)cs	DSh2(MRNs)cs	DSh3(Nm)cs	DSh4(Lins)cs	DSh5(Louts)cs	DSh1(AMVn)cn	DSh1(AEn)cn	DSh1(APn)cn	DSh1(APSn)cn	DDSh1(t,1c,2c)	DDSh2(t,1c,2c)	M(x)	AMV	AEv	APv	APS	Time	Coating Smiles	References	Description
1	1	0	0.103698	1	0.731059	0	0.270283	CdS	IC50 (uM)	89.9779	Escherichia coli	K-12	Spherical	16	N/A	None	None	8	EC	Gram-	GIT	1	1	1	1	t	0.111111	-0.004	-0.004	0.100485	0.00996768	0.0108964	-0.146467	-0.10673	-0.147686	-0.130217	-0.000498218	-0.000498218	144.48	14.3	2.135	5.05	3	24		J. Hazard. Mater. 2013 260 1073-1082"	COMPLEMENTARY	CdSSphericalNoneNoneN/A	Gram-GIT
1	1	0	0.103698	1	0.731059	0	0.270283	CdS	IC50 (uM)	89.9779	Escherichia coli	K-12	Spherical	16	N/A	None	None	8	EC	Gram-	GIT	1	1	1	1	t	0.111111	-0.004	-0.004	0.100485	0.00996768	0.0108964	-0.146467	-0.10673	-0.147686	-0.130217	-0.000498218	-0.000498218	144.48	14.3	2.135	5.05	3	24		J. Hazard. Mater. 2013 260 1073-1082"	COMPLEMENTARY	CdSSphericalNoneNoneN/A	Gram-GIT
1	0	0	6.38669e-13	0	0.5	0	0.266463	CdS	IC50 (uM)	89.9779	Escherichia coli	K-12	Spherical	16	N/A	None	None	21	PN	Gram+	RES	0	1	1	0	t	0.111111	-0.000666667	0.00233333	0.123904	0.0718737	0.0736966	-0.146467	-0.10673	-0.147686	-0.130217	-0.000498218	-0.000498218	144.48	14.3	2.135	5.05	3	24		J. Hazard. Mater. 2013 260 1073-1082"	COMPLEMENTARY	CdSSphericalNoneNoneN/A	Gram+RES
1	0	0	8.13514e-11	0	0.5	0	0.266596	CdS	IC50 (uM)	89.9779	Escherichia coli	K-12	Spherical	16	N/A	None	None	24	ST	Gram+	RES	0	1	1	0	t	0.111111	0.00133333	0.00233333	0.124568	0.0735856	0.0748657	-0.146467	-0.10673	-0.147686	-0.130217	-0.000498218	-0.000498218	144.48	14.3	2.135	5.05	3	24		J. Hazard. Mater. 2013 260 1073-1082"	COMPLEMENTARY	CdSSphericalNoneNoneN/A	Gram+RES
1	0	0	0.0203597	0	0.5	0	0.270764	CdS	IC50 (uM)	89.9779	Escherichia coli	K-12	Spherical	16	N/A	None	None	25	TY	Gram+	SYS	0	1	1	0	t	0.111111	-0.0005	-0.0005	0.10259	0.0124517	0.0135345	-0.146467	-0.10673	-0.147686	-0.130217	-0.000498218	-0.000498218	144.48	14.3	2.135	5.05	3	24		J. Hazard. Mater. 2013 260 1073-1082"	COMPLEMENTARY	CdSSphericalNoneNoneN/A	Gram+SYS
1	0	0	0.0203597	0	0.5	0	0.270764	CdS	IC50 (uM)	89.9779	Escherichia coli	K-12	Spherical	16	N/A	None	None	25	TY	Gram+	SYS	0	1	1	0	t	0.111111	-0.0005	-0.0005	0.10259	0.0124517	0.0135345	-0.146467	-0.10673	-0.147686	-0.130217	-0.000498218	-0.000498218	144.48	14.3	2.135	5.05	3	24		J. Hazard. Mater. 2013 260 1073-1082"	COMPLEMENTARY	CdSSphericalNoneNoneN/A	Gram+SYS
1	0	0	6.38669e-13	0	0.5	0	0.266463	CdS	IC50 (uM)	89.9779	Escherichia coli	K-12	Spherical	16	N/A	None	None	21	PN	Gram+	RES	0	1	1	0	t	0.111111	-0.000666667	0.00233333	0.123904	0.0718737	0.0736966	-0.146467	-0.10673	-0.147686	-0.130217	-0.000498218	-0.000498218	144.48	14.3	2.135	5.05	3	24		J. Hazard. Mater. 2013 260 1073-1082"	COMPLEMENTARY	CdSSphericalNoneNoneN/A	Gram+RES
1	0	0	8.13514e-11	0	0.5	0	0.266596	CdS	IC50 (uM)	89.9779	Escherichia coli	K-12	Spherical	16	N/A	None	None	24	ST	Gram+	RES	0	1	1	0	t	0.111111	0.00133333	0.00233333	0.124568	0.0735856	0.0748657	-0.146467	-0.10673	-0.147686	-0.130217	-0.000498218	-0.000498218	144.48	14.3	2.135	5.05	3	24		J. Hazard. Mater. 2013 260 1073-1082"	COMPLEMENTARY	CdSSphericalNoneNoneN/A	Gram+RES
1	0	0	3.53968e-13	0	0.5	0	0.265441	CdS	IC50 (uM)	89.9779	Escherichia coli	K-12	Spherical	16	N/A	None	None	20	PG	Gram-	SYS	0	1	1	0	t	0.111111	-0.00442857	-0.00142857	0.11973	0.0759019	0.0779623	-0.146467	-0.10673	-0.147686	-0.130217	-0.000498218	-0.000498218	144.48	14.3	2.135	5.05	3	24		J. Hazard. Mater. 2013 260 1073-1082"	COMPLEMENTARY	CdSSphericalNoneNoneN/A	Gram-SYS
1	1	0	0.103698	1	0.731059	0	0.270283	CdS	IC50 (uM)	89.9779	Escherichia coli	K-12	Spherical	16	N/A	None	None	8	EC	Gram-	GIT	1	1	1	1	t	0.111111	-0.004	-0.004	0.100485	0.00996768	0.0108964	-0.146467	-0.10673	-0.147686	-0.130217	-0.000498218	-0.000498218	144.48	14.3	2.135	5.05	3	24		J. Hazard. Mater. 2013 260 1073-1082"	COMPLEMENTARY	CdSSphericalNoneNoneN/A	Gram-GIT
1	0	0	0.00535346	0	0.5	0	0.267691	CdS	IC50 (uM)	89.9779	Escherichia coli	K-12	Spherical	16	N/A	None	None	16	MT	Gram-	RES	0	1	1	0	t	0.111111	-0.009	-0.01	0.0993988	0.0302842	0.0319897	-0.146467	-0.10673	-0.147686	-0.130217	-0.000498218	-0.000498218	144.48	14.3	2.135	5.05	3	24		J. Hazard. Mater. 2013 260 1073-1082"	COMPLEMENTARY	CdSSphericalNoneNoneN/A	Gram-RES
1	0	0	2.20262e-12	0	0.5	0	0.265609	CdS	IC50 (uM)	89.9779	Escherichia coli	K-12	Spherical	16	N/A	None	None	4	CJ	Gram-	GIT	0	1	1	0	t	0.111111	-0.002	0	0.122397	0.0791961	0.0807547	-0.146467	-0.10673	-0.147686	-0.130217	-0.000498218	-0.000498218	144.48	14.3	2.135	5.05	3	24		J. Hazard. Mater. 2013 260 1073-1082"	COMPLEMENTARY	CdSSphericalNoneNoneN/A	Gram-GIT
1	1	0	0.103698	1	0.731059	0	0.270283	CdS	IC50 (uM)	89.9779	Escherichia coli	K-12	Spherical	16	N/A	None	None	8	EC	Gram-	GIT	1	1	1	1	t	0.111111	-0.004	-0.004	0.100485	0.00996768	0.0108964	-0.146467	-0.10673	-0.147686	-0.130217	-0.000498218	-0.000498218	144.48	14.3	2.135	5.05	3	24		J. Hazard. Mater. 2013 260 1073-1082"	COMPLEMENTARY	CdSSphericalNoneNoneN/A	Gram-GIT
1	0	0	0.00137814	0	0.5	0	0.268813	CdS	IC50 (uM)	89.9779	Escherichia coli	K-12	Spherical	16	N/A	None	None	10	HI	Gram-	SYS	0	1	1	0	t	0.111111	0.00357143	0.000571429	0.114325	0.0458025	0.0470383	-0.146467	-0.10673	-0.147686	-0.130217	-0.000498218	-0.000498218	144.48	14.3	2.135	5.05	3	24		J. Hazard. Mater. 2013 260 1073-1082"	COMPLEMENTARY	CdSSphericalNoneNoneN/A	Gram-SYS
1	0	0	1.65092e-12	0	0.5	0	0.265729	CdS	IC50 (uM)	89.9779	Escherichia coli	K-12	Spherical	16	N/A	None	None	9	EF	Gram+	GIT	0	1	1	0	t	0.111111	-0.004	-0.001	0.122096	0.0733832	0.0748523	-0.146467	-0.10673	-0.147686	-0.130217	-0.000498218	-0.000498218	144.48	14.3	2.135	5.05	3	24		J. Hazard. Mater. 2013 260 1073-1082"	COMPLEMENTARY	CdSSphericalNoneNoneN/A	Gram+GIT
2	0	0	0.0687747	0	0.5	0	0.269704	CdO	IC50 (uM)	194.689	Escherichia coli	K-12	Spherical	16	N/A	None	None	8	EC	Gram-	GIT	0	1	0	1	t	0.111111	-0.004	-0.004	0.100485	0.00996768	0.0108964	-0.146467	-0.12025	-0.142676	-0.150317	-0.000498218	-0.000498218	128.41	13.55	2.565	3.9965	22	24		Langmuir 2012 28 16614âˆ’16622"	COMPLEMENTARY	CdOSphericalNoneNoneN/A	Gram-GIT
2	0	0	4.07693e-13	0	0.5	0	0.265902	CdO	IC50 (uM)	194.689	Escherichia coli	K-12	Spherical	16	N/A	None	None	21	PN	Gram+	RES	0	1	0	0	t	0.111111	-0.000666667	0.00233333	0.123904	0.0718737	0.0736966	-0.146467	-0.12025	-0.142676	-0.150317	-0.000498218	-0.000498218	128.41	13.55	2.565	3.9965	22	24		Langmuir 2012 28 16614âˆ’16622"	COMPLEMENTARY	CdOSphericalNoneNoneN/A	Gram+RES
2	0	0	5.19306e-11	0	0.5	0	0.266035	CdO	IC50 (uM)	194.689	Escherichia coli	K-12	Spherical	16	N/A	None	None	24	ST	Gram+	RES	0	1	0	0	t	0.111111	0.00133333	0.00233333	0.124568	0.0735856	0.0748657	-0.146467	-0.12025	-0.142676	-0.150317	-0.000498218	-0.000498218	128.41	13.55	2.565	3.9965	22	24		Langmuir 2012 28 16614âˆ’16622"	COMPLEMENTARY	CdOSphericalNoneNoneN/A	Gram+RES
2	0	0	0.013093	0	0.5	0	0.270184	CdO	IC50 (uM)	194.689	Escherichia coli	K-12	Spherical	16	N/A	None	None	25	TY	Gram+	SYS	0	1	0	0	t	0.111111	-0.0005	-0.0005	0.10259	0.0124517	0.0135345	-0.146467	-0.12025	-0.142676	-0.150317	-0.000498218	-0.000498218	128.41	13.55	2.565	3.9965	22	24		Langmuir 2012 28 16614âˆ’16622"	COMPLEMENTARY	CdOSphericalNoneNoneN/A	Gram+SYS
2	0	0	0.0687747	0	0.5	0	0.269704	CdO	IC50 (uM)	194.689	Escherichia coli	K-12	Spherical	16	N/A	None	None	8	EC	Gram-	GIT	0	1	0	1	t	0.111111	-0.004	-0.004	0.100485	0.00996768	0.0108964	-0.146467	-0.12025	-0.142676	-0.150317	-0.000498218	-0.000498218	128.41	13.55	2.565	3.9965	22	24		Langmuir 2012 28 16614âˆ’16622"	COMPLEMENTARY	CdOSphericalNoneNoneN/A	Gram-GIT
2	0	0	0.013093	0	0.5	0	0.270184	CdO	IC50 (uM)	194.689	Escherichia coli	K-12	Spherical	16	N/A	None	None	25	TY	Gram+	SYS	0	1	0	0	t	0.111111	-0.0005	-0.0005	0.10259	0.0124517	0.0135345	-0.146467	-0.12025	-0.142676	-0.150317	-0.000498218	-0.000498218	128.41	13.55	2.565	3.9965	22	24		Langmuir 2012 28 16614âˆ’16622"	COMPLEMENTARY	CdOSphericalNoneNoneN/A	Gram+SYS
2	0	0	4.07693e-13	0	0.5	0	0.265902	CdO	IC50 (uM)	194.689	Escherichia coli	K-12	Spherical	16	N/A	None	None	21	PN	Gram+	RES	0	1	0	0	t	0.111111	-0.000666667	0.00233333	0.123904	0.0718737	0.0736966	-0.146467	-0.12025	-0.142676	-0.150317	-0.000498218	-0.000498218	128.41	13.55	2.565	3.9965	22	24		Langmuir 2012 28 16614âˆ’16622"	COMPLEMENTARY	CdOSphericalNoneNoneN/A	Gram+RES
2	0	0	5.19306e-11	0	0.5	0	0.266035	CdO	IC50 (uM)	194.689	Escherichia coli	K-12	Spherical	16	N/A	None	None	24	ST	Gram+	RES	0	1	0	0	t	0.111111	0.00133333	0.00233333	0.124568	0.0735856	0.0748657	-0.146467	-0.12025	-0.142676	-0.150317	-0.000498218	-0.000498218	128.41	13.55	2.565	3.9965	22	24		Langmuir 2012 28 16614âˆ’16622"	COMPLEMENTARY	CdOSphericalNoneNoneN/A	Gram+RES
2	0	0	0.00342401	0	0.5	0	0.26712	CdO	IC50 (uM)	194.689	Escherichia coli	K-12	Spherical	16	N/A	None	None	16	MT	Gram-	RES	0	1	0	0	t	0.111111	-0.009	-0.01	0.0993988	0.0302842	0.0319897	-0.146467	-0.12025	-0.142676	-0.150317	-0.000498218	-0.000498218	128.41	13.55	2.565	3.9965	22	24		Langmuir 2012 28 16614âˆ’16622"	COMPLEMENTARY	CdOSphericalNoneNoneN/A	Gram-RES
2	0	0	1.40604e-12	0	0.5	0	0.265051	CdO	IC50 (uM)	194.689	Escherichia coli	K-12	Spherical	16	N/A	None	None	4	CJ	Gram-	GIT	0	1	0	0	t	0.111111	-0.002	0	0.122397	0.0791961	0.0807547	-0.146467	-0.12025	-0.142676	-0.150317	-0.000498218	-0.000498218	128.41	13.55	2.565	3.9965	22	24		Langmuir 2012 28 16614âˆ’16622"	COMPLEMENTARY	CdOSphericalNoneNoneN/A	Gram-GIT
2	0	0	1.05386e-12	0	0.5	0	0.265169	CdO	IC50 (uM)	194.689	Escherichia coli	K-12	Spherical	16	N/A	None	None	9	EF	Gram+	GIT	0	1	0	0	t	0.111111	-0.004	-0.001	0.122096	0.0733832	0.0748523	-0.146467	-0.12025	-0.142676	-0.150317	-0.000498218	-0.000498218	128.41	13.55	2.565	3.9965	22	24		Langmuir 2012 28 16614âˆ’16622"	COMPLEMENTARY	CdOSphericalNoneNoneN/A	Gram+GIT
2	0	0	0.00088017	0	0.5	0	0.268242	CdO	IC50 (uM)	194.689	Escherichia coli	K-12	Spherical	16	N/A	None	None	10	HI	Gram-	SYS	0	1	0	0	t	0.111111	0.00357143	0.000571429	0.114325	0.0458025	0.0470383	-0.146467	-0.12025	-0.142676	-0.150317	-0.000498218	-0.000498218	128.41	13.55	2.565	3.9965	22	24		Langmuir 2012 28 16614âˆ’16622"	COMPLEMENTARY	CdOSphericalNoneNoneN/A	Gram-SYS
2	0	0	4.91116e-16	0	0.5	0	0.26353	CdO	IC50 (uM)	194.689	Escherichia coli	K-12	Spherical	16	N/A	None	None	6	CT	Gram-	SYS	0	1	0	0	t	0.111111	0.00457143	0.00557143	0.129748	0.11685	0.11775	-0.146467	-0.12025	-0.142676	-0.150317	-0.000498218	-0.000498218	128.41	13.55	2.565	3.9965	22	24		Langmuir 2012 28 16614âˆ’16622"	COMPLEMENTARY	CdOSphericalNoneNoneN/A	Gram-SYS
2	0	0	2.25955e-13	0	0.5	0	0.264883	CdO	IC50 (uM)	194.689	Escherichia coli	K-12	Spherical	16	N/A	None	None	20	PG	Gram-	SYS	0	1	0	0	t	0.111111	-0.00442857	-0.00142857	0.11973	0.0759019	0.0779623	-0.146467	-0.12025	-0.142676	-0.150317	-0.000498218	-0.000498218	128.41	13.55	2.565	3.9965	22	24		Langmuir 2012 28 16614âˆ’16622"	COMPLEMENTARY	CdOSphericalNoneNoneN/A	Gram-SYS
3	0	0	2.91669e-12	0	0.5	0	0.265063	ZnO	IC50 (uM)	259.188	Escherichia coli	ATCC25254	N/A	16	N/A	None	None	4	CJ	Gram-	GIT	0	1	0	0	t	0.111111	-0.002	0	0.122397	0.0791961	0.0807547	-0.14519	-0.119656	-0.13899	-0.150341	0.00113226	0.00113226	81.408	11.6	2.545	3.5965	35	2		Sci. Total Environ. 2009 407 3070-3072"	COMPLEMENTARY	ZnON/ANoneNoneN/A	Gram-GIT
3	0	0	0.13285	0	0.5	0	0.269716	ZnO	IC50 (uM)	259.188	Escherichia coli	ATCC25254	N/A	16	N/A	None	None	8	EC	Gram-	GIT	0	1	0	1	t	0.111111	-0.004	-0.004	0.100485	0.00996768	0.0108964	-0.14519	-0.119656	-0.13899	-0.150341	0.00113226	0.00113226	81.408	11.6	2.545	3.5965	35	2		Sci. Total Environ. 2009 407 3070-3072"	COMPLEMENTARY	ZnON/ANoneNoneN/A	Gram-GIT
3	0	0	8.45718e-13	0	0.5	0	0.265914	ZnO	IC50 (uM)	259.188	Escherichia coli	ATCC25254	N/A	16	N/A	None	None	21	PN	Gram+	RES	0	1	0	0	t	0.111111	-0.000666667	0.00233333	0.123904	0.0718737	0.0736966	-0.14519	-0.119656	-0.13899	-0.150341	0.00113226	0.00113226	81.408	11.6	2.545	3.5965	35	2		Sci. Total Environ. 2009 407 3070-3072"	COMPLEMENTARY	ZnON/ANoneNoneN/A	Gram+RES
3	0	0	1.07725e-10	0	0.5	0	0.266048	ZnO	IC50 (uM)	259.188	Escherichia coli	ATCC25254	N/A	16	N/A	None	None	24	ST	Gram+	RES	0	1	0	0	t	0.111111	0.00133333	0.00233333	0.124568	0.0735856	0.0748657	-0.14519	-0.119656	-0.13899	-0.150341	0.00113226	0.00113226	81.408	11.6	2.545	3.5965	35	2		Sci. Total Environ. 2009 407 3070-3072"	COMPLEMENTARY	ZnON/ANoneNoneN/A	Gram+RES
3	0	0	0.13285	0	0.5	0	0.269716	ZnO	IC50 (uM)	259.188	Escherichia coli	ATCC25254	N/A	16	N/A	None	None	8	EC	Gram-	GIT	0	1	0	1	t	0.111111	-0.004	-0.004	0.100485	0.00996768	0.0108964	-0.14519	-0.119656	-0.13899	-0.150341	0.00113226	0.00113226	81.408	11.6	2.545	3.5965	35	2		Sci. Total Environ. 2009 407 3070-3072"	COMPLEMENTARY	ZnON/ANoneNoneN/A	Gram-GIT
3	0	0	8.45718e-13	0	0.5	0	0.265914	ZnO	IC50 (uM)	259.188	Escherichia coli	ATCC25254	N/A	16	N/A	None	None	21	PN	Gram+	RES	0	1	0	0	t	0.111111	-0.000666667	0.00233333	0.123904	0.0718737	0.0736966	-0.14519	-0.119656	-0.13899	-0.150341	0.00113226	0.00113226	81.408	11.6	2.545	3.5965	35	2		Sci. Total Environ. 2009 407 3070-3072"	COMPLEMENTARY	ZnON/ANoneNoneN/A	Gram+RES
3	0	0	1.07725e-10	0	0.5	0	0.266048	ZnO	IC50 (uM)	259.188	Escherichia coli	ATCC25254	N/A	16	N/A	None	None	24	ST	Gram+	RES	0	1	0	0	t	0.111111	0.00133333	0.00233333	0.124568	0.0735856	0.0748657	-0.14519	-0.119656	-0.13899	-0.150341	0.00113226	0.00113226	81.408	11.6	2.545	3.5965	35	2		Sci. Total Environ. 2009 407 3070-3072"	COMPLEMENTARY	ZnON/ANoneNoneN/A	Gram+RES
3	0	0	2.18613e-12	0	0.5	0	0.265181	ZnO	IC50 (uM)	259.188	Escherichia coli	ATCC25254	N/A	16	N/A	None	None	9	EF	Gram+	GIT	0	1	0	1	t	0.111111	-0.004	-0.001	0.122096	0.0733832	0.0748523	-0.14519	-0.119656	-0.13899	-0.150341	0.00113226	0.00113226	81.408	11.6	2.545	3.5965	35	2		Sci. Total Environ. 2009 407 3070-3072"	COMPLEMENTARY	ZnON/ANoneNoneN/A	Gram+GIT
3	0	0	0.00707672	0	0.5	0	0.267132	ZnO	IC50 (uM)	259.188	Escherichia coli	ATCC25254	N/A	16	N/A	None	None	16	MT	Gram-	RES	0	1	0	0	t	0.111111	-0.009	-0.01	0.0993988	0.0302842	0.0319897	-0.14519	-0.119656	-0.13899	-0.150341	0.00113226	0.00113226	81.408	11.6	2.545	3.5965	35	2		Sci. Total Environ. 2009 407 3070-3072"	COMPLEMENTARY	ZnON/ANoneNoneN/A	Gram-RES
3	0	0	2.18613e-12	0	0.5	0	0.265181	ZnO	IC50 (uM)	259.188	Escherichia coli	ATCC25254	N/A	16	N/A	None	None	9	EF	Gram+	GIT	0	1	0	0	t	0.111111	-0.004	-0.001	0.122096	0.0733832	0.0748523	-0.14519	-0.119656	-0.13899	-0.150341	0.00113226	0.00113226	81.408	11.6	2.545	3.5965	35	2		Sci. Total Environ. 2009 407 3070-3072"	COMPLEMENTARY	ZnON/ANoneNoneN/A	Gram+GIT
3	0	0	0.0267833	0	0.5	0	0.270196	ZnO	IC50 (uM)	259.188	Escherichia coli	ATCC25254	N/A	16	N/A	None	None	25	TY	Gram+	SYS	0	1	0	0	t	0.111111	-0.0005	-0.0005	0.10259	0.0124517	0.0135345	-0.14519	-0.119656	-0.13899	-0.150341	0.00113226	0.00113226	81.408	11.6	2.545	3.5965	35	2		Sci. Total Environ. 2009 407 3070-3072"	COMPLEMENTARY	ZnON/ANoneNoneN/A	Gram+SYS
3	0	0	0.0018241	0	0.5	0	0.268254	ZnO	IC50 (uM)	259.188	Escherichia coli	ATCC25254	N/A	16	N/A	None	None	10	HI	Gram-	SYS	0	1	0	0	t	0.111111	0.00357143	0.000571429	0.114325	0.0458025	0.0470383	-0.14519	-0.119656	-0.13899	-0.150341	0.00113226	0.00113226	81.408	11.6	2.545	3.5965	35	2		Sci. Total Environ. 2009 407 3070-3072"	COMPLEMENTARY	ZnON/ANoneNoneN/A	Gram-SYS
3	0	0	4.6872e-13	0	0.5	0	0.264895	ZnO	IC50 (uM)	259.188	Escherichia coli	ATCC25254	N/A	16	N/A	None	None	20	PG	Gram-	SYS	0	1	0	0	t	0.111111	-0.00442857	-0.00142857	0.11973	0.0759019	0.0779623	-0.14519	-0.119656	-0.13899	-0.150341	0.00113226	0.00113226	81.408	11.6	2.545	3.5965	35	2		Sci. Total Environ. 2009 407 3070-3072"	COMPLEMENTARY	ZnON/ANoneNoneN/A	Gram-SYS
3	0	0	1.01877e-15	0	0.5	0	0.263542	ZnO	IC50 (uM)	259.188	Escherichia coli	ATCC25254	N/A	16	N/A	None	None	6	CT	Gram-	SYS	0	1	0	0	t	0.111111	0.00457143	0.00557143	0.129748	0.11685	0.11775	-0.14519	-0.119656	-0.13899	-0.150341	0.00113226	0.00113226	81.408	11.6	2.545	3.5965	35	2		Sci. Total Environ. 2009 407 3070-3072"	COMPLEMENTARY	ZnON/ANoneNoneN/A	Gram-SYS
3	0	0	2.91669e-12	0	0.5	0	0.265063	ZnO	IC50 (uM)	259.188	Escherichia coli	ATCC25254	N/A	16	N/A	None	None	4	CJ	Gram-	GIT	0	1	0	0	t	0.111111	-0.002	0	0.122397	0.0791961	0.0807547	-0.14519	-0.119656	-0.13899	-0.150341	0.00113226	0.00113226	81.408	11.6	2.545	3.5965	35	2		Sci. Total Environ. 2009 407 3070-3072"	COMPLEMENTARY	ZnON/ANoneNoneN/A	Gram-GIT
4	0	0	2.92653e-12	0	0.5	0	0.265063	CuO	IC50 (uM)	810.862	Escherichia coli	ATCC25254	N/A	16	N/A	None	None	4	CJ	Gram-	GIT	0	1	0	0	t	0.111111	-0.002	0	0.122397	0.0791961	0.0807547	-0.145182	-0.123489	-0.140527	-0.150341	0.00113226	0.00113226	79.545	10.55	2.695	3.7465	35	2		Sci. Total Environ. 2009 407 3070-3072"	COMPLEMENTARY	CuON/ANoneNoneN/A	Gram-GIT
4	0	0	0.133238	0	0.5	0	0.269716	CuO	IC50 (uM)	810.862	Escherichia coli	ATCC25254	N/A	16	N/A	None	None	8	EC	Gram-	GIT	0	1	0	1	t	0.111111	-0.004	-0.004	0.100485	0.00996768	0.0108964	-0.145182	-0.123489	-0.140527	-0.150341	0.00113226	0.00113226	79.545	10.55	2.695	3.7465	35	2		Sci. Total Environ. 2009 407 3070-3072"	COMPLEMENTARY	CuON/ANoneNoneN/A	Gram-GIT
4	0	0	8.48571e-13	0	0.5	0	0.265914	CuO	IC50 (uM)	810.862	Escherichia coli	ATCC25254	N/A	16	N/A	None	None	21	PN	Gram+	RES	0	1	0	0	t	0.111111	-0.000666667	0.00233333	0.123904	0.0718737	0.0736966	-0.145182	-0.123489	-0.140527	-0.150341	0.00113226	0.00113226	79.545	10.55	2.695	3.7465	35	2		Sci. Total Environ. 2009 407 3070-3072"	COMPLEMENTARY	CuON/ANoneNoneN/A	Gram+RES
4	0	0	1.08088e-10	0	0.5	0	0.266048	CuO	IC50 (uM)	810.862	Escherichia coli	ATCC25254	N/A	16	N/A	None	None	24	ST	Gram+	RES	0	1	0	0	t	0.111111	0.00133333	0.00233333	0.124568	0.0735856	0.0748657	-0.145182	-0.123489	-0.140527	-0.150341	0.00113226	0.00113226	79.545	10.55	2.695	3.7465	35	2		Sci. Total Environ. 2009 407 3070-3072"	COMPLEMENTARY	CuON/ANoneNoneN/A	Gram+RES
4	0	0	0.133238	0	0.5	0	0.269716	CuO	IC50 (uM)	810.862	Escherichia coli	ATCC25254	N/A	16	N/A	None	None	8	EC	Gram-	GIT	0	1	0	1	t	0.111111	-0.004	-0.004	0.100485	0.00996768	0.0108964	-0.145182	-0.123489	-0.140527	-0.150341	0.00113226	0.00113226	79.545	10.55	2.695	3.7465	35	2		Sci. Total Environ. 2009 407 3070-3072"	COMPLEMENTARY	CuON/ANoneNoneN/A	Gram-GIT
4	0	0	8.48571e-13	0	0.5	0	0.265914	CuO	IC50 (uM)	810.862	Escherichia coli	ATCC25254	N/A	16	N/A	None	None	21	PN	Gram+	RES	0	1	0	0	t	0.111111	-0.000666667	0.00233333	0.123904	0.0718737	0.0736966	-0.145182	-0.123489	-0.140527	-0.150341	0.00113226	0.00113226	79.545	10.55	2.695	3.7465	35	2		Sci. Total Environ. 2009 407 3070-3072"	COMPLEMENTARY	CuON/ANoneNoneN/A	Gram+RES
4	0	0	1.08088e-10	0	0.5	0	0.266048	CuO	IC50 (uM)	810.862	Escherichia coli	ATCC25254	N/A	16	N/A	None	None	24	ST	Gram+	RES	0	1	0	0	t	0.111111	0.00133333	0.00233333	0.124568	0.0735856	0.0748657	-0.145182	-0.123489	-0.140527	-0.150341	0.00113226	0.00113226	79.545	10.55	2.695	3.7465	35	2		Sci. Total Environ. 2009 407 3070-3072"	COMPLEMENTARY	CuON/ANoneNoneN/A	Gram+RES
4	0	0	0.00710042	0	0.5	0	0.267132	CuO	IC50 (uM)	810.862	Escherichia coli	ATCC25254	N/A	16	N/A	None	None	16	MT	Gram-	RES	0	1	0	0	t	0.111111	-0.009	-0.01	0.0993988	0.0302842	0.0319897	-0.145182	-0.123489	-0.140527	-0.150341	0.00113226	0.00113226	79.545	10.55	2.695	3.7465	35	2		Sci. Total Environ. 2009 407 3070-3072"	COMPLEMENTARY	CuON/ANoneNoneN/A	Gram-RES
4	0	0	0.0268713	0	0.5	0	0.270196	CuO	IC50 (uM)	810.862	Escherichia coli	ATCC25254	N/A	16	N/A	None	None	25	TY	Gram+	SYS	0	1	0	0	t	0.111111	-0.0005	-0.0005	0.10259	0.0124517	0.0135345	-0.145182	-0.123489	-0.140527	-0.150341	0.00113226	0.00113226	79.545	10.55	2.695	3.7465	35	2		Sci. Total Environ. 2009 407 3070-3072"	COMPLEMENTARY	CuON/ANoneNoneN/A	Gram+SYS
4	0	0	0.00183024	0	0.5	0	0.268254	CuO	IC50 (uM)	810.862	Escherichia coli	ATCC25254	N/A	16	N/A	None	None	10	HI	Gram-	SYS	0	1	0	0	t	0.111111	0.00357143	0.000571429	0.114325	0.0458025	0.0470383	-0.145182	-0.123489	-0.140527	-0.150341	0.00113226	0.00113226	79.545	10.55	2.695	3.7465	35	2		Sci. Total Environ. 2009 407 3070-3072"	COMPLEMENTARY	CuON/ANoneNoneN/A	Gram-SYS
4	0	0	4.70301e-13	0	0.5	0	0.264895	CuO	IC50 (uM)	810.862	Escherichia coli	ATCC25254	N/A	16	N/A	None	None	20	PG	Gram-	SYS	0	1	0	0	t	0.111111	-0.00442857	-0.00142857	0.11973	0.0759019	0.0779623	-0.145182	-0.123489	-0.140527	-0.150341	0.00113226	0.00113226	79.545	10.55	2.695	3.7465	35	2		Sci. Total Environ. 2009 407 3070-3072"	COMPLEMENTARY	CuON/ANoneNoneN/A	Gram-SYS
4	0	0	2.1935e-12	0	0.5	0	0.265181	CuO	IC50 (uM)	810.862	Escherichia coli	ATCC25254	N/A	16	N/A	None	None	9	EF	Gram+	GIT	0	1	0	0	t	0.111111	-0.004	-0.001	0.122096	0.0733832	0.0748523	-0.145182	-0.123489	-0.140527	-0.150341	0.00113226	0.00113226	79.545	10.55	2.695	3.7465	35	2		Sci. Total Environ. 2009 407 3070-3072"	COMPLEMENTARY	CuON/ANoneNoneN/A	Gram+GIT
4	0	0	1.02221e-15	0	0.5	0	0.263543	CuO	IC50 (uM)	810.862	Escherichia coli	ATCC25254	N/A	16	N/A	None	None	6	CT	Gram-	SYS	0	1	0	0	t	0.111111	0.00457143	0.00557143	0.129748	0.11685	0.11775	-0.145182	-0.123489	-0.140527	-0.150341	0.00113226	0.00113226	79.545	10.55	2.695	3.7465	35	2		Sci. Total Environ. 2009 407 3070-3072"	COMPLEMENTARY	CuON/ANoneNoneN/A	Gram-SYS
5	0	0	0.132642	0	0.5	0	0.269716	La2O3	IC50 (uM)	1402.36	Escherichia coli	ATCC25254	N/A	16	N/A	None	None	8	EC	Gram-	GIT	0	1	0	1	t	0.111111	-0.004	-0.004	0.100485	0.00996768	0.0108964	-0.145194	-0.118528	-0.150423	-0.150341	0.00113226	0.00113226	325.809	17.4	2.504	12.9158	35	2		Sci. Total Environ. 2009 407 3070-3072"	COMPLEMENTARY	La2O3N/ANoneNoneN/A	Gram-GIT
5	0	0	8.4419e-13	0	0.5	0	0.265914	La2O3	IC50 (uM)	1402.36	Escherichia coli	ATCC25254	N/A	16	N/A	None	None	21	PN	Gram+	RES	0	1	0	0	t	0.111111	-0.000666667	0.00233333	0.123904	0.0718737	0.0736966	-0.145194	-0.118528	-0.150423	-0.150341	0.00113226	0.00113226	325.809	17.4	2.504	12.9158	35	2		Sci. Total Environ. 2009 407 3070-3072"	COMPLEMENTARY	La2O3N/ANoneNoneN/A	Gram+RES
5	0	0	1.0753e-10	0	0.5	0	0.266048	La2O3	IC50 (uM)	1402.36	Escherichia coli	ATCC25254	N/A	16	N/A	None	None	24	ST	Gram+	RES	0	1	0	0	t	0.111111	0.00133333	0.00233333	0.124568	0.0735856	0.0748657	-0.145194	-0.118528	-0.150423	-0.150341	0.00113226	0.00113226	325.809	17.4	2.504	12.9158	35	2		Sci. Total Environ. 2009 407 3070-3072"	COMPLEMENTARY	La2O3N/ANoneNoneN/A	Gram+RES
5	0	0	0.132642	0	0.5	0	0.269716	La2O3	IC50 (uM)	1402.36	Escherichia coli	ATCC25254	N/A	16	N/A	None	None	8	EC	Gram-	GIT	0	1	0	1	t	0.111111	-0.004	-0.004	0.100485	0.00996768	0.0108964	-0.145194	-0.118528	-0.150423	-0.150341	0.00113226	0.00113226	325.809	17.4	2.504	12.9158	35	2		Sci. Total Environ. 2009 407 3070-3072"	COMPLEMENTARY	La2O3N/ANoneNoneN/A	Gram-GIT
5	0	0	8.4419e-13	0	0.5	0	0.265914	La2O3	IC50 (uM)	1402.36	Escherichia coli	ATCC25254	N/A	16	N/A	None	None	21	PN	Gram+	RES	0	1	0	0	t	0.111111	-0.000666667	0.00233333	0.123904	0.0718737	0.0736966	-0.145194	-0.118528	-0.150423	-0.150341	0.00113226	0.00113226	325.809	17.4	2.504	12.9158	35	2		Sci. Total Environ. 2009 407 3070-3072"	COMPLEMENTARY	La2O3N/ANoneNoneN/A	Gram+RES
5	0	0	1.0753e-10	0	0.5	0	0.266048	La2O3	IC50 (uM)	1402.36	Escherichia coli	ATCC25254	N/A	16	N/A	None	None	24	ST	Gram+	RES	0	1	0	0	t	0.111111	0.00133333	0.00233333	0.124568	0.0735856	0.0748657	-0.145194	-0.118528	-0.150423	-0.150341	0.00113226	0.00113226	325.809	17.4	2.504	12.9158	35	2		Sci. Total Environ. 2009 407 3070-3072"	COMPLEMENTARY	La2O3N/ANoneNoneN/A	Gram+RES
5	0	0	0.00706402	0	0.5	0	0.267132	La2O3	IC50 (uM)	1402.36	Escherichia coli	ATCC25254	N/A	16	N/A	None	None	16	MT	Gram-	RES	0	1	0	0	t	0.111111	-0.009	-0.01	0.0993988	0.0302842	0.0319897	-0.145194	-0.118528	-0.150423	-0.150341	0.00113226	0.00113226	325.809	17.4	2.504	12.9158	35	2		Sci. Total Environ. 2009 407 3070-3072"	COMPLEMENTARY	La2O3N/ANoneNoneN/A	Gram-RES
5	0	0	2.18218e-12	0	0.5	0	0.265181	La2O3	IC50 (uM)	1402.36	Escherichia coli	ATCC25254	N/A	16	N/A	None	None	9	EF	Gram+	GIT	0	1	0	1	t	0.111111	-0.004	-0.001	0.122096	0.0733832	0.0748523	-0.145194	-0.118528	-0.150423	-0.150341	0.00113226	0.00113226	325.809	17.4	2.504	12.9158	35	2		Sci. Total Environ. 2009 407 3070-3072"	COMPLEMENTARY	La2O3N/ANoneNoneN/A	Gram+GIT
5	0	0	2.18218e-12	0	0.5	0	0.265181	La2O3	IC50 (uM)	1402.36	Escherichia coli	ATCC25254	N/A	16	N/A	None	None	9	EF	Gram+	GIT	0	1	0	0	t	0.111111	-0.004	-0.001	0.122096	0.0733832	0.0748523	-0.145194	-0.118528	-0.150423	-0.150341	0.00113226	0.00113226	325.809	17.4	2.504	12.9158	35	2		Sci. Total Environ. 2009 407 3070-3072"	COMPLEMENTARY	La2O3N/ANoneNoneN/A	Gram+GIT
5	0	0	0.0267362	0	0.5	0	0.270196	La2O3	IC50 (uM)	1402.36	Escherichia coli	ATCC25254	N/A	16	N/A	None	None	25	TY	Gram+	SYS	0	1	0	0	t	0.111111	-0.0005	-0.0005	0.10259	0.0124517	0.0135345	-0.145194	-0.118528	-0.150423	-0.150341	0.00113226	0.00113226	325.809	17.4	2.504	12.9158	35	2		Sci. Total Environ. 2009 407 3070-3072"	COMPLEMENTARY	La2O3N/ANoneNoneN/A	Gram+SYS
5	0	0	0.00182081	0	0.5	0	0.268254	La2O3	IC50 (uM)	1402.36	Escherichia coli	ATCC25254	N/A	16	N/A	None	None	10	HI	Gram-	SYS	0	1	0	0	t	0.111111	0.00357143	0.000571429	0.114325	0.0458025	0.0470383	-0.145194	-0.118528	-0.150423	-0.150341	0.00113226	0.00113226	325.809	17.4	2.504	12.9158	35	2		Sci. Total Environ. 2009 407 3070-3072"	COMPLEMENTARY	La2O3N/ANoneNoneN/A	Gram-SYS
5	0	0	4.67873e-13	0	0.5	0	0.264895	La2O3	IC50 (uM)	1402.36	Escherichia coli	ATCC25254	N/A	16	N/A	None	None	20	PG	Gram-	SYS	0	1	0	0	t	0.111111	-0.00442857	-0.00142857	0.11973	0.0759019	0.0779623	-0.145194	-0.118528	-0.150423	-0.150341	0.00113226	0.00113226	325.809	17.4	2.504	12.9158	35	2		Sci. Total Environ. 2009 407 3070-3072"	COMPLEMENTARY	La2O3N/ANoneNoneN/A	Gram-SYS
5	0	0	1.01693e-15	0	0.5	0	0.263542	La2O3	IC50 (uM)	1402.36	Escherichia coli	ATCC25254	N/A	16	N/A	None	None	6	CT	Gram-	SYS	0	1	0	0	t	0.111111	0.00457143	0.00557143	0.129748	0.11685	0.11775	-0.145194	-0.118528	-0.150423	-0.150341	0.00113226	0.00113226	325.809	17.4	2.504	12.9158	35	2		Sci. Total Environ. 2009 407 3070-3072"	COMPLEMENTARY	La2O3N/ANoneNoneN/A	Gram-SYS
5	0	0	0.274243	0	0.5	0	0.270713	La2O3	IC50 (uM)	1402.36	Escherichia coli	ATCC25254	N/A	16	N/A	None	None	19	PA	Gram-	SYS	0	1	0	0	t	0.111111	0.00657143	0.00357143	0.102611	0.0205758	0.0222078	-0.145194	-0.118528	-0.150423	-0.150341	0.00113226	0.00113226	325.809	17.4	2.504	12.9158	35	2		Sci. Total Environ. 2009 407 3070-3072"	COMPLEMENTARY	La2O3N/ANoneNoneN/A	Gram-SYS
6	0	0	2.9138e-12	0	0.5	0	0.265063	Al2O3	IC50 (uM)	3198.31	Escherichia coli	ATCC25254	N/A	16	N/A	None	None	4	CJ	Gram-	GIT	0	1	0	0	t	0.111111	-0.002	0	0.122397	0.0791961	0.0807547	-0.145192	-0.1238	-0.140988	-0.150341	0.00113226	0.00113226	101.96	12.392	2.708	3.7958	35	2		Sci. Total Environ. 2009 407 3070-3072"	COMPLEMENTARY	Al2O3N/ANoneNoneN/A	Gram-GIT
6	0	0	0.132735	0	0.5	0	0.269716	Al2O3	IC50 (uM)	3198.31	Escherichia coli	ATCC25254	N/A	16	N/A	None	None	8	EC	Gram-	GIT	0	1	0	1	t	0.111111	-0.004	-0.004	0.100485	0.00996768	0.0108964	-0.145192	-0.1238	-0.140988	-0.150341	0.00113226	0.00113226	101.96	12.392	2.708	3.7958	35	2		Sci. Total Environ. 2009 407 3070-3072"	COMPLEMENTARY	Al2O3N/ANoneNoneN/A	Gram-GIT
6	0	0	8.44879e-13	0	0.5	0	0.265914	Al2O3	IC50 (uM)	3198.31	Escherichia coli	ATCC25254	N/A	16	N/A	None	None	21	PN	Gram+	RES	0	1	0	0	t	0.111111	-0.000666667	0.00233333	0.123904	0.0718737	0.0736966	-0.145192	-0.1238	-0.140988	-0.150341	0.00113226	0.00113226	101.96	12.392	2.708	3.7958	35	2		Sci. Total Environ. 2009 407 3070-3072"	COMPLEMENTARY	Al2O3N/ANoneNoneN/A	Gram+RES
6	0	0	1.07618e-10	0	0.5	0	0.266048	Al2O3	IC50 (uM)	3198.31	Escherichia coli	ATCC25254	N/A	16	N/A	None	None	24	ST	Gram+	RES	0	1	0	0	t	0.111111	0.00133333	0.00233333	0.124568	0.0735856	0.0748657	-0.145192	-0.1238	-0.140988	-0.150341	0.00113226	0.00113226	101.96	12.392	2.708	3.7958	35	2		Sci. Total Environ. 2009 407 3070-3072"	COMPLEMENTARY	Al2O3N/ANoneNoneN/A	Gram+RES
6	0	0	0.132735	0	0.5	0	0.269716	Al2O3	IC50 (uM)	3198.31	Escherichia coli	ATCC25254	N/A	16	N/A	None	None	8	EC	Gram-	GIT	0	1	0	1	t	0.111111	-0.004	-0.004	0.100485	0.00996768	0.0108964	-0.145192	-0.1238	-0.140988	-0.150341	0.00113226	0.00113226	101.96	12.392	2.708	3.7958	35	2		Sci. Total Environ. 2009 407 3070-3072"	COMPLEMENTARY	Al2O3N/ANoneNoneN/A	Gram-GIT
6	0	0	8.44879e-13	0	0.5	0	0.265914	Al2O3	IC50 (uM)	3198.31	Escherichia coli	ATCC25254	N/A	16	N/A	None	None	21	PN	Gram+	RES	0	1	0	0	t	0.111111	-0.000666667	0.00233333	0.123904	0.0718737	0.0736966	-0.145192	-0.1238	-0.140988	-0.150341	0.00113226	0.00113226	101.96	12.392	2.708	3.7958	35	2		Sci. Total Environ. 2009 407 3070-3072"	COMPLEMENTARY	Al2O3N/ANoneNoneN/A	Gram+RES
6	0	0	1.07618e-10	0	0.5	0	0.266048	Al2O3	IC50 (uM)	3198.31	Escherichia coli	ATCC25254	N/A	16	N/A	None	None	24	ST	Gram+	RES	0	1	0	0	t	0.111111	0.00133333	0.00233333	0.124568	0.0735856	0.0748657	-0.145192	-0.1238	-0.140988	-0.150341	0.00113226	0.00113226	101.96	12.392	2.708	3.7958	35	2		Sci. Total Environ. 2009 407 3070-3072"	COMPLEMENTARY	Al2O3N/ANoneNoneN/A	Gram+RES
6	0	0	4.68255e-13	0	0.5	0	0.264895	Al2O3	IC50 (uM)	3198.31	Escherichia coli	ATCC25254	N/A	16	N/A	None	None	20	PG	Gram-	SYS	0	1	0	0	t	0.111111	-0.00442857	-0.00142857	0.11973	0.0759019	0.0779623	-0.145192	-0.1238	-0.140988	-0.150341	0.00113226	0.00113226	101.96	12.392	2.708	3.7958	35	2		Sci. Total Environ. 2009 407 3070-3072"	COMPLEMENTARY	Al2O3N/ANoneNoneN/A	Gram-SYS
6	0	0	0.00706975	0	0.5	0	0.267132	Al2O3	IC50 (uM)	3198.31	Escherichia coli	ATCC25254	N/A	16	N/A	None	None	16	MT	Gram-	RES	0	1	0	0	t	0.111111	-0.009	-0.01	0.0993988	0.0302842	0.0319897	-0.145192	-0.1238	-0.140988	-0.150341	0.00113226	0.00113226	101.96	12.392	2.708	3.7958	35	2		Sci. Total Environ. 2009 407 3070-3072"	COMPLEMENTARY	Al2O3N/ANoneNoneN/A	Gram-RES
6	0	0	2.18396e-12	0	0.5	0	0.265181	Al2O3	IC50 (uM)	3198.31	Escherichia coli	ATCC25254	N/A	16	N/A	None	None	9	EF	Gram+	GIT	0	1	0	1	t	0.111111	-0.004	-0.001	0.122096	0.0733832	0.0748523	-0.145192	-0.1238	-0.140988	-0.150341	0.00113226	0.00113226	101.96	12.392	2.708	3.7958	35	2		Sci. Total Environ. 2009 407 3070-3072"	COMPLEMENTARY	Al2O3N/ANoneNoneN/A	Gram+GIT
6	0	0	1.01776e-15	0	0.5	0	0.263542	Al2O3	IC50 (uM)	3198.31	Escherichia coli	ATCC25254	N/A	16	N/A	None	None	6	CT	Gram-	SYS	0	1	0	0	t	0.111111	0.00457143	0.00557143	0.129748	0.11685	0.11775	-0.145192	-0.1238	-0.140988	-0.150341	0.00113226	0.00113226	101.96	12.392	2.708	3.7958	35	2		Sci. Total Environ. 2009 407 3070-3072"	COMPLEMENTARY	Al2O3N/ANoneNoneN/A	Gram-SYS
6	0	0	2.18396e-12	0	0.5	0	0.265181	Al2O3	IC50 (uM)	3198.31	Escherichia coli	ATCC25254	N/A	16	N/A	None	None	9	EF	Gram+	GIT	0	1	0	0	t	0.111111	-0.004	-0.001	0.122096	0.0733832	0.0748523	-0.145192	-0.1238	-0.140988	-0.150341	0.00113226	0.00113226	101.96	12.392	2.708	3.7958	35	2		Sci. Total Environ. 2009 407 3070-3072"	COMPLEMENTARY	Al2O3N/ANoneNoneN/A	Gram+GIT
6	0	0	0.0267575	0	0.5	0	0.270196	Al2O3	IC50 (uM)	3198.31	Escherichia coli	ATCC25254	N/A	16	N/A	None	None	25	TY	Gram+	SYS	0	1	0	0	t	0.111111	-0.0005	-0.0005	0.10259	0.0124517	0.0135345	-0.145192	-0.1238	-0.140988	-0.150341	0.00113226	0.00113226	101.96	12.392	2.708	3.7958	35	2		Sci. Total Environ. 2009 407 3070-3072"	COMPLEMENTARY	Al2O3N/ANoneNoneN/A	Gram+SYS
6	0	0	0.00182229	0	0.5	0	0.268254	Al2O3	IC50 (uM)	3198.31	Escherichia coli	ATCC25254	N/A	16	N/A	None	None	10	HI	Gram-	SYS	0	1	0	0	t	0.111111	0.00357143	0.000571429	0.114325	0.0458025	0.0470383	-0.145192	-0.1238	-0.140988	-0.150341	0.00113226	0.00113226	101.96	12.392	2.708	3.7958	35	2		Sci. Total Environ. 2009 407 3070-3072"	COMPLEMENTARY	Al2O3N/ANoneNoneN/A	Gram-SYS
6	0	0	2.9138e-12	0	0.5	0	0.265063	Al2O3	IC50 (uM)	3198.31	Escherichia coli	ATCC25254	N/A	16	N/A	None	None	4	CJ	Gram-	GIT	0	1	0	0	t	0.111111	-0.002	0	0.122397	0.0791961	0.0807547	-0.145192	-0.1238	-0.140988	-0.150341	0.00113226	0.00113226	101.96	12.392	2.708	3.7958	35	2		Sci. Total Environ. 2009 407 3070-3072"	COMPLEMENTARY	Al2O3N/ANoneNoneN/A	Gram-GIT
7	0	0	0.13294	0	0.5	0	0.269716	Fe2O3	IC50 (uM)	3997.12	Escherichia coli	ATCC25254	N/A	16	N/A	None	None	8	EC	Gram-	GIT	0	1	0	1	t	0.111111	-0.004	-0.004	0.100485	0.00996768	0.0108964	-0.145188	-0.126435	-0.141346	-0.150341	0.00113226	0.00113226	159.69	11.24	2.824	3.8358	35	2		Sci. Total Environ. 2009 407 3070-3072"	COMPLEMENTARY	Fe2O3N/ANoneNoneN/A	Gram-GIT
7	0	0	8.46382e-13	0	0.5	0	0.265914	Fe2O3	IC50 (uM)	3997.12	Escherichia coli	ATCC25254	N/A	16	N/A	None	None	21	PN	Gram+	RES	0	1	0	0	t	0.111111	-0.000666667	0.00233333	0.123904	0.0718737	0.0736966	-0.145188	-0.126435	-0.141346	-0.150341	0.00113226	0.00113226	159.69	11.24	2.824	3.8358	35	2		Sci. Total Environ. 2009 407 3070-3072"	COMPLEMENTARY	Fe2O3N/ANoneNoneN/A	Gram+RES
7	0	0	1.07809e-10	0	0.5	0	0.266048	Fe2O3	IC50 (uM)	3997.12	Escherichia coli	ATCC25254	N/A	16	N/A	None	None	24	ST	Gram+	RES	0	1	0	0	t	0.111111	0.00133333	0.00233333	0.124568	0.0735856	0.0748657	-0.145188	-0.126435	-0.141346	-0.150341	0.00113226	0.00113226	159.69	11.24	2.824	3.8358	35	2		Sci. Total Environ. 2009 407 3070-3072"	COMPLEMENTARY	Fe2O3N/ANoneNoneN/A	Gram+RES
7	0	0	0.13294	0	0.5	0	0.269716	Fe2O3	IC50 (uM)	3997.12	Escherichia coli	ATCC25254	N/A	16	N/A	None	None	8	EC	Gram-	GIT	0	1	0	1	t	0.111111	-0.004	-0.004	0.100485	0.00996768	0.0108964	-0.145188	-0.126435	-0.141346	-0.150341	0.00113226	0.00113226	159.69	11.24	2.824	3.8358	35	2		Sci. Total Environ. 2009 407 3070-3072"	COMPLEMENTARY	Fe2O3N/ANoneNoneN/A	Gram-GIT
7	0	0	8.46382e-13	0	0.5	0	0.265914	Fe2O3	IC50 (uM)	3997.12	Escherichia coli	ATCC25254	N/A	16	N/A	None	None	21	PN	Gram+	RES	0	1	0	0	t	0.111111	-0.000666667	0.00233333	0.123904	0.0718737	0.0736966	-0.145188	-0.126435	-0.141346	-0.150341	0.00113226	0.00113226	159.69	11.24	2.824	3.8358	35	2		Sci. Total Environ. 2009 407 3070-3072"	COMPLEMENTARY	Fe2O3N/ANoneNoneN/A	Gram+RES
7	0	0	1.07809e-10	0	0.5	0	0.266048	Fe2O3	IC50 (uM)	3997.12	Escherichia coli	ATCC25254	N/A	16	N/A	None	None	24	ST	Gram+	RES	0	1	0	0	t	0.111111	0.00133333	0.00233333	0.124568	0.0735856	0.0748657	-0.145188	-0.126435	-0.141346	-0.150341	0.00113226	0.00113226	159.69	11.24	2.824	3.8358	35	2		Sci. Total Environ. 2009 407 3070-3072"	COMPLEMENTARY	Fe2O3N/ANoneNoneN/A	Gram+RES
7	0	0	4.69088e-13	0	0.5	0	0.264895	Fe2O3	IC50 (uM)	3997.12	Escherichia coli	ATCC25254	N/A	16	N/A	None	None	20	PG	Gram-	SYS	0	1	0	0	t	0.111111	-0.00442857	-0.00142857	0.11973	0.0759019	0.0779623	-0.145188	-0.126435	-0.141346	-0.150341	0.00113226	0.00113226	159.69	11.24	2.824	3.8358	35	2		Sci. Total Environ. 2009 407 3070-3072"	COMPLEMENTARY	Fe2O3N/ANoneNoneN/A	Gram-SYS
7	0	0	0.00182553	0	0.5	0	0.268254	Fe2O3	IC50 (uM)	3997.12	Escherichia coli	ATCC25254	N/A	16	N/A	None	None	10	HI	Gram-	SYS	0	1	0	0	t	0.111111	0.00357143	0.000571429	0.114325	0.0458025	0.0470383	-0.145188	-0.126435	-0.141346	-0.150341	0.00113226	0.00113226	159.69	11.24	2.824	3.8358	35	2		Sci. Total Environ. 2009 407 3070-3072"	COMPLEMENTARY	Fe2O3N/ANoneNoneN/A	Gram-SYS
7	0	0	0.00708224	0	0.5	0	0.267132	Fe2O3	IC50 (uM)	3997.12	Escherichia coli	ATCC25254	N/A	16	N/A	None	None	16	MT	Gram-	RES	0	1	0	0	t	0.111111	-0.009	-0.01	0.0993988	0.0302842	0.0319897	-0.145188	-0.126435	-0.141346	-0.150341	0.00113226	0.00113226	159.69	11.24	2.824	3.8358	35	2		Sci. Total Environ. 2009 407 3070-3072"	COMPLEMENTARY	Fe2O3N/ANoneNoneN/A	Gram-RES
7	0	0	2.18784e-12	0	0.5	0	0.265181	Fe2O3	IC50 (uM)	3997.12	Escherichia coli	ATCC25254	N/A	16	N/A	None	None	9	EF	Gram+	GIT	0	1	0	1	t	0.111111	-0.004	-0.001	0.122096	0.0733832	0.0748523	-0.145188	-0.126435	-0.141346	-0.150341	0.00113226	0.00113226	159.69	11.24	2.824	3.8358	35	2		Sci. Total Environ. 2009 407 3070-3072"	COMPLEMENTARY	Fe2O3N/ANoneNoneN/A	Gram+GIT
7	0	0	0.0268038	0	0.5	0	0.270196	Fe2O3	IC50 (uM)	3997.12	Escherichia coli	ATCC25254	N/A	16	N/A	None	None	25	TY	Gram+	SYS	0	1	0	0	t	0.111111	-0.0005	-0.0005	0.10259	0.0124517	0.0135345	-0.145188	-0.126435	-0.141346	-0.150341	0.00113226	0.00113226	159.69	11.24	2.824	3.8358	35	2		Sci. Total Environ. 2009 407 3070-3072"	COMPLEMENTARY	Fe2O3N/ANoneNoneN/A	Gram+SYS
7	0	0	1.01957e-15	0	0.5	0	0.263542	Fe2O3	IC50 (uM)	3997.12	Escherichia coli	ATCC25254	N/A	16	N/A	None	None	6	CT	Gram-	SYS	0	1	0	0	t	0.111111	0.00457143	0.00557143	0.129748	0.11685	0.11775	-0.145188	-0.126435	-0.141346	-0.150341	0.00113226	0.00113226	159.69	11.24	2.824	3.8358	35	2		Sci. Total Environ. 2009 407 3070-3072"	COMPLEMENTARY	Fe2O3N/ANoneNoneN/A	Gram-SYS
7	0	0	2.18784e-12	0	0.5	0	0.265181	Fe2O3	IC50 (uM)	3997.12	Escherichia coli	ATCC25254	N/A	16	N/A	None	None	9	EF	Gram+	GIT	0	1	0	0	t	0.111111	-0.004	-0.001	0.122096	0.0733832	0.0748523	-0.145188	-0.126435	-0.141346	-0.150341	0.00113226	0.00113226	159.69	11.24	2.824	3.8358	35	2		Sci. Total Environ. 2009 407 3070-3072"	COMPLEMENTARY	Fe2O3N/ANoneNoneN/A	Gram+GIT
8	0	0	2.91163e-12	0	0.5	0	0.265063	SnO2	IC50 (uM)	6937.87	Escherichia coli	ATCC25254	N/A	16	N/A	None	None	4	CJ	Gram-	GIT	0	1	0	0	t	0.111111	-0.002	0	0.122397	0.0791961	0.0807547	-0.145194	-0.128959	-0.132032	-0.150341	0.00113226	0.00113226	150.709	14.7667	2.94667	3.09533	35	2		Sci. Total Environ. 2009 407 3070-3072"	COMPLEMENTARY	SnO2N/ANoneNoneN/A	Gram-GIT
8	0	0	0.13265	0	0.5	0	0.269716	SnO2	IC50 (uM)	6937.87	Escherichia coli	ATCC25254	N/A	16	N/A	None	None	8	EC	Gram-	GIT	0	1	0	1	t	0.111111	-0.004	-0.004	0.100485	0.00996768	0.0108964	-0.145194	-0.128959	-0.132032	-0.150341	0.00113226	0.00113226	150.709	14.7667	2.94667	3.09533	35	2		Sci. Total Environ. 2009 407 3070-3072"	COMPLEMENTARY	SnO2N/ANoneNoneN/A	Gram-GIT
8	0	0	8.4425e-13	0	0.5	0	0.265914	SnO2	IC50 (uM)	6937.87	Escherichia coli	ATCC25254	N/A	16	N/A	None	None	21	PN	Gram+	RES	0	1	0	0	t	0.111111	-0.000666667	0.00233333	0.123904	0.0718737	0.0736966	-0.145194	-0.128959	-0.132032	-0.150341	0.00113226	0.00113226	150.709	14.7667	2.94667	3.09533	35	2		Sci. Total Environ. 2009 407 3070-3072"	COMPLEMENTARY	SnO2N/ANoneNoneN/A	Gram+RES
8	0	0	1.07538e-10	0	0.5	0	0.266048	SnO2	IC50 (uM)	6937.87	Escherichia coli	ATCC25254	N/A	16	N/A	None	None	24	ST	Gram+	RES	0	1	0	0	t	0.111111	0.00133333	0.00233333	0.124568	0.0735856	0.0748657	-0.145194	-0.128959	-0.132032	-0.150341	0.00113226	0.00113226	150.709	14.7667	2.94667	3.09533	35	2		Sci. Total Environ. 2009 407 3070-3072"	COMPLEMENTARY	SnO2N/ANoneNoneN/A	Gram+RES
8	0	0	0.13265	0	0.5	0	0.269716	SnO2	IC50 (uM)	6937.87	Escherichia coli	ATCC25254	N/A	16	N/A	None	None	8	EC	Gram-	GIT	0	1	0	1	t	0.111111	-0.004	-0.004	0.100485	0.00996768	0.0108964	-0.145194	-0.128959	-0.132032	-0.150341	0.00113226	0.00113226	150.709	14.7667	2.94667	3.09533	35	2		Sci. Total Environ. 2009 407 3070-3072"	COMPLEMENTARY	SnO2N/ANoneNoneN/A	Gram-GIT
8	0	0	8.4425e-13	0	0.5	0	0.265914	SnO2	IC50 (uM)	6937.87	Escherichia coli	ATCC25254	N/A	16	N/A	None	None	21	PN	Gram+	RES	0	1	0	0	t	0.111111	-0.000666667	0.00233333	0.123904	0.0718737	0.0736966	-0.145194	-0.128959	-0.132032	-0.150341	0.00113226	0.00113226	150.709	14.7667	2.94667	3.09533	35	2		Sci. Total Environ. 2009 407 3070-3072"	COMPLEMENTARY	SnO2N/ANoneNoneN/A	Gram+RES
8	0	0	1.07538e-10	0	0.5	0	0.266048	SnO2	IC50 (uM)	6937.87	Escherichia coli	ATCC25254	N/A	16	N/A	None	None	24	ST	Gram+	RES	0	1	0	0	t	0.111111	0.00133333	0.00233333	0.124568	0.0735856	0.0748657	-0.145194	-0.128959	-0.132032	-0.150341	0.00113226	0.00113226	150.709	14.7667	2.94667	3.09533	35	2		Sci. Total Environ. 2009 407 3070-3072"	COMPLEMENTARY	SnO2N/ANoneNoneN/A	Gram+RES
8	0	0	4.67907e-13	0	0.5	0	0.264895	SnO2	IC50 (uM)	6937.87	Escherichia coli	ATCC25254	N/A	16	N/A	None	None	20	PG	Gram-	SYS	0	1	0	0	t	0.111111	-0.00442857	-0.00142857	0.11973	0.0759019	0.0779623	-0.145194	-0.128959	-0.132032	-0.150341	0.00113226	0.00113226	150.709	14.7667	2.94667	3.09533	35	2		Sci. Total Environ. 2009 407 3070-3072"	COMPLEMENTARY	SnO2N/ANoneNoneN/A	Gram-SYS
8	0	0	2.91163e-12	0	0.5	0	0.265063	SnO2	IC50 (uM)	6937.87	Escherichia coli	ATCC25254	N/A	16	N/A	None	None	4	CJ	Gram-	GIT	0	1	0	0	t	0.111111	-0.002	0	0.122397	0.0791961	0.0807547	-0.145194	-0.128959	-0.132032	-0.150341	0.00113226	0.00113226	150.709	14.7667	2.94667	3.09533	35	2		Sci. Total Environ. 2009 407 3070-3072"	COMPLEMENTARY	SnO2N/ANoneNoneN/A	Gram-GIT
8	0	0	0.00706452	0	0.5	0	0.267132	SnO2	IC50 (uM)	6937.87	Escherichia coli	ATCC25254	N/A	16	N/A	None	None	16	MT	Gram-	RES	0	1	0	0	t	0.111111	-0.009	-0.01	0.0993988	0.0302842	0.0319897	-0.145194	-0.128959	-0.132032	-0.150341	0.00113226	0.00113226	150.709	14.7667	2.94667	3.09533	35	2		Sci. Total Environ. 2009 407 3070-3072"	COMPLEMENTARY	SnO2N/ANoneNoneN/A	Gram-RES
8	0	0	0.0267381	0	0.5	0	0.270196	SnO2	IC50 (uM)	6937.87	Escherichia coli	ATCC25254	N/A	16	N/A	None	None	25	TY	Gram+	SYS	0	1	0	0	t	0.111111	-0.0005	-0.0005	0.10259	0.0124517	0.0135345	-0.145194	-0.128959	-0.132032	-0.150341	0.00113226	0.00113226	150.709	14.7667	2.94667	3.09533	35	2		Sci. Total Environ. 2009 407 3070-3072"	COMPLEMENTARY	SnO2N/ANoneNoneN/A	Gram+SYS
8	0	0	0.00182094	0	0.5	0	0.268254	SnO2	IC50 (uM)	6937.87	Escherichia coli	ATCC25254	N/A	16	N/A	None	None	10	HI	Gram-	SYS	0	1	0	0	t	0.111111	0.00357143	0.000571429	0.114325	0.0458025	0.0470383	-0.145194	-0.128959	-0.132032	-0.150341	0.00113226	0.00113226	150.709	14.7667	2.94667	3.09533	35	2		Sci. Total Environ. 2009 407 3070-3072"	COMPLEMENTARY	SnO2N/ANoneNoneN/A	Gram-SYS
8	0	0	1.017e-15	0	0.5	0	0.263542	SnO2	IC50 (uM)	6937.87	Escherichia coli	ATCC25254	N/A	16	N/A	None	None	6	CT	Gram-	SYS	0	1	0	0	t	0.111111	0.00457143	0.00557143	0.129748	0.11685	0.11775	-0.145194	-0.128959	-0.132032	-0.150341	0.00113226	0.00113226	150.709	14.7667	2.94667	3.09533	35	2		Sci. Total Environ. 2009 407 3070-3072"	COMPLEMENTARY	SnO2N/ANoneNoneN/A	Gram-SYS
8	0	0	2.18233e-12	0	0.5	0	0.265181	SnO2	IC50 (uM)	6937.87	Escherichia coli	ATCC25254	N/A	16	N/A	None	None	9	EF	Gram+	GIT	0	1	0	0	t	0.111111	-0.004	-0.001	0.122096	0.0733832	0.0748523	-0.145194	-0.128959	-0.132032	-0.150341	0.00113226	0.00113226	150.709	14.7667	2.94667	3.09533	35	2		Sci. Total Environ. 2009 407 3070-3072"	COMPLEMENTARY	SnO2N/ANoneNoneN/A	Gram+GIT
9	0	0	0.132699	0	0.5	0	0.269716	TiO2	IC50 (uM)	13833.2	Escherichia coli	ATCC25254	N/A	16	N/A	None	None	8	EC	Gram-	GIT	0	1	0	1	t	0.111111	-0.004	-0.004	0.100485	0.00996768	0.0108964	-0.145193	-0.126057	-0.148467	-0.150341	0.00113226	0.00113226	79.866	12.88	2.80667	5.39533	35	2		Sci. Total Environ. 2009 407 3070-3072"	COMPLEMENTARY	TiO2N/ANoneNoneN/A	Gram-GIT
9	0	0	8.44611e-13	0	0.5	0	0.265914	TiO2	IC50 (uM)	13833.2	Escherichia coli	ATCC25254	N/A	16	N/A	None	None	21	PN	Gram+	RES	0	1	0	0	t	0.111111	-0.000666667	0.00233333	0.123904	0.0718737	0.0736966	-0.145193	-0.126057	-0.148467	-0.150341	0.00113226	0.00113226	79.866	12.88	2.80667	5.39533	35	2		Sci. Total Environ. 2009 407 3070-3072"	COMPLEMENTARY	TiO2N/ANoneNoneN/A	Gram+RES
9	0	0	1.07584e-10	0	0.5	0	0.266048	TiO2	IC50 (uM)	13833.2	Escherichia coli	ATCC25254	N/A	16	N/A	None	None	24	ST	Gram+	RES	0	1	0	0	t	0.111111	0.00133333	0.00233333	0.124568	0.0735856	0.0748657	-0.145193	-0.126057	-0.148467	-0.150341	0.00113226	0.00113226	79.866	12.88	2.80667	5.39533	35	2		Sci. Total Environ. 2009 407 3070-3072"	COMPLEMENTARY	TiO2N/ANoneNoneN/A	Gram+RES
9	0	0	0.132699	0	0.5	0	0.269716	TiO2	IC50 (uM)	13833.2	Escherichia coli	ATCC25254	N/A	16	N/A	None	None	8	EC	Gram-	GIT	0	1	0	1	t	0.111111	-0.004	-0.004	0.100485	0.00996768	0.0108964	-0.145193	-0.126057	-0.148467	-0.150341	0.00113226	0.00113226	79.866	12.88	2.80667	5.39533	35	2		Sci. Total Environ. 2009 407 3070-3072"	COMPLEMENTARY	TiO2N/ANoneNoneN/A	Gram-GIT
9	0	0	8.44611e-13	0	0.5	0	0.265914	TiO2	IC50 (uM)	13833.2	Escherichia coli	ATCC25254	N/A	16	N/A	None	None	21	PN	Gram+	RES	0	1	0	0	t	0.111111	-0.000666667	0.00233333	0.123904	0.0718737	0.0736966	-0.145193	-0.126057	-0.148467	-0.150341	0.00113226	0.00113226	79.866	12.88	2.80667	5.39533	35	2		Sci. Total Environ. 2009 407 3070-3072"	COMPLEMENTARY	TiO2N/ANoneNoneN/A	Gram+RES
9	0	0	1.07584e-10	0	0.5	0	0.266048	TiO2	IC50 (uM)	13833.2	Escherichia coli	ATCC25254	N/A	16	N/A	None	None	24	ST	Gram+	RES	0	1	0	0	t	0.111111	0.00133333	0.00233333	0.124568	0.0735856	0.0748657	-0.145193	-0.126057	-0.148467	-0.150341	0.00113226	0.00113226	79.866	12.88	2.80667	5.39533	35	2		Sci. Total Environ. 2009 407 3070-3072"	COMPLEMENTARY	TiO2N/ANoneNoneN/A	Gram+RES
9	0	0	0.00706752	0	0.5	0	0.267132	TiO2	IC50 (uM)	13833.2	Escherichia coli	ATCC25254	N/A	16	N/A	None	None	16	MT	Gram-	RES	0	1	0	0	t	0.111111	-0.009	-0.01	0.0993988	0.0302842	0.0319897	-0.145193	-0.126057	-0.148467	-0.150341	0.00113226	0.00113226	79.866	12.88	2.80667	5.39533	35	2		Sci. Total Environ. 2009 407 3070-3072"	COMPLEMENTARY	TiO2N/ANoneNoneN/A	Gram-RES
9	0	0	2.18327e-12	0	0.5	0	0.265181	TiO2	IC50 (uM)	13833.2	Escherichia coli	ATCC25254	N/A	16	N/A	None	None	9	EF	Gram+	GIT	0	1	0	0	t	0.111111	-0.004	-0.001	0.122096	0.0733832	0.0748523	-0.145193	-0.126057	-0.148467	-0.150341	0.00113226	0.00113226	79.866	12.88	2.80667	5.39533	35	2		Sci. Total Environ. 2009 407 3070-3072"	COMPLEMENTARY	TiO2N/ANoneNoneN/A	Gram+GIT
9	0	0	0.0267492	0	0.5	0	0.270196	TiO2	IC50 (uM)	13833.2	Escherichia coli	ATCC25254	N/A	16	N/A	None	None	25	TY	Gram+	SYS	0	1	0	0	t	0.111111	-0.0005	-0.0005	0.10259	0.0124517	0.0135345	-0.145193	-0.126057	-0.148467	-0.150341	0.00113226	0.00113226	79.866	12.88	2.80667	5.39533	35	2		Sci. Total Environ. 2009 407 3070-3072"	COMPLEMENTARY	TiO2N/ANoneNoneN/A	Gram+SYS
9	0	0	0.00182171	0	0.5	0	0.268254	TiO2	IC50 (uM)	13833.2	Escherichia coli	ATCC25254	N/A	16	N/A	None	None	10	HI	Gram-	SYS	0	1	0	0	t	0.111111	0.00357143	0.000571429	0.114325	0.0458025	0.0470383	-0.145193	-0.126057	-0.148467	-0.150341	0.00113226	0.00113226	79.866	12.88	2.80667	5.39533	35	2		Sci. Total Environ. 2009 407 3070-3072"	COMPLEMENTARY	TiO2N/ANoneNoneN/A	Gram-SYS
9	0	0	4.68107e-13	0	0.5	0	0.264895	TiO2	IC50 (uM)	13833.2	Escherichia coli	ATCC25254	N/A	16	N/A	None	None	20	PG	Gram-	SYS	0	1	0	0	t	0.111111	-0.00442857	-0.00142857	0.11973	0.0759019	0.0779623	-0.145193	-0.126057	-0.148467	-0.150341	0.00113226	0.00113226	79.866	12.88	2.80667	5.39533	35	2		Sci. Total Environ. 2009 407 3070-3072"	COMPLEMENTARY	TiO2N/ANoneNoneN/A	Gram-SYS
9	0	0	1.01744e-15	0	0.5	0	0.263542	TiO2	IC50 (uM)	13833.2	Escherichia coli	ATCC25254	N/A	16	N/A	None	None	6	CT	Gram-	SYS	0	1	0	0	t	0.111111	0.00457143	0.00557143	0.129748	0.11685	0.11775	-0.145193	-0.126057	-0.148467	-0.150341	0.00113226	0.00113226	79.866	12.88	2.80667	5.39533	35	2		Sci. Total Environ. 2009 407 3070-3072"	COMPLEMENTARY	TiO2N/ANoneNoneN/A	Gram-SYS
10	1	1	0.698924	1	0.731059	0	0.270447	Au	MBC (uM)	10.154	Escherichia coli	ATCC11775	Spherical	1	PDT/Mel	Double	Monomer	8	EC	Gram-	GIT	1	1	1	1	t	0.447154	-0.004	-0.004	0.100485	0.00996768	0.0108964	-0.142944	-0.119615	-0.149459	-0.0932976	-0.000738822	-0.000738822	196.967	10.2	2.54	6.1	1.8	24	SC1=NC(N)=CC(N)=N1.c1(nc(nc(n1)N)N)N	J. Am. Chem. Soc. 2013 135 (35) 12940â€“12943"	COMPLEMENTARY	AuSphericalDoubleMonomerPDT/Mel	Gram-GIT
10	1	1	0.698924	1	0.731059	0	0.270447	Au	MBC (uM)	10.154	Escherichia coli	ATCC11775	Spherical	1	PDT/Mel	Double	Monomer	8	EC	Gram-	GIT	1	1	1	1	t	0.447154	-0.004	-0.004	0.100485	0.00996768	0.0108964	-0.142944	-0.119615	-0.149459	-0.0932976	-0.000738822	-0.000738822	196.967	10.2	2.54	6.1	1.8	24	SC1=NC(N)=CC(N)=N1.c1(nc(nc(n1)N)N)N	J. Am. Chem. Soc. 2013 135 (35) 12940â€“12943"	COMPLEMENTARY	AuSphericalDoubleMonomerPDT/Mel	Gram-GIT
10	0	0	1.28148e-11	0	0.5	0	0.266718	Au	MBC (uM)	10.154	Escherichia coli	ATCC11775	Spherical	1	PDT/Mel	Double	Monomer	21	PN	Gram+	RES	0	1	1	0	t	0.447154	-0.000666667	0.00233333	0.123904	0.0718737	0.0736966	-0.142944	-0.119615	-0.149459	-0.0932976	-0.000738822	-0.000738822	196.967	10.2	2.54	6.1	1.8	24	SC1=NC(N)=CC(N)=N1.c1(nc(nc(n1)N)N)N	J. Am. Chem. Soc. 2013 135 (35) 12940â€“12943"	COMPLEMENTARY	AuSphericalDoubleMonomerPDT/Mel	Gram+RES
10	0	0	1.63231e-09	0	0.5	0	0.266874	Au	MBC (uM)	10.154	Escherichia coli	ATCC11775	Spherical	1	PDT/Mel	Double	Monomer	24	ST	Gram+	RES	0	1	1	0	t	0.447154	0.00133333	0.00233333	0.124568	0.0735856	0.0748657	-0.142944	-0.119615	-0.149459	-0.0932976	-0.000738822	-0.000738822	196.967	10.2	2.54	6.1	1.8	24	SC1=NC(N)=CC(N)=N1.c1(nc(nc(n1)N)N)N	J. Am. Chem. Soc. 2013 135 (35) 12940â€“12943"	COMPLEMENTARY	AuSphericalDoubleMonomerPDT/Mel	Gram+RES
10	0	0	1.28148e-11	0	0.5	0	0.266718	Au	MBC (uM)	10.154	Escherichia coli	ATCC11775	Spherical	1	PDT/Mel	Double	Monomer	21	PN	Gram+	RES	0	1	1	0	t	0.447154	-0.000666667	0.00233333	0.123904	0.0718737	0.0736966	-0.142944	-0.119615	-0.149459	-0.0932976	-0.000738822	-0.000738822	196.967	10.2	2.54	6.1	1.8	24	SC1=NC(N)=CC(N)=N1.c1(nc(nc(n1)N)N)N	J. Am. Chem. Soc. 2013 135 (35) 12940â€“12943"	COMPLEMENTARY	AuSphericalDoubleMonomerPDT/Mel	Gram+RES
10	0	0	1.63231e-09	0	0.5	0	0.266874	Au	MBC (uM)	10.154	Escherichia coli	ATCC11775	Spherical	1	PDT/Mel	Double	Monomer	24	ST	Gram+	RES	0	1	1	0	t	0.447154	0.00133333	0.00233333	0.124568	0.0735856	0.0748657	-0.142944	-0.119615	-0.149459	-0.0932976	-0.000738822	-0.000738822	196.967	10.2	2.54	6.1	1.8	24	SC1=NC(N)=CC(N)=N1.c1(nc(nc(n1)N)N)N	J. Am. Chem. Soc. 2013 135 (35) 12940â€“12943"	COMPLEMENTARY	AuSphericalDoubleMonomerPDT/Mel	Gram+RES
10	1	1	0.698924	1	0.731059	0	0.270447	Au	MBC (uM)	10.154	Escherichia coli	ATCC11775	Spherical	1	PDT/Mel	Double	Monomer	8	EC	Gram-	GIT	1	1	1	1	t	0.447154	-0.004	-0.004	0.100485	0.00996768	0.0108964	-0.142944	-0.119615	-0.149459	-0.0932976	-0.000738822	-0.000738822	196.967	10.2	2.54	6.1	1.8	24	SC1=NC(N)=CC(N)=N1.c1(nc(nc(n1)N)N)N	J. Am. Chem. Soc. 2013 135 (35) 12940â€“12943"	COMPLEMENTARY	AuSphericalDoubleMonomerPDT/Mel	Gram-GIT
10	0	0	0.0974688	0	0.5	0	0.267764	Au	MBC (uM)	10.154	Escherichia coli	ATCC11775	Spherical	1	PDT/Mel	Double	Monomer	16	MT	Gram-	RES	0	1	1	0	t	0.447154	-0.009	-0.01	0.0993988	0.0302842	0.0319897	-0.142944	-0.119615	-0.149459	-0.0932976	-0.000738822	-0.000738822	196.967	10.2	2.54	6.1	1.8	24	SC1=NC(N)=CC(N)=N1.c1(nc(nc(n1)N)N)N	J. Am. Chem. Soc. 2013 135 (35) 12940â€“12943"	COMPLEMENTARY	AuSphericalDoubleMonomerPDT/Mel	Gram-RES
10	1	1	0.698924	1	0.731059	0	0.270447	Au	MBC (uM)	10.154	Escherichia coli	ATCC11775	Spherical	1	PDT/Mel	Double	Monomer	8	EC	Gram-	GIT	1	1	1	1	t	0.447154	-0.004	-0.004	0.100485	0.00996768	0.0108964	-0.142944	-0.119615	-0.149459	-0.0932976	-0.000738822	-0.000738822	196.967	10.2	2.54	6.1	1.8	24	SC1=NC(N)=CC(N)=N1.c1(nc(nc(n1)N)N)N	J. Am. Chem. Soc. 2013 135 (35) 12940â€“12943"	COMPLEMENTARY	AuSphericalDoubleMonomerPDT/Mel	Gram-GIT
10	0	0	7.10233e-12	0	0.5	0	0.265631	Au	MBC (uM)	10.154	Escherichia coli	ATCC11775	Spherical	1	PDT/Mel	Double	Monomer	20	PG	Gram-	SYS	0	1	1	0	t	0.447154	-0.00442857	-0.00142857	0.11973	0.0759019	0.0779623	-0.142944	-0.119615	-0.149459	-0.0932976	-0.000738822	-0.000738822	196.967	10.2	2.54	6.1	1.8	24	SC1=NC(N)=CC(N)=N1.c1(nc(nc(n1)N)N)N	J. Am. Chem. Soc. 2013 135 (35) 12940â€“12943"	COMPLEMENTARY	AuSphericalDoubleMonomerPDT/Mel	Gram-SYS
10	0	0	3.31255e-11	0	0.5	0	0.265925	Au	MBC (uM)	10.154	Escherichia coli	ATCC11775	Spherical	1	PDT/Mel	Double	Monomer	9	EF	Gram+	GIT	0	1	1	0	t	0.447154	-0.004	-0.001	0.122096	0.0733832	0.0748523	-0.142944	-0.119615	-0.149459	-0.0932976	-0.000738822	-0.000738822	196.967	10.2	2.54	6.1	1.8	24	SC1=NC(N)=CC(N)=N1.c1(nc(nc(n1)N)N)N	J. Am. Chem. Soc. 2013 135 (35) 12940â€“12943"	COMPLEMENTARY	AuSphericalDoubleMonomerPDT/Mel	Gram+GIT
10	0	0	0.294287	0	0.5	0	0.270991	Au	MBC (uM)	10.154	Escherichia coli	ATCC11775	Spherical	1	PDT/Mel	Double	Monomer	25	TY	Gram+	SYS	0	1	1	0	t	0.447154	-0.0005	-0.0005	0.10259	0.0124517	0.0135345	-0.142944	-0.119615	-0.149459	-0.0932976	-0.000738822	-0.000738822	196.967	10.2	2.54	6.1	1.8	24	SC1=NC(N)=CC(N)=N1.c1(nc(nc(n1)N)N)N	J. Am. Chem. Soc. 2013 135 (35) 12940â€“12943"	COMPLEMENTARY	AuSphericalDoubleMonomerPDT/Mel	Gram+SYS
10	0	0	0.0269442	0	0.5	0	0.269099	Au	MBC (uM)	10.154	Escherichia coli	ATCC11775	Spherical	1	PDT/Mel	Double	Monomer	10	HI	Gram-	SYS	0	1	1	0	t	0.447154	0.00357143	0.000571429	0.114325	0.0458025	0.0470383	-0.142944	-0.119615	-0.149459	-0.0932976	-0.000738822	-0.000738822	196.967	10.2	2.54	6.1	1.8	24	SC1=NC(N)=CC(N)=N1.c1(nc(nc(n1)N)N)N	J. Am. Chem. Soc. 2013 135 (35) 12940â€“12943"	COMPLEMENTARY	AuSphericalDoubleMonomerPDT/Mel	Gram-SYS
10	0	0	1.5437e-14	0	0.5	0	0.264417	Au	MBC (uM)	10.154	Escherichia coli	ATCC11775	Spherical	1	PDT/Mel	Double	Monomer	6	CT	Gram-	SYS	0	1	1	0	t	0.447154	0.00457143	0.00557143	0.129748	0.11685	0.11775	-0.142944	-0.119615	-0.149459	-0.0932976	-0.000738822	-0.000738822	196.967	10.2	2.54	6.1	1.8	24	SC1=NC(N)=CC(N)=N1.c1(nc(nc(n1)N)N)N	J. Am. Chem. Soc. 2013 135 (35) 12940â€“12943"	COMPLEMENTARY	AuSphericalDoubleMonomerPDT/Mel	Gram-SYS
10	0	0	4.41955e-11	0	0.5	0	0.265835	Au	MBC (uM)	10.154	Escherichia coli	ATCC11775	Spherical	1	PDT/Mel	Double	Monomer	4	CJ	Gram-	GIT	0	1	1	0	t	0.447154	-0.002	0	0.122397	0.0791961	0.0807547	-0.142944	-0.119615	-0.149459	-0.0932976	-0.000738822	-0.000738822	196.967	10.2	2.54	6.1	1.8	24	SC1=NC(N)=CC(N)=N1.c1(nc(nc(n1)N)N)N	J. Am. Chem. Soc. 2013 135 (35) 12940â€“12943"	COMPLEMENTARY	AuSphericalDoubleMonomerPDT/Mel	Gram-GIT
11	0	0	4.41955e-11	0	0.5	0	0.265835	Au	MBC (uM)	10.154	Escherichia coli	MDR	Spherical	1	PDT/Mel	Double	Monomer	4	CJ	Gram-	GIT	0	1	1	0	t	0.447154	-0.002	0	0.122397	0.0791961	0.0807547	-0.142944	-0.119615	-0.149459	-0.0932976	-0.000738822	-0.000738822	196.967	10.2	2.54	6.1	1.8	24	SC1=NC(N)=CC(N)=N1.c1(nc(nc(n1)N)N)N	J. Am. Chem. Soc. 2013 135 (35) 12940â€“12943"	COMPLEMENTARY	AuSphericalDoubleMonomerPDT/Mel	Gram-GIT
11	1	1	0.698924	1	0.731059	0	0.270447	Au	MBC (uM)	10.154	Escherichia coli	MDR	Spherical	1	PDT/Mel	Double	Monomer	8	EC	Gram-	GIT	1	1	1	1	t	0.447154	-0.004	-0.004	0.100485	0.00996768	0.0108964	-0.142944	-0.119615	-0.149459	-0.0932976	-0.000738822	-0.000738822	196.967	10.2	2.54	6.1	1.8	24	SC1=NC(N)=CC(N)=N1.c1(nc(nc(n1)N)N)N	J. Am. Chem. Soc. 2013 135 (35) 12940â€“12943"	COMPLEMENTARY	AuSphericalDoubleMonomerPDT/Mel	Gram-GIT
11	1	1	0.698924	1	0.731059	0	0.270447	Au	MBC (uM)	10.154	Escherichia coli	MDR	Spherical	1	PDT/Mel	Double	Monomer	8	EC	Gram-	GIT	1	1	1	1	t	0.447154	-0.004	-0.004	0.100485	0.00996768	0.0108964	-0.142944	-0.119615	-0.149459	-0.0932976	-0.000738822	-0.000738822	196.967	10.2	2.54	6.1	1.8	24	SC1=NC(N)=CC(N)=N1.c1(nc(nc(n1)N)N)N	J. Am. Chem. Soc. 2013 135 (35) 12940â€“12943"	COMPLEMENTARY	AuSphericalDoubleMonomerPDT/Mel	Gram-GIT
11	0	0	1.28148e-11	0	0.5	0	0.266718	Au	MBC (uM)	10.154	Escherichia coli	MDR	Spherical	1	PDT/Mel	Double	Monomer	21	PN	Gram+	RES	0	1	1	0	t	0.447154	-0.000666667	0.00233333	0.123904	0.0718737	0.0736966	-0.142944	-0.119615	-0.149459	-0.0932976	-0.000738822	-0.000738822	196.967	10.2	2.54	6.1	1.8	24	SC1=NC(N)=CC(N)=N1.c1(nc(nc(n1)N)N)N	J. Am. Chem. Soc. 2013 135 (35) 12940â€“12943"	COMPLEMENTARY	AuSphericalDoubleMonomerPDT/Mel	Gram+RES
11	0	0	1.63231e-09	0	0.5	0	0.266874	Au	MBC (uM)	10.154	Escherichia coli	MDR	Spherical	1	PDT/Mel	Double	Monomer	24	ST	Gram+	RES	0	1	1	0	t	0.447154	0.00133333	0.00233333	0.124568	0.0735856	0.0748657	-0.142944	-0.119615	-0.149459	-0.0932976	-0.000738822	-0.000738822	196.967	10.2	2.54	6.1	1.8	24	SC1=NC(N)=CC(N)=N1.c1(nc(nc(n1)N)N)N	J. Am. Chem. Soc. 2013 135 (35) 12940â€“12943"	COMPLEMENTARY	AuSphericalDoubleMonomerPDT/Mel	Gram+RES
11	0	0	7.10233e-12	0	0.5	0	0.265631	Au	MBC (uM)	10.154	Escherichia coli	MDR	Spherical	1	PDT/Mel	Double	Monomer	20	PG	Gram-	SYS	0	1	1	0	t	0.447154	-0.00442857	-0.00142857	0.11973	0.0759019	0.0779623	-0.142944	-0.119615	-0.149459	-0.0932976	-0.000738822	-0.000738822	196.967	10.2	2.54	6.1	1.8	24	SC1=NC(N)=CC(N)=N1.c1(nc(nc(n1)N)N)N	J. Am. Chem. Soc. 2013 135 (35) 12940â€“12943"	COMPLEMENTARY	AuSphericalDoubleMonomerPDT/Mel	Gram-SYS
11	1	1	0.698924	1	0.731059	0	0.270447	Au	MBC (uM)	10.154	Escherichia coli	MDR	Spherical	1	PDT/Mel	Double	Monomer	8	EC	Gram-	GIT	1	1	1	1	t	0.447154	-0.004	-0.004	0.100485	0.00996768	0.0108964	-0.142944	-0.119615	-0.149459	-0.0932976	-0.000738822	-0.000738822	196.967	10.2	2.54	6.1	1.8	24	SC1=NC(N)=CC(N)=N1.c1(nc(nc(n1)N)N)N	J. Am. Chem. Soc. 2013 135 (35) 12940â€“12943"	COMPLEMENTARY	AuSphericalDoubleMonomerPDT/Mel	Gram-GIT
11	0	0	0.294287	0	0.5	0	0.270991	Au	MBC (uM)	10.154	Escherichia coli	MDR	Spherical	1	PDT/Mel	Double	Monomer	25	TY	Gram+	SYS	0	1	1	0	t	0.447154	-0.0005	-0.0005	0.10259	0.0124517	0.0135345	-0.142944	-0.119615	-0.149459	-0.0932976	-0.000738822	-0.000738822	196.967	10.2	2.54	6.1	1.8	24	SC1=NC(N)=CC(N)=N1.c1(nc(nc(n1)N)N)N	J. Am. Chem. Soc. 2013 135 (35) 12940â€“12943"	COMPLEMENTARY	AuSphericalDoubleMonomerPDT/Mel	Gram+SYS
11	0	0	1.28148e-11	0	0.5	0	0.266718	Au	MBC (uM)	10.154	Escherichia coli	MDR	Spherical	1	PDT/Mel	Double	Monomer	21	PN	Gram+	RES	0	1	1	0	t	0.447154	-0.000666667	0.00233333	0.123904	0.0718737	0.0736966	-0.142944	-0.119615	-0.149459	-0.0932976	-0.000738822	-0.000738822	196.967	10.2	2.54	6.1	1.8	24	SC1=NC(N)=CC(N)=N1.c1(nc(nc(n1)N)N)N	J. Am. Chem. Soc. 2013 135 (35) 12940â€“12943"	COMPLEMENTARY	AuSphericalDoubleMonomerPDT/Mel	Gram+RES
11	1	1	0.698924	1	0.731059	0	0.270447	Au	MBC (uM)	10.154	Escherichia coli	MDR	Spherical	1	PDT/Mel	Double	Monomer	8	EC	Gram-	GIT	1	1	1	1	t	0.447154	-0.004	-0.004	0.100485	0.00996768	0.0108964	-0.142944	-0.119615	-0.149459	-0.0932976	-0.000738822	-0.000738822	196.967	10.2	2.54	6.1	1.8	24	SC1=NC(N)=CC(N)=N1.c1(nc(nc(n1)N)N)N	J. Am. Chem. Soc. 2013 135 (35) 12940â€“12943"	COMPLEMENTARY	AuSphericalDoubleMonomerPDT/Mel	Gram-GIT
11	0	0	0.0974688	0	0.5	0	0.267764	Au	MBC (uM)	10.154	Escherichia coli	MDR	Spherical	1	PDT/Mel	Double	Monomer	16	MT	Gram-	RES	0	1	1	0	t	0.447154	-0.009	-0.01	0.0993988	0.0302842	0.0319897	-0.142944	-0.119615	-0.149459	-0.0932976	-0.000738822	-0.000738822	196.967	10.2	2.54	6.1	1.8	24	SC1=NC(N)=CC(N)=N1.c1(nc(nc(n1)N)N)N	J. Am. Chem. Soc. 2013 135 (35) 12940â€“12943"	COMPLEMENTARY	AuSphericalDoubleMonomerPDT/Mel	Gram-RES
11	0	0	0.0269442	0	0.5	0	0.269099	Au	MBC (uM)	10.154	Escherichia coli	MDR	Spherical	1	PDT/Mel	Double	Monomer	10	HI	Gram-	SYS	0	1	1	0	t	0.447154	0.00357143	0.000571429	0.114325	0.0458025	0.0470383	-0.142944	-0.119615	-0.149459	-0.0932976	-0.000738822	-0.000738822	196.967	10.2	2.54	6.1	1.8	24	SC1=NC(N)=CC(N)=N1.c1(nc(nc(n1)N)N)N	J. Am. Chem. Soc. 2013 135 (35) 12940â€“12943"	COMPLEMENTARY	AuSphericalDoubleMonomerPDT/Mel	Gram-SYS
11	0	1	0.851546	1	0.731059	0	0.271616	Au	MBC (uM)	10.154	Escherichia coli	MDR	Spherical	1	PDT/Mel	Double	Monomer	19	PA	Gram-	SYS	0	1	1	0	t	0.447154	0.00657143	0.00357143	0.102611	0.0205758	0.0222078	-0.142944	-0.119615	-0.149459	-0.0932976	-0.000738822	-0.000738822	196.967	10.2	2.54	6.1	1.8	24	SC1=NC(N)=CC(N)=N1.c1(nc(nc(n1)N)N)N	J. Am. Chem. Soc. 2013 135 (35) 12940â€“12943"	COMPLEMENTARY	AuSphericalDoubleMonomerPDT/Mel	Gram-SYS
11	0	0	3.31255e-11	0	0.5	0	0.265925	Au	MBC (uM)	10.154	Escherichia coli	MDR	Spherical	1	PDT/Mel	Double	Monomer	9	EF	Gram+	GIT	0	1	1	0	t	0.447154	-0.004	-0.001	0.122096	0.0733832	0.0748523	-0.142944	-0.119615	-0.149459	-0.0932976	-0.000738822	-0.000738822	196.967	10.2	2.54	6.1	1.8	24	SC1=NC(N)=CC(N)=N1.c1(nc(nc(n1)N)N)N	J. Am. Chem. Soc. 2013 135 (35) 12940â€“12943"	COMPLEMENTARY	AuSphericalDoubleMonomerPDT/Mel	Gram+GIT
12	0	0	0.294287	0	0.5	0	0.270991	Au	MBC (uM)	10.154	Klebsiella pneumoniae	MDR	Spherical	1	PDT/Mel	Double	Monomer	25	TY	Gram+	SYS	0	1	1	0	t	0.447154	-0.0005	-0.0005	0.10259	0.0124517	0.0135345	-0.142944	-0.119615	-0.149459	-0.0932976	-0.000738822	-0.000738822	196.967	10.2	2.54	6.1	1.8	24	SC1=NC(N)=CC(N)=N1.c1(nc(nc(n1)N)N)N	J. Am. Chem. Soc. 2013 135 (35) 12940â€“12943"	COMPLEMENTARY	AuSphericalDoubleMonomerPDT/Mel	Gram+SYS
12	0	0	0.0974688	0	0.5	0	0.267764	Au	MBC (uM)	10.154	Klebsiella pneumoniae	MDR	Spherical	1	PDT/Mel	Double	Monomer	16	MT	Gram-	RES	0	1	1	0	t	0.447154	-0.009	-0.01	0.0993988	0.0302842	0.0319897	-0.142944	-0.119615	-0.149459	-0.0932976	-0.000738822	-0.000738822	196.967	10.2	2.54	6.1	1.8	24	SC1=NC(N)=CC(N)=N1.c1(nc(nc(n1)N)N)N	J. Am. Chem. Soc. 2013 135 (35) 12940â€“12943"	COMPLEMENTARY	AuSphericalDoubleMonomerPDT/Mel	Gram-RES
12	0	0	0.294287	0	0.5	0	0.270991	Au	MBC (uM)	10.154	Klebsiella pneumoniae	MDR	Spherical	1	PDT/Mel	Double	Monomer	25	TY	Gram+	SYS	0	1	1	0	t	0.447154	-0.0005	-0.0005	0.10259	0.0124517	0.0135345	-0.142944	-0.119615	-0.149459	-0.0932976	-0.000738822	-0.000738822	196.967	10.2	2.54	6.1	1.8	24	SC1=NC(N)=CC(N)=N1.c1(nc(nc(n1)N)N)N	J. Am. Chem. Soc. 2013 135 (35) 12940â€“12943"	COMPLEMENTARY	AuSphericalDoubleMonomerPDT/Mel	Gram+SYS
12	0	0	0.0269442	0	0.5	0	0.269099	Au	MBC (uM)	10.154	Klebsiella pneumoniae	MDR	Spherical	1	PDT/Mel	Double	Monomer	10	HI	Gram-	SYS	0	1	1	0	t	0.447154	0.00357143	0.000571429	0.114325	0.0458025	0.0470383	-0.142944	-0.119615	-0.149459	-0.0932976	-0.000738822	-0.000738822	196.967	10.2	2.54	6.1	1.8	24	SC1=NC(N)=CC(N)=N1.c1(nc(nc(n1)N)N)N	J. Am. Chem. Soc. 2013 135 (35) 12940â€“12943"	COMPLEMENTARY	AuSphericalDoubleMonomerPDT/Mel	Gram-SYS
12	0	0	1.63231e-09	0	0.5	0	0.266874	Au	MBC (uM)	10.154	Klebsiella pneumoniae	MDR	Spherical	1	PDT/Mel	Double	Monomer	24	ST	Gram+	RES	0	1	1	0	t	0.447154	0.00133333	0.00233333	0.124568	0.0735856	0.0748657	-0.142944	-0.119615	-0.149459	-0.0932976	-0.000738822	-0.000738822	196.967	10.2	2.54	6.1	1.8	24	SC1=NC(N)=CC(N)=N1.c1(nc(nc(n1)N)N)N	J. Am. Chem. Soc. 2013 135 (35) 12940â€“12943"	COMPLEMENTARY	AuSphericalDoubleMonomerPDT/Mel	Gram+RES
12	0	0	1.5437e-14	0	0.5	0	0.264417	Au	MBC (uM)	10.154	Klebsiella pneumoniae	MDR	Spherical	1	PDT/Mel	Double	Monomer	6	CT	Gram-	SYS	0	1	1	0	t	0.447154	0.00457143	0.00557143	0.129748	0.11685	0.11775	-0.142944	-0.119615	-0.149459	-0.0932976	-0.000738822	-0.000738822	196.967	10.2	2.54	6.1	1.8	24	SC1=NC(N)=CC(N)=N1.c1(nc(nc(n1)N)N)N	J. Am. Chem. Soc. 2013 135 (35) 12940â€“12943"	COMPLEMENTARY	AuSphericalDoubleMonomerPDT/Mel	Gram-SYS
12	0	0	4.41955e-11	0	0.5	0	0.265835	Au	MBC (uM)	10.154	Klebsiella pneumoniae	MDR	Spherical	1	PDT/Mel	Double	Monomer	4	CJ	Gram-	GIT	0	1	1	0	t	0.447154	-0.002	0	0.122397	0.0791961	0.0807547	-0.142944	-0.119615	-0.149459	-0.0932976	-0.000738822	-0.000738822	196.967	10.2	2.54	6.1	1.8	24	SC1=NC(N)=CC(N)=N1.c1(nc(nc(n1)N)N)N	J. Am. Chem. Soc. 2013 135 (35) 12940â€“12943"	COMPLEMENTARY	AuSphericalDoubleMonomerPDT/Mel	Gram-GIT
13	1	1	0.619251	1	0.731059	0	0.269988	Au	MBC (uM)	10.154	Escherichia coli	ATCC11775	Spherical	2	PDT/ACh	Double	Monomer	8	EC	Gram-	GIT	1	1	1	1	t	0.447154	-0.004	-0.004	0.100485	0.00996768	0.0108964	-0.142944	-0.119615	-0.149459	-0.109226	-0.000738822	-0.000738822	196.967	10.2	2.54	6.1	2.2	24	SC1=NC(N)=CC(N)=N1.CC(=O)OCC[N+](C)(C)C	J. Am. Chem. Soc. 2013 135 (35) 12940â€“12943"	COMPLEMENTARY	AuSphericalDoubleMonomerPDT/ACh	Gram-GIT
13	1	1	0.619251	1	0.731059	0	0.269988	Au	MBC (uM)	10.154	Escherichia coli	ATCC11775	Spherical	2	PDT/ACh	Double	Monomer	8	EC	Gram-	GIT	1	1	1	1	t	0.447154	-0.004	-0.004	0.100485	0.00996768	0.0108964	-0.142944	-0.119615	-0.149459	-0.109226	-0.000738822	-0.000738822	196.967	10.2	2.54	6.1	2.2	24	SC1=NC(N)=CC(N)=N1.CC(=O)OCC[N+](C)(C)C	J. Am. Chem. Soc. 2013 135 (35) 12940â€“12943"	COMPLEMENTARY	AuSphericalDoubleMonomerPDT/ACh	Gram-GIT
13	0	0	8.97815e-12	0	0.5	0	0.266271	Au	MBC (uM)	10.154	Escherichia coli	ATCC11775	Spherical	2	PDT/ACh	Double	Monomer	21	PN	Gram+	RES	0	1	1	0	t	0.447154	-0.000666667	0.00233333	0.123904	0.0718737	0.0736966	-0.142944	-0.119615	-0.149459	-0.109226	-0.000738822	-0.000738822	196.967	10.2	2.54	6.1	2.2	24	SC1=NC(N)=CC(N)=N1.CC(=O)OCC[N+](C)(C)C	J. Am. Chem. Soc. 2013 135 (35) 12940â€“12943"	COMPLEMENTARY	AuSphericalDoubleMonomerPDT/ACh	Gram+RES
13	0	0	1.14361e-09	0	0.5	0	0.266427	Au	MBC (uM)	10.154	Escherichia coli	ATCC11775	Spherical	2	PDT/ACh	Double	Monomer	24	ST	Gram+	RES	0	1	1	0	t	0.447154	0.00133333	0.00233333	0.124568	0.0735856	0.0748657	-0.142944	-0.119615	-0.149459	-0.109226	-0.000738822	-0.000738822	196.967	10.2	2.54	6.1	2.2	24	SC1=NC(N)=CC(N)=N1.CC(=O)OCC[N+](C)(C)C	J. Am. Chem. Soc. 2013 135 (35) 12940â€“12943"	COMPLEMENTARY	AuSphericalDoubleMonomerPDT/ACh	Gram+RES
13	0	0	8.97815e-12	0	0.5	0	0.266271	Au	MBC (uM)	10.154	Escherichia coli	ATCC11775	Spherical	2	PDT/ACh	Double	Monomer	21	PN	Gram+	RES	0	1	1	0	t	0.447154	-0.000666667	0.00233333	0.123904	0.0718737	0.0736966	-0.142944	-0.119615	-0.149459	-0.109226	-0.000738822	-0.000738822	196.967	10.2	2.54	6.1	2.2	24	SC1=NC(N)=CC(N)=N1.CC(=O)OCC[N+](C)(C)C	J. Am. Chem. Soc. 2013 135 (35) 12940â€“12943"	COMPLEMENTARY	AuSphericalDoubleMonomerPDT/ACh	Gram+RES
13	0	0	1.14361e-09	0	0.5	0	0.266427	Au	MBC (uM)	10.154	Escherichia coli	ATCC11775	Spherical	2	PDT/ACh	Double	Monomer	24	ST	Gram+	RES	0	1	1	0	t	0.447154	0.00133333	0.00233333	0.124568	0.0735856	0.0748657	-0.142944	-0.119615	-0.149459	-0.109226	-0.000738822	-0.000738822	196.967	10.2	2.54	6.1	2.2	24	SC1=NC(N)=CC(N)=N1.CC(=O)OCC[N+](C)(C)C	J. Am. Chem. Soc. 2013 135 (35) 12940â€“12943"	COMPLEMENTARY	AuSphericalDoubleMonomerPDT/ACh	Gram+RES
13	1	1	0.619251	1	0.731059	0	0.269988	Au	MBC (uM)	10.154	Escherichia coli	ATCC11775	Spherical	2	PDT/ACh	Double	Monomer	8	EC	Gram-	GIT	1	1	1	1	t	0.447154	-0.004	-0.004	0.100485	0.00996768	0.0108964	-0.142944	-0.119615	-0.149459	-0.109226	-0.000738822	-0.000738822	196.967	10.2	2.54	6.1	2.2	24	SC1=NC(N)=CC(N)=N1.CC(=O)OCC[N+](C)(C)C	J. Am. Chem. Soc. 2013 135 (35) 12940â€“12943"	COMPLEMENTARY	AuSphericalDoubleMonomerPDT/ACh	Gram-GIT
13	0	0	4.97594e-12	0	0.5	0	0.265186	Au	MBC (uM)	10.154	Escherichia coli	ATCC11775	Spherical	2	PDT/ACh	Double	Monomer	20	PG	Gram-	SYS	0	1	1	0	t	0.447154	-0.00442857	-0.00142857	0.11973	0.0759019	0.0779623	-0.142944	-0.119615	-0.149459	-0.109226	-0.000738822	-0.000738822	196.967	10.2	2.54	6.1	2.2	24	SC1=NC(N)=CC(N)=N1.CC(=O)OCC[N+](C)(C)C	J. Am. Chem. Soc. 2013 135 (35) 12940â€“12943"	COMPLEMENTARY	AuSphericalDoubleMonomerPDT/ACh	Gram-SYS
13	0	0	2.3208e-11	0	0.5	0	0.265479	Au	MBC (uM)	10.154	Escherichia coli	ATCC11775	Spherical	2	PDT/ACh	Double	Monomer	9	EF	Gram+	GIT	0	1	1	0	t	0.447154	-0.004	-0.001	0.122096	0.0733832	0.0748523	-0.142944	-0.119615	-0.149459	-0.109226	-0.000738822	-0.000738822	196.967	10.2	2.54	6.1	2.2	24	SC1=NC(N)=CC(N)=N1.CC(=O)OCC[N+](C)(C)C	J. Am. Chem. Soc. 2013 135 (35) 12940â€“12943"	COMPLEMENTARY	AuSphericalDoubleMonomerPDT/ACh	Gram+GIT
13	0	0	0.0703399	0	0.5	0	0.26731	Au	MBC (uM)	10.154	Escherichia coli	ATCC11775	Spherical	2	PDT/ACh	Double	Monomer	16	MT	Gram-	RES	0	1	1	0	t	0.447154	-0.009	-0.01	0.0993988	0.0302842	0.0319897	-0.142944	-0.119615	-0.149459	-0.109226	-0.000738822	-0.000738822	196.967	10.2	2.54	6.1	2.2	24	SC1=NC(N)=CC(N)=N1.CC(=O)OCC[N+](C)(C)C	J. Am. Chem. Soc. 2013 135 (35) 12940â€“12943"	COMPLEMENTARY	AuSphericalDoubleMonomerPDT/ACh	Gram-RES
13	0	0	0.0190308	0	0.5	0	0.268645	Au	MBC (uM)	10.154	Escherichia coli	ATCC11775	Spherical	2	PDT/ACh	Double	Monomer	10	HI	Gram-	SYS	0	1	1	0	t	0.447154	0.00357143	0.000571429	0.114325	0.0458025	0.0470383	-0.142944	-0.119615	-0.149459	-0.109226	-0.000738822	-0.000738822	196.967	10.2	2.54	6.1	2.2	24	SC1=NC(N)=CC(N)=N1.CC(=O)OCC[N+](C)(C)C	J. Am. Chem. Soc. 2013 135 (35) 12940â€“12943"	COMPLEMENTARY	AuSphericalDoubleMonomerPDT/ACh	Gram-SYS
13	1	1	0.619251	1	0.731059	0	0.269988	Au	MBC (uM)	10.154	Escherichia coli	ATCC11775	Spherical	2	PDT/ACh	Double	Monomer	8	EC	Gram-	GIT	1	1	1	1	t	0.447154	-0.004	-0.004	0.100485	0.00996768	0.0108964	-0.142944	-0.119615	-0.149459	-0.109226	-0.000738822	-0.000738822	196.967	10.2	2.54	6.1	2.2	24	SC1=NC(N)=CC(N)=N1.CC(=O)OCC[N+](C)(C)C	J. Am. Chem. Soc. 2013 135 (35) 12940â€“12943"	COMPLEMENTARY	AuSphericalDoubleMonomerPDT/ACh	Gram-GIT
13	0	0	0.2261	0	0.5	0	0.270531	Au	MBC (uM)	10.154	Escherichia coli	ATCC11775	Spherical	2	PDT/ACh	Double	Monomer	25	TY	Gram+	SYS	0	1	1	0	t	0.447154	-0.0005	-0.0005	0.10259	0.0124517	0.0135345	-0.142944	-0.119615	-0.149459	-0.109226	-0.000738822	-0.000738822	196.967	10.2	2.54	6.1	2.2	24	SC1=NC(N)=CC(N)=N1.CC(=O)OCC[N+](C)(C)C	J. Am. Chem. Soc. 2013 135 (35) 12940â€“12943"	COMPLEMENTARY	AuSphericalDoubleMonomerPDT/ACh	Gram+SYS
13	0	0	1.08153e-14	0	0.5	0	0.263982	Au	MBC (uM)	10.154	Escherichia coli	ATCC11775	Spherical	2	PDT/ACh	Double	Monomer	6	CT	Gram-	SYS	0	1	1	0	t	0.447154	0.00457143	0.00557143	0.129748	0.11685	0.11775	-0.142944	-0.119615	-0.149459	-0.109226	-0.000738822	-0.000738822	196.967	10.2	2.54	6.1	2.2	24	SC1=NC(N)=CC(N)=N1.CC(=O)OCC[N+](C)(C)C	J. Am. Chem. Soc. 2013 135 (35) 12940â€“12943"	COMPLEMENTARY	AuSphericalDoubleMonomerPDT/ACh	Gram-SYS
13	0	0	3.09636e-11	0	0.5	0	0.265391	Au	MBC (uM)	10.154	Escherichia coli	ATCC11775	Spherical	2	PDT/ACh	Double	Monomer	4	CJ	Gram-	GIT	0	1	1	0	t	0.447154	-0.002	0	0.122397	0.0791961	0.0807547	-0.142944	-0.119615	-0.149459	-0.109226	-0.000738822	-0.000738822	196.967	10.2	2.54	6.1	2.2	24	SC1=NC(N)=CC(N)=N1.CC(=O)OCC[N+](C)(C)C	J. Am. Chem. Soc. 2013 135 (35) 12940â€“12943"	COMPLEMENTARY	AuSphericalDoubleMonomerPDT/ACh	Gram-GIT
14	1	1	0.619251	1	0.731059	0	0.269988	Au	MBC (uM)	10.154	Escherichia coli	MDR	Spherical	2	PDT/ACh	Double	Monomer	8	EC	Gram-	GIT	1	1	1	1	t	0.447154	-0.004	-0.004	0.100485	0.00996768	0.0108964	-0.142944	-0.119615	-0.149459	-0.109226	-0.000738822	-0.000738822	196.967	10.2	2.54	6.1	2.2	24	SC1=NC(N)=CC(N)=N1.CC(=O)OCC[N+](C)(C)C	J. Am. Chem. Soc. 2013 135 (35) 12940â€“12943"	COMPLEMENTARY	AuSphericalDoubleMonomerPDT/ACh	Gram-GIT
14	1	1	0.619251	1	0.731059	0	0.269988	Au	MBC (uM)	10.154	Escherichia coli	MDR	Spherical	2	PDT/ACh	Double	Monomer	8	EC	Gram-	GIT	1	1	1	1	t	0.447154	-0.004	-0.004	0.100485	0.00996768	0.0108964	-0.142944	-0.119615	-0.149459	-0.109226	-0.000738822	-0.000738822	196.967	10.2	2.54	6.1	2.2	24	SC1=NC(N)=CC(N)=N1.CC(=O)OCC[N+](C)(C)C	J. Am. Chem. Soc. 2013 135 (35) 12940â€“12943"	COMPLEMENTARY	AuSphericalDoubleMonomerPDT/ACh	Gram-GIT
14	0	0	8.97815e-12	0	0.5	0	0.266271	Au	MBC (uM)	10.154	Escherichia coli	MDR	Spherical	2	PDT/ACh	Double	Monomer	21	PN	Gram+	RES	0	1	1	0	t	0.447154	-0.000666667	0.00233333	0.123904	0.0718737	0.0736966	-0.142944	-0.119615	-0.149459	-0.109226	-0.000738822	-0.000738822	196.967	10.2	2.54	6.1	2.2	24	SC1=NC(N)=CC(N)=N1.CC(=O)OCC[N+](C)(C)C	J. Am. Chem. Soc. 2013 135 (35) 12940â€“12943"	COMPLEMENTARY	AuSphericalDoubleMonomerPDT/ACh	Gram+RES
14	0	0	1.14361e-09	0	0.5	0	0.266427	Au	MBC (uM)	10.154	Escherichia coli	MDR	Spherical	2	PDT/ACh	Double	Monomer	24	ST	Gram+	RES	0	1	1	0	t	0.447154	0.00133333	0.00233333	0.124568	0.0735856	0.0748657	-0.142944	-0.119615	-0.149459	-0.109226	-0.000738822	-0.000738822	196.967	10.2	2.54	6.1	2.2	24	SC1=NC(N)=CC(N)=N1.CC(=O)OCC[N+](C)(C)C	J. Am. Chem. Soc. 2013 135 (35) 12940â€“12943"	COMPLEMENTARY	AuSphericalDoubleMonomerPDT/ACh	Gram+RES
14	0	0	1.14361e-09	0	0.5	0	0.266427	Au	MBC (uM)	10.154	Escherichia coli	MDR	Spherical	2	PDT/ACh	Double	Monomer	24	ST	Gram+	RES	0	1	1	0	t	0.447154	0.00133333	0.00233333	0.124568	0.0735856	0.0748657	-0.142944	-0.119615	-0.149459	-0.109226	-0.000738822	-0.000738822	196.967	10.2	2.54	6.1	2.2	24	SC1=NC(N)=CC(N)=N1.CC(=O)OCC[N+](C)(C)C	J. Am. Chem. Soc. 2013 135 (35) 12940â€“12943"	COMPLEMENTARY	AuSphericalDoubleMonomerPDT/ACh	Gram+RES
14	1	1	0.619251	1	0.731059	0	0.269988	Au	MBC (uM)	10.154	Escherichia coli	MDR	Spherical	2	PDT/ACh	Double	Monomer	8	EC	Gram-	GIT	1	1	1	1	t	0.447154	-0.004	-0.004	0.100485	0.00996768	0.0108964	-0.142944	-0.119615	-0.149459	-0.109226	-0.000738822	-0.000738822	196.967	10.2	2.54	6.1	2.2	24	SC1=NC(N)=CC(N)=N1.CC(=O)OCC[N+](C)(C)C	J. Am. Chem. Soc. 2013 135 (35) 12940â€“12943"	COMPLEMENTARY	AuSphericalDoubleMonomerPDT/ACh	Gram-GIT
14	0	0	4.97594e-12	0	0.5	0	0.265186	Au	MBC (uM)	10.154	Escherichia coli	MDR	Spherical	2	PDT/ACh	Double	Monomer	20	PG	Gram-	SYS	0	1	1	0	t	0.447154	-0.00442857	-0.00142857	0.11973	0.0759019	0.0779623	-0.142944	-0.119615	-0.149459	-0.109226	-0.000738822	-0.000738822	196.967	10.2	2.54	6.1	2.2	24	SC1=NC(N)=CC(N)=N1.CC(=O)OCC[N+](C)(C)C	J. Am. Chem. Soc. 2013 135 (35) 12940â€“12943"	COMPLEMENTARY	AuSphericalDoubleMonomerPDT/ACh	Gram-SYS
14	0	0	0.2261	0	0.5	0	0.270531	Au	MBC (uM)	10.154	Escherichia coli	MDR	Spherical	2	PDT/ACh	Double	Monomer	25	TY	Gram+	SYS	0	1	1	0	t	0.447154	-0.0005	-0.0005	0.10259	0.0124517	0.0135345	-0.142944	-0.119615	-0.149459	-0.109226	-0.000738822	-0.000738822	196.967	10.2	2.54	6.1	2.2	24	SC1=NC(N)=CC(N)=N1.CC(=O)OCC[N+](C)(C)C	J. Am. Chem. Soc. 2013 135 (35) 12940â€“12943"	COMPLEMENTARY	AuSphericalDoubleMonomerPDT/ACh	Gram+SYS
14	0	0	3.09636e-11	0	0.5	0	0.265391	Au	MBC (uM)	10.154	Escherichia coli	MDR	Spherical	2	PDT/ACh	Double	Monomer	4	CJ	Gram-	GIT	0	1	1	0	t	0.447154	-0.002	0	0.122397	0.0791961	0.0807547	-0.142944	-0.119615	-0.149459	-0.109226	-0.000738822	-0.000738822	196.967	10.2	2.54	6.1	2.2	24	SC1=NC(N)=CC(N)=N1.CC(=O)OCC[N+](C)(C)C	J. Am. Chem. Soc. 2013 135 (35) 12940â€“12943"	COMPLEMENTARY	AuSphericalDoubleMonomerPDT/ACh	Gram-GIT
14	0	0	8.97815e-12	0	0.5	0	0.266271	Au	MBC (uM)	10.154	Escherichia coli	MDR	Spherical	2	PDT/ACh	Double	Monomer	21	PN	Gram+	RES	0	1	1	0	t	0.447154	-0.000666667	0.00233333	0.123904	0.0718737	0.0736966	-0.142944	-0.119615	-0.149459	-0.109226	-0.000738822	-0.000738822	196.967	10.2	2.54	6.1	2.2	24	SC1=NC(N)=CC(N)=N1.CC(=O)OCC[N+](C)(C)C	J. Am. Chem. Soc. 2013 135 (35) 12940â€“12943"	COMPLEMENTARY	AuSphericalDoubleMonomerPDT/ACh	Gram+RES
14	0	0	0.0703399	0	0.5	0	0.26731	Au	MBC (uM)	10.154	Escherichia coli	MDR	Spherical	2	PDT/ACh	Double	Monomer	16	MT	Gram-	RES	0	1	1	0	t	0.447154	-0.009	-0.01	0.0993988	0.0302842	0.0319897	-0.142944	-0.119615	-0.149459	-0.109226	-0.000738822	-0.000738822	196.967	10.2	2.54	6.1	2.2	24	SC1=NC(N)=CC(N)=N1.CC(=O)OCC[N+](C)(C)C	J. Am. Chem. Soc. 2013 135 (35) 12940â€“12943"	COMPLEMENTARY	AuSphericalDoubleMonomerPDT/ACh	Gram-RES
14	1	1	0.619251	1	0.731059	0	0.269988	Au	MBC (uM)	10.154	Escherichia coli	MDR	Spherical	2	PDT/ACh	Double	Monomer	8	EC	Gram-	GIT	1	1	1	1	t	0.447154	-0.004	-0.004	0.100485	0.00996768	0.0108964	-0.142944	-0.119615	-0.149459	-0.109226	-0.000738822	-0.000738822	196.967	10.2	2.54	6.1	2.2	24	SC1=NC(N)=CC(N)=N1.CC(=O)OCC[N+](C)(C)C	J. Am. Chem. Soc. 2013 135 (35) 12940â€“12943"	COMPLEMENTARY	AuSphericalDoubleMonomerPDT/ACh	Gram-GIT
14	0	0	2.3208e-11	0	0.5	0	0.265479	Au	MBC (uM)	10.154	Escherichia coli	MDR	Spherical	2	PDT/ACh	Double	Monomer	9	EF	Gram+	GIT	0	1	1	0	t	0.447154	-0.004	-0.001	0.122096	0.0733832	0.0748523	-0.142944	-0.119615	-0.149459	-0.109226	-0.000738822	-0.000738822	196.967	10.2	2.54	6.1	2.2	24	SC1=NC(N)=CC(N)=N1.CC(=O)OCC[N+](C)(C)C	J. Am. Chem. Soc. 2013 135 (35) 12940â€“12943"	COMPLEMENTARY	AuSphericalDoubleMonomerPDT/ACh	Gram+GIT
14	0	0	0.0190308	0	0.5	0	0.268645	Au	MBC (uM)	10.154	Escherichia coli	MDR	Spherical	2	PDT/ACh	Double	Monomer	10	HI	Gram-	SYS	0	1	1	0	t	0.447154	0.00357143	0.000571429	0.114325	0.0458025	0.0470383	-0.142944	-0.119615	-0.149459	-0.109226	-0.000738822	-0.000738822	196.967	10.2	2.54	6.1	2.2	24	SC1=NC(N)=CC(N)=N1.CC(=O)OCC[N+](C)(C)C	J. Am. Chem. Soc. 2013 135 (35) 12940â€“12943"	COMPLEMENTARY	AuSphericalDoubleMonomerPDT/ACh	Gram-SYS
14	0	1	0.800748	1	0.731059	0	0.271156	Au	MBC (uM)	10.154	Escherichia coli	MDR	Spherical	2	PDT/ACh	Double	Monomer	19	PA	Gram-	SYS	0	1	1	0	t	0.447154	0.00657143	0.00357143	0.102611	0.0205758	0.0222078	-0.142944	-0.119615	-0.149459	-0.109226	-0.000738822	-0.000738822	196.967	10.2	2.54	6.1	2.2	24	SC1=NC(N)=CC(N)=N1.CC(=O)OCC[N+](C)(C)C	J. Am. Chem. Soc. 2013 135 (35) 12940â€“12943"	COMPLEMENTARY	AuSphericalDoubleMonomerPDT/ACh	Gram-SYS
15	1	1	0.63808	1	0.731059	0	0.270092	Au	MBC (uM)	10.154	Escherichia coli	MDR	Spherical	3	PDT/CQ	Double	Monomer	8	EC	Gram-	GIT	1	1	1	1	t	0.447154	-0.004	-0.004	0.100485	0.00996768	0.0108964	-0.142944	-0.119615	-0.149459	-0.105615	-0.000738822	-0.000738822	196.967	10.2	2.54	6.1	2.1	24	SC1=NC(N)=CC(N)=N1.Clc1cc2nccc(c2cc1)NC(C)CCCN(CC)CC	J. Am. Chem. Soc. 2013 135 (35) 12940â€“12943"	COMPLEMENTARY	AuSphericalDoubleMonomerPDT/CQ	Gram-GIT
15	1	1	0.63808	1	0.731059	0	0.270092	Au	MBC (uM)	10.154	Escherichia coli	MDR	Spherical	3	PDT/CQ	Double	Monomer	8	EC	Gram-	GIT	1	1	1	1	t	0.447154	-0.004	-0.004	0.100485	0.00996768	0.0108964	-0.142944	-0.119615	-0.149459	-0.105615	-0.000738822	-0.000738822	196.967	10.2	2.54	6.1	2.1	24	SC1=NC(N)=CC(N)=N1.Clc1cc2nccc(c2cc1)NC(C)CCCN(CC)CC	J. Am. Chem. Soc. 2013 135 (35) 12940â€“12943"	COMPLEMENTARY	AuSphericalDoubleMonomerPDT/CQ	Gram-GIT
15	0	0	9.73245e-12	0	0.5	0	0.266372	Au	MBC (uM)	10.154	Escherichia coli	MDR	Spherical	3	PDT/CQ	Double	Monomer	21	PN	Gram+	RES	0	1	1	0	t	0.447154	-0.000666667	0.00233333	0.123904	0.0718737	0.0736966	-0.142944	-0.119615	-0.149459	-0.105615	-0.000738822	-0.000738822	196.967	10.2	2.54	6.1	2.1	24	SC1=NC(N)=CC(N)=N1.Clc1cc2nccc(c2cc1)NC(C)CCCN(CC)CC	J. Am. Chem. Soc. 2013 135 (35) 12940â€“12943"	COMPLEMENTARY	AuSphericalDoubleMonomerPDT/CQ	Gram+RES
15	0	0	1.23969e-09	0	0.5	0	0.266528	Au	MBC (uM)	10.154	Escherichia coli	MDR	Spherical	3	PDT/CQ	Double	Monomer	24	ST	Gram+	RES	0	1	1	0	t	0.447154	0.00133333	0.00233333	0.124568	0.0735856	0.0748657	-0.142944	-0.119615	-0.149459	-0.105615	-0.000738822	-0.000738822	196.967	10.2	2.54	6.1	2.1	24	SC1=NC(N)=CC(N)=N1.Clc1cc2nccc(c2cc1)NC(C)CCCN(CC)CC	J. Am. Chem. Soc. 2013 135 (35) 12940â€“12943"	COMPLEMENTARY	AuSphericalDoubleMonomerPDT/CQ	Gram+RES
15	0	0	1.23969e-09	0	0.5	0	0.266528	Au	MBC (uM)	10.154	Escherichia coli	MDR	Spherical	3	PDT/CQ	Double	Monomer	24	ST	Gram+	RES	0	1	1	0	t	0.447154	0.00133333	0.00233333	0.124568	0.0735856	0.0748657	-0.142944	-0.119615	-0.149459	-0.105615	-0.000738822	-0.000738822	196.967	10.2	2.54	6.1	2.1	24	SC1=NC(N)=CC(N)=N1.Clc1cc2nccc(c2cc1)NC(C)CCCN(CC)CC	J. Am. Chem. Soc. 2013 135 (35) 12940â€“12943"	COMPLEMENTARY	AuSphericalDoubleMonomerPDT/CQ	Gram+RES
15	1	1	0.63808	1	0.731059	0	0.270092	Au	MBC (uM)	10.154	Escherichia coli	MDR	Spherical	3	PDT/CQ	Double	Monomer	8	EC	Gram-	GIT	1	1	1	1	t	0.447154	-0.004	-0.004	0.100485	0.00996768	0.0108964	-0.142944	-0.119615	-0.149459	-0.105615	-0.000738822	-0.000738822	196.967	10.2	2.54	6.1	2.1	24	SC1=NC(N)=CC(N)=N1.Clc1cc2nccc(c2cc1)NC(C)CCCN(CC)CC	J. Am. Chem. Soc. 2013 135 (35) 12940â€“12943"	COMPLEMENTARY	AuSphericalDoubleMonomerPDT/CQ	Gram-GIT
15	0	0	9.73245e-12	0	0.5	0	0.266372	Au	MBC (uM)	10.154	Escherichia coli	MDR	Spherical	3	PDT/CQ	Double	Monomer	21	PN	Gram+	RES	0	1	1	0	t	0.447154	-0.000666667	0.00233333	0.123904	0.0718737	0.0736966	-0.142944	-0.119615	-0.149459	-0.105615	-0.000738822	-0.000738822	196.967	10.2	2.54	6.1	2.1	24	SC1=NC(N)=CC(N)=N1.Clc1cc2nccc(c2cc1)NC(C)CCCN(CC)CC	J. Am. Chem. Soc. 2013 135 (35) 12940â€“12943"	COMPLEMENTARY	AuSphericalDoubleMonomerPDT/CQ	Gram+RES
15	0	0	5.39399e-12	0	0.5	0	0.265287	Au	MBC (uM)	10.154	Escherichia coli	MDR	Spherical	3	PDT/CQ	Double	Monomer	20	PG	Gram-	SYS	0	1	1	0	t	0.447154	-0.00442857	-0.00142857	0.11973	0.0759019	0.0779623	-0.142944	-0.119615	-0.149459	-0.105615	-0.000738822	-0.000738822	196.967	10.2	2.54	6.1	2.1	24	SC1=NC(N)=CC(N)=N1.Clc1cc2nccc(c2cc1)NC(C)CCCN(CC)CC	J. Am. Chem. Soc. 2013 135 (35) 12940â€“12943"	COMPLEMENTARY	AuSphericalDoubleMonomerPDT/CQ	Gram-SYS
15	0	0	0.240527	0	0.5	0	0.270636	Au	MBC (uM)	10.154	Escherichia coli	MDR	Spherical	3	PDT/CQ	Double	Monomer	25	TY	Gram+	SYS	0	1	1	0	t	0.447154	-0.0005	-0.0005	0.10259	0.0124517	0.0135345	-0.142944	-0.119615	-0.149459	-0.105615	-0.000738822	-0.000738822	196.967	10.2	2.54	6.1	2.1	24	SC1=NC(N)=CC(N)=N1.Clc1cc2nccc(c2cc1)NC(C)CCCN(CC)CC	J. Am. Chem. Soc. 2013 135 (35) 12940â€“12943"	COMPLEMENTARY	AuSphericalDoubleMonomerPDT/CQ	Gram+SYS
15	0	0	3.3565e-11	0	0.5	0	0.265491	Au	MBC (uM)	10.154	Escherichia coli	MDR	Spherical	3	PDT/CQ	Double	Monomer	4	CJ	Gram-	GIT	0	1	1	0	t	0.447154	-0.002	0	0.122397	0.0791961	0.0807547	-0.142944	-0.119615	-0.149459	-0.105615	-0.000738822	-0.000738822	196.967	10.2	2.54	6.1	2.1	24	SC1=NC(N)=CC(N)=N1.Clc1cc2nccc(c2cc1)NC(C)CCCN(CC)CC	J. Am. Chem. Soc. 2013 135 (35) 12940â€“12943"	COMPLEMENTARY	AuSphericalDoubleMonomerPDT/CQ	Gram-GIT
15	1	1	0.63808	1	0.731059	0	0.270092	Au	MBC (uM)	10.154	Escherichia coli	MDR	Spherical	3	PDT/CQ	Double	Monomer	8	EC	Gram-	GIT	1	1	1	1	t	0.447154	-0.004	-0.004	0.100485	0.00996768	0.0108964	-0.142944	-0.119615	-0.149459	-0.105615	-0.000738822	-0.000738822	196.967	10.2	2.54	6.1	2.1	24	SC1=NC(N)=CC(N)=N1.Clc1cc2nccc(c2cc1)NC(C)CCCN(CC)CC	J. Am. Chem. Soc. 2013 135 (35) 12940â€“12943"	COMPLEMENTARY	AuSphericalDoubleMonomerPDT/CQ	Gram-GIT
15	0	0	0.0758015	0	0.5	0	0.267413	Au	MBC (uM)	10.154	Escherichia coli	MDR	Spherical	3	PDT/CQ	Double	Monomer	16	MT	Gram-	RES	0	1	1	0	t	0.447154	-0.009	-0.01	0.0993988	0.0302842	0.0319897	-0.142944	-0.119615	-0.149459	-0.105615	-0.000738822	-0.000738822	196.967	10.2	2.54	6.1	2.1	24	SC1=NC(N)=CC(N)=N1.Clc1cc2nccc(c2cc1)NC(C)CCCN(CC)CC	J. Am. Chem. Soc. 2013 135 (35) 12940â€“12943"	COMPLEMENTARY	AuSphericalDoubleMonomerPDT/CQ	Gram-RES
15	0	0	2.51578e-11	0	0.5	0	0.26558	Au	MBC (uM)	10.154	Escherichia coli	MDR	Spherical	3	PDT/CQ	Double	Monomer	9	EF	Gram+	GIT	0	1	1	0	t	0.447154	-0.004	-0.001	0.122096	0.0733832	0.0748523	-0.142944	-0.119615	-0.149459	-0.105615	-0.000738822	-0.000738822	196.967	10.2	2.54	6.1	2.1	24	SC1=NC(N)=CC(N)=N1.Clc1cc2nccc(c2cc1)NC(C)CCCN(CC)CC	J. Am. Chem. Soc. 2013 135 (35) 12940â€“12943"	COMPLEMENTARY	AuSphericalDoubleMonomerPDT/CQ	Gram+GIT
15	0	0	0.0205968	0	0.5	0	0.268748	Au	MBC (uM)	10.154	Escherichia coli	MDR	Spherical	3	PDT/CQ	Double	Monomer	10	HI	Gram-	SYS	0	1	1	0	t	0.447154	0.00357143	0.000571429	0.114325	0.0458025	0.0470383	-0.142944	-0.119615	-0.149459	-0.105615	-0.000738822	-0.000738822	196.967	10.2	2.54	6.1	2.1	24	SC1=NC(N)=CC(N)=N1.Clc1cc2nccc(c2cc1)NC(C)CCCN(CC)CC	J. Am. Chem. Soc. 2013 135 (35) 12940â€“12943"	COMPLEMENTARY	AuSphericalDoubleMonomerPDT/CQ	Gram-SYS
15	0	0	1.17239e-14	0	0.5	0	0.26408	Au	MBC (uM)	10.154	Escherichia coli	MDR	Spherical	3	PDT/CQ	Double	Monomer	6	CT	Gram-	SYS	0	1	1	0	t	0.447154	0.00457143	0.00557143	0.129748	0.11685	0.11775	-0.142944	-0.119615	-0.149459	-0.105615	-0.000738822	-0.000738822	196.967	10.2	2.54	6.1	2.1	24	SC1=NC(N)=CC(N)=N1.Clc1cc2nccc(c2cc1)NC(C)CCCN(CC)CC	J. Am. Chem. Soc. 2013 135 (35) 12940â€“12943"	COMPLEMENTARY	AuSphericalDoubleMonomerPDT/CQ	Gram-SYS
16	1	1	0.568539	1	0.731059	0	0.269716	Au	MBC (uM)	10.154	Escherichia coli	ATCC11775	Spherical	4	PDT/DMB	Double	Monomer	8	EC	Gram-	GIT	1	1	1	1	t	0.447154	-0.004	-0.004	0.100485	0.00996768	0.0108964	-0.142944	-0.119615	-0.149459	-0.118648	-0.000738822	-0.000738822	196.967	10.2	2.54	6.1	2.5	24	SC1=NC(N)=CC(N)=N1.CN(C(NC(N)=N)=N)C	J. Am. Chem. Soc. 2013 135 (35) 12940â€“12943"	COMPLEMENTARY	AuSphericalDoubleMonomerPDT/DMB	Gram-GIT
16	1	1	0.568539	1	0.731059	0	0.269716	Au	MBC (uM)	10.154	Escherichia coli	ATCC11775	Spherical	4	PDT/DMB	Double	Monomer	8	EC	Gram-	GIT	1	1	1	1	t	0.447154	-0.004	-0.004	0.100485	0.00996768	0.0108964	-0.142944	-0.119615	-0.149459	-0.118648	-0.000738822	-0.000738822	196.967	10.2	2.54	6.1	2.5	24	SC1=NC(N)=CC(N)=N1.CN(C(NC(N)=N)=N)C	J. Am. Chem. Soc. 2013 135 (35) 12940â€“12943"	COMPLEMENTARY	AuSphericalDoubleMonomerPDT/DMB	Gram-GIT
16	0	0	9.26546e-10	0	0.5	0	0.266164	Au	MBC (uM)	10.154	Escherichia coli	ATCC11775	Spherical	4	PDT/DMB	Double	Monomer	24	ST	Gram+	RES	0	1	1	0	t	0.447154	0.00133333	0.00233333	0.124568	0.0735856	0.0748657	-0.142944	-0.119615	-0.149459	-0.118648	-0.000738822	-0.000738822	196.967	10.2	2.54	6.1	2.5	24	SC1=NC(N)=CC(N)=N1.CN(C(NC(N)=N)=N)C	J. Am. Chem. Soc. 2013 135 (35) 12940â€“12943"	COMPLEMENTARY	AuSphericalDoubleMonomerPDT/DMB	Gram+RES
16	1	1	0.568539	1	0.731059	0	0.269716	Au	MBC (uM)	10.154	Escherichia coli	ATCC11775	Spherical	4	PDT/DMB	Double	Monomer	8	EC	Gram-	GIT	1	1	1	1	t	0.447154	-0.004	-0.004	0.100485	0.00996768	0.0108964	-0.142944	-0.119615	-0.149459	-0.118648	-0.000738822	-0.000738822	196.967	10.2	2.54	6.1	2.5	24	SC1=NC(N)=CC(N)=N1.CN(C(NC(N)=N)=N)C	J. Am. Chem. Soc. 2013 135 (35) 12940â€“12943"	COMPLEMENTARY	AuSphericalDoubleMonomerPDT/DMB	Gram-GIT
16	0	0	7.27407e-12	0	0.5	0	0.266008	Au	MBC (uM)	10.154	Escherichia coli	ATCC11775	Spherical	4	PDT/DMB	Double	Monomer	21	PN	Gram+	RES	0	1	1	0	t	0.447154	-0.000666667	0.00233333	0.123904	0.0718737	0.0736966	-0.142944	-0.119615	-0.149459	-0.118648	-0.000738822	-0.000738822	196.967	10.2	2.54	6.1	2.5	24	SC1=NC(N)=CC(N)=N1.CN(C(NC(N)=N)=N)C	J. Am. Chem. Soc. 2013 135 (35) 12940â€“12943"	COMPLEMENTARY	AuSphericalDoubleMonomerPDT/DMB	Gram+RES
16	0	0	9.26546e-10	0	0.5	0	0.266164	Au	MBC (uM)	10.154	Escherichia coli	ATCC11775	Spherical	4	PDT/DMB	Double	Monomer	24	ST	Gram+	RES	0	1	1	0	t	0.447154	0.00133333	0.00233333	0.124568	0.0735856	0.0748657	-0.142944	-0.119615	-0.149459	-0.118648	-0.000738822	-0.000738822	196.967	10.2	2.54	6.1	2.5	24	SC1=NC(N)=CC(N)=N1.CN(C(NC(N)=N)=N)C	J. Am. Chem. Soc. 2013 135 (35) 12940â€“12943"	COMPLEMENTARY	AuSphericalDoubleMonomerPDT/DMB	Gram+RES
16	0	0	0.0577603	0	0.5	0	0.267042	Au	MBC (uM)	10.154	Escherichia coli	ATCC11775	Spherical	4	PDT/DMB	Double	Monomer	16	MT	Gram-	RES	0	1	1	0	t	0.447154	-0.009	-0.01	0.0993988	0.0302842	0.0319897	-0.142944	-0.119615	-0.149459	-0.118648	-0.000738822	-0.000738822	196.967	10.2	2.54	6.1	2.5	24	SC1=NC(N)=CC(N)=N1.CN(C(NC(N)=N)=N)C	J. Am. Chem. Soc. 2013 135 (35) 12940â€“12943"	COMPLEMENTARY	AuSphericalDoubleMonomerPDT/DMB	Gram-RES
16	1	1	0.568539	1	0.731059	0	0.269716	Au	MBC (uM)	10.154	Escherichia coli	ATCC11775	Spherical	4	PDT/DMB	Double	Monomer	8	EC	Gram-	GIT	1	1	1	1	t	0.447154	-0.004	-0.004	0.100485	0.00996768	0.0108964	-0.142944	-0.119615	-0.149459	-0.118648	-0.000738822	-0.000738822	196.967	10.2	2.54	6.1	2.5	24	SC1=NC(N)=CC(N)=N1.CN(C(NC(N)=N)=N)C	J. Am. Chem. Soc. 2013 135 (35) 12940â€“12943"	COMPLEMENTARY	AuSphericalDoubleMonomerPDT/DMB	Gram-GIT
16	0	0	4.03149e-12	0	0.5	0	0.264924	Au	MBC (uM)	10.154	Escherichia coli	ATCC11775	Spherical	4	PDT/DMB	Double	Monomer	20	PG	Gram-	SYS	0	1	1	0	t	0.447154	-0.00442857	-0.00142857	0.11973	0.0759019	0.0779623	-0.142944	-0.119615	-0.149459	-0.118648	-0.000738822	-0.000738822	196.967	10.2	2.54	6.1	2.5	24	SC1=NC(N)=CC(N)=N1.CN(C(NC(N)=N)=N)C	J. Am. Chem. Soc. 2013 135 (35) 12940â€“12943"	COMPLEMENTARY	AuSphericalDoubleMonomerPDT/DMB	Gram-SYS
16	0	0	1.8803e-11	0	0.5	0	0.265217	Au	MBC (uM)	10.154	Escherichia coli	ATCC11775	Spherical	4	PDT/DMB	Double	Monomer	9	EF	Gram+	GIT	0	1	1	0	t	0.447154	-0.004	-0.001	0.122096	0.0733832	0.0748523	-0.142944	-0.119615	-0.149459	-0.118648	-0.000738822	-0.000738822	196.967	10.2	2.54	6.1	2.5	24	SC1=NC(N)=CC(N)=N1.CN(C(NC(N)=N)=N)C	J. Am. Chem. Soc. 2013 135 (35) 12940â€“12943"	COMPLEMENTARY	AuSphericalDoubleMonomerPDT/DMB	Gram+GIT
16	0	0	0.0154746	0	0.5	0	0.268378	Au	MBC (uM)	10.154	Escherichia coli	ATCC11775	Spherical	4	PDT/DMB	Double	Monomer	10	HI	Gram-	SYS	0	1	1	0	t	0.447154	0.00357143	0.000571429	0.114325	0.0458025	0.0470383	-0.142944	-0.119615	-0.149459	-0.118648	-0.000738822	-0.000738822	196.967	10.2	2.54	6.1	2.5	24	SC1=NC(N)=CC(N)=N1.CN(C(NC(N)=N)=N)C	J. Am. Chem. Soc. 2013 135 (35) 12940â€“12943"	COMPLEMENTARY	AuSphericalDoubleMonomerPDT/DMB	Gram-SYS
16	0	0	0.1914	0	0.5	0	0.27026	Au	MBC (uM)	10.154	Escherichia coli	ATCC11775	Spherical	4	PDT/DMB	Double	Monomer	25	TY	Gram+	SYS	0	1	1	0	t	0.447154	-0.0005	-0.0005	0.10259	0.0124517	0.0135345	-0.142944	-0.119615	-0.149459	-0.118648	-0.000738822	-0.000738822	196.967	10.2	2.54	6.1	2.5	24	SC1=NC(N)=CC(N)=N1.CN(C(NC(N)=N)=N)C	J. Am. Chem. Soc. 2013 135 (35) 12940â€“12943"	COMPLEMENTARY	AuSphericalDoubleMonomerPDT/DMB	Gram+SYS
16	0	0	2.50866e-11	0	0.5	0	0.265129	Au	MBC (uM)	10.154	Escherichia coli	ATCC11775	Spherical	4	PDT/DMB	Double	Monomer	4	CJ	Gram-	GIT	0	1	1	0	t	0.447154	-0.002	0	0.122397	0.0791961	0.0807547	-0.142944	-0.119615	-0.149459	-0.118648	-0.000738822	-0.000738822	196.967	10.2	2.54	6.1	2.5	24	SC1=NC(N)=CC(N)=N1.CN(C(NC(N)=N)=N)C	J. Am. Chem. Soc. 2013 135 (35) 12940â€“12943"	COMPLEMENTARY	AuSphericalDoubleMonomerPDT/DMB	Gram-GIT
17	0	0	0.1914	0	0.5	0	0.27026	Au	MBC (uM)	10.154	Klebsiella pneumoniae	MDR	Spherical	4	PDT/DMB	Double	Monomer	25	TY	Gram+	SYS	0	1	1	0	t	0.447154	-0.0005	-0.0005	0.10259	0.0124517	0.0135345	-0.142944	-0.119615	-0.149459	-0.118648	-0.000738822	-0.000738822	196.967	10.2	2.54	6.1	2.5	24	SC1=NC(N)=CC(N)=N1.CN(C(NC(N)=N)=N)C	J. Am. Chem. Soc. 2013 135 (35) 12940â€“12943"	COMPLEMENTARY	AuSphericalDoubleMonomerPDT/DMB	Gram+SYS
17	0	0	0.0577603	0	0.5	0	0.267042	Au	MBC (uM)	10.154	Klebsiella pneumoniae	MDR	Spherical	4	PDT/DMB	Double	Monomer	16	MT	Gram-	RES	0	1	1	0	t	0.447154	-0.009	-0.01	0.0993988	0.0302842	0.0319897	-0.142944	-0.119615	-0.149459	-0.118648	-0.000738822	-0.000738822	196.967	10.2	2.54	6.1	2.5	24	SC1=NC(N)=CC(N)=N1.CN(C(NC(N)=N)=N)C	J. Am. Chem. Soc. 2013 135 (35) 12940â€“12943"	COMPLEMENTARY	AuSphericalDoubleMonomerPDT/DMB	Gram-RES
17	0	0	2.50866e-11	0	0.5	0	0.265129	Au	MBC (uM)	10.154	Klebsiella pneumoniae	MDR	Spherical	4	PDT/DMB	Double	Monomer	4	CJ	Gram-	GIT	0	1	1	0	t	0.447154	-0.002	0	0.122397	0.0791961	0.0807547	-0.142944	-0.119615	-0.149459	-0.118648	-0.000738822	-0.000738822	196.967	10.2	2.54	6.1	2.5	24	SC1=NC(N)=CC(N)=N1.CN(C(NC(N)=N)=N)C	J. Am. Chem. Soc. 2013 135 (35) 12940â€“12943"	COMPLEMENTARY	AuSphericalDoubleMonomerPDT/DMB	Gram-GIT
17	0	0	0.0154746	0	0.5	0	0.268378	Au	MBC (uM)	10.154	Klebsiella pneumoniae	MDR	Spherical	4	PDT/DMB	Double	Monomer	10	HI	Gram-	SYS	0	1	1	0	t	0.447154	0.00357143	0.000571429	0.114325	0.0458025	0.0470383	-0.142944	-0.119615	-0.149459	-0.118648	-0.000738822	-0.000738822	196.967	10.2	2.54	6.1	2.5	24	SC1=NC(N)=CC(N)=N1.CN(C(NC(N)=N)=N)C	J. Am. Chem. Soc. 2013 135 (35) 12940â€“12943"	COMPLEMENTARY	AuSphericalDoubleMonomerPDT/DMB	Gram-SYS
17	0	0	1.8803e-11	0	0.5	0	0.265217	Au	MBC (uM)	10.154	Klebsiella pneumoniae	MDR	Spherical	4	PDT/DMB	Double	Monomer	9	EF	Gram+	GIT	0	1	1	0	t	0.447154	-0.004	-0.001	0.122096	0.0733832	0.0748523	-0.142944	-0.119615	-0.149459	-0.118648	-0.000738822	-0.000738822	196.967	10.2	2.54	6.1	2.5	24	SC1=NC(N)=CC(N)=N1.CN(C(NC(N)=N)=N)C	J. Am. Chem. Soc. 2013 135 (35) 12940â€“12943"	COMPLEMENTARY	AuSphericalDoubleMonomerPDT/DMB	Gram+GIT
17	0	0	9.26546e-10	0	0.5	0	0.266164	Au	MBC (uM)	10.154	Klebsiella pneumoniae	MDR	Spherical	4	PDT/DMB	Double	Monomer	24	ST	Gram+	RES	0	1	1	0	t	0.447154	0.00133333	0.00233333	0.124568	0.0735856	0.0748657	-0.142944	-0.119615	-0.149459	-0.118648	-0.000738822	-0.000738822	196.967	10.2	2.54	6.1	2.5	24	SC1=NC(N)=CC(N)=N1.CN(C(NC(N)=N)=N)C	J. Am. Chem. Soc. 2013 135 (35) 12940â€“12943"	COMPLEMENTARY	AuSphericalDoubleMonomerPDT/DMB	Gram+RES
17	0	0	8.76249e-15	0	0.5	0	0.263725	Au	MBC (uM)	10.154	Klebsiella pneumoniae	MDR	Spherical	4	PDT/DMB	Double	Monomer	6	CT	Gram-	SYS	0	1	1	0	t	0.447154	0.00457143	0.00557143	0.129748	0.11685	0.11775	-0.142944	-0.119615	-0.149459	-0.118648	-0.000738822	-0.000738822	196.967	10.2	2.54	6.1	2.5	24	SC1=NC(N)=CC(N)=N1.CN(C(NC(N)=N)=N)C	J. Am. Chem. Soc. 2013 135 (35) 12940â€“12943"	COMPLEMENTARY	AuSphericalDoubleMonomerPDT/DMB	Gram-SYS
18	0	0	3.09636e-11	0	0.5	0	0.265391	Au	MBC (uM)	10.154	Escherichia coli	ATCC11775	Spherical	5	PDT/CPB	Double	Monomer	4	CJ	Gram-	GIT	0	1	1	0	t	0.447154	-0.002	0	0.122397	0.0791961	0.0807547	-0.142944	-0.119615	-0.149459	-0.109226	-0.000738822	-0.000738822	196.967	10.2	2.54	6.1	2.2	24	SC1=NC(N)=CC(N)=N1.N=C(NC(N)=N)NC1=CC(Cl)=CC=C1	J. Am. Chem. Soc. 2013 135 (35) 12940â€“12943"	COMPLEMENTARY	AuSphericalDoubleMonomerPDT/CPB	Gram-GIT
18	1	1	0.619251	1	0.731059	0	0.269988	Au	MBC (uM)	10.154	Escherichia coli	ATCC11775	Spherical	5	PDT/CPB	Double	Monomer	8	EC	Gram-	GIT	1	1	1	1	t	0.447154	-0.004	-0.004	0.100485	0.00996768	0.0108964	-0.142944	-0.119615	-0.149459	-0.109226	-0.000738822	-0.000738822	196.967	10.2	2.54	6.1	2.2	24	SC1=NC(N)=CC(N)=N1.N=C(NC(N)=N)NC1=CC(Cl)=CC=C1	J. Am. Chem. Soc. 2013 135 (35) 12940â€“12943"	COMPLEMENTARY	AuSphericalDoubleMonomerPDT/CPB	Gram-GIT
18	1	1	0.619251	1	0.731059	0	0.269988	Au	MBC (uM)	10.154	Escherichia coli	ATCC11775	Spherical	5	PDT/CPB	Double	Monomer	8	EC	Gram-	GIT	1	1	1	1	t	0.447154	-0.004	-0.004	0.100485	0.00996768	0.0108964	-0.142944	-0.119615	-0.149459	-0.109226	-0.000738822	-0.000738822	196.967	10.2	2.54	6.1	2.2	24	SC1=NC(N)=CC(N)=N1.N=C(NC(N)=N)NC1=CC(Cl)=CC=C1	J. Am. Chem. Soc. 2013 135 (35) 12940â€“12943"	COMPLEMENTARY	AuSphericalDoubleMonomerPDT/CPB	Gram-GIT
18	0	0	1.14361e-09	0	0.5	0	0.266427	Au	MBC (uM)	10.154	Escherichia coli	ATCC11775	Spherical	5	PDT/CPB	Double	Monomer	24	ST	Gram+	RES	0	1	1	0	t	0.447154	0.00133333	0.00233333	0.124568	0.0735856	0.0748657	-0.142944	-0.119615	-0.149459	-0.109226	-0.000738822	-0.000738822	196.967	10.2	2.54	6.1	2.2	24	SC1=NC(N)=CC(N)=N1.N=C(NC(N)=N)NC1=CC(Cl)=CC=C1	J. Am. Chem. Soc. 2013 135 (35) 12940â€“12943"	COMPLEMENTARY	AuSphericalDoubleMonomerPDT/CPB	Gram+RES
18	0	0	8.97815e-12	0	0.5	0	0.266271	Au	MBC (uM)	10.154	Escherichia coli	ATCC11775	Spherical	5	PDT/CPB	Double	Monomer	21	PN	Gram+	RES	0	1	1	0	t	0.447154	-0.000666667	0.00233333	0.123904	0.0718737	0.0736966	-0.142944	-0.119615	-0.149459	-0.109226	-0.000738822	-0.000738822	196.967	10.2	2.54	6.1	2.2	24	SC1=NC(N)=CC(N)=N1.N=C(NC(N)=N)NC1=CC(Cl)=CC=C1	J. Am. Chem. Soc. 2013 135 (35) 12940â€“12943"	COMPLEMENTARY	AuSphericalDoubleMonomerPDT/CPB	Gram+RES
18	0	0	1.14361e-09	0	0.5	0	0.266427	Au	MBC (uM)	10.154	Escherichia coli	ATCC11775	Spherical	5	PDT/CPB	Double	Monomer	24	ST	Gram+	RES	0	1	1	0	t	0.447154	0.00133333	0.00233333	0.124568	0.0735856	0.0748657	-0.142944	-0.119615	-0.149459	-0.109226	-0.000738822	-0.000738822	196.967	10.2	2.54	6.1	2.2	24	SC1=NC(N)=CC(N)=N1.N=C(NC(N)=N)NC1=CC(Cl)=CC=C1	J. Am. Chem. Soc. 2013 135 (35) 12940â€“12943"	COMPLEMENTARY	AuSphericalDoubleMonomerPDT/CPB	Gram+RES
18	1	1	0.619251	1	0.731059	0	0.269988	Au	MBC (uM)	10.154	Escherichia coli	ATCC11775	Spherical	5	PDT/CPB	Double	Monomer	8	EC	Gram-	GIT	1	1	1	1	t	0.447154	-0.004	-0.004	0.100485	0.00996768	0.0108964	-0.142944	-0.119615	-0.149459	-0.109226	-0.000738822	-0.000738822	196.967	10.2	2.54	6.1	2.2	24	SC1=NC(N)=CC(N)=N1.N=C(NC(N)=N)NC1=CC(Cl)=CC=C1	J. Am. Chem. Soc. 2013 135 (35) 12940â€“12943"	COMPLEMENTARY	AuSphericalDoubleMonomerPDT/CPB	Gram-GIT
18	0	0	0.0703399	0	0.5	0	0.26731	Au	MBC (uM)	10.154	Escherichia coli	ATCC11775	Spherical	5	PDT/CPB	Double	Monomer	16	MT	Gram-	RES	0	1	1	0	t	0.447154	-0.009	-0.01	0.0993988	0.0302842	0.0319897	-0.142944	-0.119615	-0.149459	-0.109226	-0.000738822	-0.000738822	196.967	10.2	2.54	6.1	2.2	24	SC1=NC(N)=CC(N)=N1.N=C(NC(N)=N)NC1=CC(Cl)=CC=C1	J. Am. Chem. Soc. 2013 135 (35) 12940â€“12943"	COMPLEMENTARY	AuSphericalDoubleMonomerPDT/CPB	Gram-RES
18	0	0	1.08153e-14	0	0.5	0	0.263982	Au	MBC (uM)	10.154	Escherichia coli	ATCC11775	Spherical	5	PDT/CPB	Double	Monomer	6	CT	Gram-	SYS	0	1	1	0	t	0.447154	0.00457143	0.00557143	0.129748	0.11685	0.11775	-0.142944	-0.119615	-0.149459	-0.109226	-0.000738822	-0.000738822	196.967	10.2	2.54	6.1	2.2	24	SC1=NC(N)=CC(N)=N1.N=C(NC(N)=N)NC1=CC(Cl)=CC=C1	J. Am. Chem. Soc. 2013 135 (35) 12940â€“12943"	COMPLEMENTARY	AuSphericalDoubleMonomerPDT/CPB	Gram-SYS
18	0	0	4.97594e-12	0	0.5	0	0.265186	Au	MBC (uM)	10.154	Escherichia coli	ATCC11775	Spherical	5	PDT/CPB	Double	Monomer	20	PG	Gram-	SYS	0	1	1	0	t	0.447154	-0.00442857	-0.00142857	0.11973	0.0759019	0.0779623	-0.142944	-0.119615	-0.149459	-0.109226	-0.000738822	-0.000738822	196.967	10.2	2.54	6.1	2.2	24	SC1=NC(N)=CC(N)=N1.N=C(NC(N)=N)NC1=CC(Cl)=CC=C1	J. Am. Chem. Soc. 2013 135 (35) 12940â€“12943"	COMPLEMENTARY	AuSphericalDoubleMonomerPDT/CPB	Gram-SYS
18	0	0	2.3208e-11	0	0.5	0	0.265479	Au	MBC (uM)	10.154	Escherichia coli	ATCC11775	Spherical	5	PDT/CPB	Double	Monomer	9	EF	Gram+	GIT	0	1	1	0	t	0.447154	-0.004	-0.001	0.122096	0.0733832	0.0748523	-0.142944	-0.119615	-0.149459	-0.109226	-0.000738822	-0.000738822	196.967	10.2	2.54	6.1	2.2	24	SC1=NC(N)=CC(N)=N1.N=C(NC(N)=N)NC1=CC(Cl)=CC=C1	J. Am. Chem. Soc. 2013 135 (35) 12940â€“12943"	COMPLEMENTARY	AuSphericalDoubleMonomerPDT/CPB	Gram+GIT
18	0	0	0.0190308	0	0.5	0	0.268645	Au	MBC (uM)	10.154	Escherichia coli	ATCC11775	Spherical	5	PDT/CPB	Double	Monomer	10	HI	Gram-	SYS	0	1	1	0	t	0.447154	0.00357143	0.000571429	0.114325	0.0458025	0.0470383	-0.142944	-0.119615	-0.149459	-0.109226	-0.000738822	-0.000738822	196.967	10.2	2.54	6.1	2.2	24	SC1=NC(N)=CC(N)=N1.N=C(NC(N)=N)NC1=CC(Cl)=CC=C1	J. Am. Chem. Soc. 2013 135 (35) 12940â€“12943"	COMPLEMENTARY	AuSphericalDoubleMonomerPDT/CPB	Gram-SYS
18	0	0	0.2261	0	0.5	0	0.270531	Au	MBC (uM)	10.154	Escherichia coli	ATCC11775	Spherical	5	PDT/CPB	Double	Monomer	25	TY	Gram+	SYS	0	1	1	0	t	0.447154	-0.0005	-0.0005	0.10259	0.0124517	0.0135345	-0.142944	-0.119615	-0.149459	-0.109226	-0.000738822	-0.000738822	196.967	10.2	2.54	6.1	2.2	24	SC1=NC(N)=CC(N)=N1.N=C(NC(N)=N)NC1=CC(Cl)=CC=C1	J. Am. Chem. Soc. 2013 135 (35) 12940â€“12943"	COMPLEMENTARY	AuSphericalDoubleMonomerPDT/CPB	Gram+SYS
18	1	1	0.619251	1	0.731059	0	0.269988	Au	MBC (uM)	10.154	Escherichia coli	ATCC11775	Spherical	5	PDT/CPB	Double	Monomer	8	EC	Gram-	GIT	1	1	1	1	t	0.447154	-0.004	-0.004	0.100485	0.00996768	0.0108964	-0.142944	-0.119615	-0.149459	-0.109226	-0.000738822	-0.000738822	196.967	10.2	2.54	6.1	2.2	24	SC1=NC(N)=CC(N)=N1.N=C(NC(N)=N)NC1=CC(Cl)=CC=C1	J. Am. Chem. Soc. 2013 135 (35) 12940â€“12943"	COMPLEMENTARY	AuSphericalDoubleMonomerPDT/CPB	Gram-GIT
18	0	0	3.09636e-11	0	0.5	0	0.265391	Au	MBC (uM)	10.154	Escherichia coli	ATCC11775	Spherical	5	PDT/CPB	Double	Monomer	4	CJ	Gram-	GIT	0	1	1	0	t	0.447154	-0.002	0	0.122397	0.0791961	0.0807547	-0.142944	-0.119615	-0.149459	-0.109226	-0.000738822	-0.000738822	196.967	10.2	2.54	6.1	2.2	24	SC1=NC(N)=CC(N)=N1.N=C(NC(N)=N)NC1=CC(Cl)=CC=C1	J. Am. Chem. Soc. 2013 135 (35) 12940â€“12943"	COMPLEMENTARY	AuSphericalDoubleMonomerPDT/CPB	Gram-GIT
19	1	1	0.657731	1	0.731059	0	0.270203	Au	MBC (uM)	10.154	Escherichia coli	ATCC11775	Spherical	6	PDT/G	Double	Monomer	8	EC	Gram-	GIT	1	1	1	1	t	0.447154	-0.004	-0.004	0.100485	0.00996768	0.0108964	-0.142944	-0.119615	-0.149459	-0.101758	-0.000738822	-0.000738822	196.967	10.2	2.54	6.1	2	24	SC1=NC(N)=CC(N)=N1.NC(N)=N	J. Am. Chem. Soc. 2013 135 (35) 12940â€“12943"	COMPLEMENTARY	AuSphericalDoubleMonomerPDT/G	Gram-GIT
19	1	1	0.657731	1	0.731059	0	0.270203	Au	MBC (uM)	10.154	Escherichia coli	ATCC11775	Spherical	6	PDT/G	Double	Monomer	8	EC	Gram-	GIT	1	1	1	1	t	0.447154	-0.004	-0.004	0.100485	0.00996768	0.0108964	-0.142944	-0.119615	-0.149459	-0.101758	-0.000738822	-0.000738822	196.967	10.2	2.54	6.1	2	24	SC1=NC(N)=CC(N)=N1.NC(N)=N	J. Am. Chem. Soc. 2013 135 (35) 12940â€“12943"	COMPLEMENTARY	AuSphericalDoubleMonomerPDT/G	Gram-GIT
19	0	0	1.06082e-11	0	0.5	0	0.266481	Au	MBC (uM)	10.154	Escherichia coli	ATCC11775	Spherical	6	PDT/G	Double	Monomer	21	PN	Gram+	RES	0	1	1	0	t	0.447154	-0.000666667	0.00233333	0.123904	0.0718737	0.0736966	-0.142944	-0.119615	-0.149459	-0.101758	-0.000738822	-0.000738822	196.967	10.2	2.54	6.1	2	24	SC1=NC(N)=CC(N)=N1.NC(N)=N	J. Am. Chem. Soc. 2013 135 (35) 12940â€“12943"	COMPLEMENTARY	AuSphericalDoubleMonomerPDT/G	Gram+RES
19	0	0	1.35123e-09	0	0.5	0	0.266636	Au	MBC (uM)	10.154	Escherichia coli	ATCC11775	Spherical	6	PDT/G	Double	Monomer	24	ST	Gram+	RES	0	1	1	0	t	0.447154	0.00133333	0.00233333	0.124568	0.0735856	0.0748657	-0.142944	-0.119615	-0.149459	-0.101758	-0.000738822	-0.000738822	196.967	10.2	2.54	6.1	2	24	SC1=NC(N)=CC(N)=N1.NC(N)=N	J. Am. Chem. Soc. 2013 135 (35) 12940â€“12943"	COMPLEMENTARY	AuSphericalDoubleMonomerPDT/G	Gram+RES
19	0	0	1.06082e-11	0	0.5	0	0.266481	Au	MBC (uM)	10.154	Escherichia coli	ATCC11775	Spherical	6	PDT/G	Double	Monomer	21	PN	Gram+	RES	0	1	1	0	t	0.447154	-0.000666667	0.00233333	0.123904	0.0718737	0.0736966	-0.142944	-0.119615	-0.149459	-0.101758	-0.000738822	-0.000738822	196.967	10.2	2.54	6.1	2	24	SC1=NC(N)=CC(N)=N1.NC(N)=N	J. Am. Chem. Soc. 2013 135 (35) 12940â€“12943"	COMPLEMENTARY	AuSphericalDoubleMonomerPDT/G	Gram+RES
19	0	0	1.35123e-09	0	0.5	0	0.266636	Au	MBC (uM)	10.154	Escherichia coli	ATCC11775	Spherical	6	PDT/G	Double	Monomer	24	ST	Gram+	RES	0	1	1	0	t	0.447154	0.00133333	0.00233333	0.124568	0.0735856	0.0748657	-0.142944	-0.119615	-0.149459	-0.101758	-0.000738822	-0.000738822	196.967	10.2	2.54	6.1	2	24	SC1=NC(N)=CC(N)=N1.NC(N)=N	J. Am. Chem. Soc. 2013 135 (35) 12940â€“12943"	COMPLEMENTARY	AuSphericalDoubleMonomerPDT/G	Gram+RES
19	1	1	0.657731	1	0.731059	0	0.270203	Au	MBC (uM)	10.154	Escherichia coli	ATCC11775	Spherical	6	PDT/G	Double	Monomer	8	EC	Gram-	GIT	1	1	1	1	t	0.447154	-0.004	-0.004	0.100485	0.00996768	0.0108964	-0.142944	-0.119615	-0.149459	-0.101758	-0.000738822	-0.000738822	196.967	10.2	2.54	6.1	2	24	SC1=NC(N)=CC(N)=N1.NC(N)=N	J. Am. Chem. Soc. 2013 135 (35) 12940â€“12943"	COMPLEMENTARY	AuSphericalDoubleMonomerPDT/G	Gram-GIT
19	0	0	3.65852e-11	0	0.5	0	0.265599	Au	MBC (uM)	10.154	Escherichia coli	ATCC11775	Spherical	6	PDT/G	Double	Monomer	4	CJ	Gram-	GIT	0	1	1	0	t	0.447154	-0.002	0	0.122397	0.0791961	0.0807547	-0.142944	-0.119615	-0.149459	-0.101758	-0.000738822	-0.000738822	196.967	10.2	2.54	6.1	2	24	SC1=NC(N)=CC(N)=N1.NC(N)=N	J. Am. Chem. Soc. 2013 135 (35) 12940â€“12943"	COMPLEMENTARY	AuSphericalDoubleMonomerPDT/G	Gram-GIT
19	0	0	0.0820624	0	0.5	0	0.267523	Au	MBC (uM)	10.154	Escherichia coli	ATCC11775	Spherical	6	PDT/G	Double	Monomer	16	MT	Gram-	RES	0	1	1	0	t	0.447154	-0.009	-0.01	0.0993988	0.0302842	0.0319897	-0.142944	-0.119615	-0.149459	-0.101758	-0.000738822	-0.000738822	196.967	10.2	2.54	6.1	2	24	SC1=NC(N)=CC(N)=N1.NC(N)=N	J. Am. Chem. Soc. 2013 135 (35) 12940â€“12943"	COMPLEMENTARY	AuSphericalDoubleMonomerPDT/G	Gram-RES
19	0	0	0.256616	0	0.5	0	0.270747	Au	MBC (uM)	10.154	Escherichia coli	ATCC11775	Spherical	6	PDT/G	Double	Monomer	25	TY	Gram+	SYS	0	1	1	0	t	0.447154	-0.0005	-0.0005	0.10259	0.0124517	0.0135345	-0.142944	-0.119615	-0.149459	-0.101758	-0.000738822	-0.000738822	196.967	10.2	2.54	6.1	2	24	SC1=NC(N)=CC(N)=N1.NC(N)=N	J. Am. Chem. Soc. 2013 135 (35) 12940â€“12943"	COMPLEMENTARY	AuSphericalDoubleMonomerPDT/G	Gram+SYS
19	1	1	0.657731	1	0.731059	0	0.270203	Au	MBC (uM)	10.154	Escherichia coli	ATCC11775	Spherical	6	PDT/G	Double	Monomer	8	EC	Gram-	GIT	1	1	1	1	t	0.447154	-0.004	-0.004	0.100485	0.00996768	0.0108964	-0.142944	-0.119615	-0.149459	-0.101758	-0.000738822	-0.000738822	196.967	10.2	2.54	6.1	2	24	SC1=NC(N)=CC(N)=N1.NC(N)=N	J. Am. Chem. Soc. 2013 135 (35) 12940â€“12943"	COMPLEMENTARY	AuSphericalDoubleMonomerPDT/G	Gram-GIT
19	0	0	0.0224085	0	0.5	0	0.268858	Au	MBC (uM)	10.154	Escherichia coli	ATCC11775	Spherical	6	PDT/G	Double	Monomer	10	HI	Gram-	SYS	0	1	1	0	t	0.447154	0.00357143	0.000571429	0.114325	0.0458025	0.0470383	-0.142944	-0.119615	-0.149459	-0.101758	-0.000738822	-0.000738822	196.967	10.2	2.54	6.1	2	24	SC1=NC(N)=CC(N)=N1.NC(N)=N	J. Am. Chem. Soc. 2013 135 (35) 12940â€“12943"	COMPLEMENTARY	AuSphericalDoubleMonomerPDT/G	Gram-SYS
19	0	0	5.87934e-12	0	0.5	0	0.265394	Au	MBC (uM)	10.154	Escherichia coli	ATCC11775	Spherical	6	PDT/G	Double	Monomer	20	PG	Gram-	SYS	0	1	1	0	t	0.447154	-0.00442857	-0.00142857	0.11973	0.0759019	0.0779623	-0.142944	-0.119615	-0.149459	-0.101758	-0.000738822	-0.000738822	196.967	10.2	2.54	6.1	2	24	SC1=NC(N)=CC(N)=N1.NC(N)=N	J. Am. Chem. Soc. 2013 135 (35) 12940â€“12943"	COMPLEMENTARY	AuSphericalDoubleMonomerPDT/G	Gram-SYS
19	0	0	2.74214e-11	0	0.5	0	0.265688	Au	MBC (uM)	10.154	Escherichia coli	ATCC11775	Spherical	6	PDT/G	Double	Monomer	9	EF	Gram+	GIT	0	1	1	0	t	0.447154	-0.004	-0.001	0.122096	0.0733832	0.0748523	-0.142944	-0.119615	-0.149459	-0.101758	-0.000738822	-0.000738822	196.967	10.2	2.54	6.1	2	24	SC1=NC(N)=CC(N)=N1.NC(N)=N	J. Am. Chem. Soc. 2013 135 (35) 12940â€“12943"	COMPLEMENTARY	AuSphericalDoubleMonomerPDT/G	Gram+GIT
20	1	1	0.657731	1	0.731059	0	0.270203	Au	MBC (uM)	10.154	Escherichia coli	MDR	Spherical	6	PDT/G	Double	Monomer	8	EC	Gram-	GIT	1	1	1	1	t	0.447154	-0.004	-0.004	0.100485	0.00996768	0.0108964	-0.142944	-0.119615	-0.149459	-0.101758	-0.000738822	-0.000738822	196.967	10.2	2.54	6.1	2	24	SC1=NC(N)=CC(N)=N1.NC(N)=N	J. Am. Chem. Soc. 2013 135 (35) 12940â€“12943"	COMPLEMENTARY	AuSphericalDoubleMonomerPDT/G	Gram-GIT
20	1	1	0.657731	1	0.731059	0	0.270203	Au	MBC (uM)	10.154	Escherichia coli	MDR	Spherical	6	PDT/G	Double	Monomer	8	EC	Gram-	GIT	1	1	1	1	t	0.447154	-0.004	-0.004	0.100485	0.00996768	0.0108964	-0.142944	-0.119615	-0.149459	-0.101758	-0.000738822	-0.000738822	196.967	10.2	2.54	6.1	2	24	SC1=NC(N)=CC(N)=N1.NC(N)=N	J. Am. Chem. Soc. 2013 135 (35) 12940â€“12943"	COMPLEMENTARY	AuSphericalDoubleMonomerPDT/G	Gram-GIT
20	0	0	1.06082e-11	0	0.5	0	0.266481	Au	MBC (uM)	10.154	Escherichia coli	MDR	Spherical	6	PDT/G	Double	Monomer	21	PN	Gram+	RES	0	1	1	0	t	0.447154	-0.000666667	0.00233333	0.123904	0.0718737	0.0736966	-0.142944	-0.119615	-0.149459	-0.101758	-0.000738822	-0.000738822	196.967	10.2	2.54	6.1	2	24	SC1=NC(N)=CC(N)=N1.NC(N)=N	J. Am. Chem. Soc. 2013 135 (35) 12940â€“12943"	COMPLEMENTARY	AuSphericalDoubleMonomerPDT/G	Gram+RES
20	0	0	1.35123e-09	0	0.5	0	0.266636	Au	MBC (uM)	10.154	Escherichia coli	MDR	Spherical	6	PDT/G	Double	Monomer	24	ST	Gram+	RES	0	1	1	0	t	0.447154	0.00133333	0.00233333	0.124568	0.0735856	0.0748657	-0.142944	-0.119615	-0.149459	-0.101758	-0.000738822	-0.000738822	196.967	10.2	2.54	6.1	2	24	SC1=NC(N)=CC(N)=N1.NC(N)=N	J. Am. Chem. Soc. 2013 135 (35) 12940â€“12943"	COMPLEMENTARY	AuSphericalDoubleMonomerPDT/G	Gram+RES
20	1	1	0.657731	1	0.731059	0	0.270203	Au	MBC (uM)	10.154	Escherichia coli	MDR	Spherical	6	PDT/G	Double	Monomer	8	EC	Gram-	GIT	1	1	1	1	t	0.447154	-0.004	-0.004	0.100485	0.00996768	0.0108964	-0.142944	-0.119615	-0.149459	-0.101758	-0.000738822	-0.000738822	196.967	10.2	2.54	6.1	2	24	SC1=NC(N)=CC(N)=N1.NC(N)=N	J. Am. Chem. Soc. 2013 135 (35) 12940â€“12943"	COMPLEMENTARY	AuSphericalDoubleMonomerPDT/G	Gram-GIT
20	0	0	1.06082e-11	0	0.5	0	0.266481	Au	MBC (uM)	10.154	Escherichia coli	MDR	Spherical	6	PDT/G	Double	Monomer	21	PN	Gram+	RES	0	1	1	0	t	0.447154	-0.000666667	0.00233333	0.123904	0.0718737	0.0736966	-0.142944	-0.119615	-0.149459	-0.101758	-0.000738822	-0.000738822	196.967	10.2	2.54	6.1	2	24	SC1=NC(N)=CC(N)=N1.NC(N)=N	J. Am. Chem. Soc. 2013 135 (35) 12940â€“12943"	COMPLEMENTARY	AuSphericalDoubleMonomerPDT/G	Gram+RES
20	0	0	1.35123e-09	0	0.5	0	0.266636	Au	MBC (uM)	10.154	Escherichia coli	MDR	Spherical	6	PDT/G	Double	Monomer	24	ST	Gram+	RES	0	1	1	0	t	0.447154	0.00133333	0.00233333	0.124568	0.0735856	0.0748657	-0.142944	-0.119615	-0.149459	-0.101758	-0.000738822	-0.000738822	196.967	10.2	2.54	6.1	2	24	SC1=NC(N)=CC(N)=N1.NC(N)=N	J. Am. Chem. Soc. 2013 135 (35) 12940â€“12943"	COMPLEMENTARY	AuSphericalDoubleMonomerPDT/G	Gram+RES
20	0	0	0.256616	0	0.5	0	0.270747	Au	MBC (uM)	10.154	Escherichia coli	MDR	Spherical	6	PDT/G	Double	Monomer	25	TY	Gram+	SYS	0	1	1	0	t	0.447154	-0.0005	-0.0005	0.10259	0.0124517	0.0135345	-0.142944	-0.119615	-0.149459	-0.101758	-0.000738822	-0.000738822	196.967	10.2	2.54	6.1	2	24	SC1=NC(N)=CC(N)=N1.NC(N)=N	J. Am. Chem. Soc. 2013 135 (35) 12940â€“12943"	COMPLEMENTARY	AuSphericalDoubleMonomerPDT/G	Gram+SYS
20	0	0	5.87934e-12	0	0.5	0	0.265394	Au	MBC (uM)	10.154	Escherichia coli	MDR	Spherical	6	PDT/G	Double	Monomer	20	PG	Gram-	SYS	0	1	1	0	t	0.447154	-0.00442857	-0.00142857	0.11973	0.0759019	0.0779623	-0.142944	-0.119615	-0.149459	-0.101758	-0.000738822	-0.000738822	196.967	10.2	2.54	6.1	2	24	SC1=NC(N)=CC(N)=N1.NC(N)=N	J. Am. Chem. Soc. 2013 135 (35) 12940â€“12943"	COMPLEMENTARY	AuSphericalDoubleMonomerPDT/G	Gram-SYS
20	1	1	0.657731	1	0.731059	0	0.270203	Au	MBC (uM)	10.154	Escherichia coli	MDR	Spherical	6	PDT/G	Double	Monomer	8	EC	Gram-	GIT	1	1	1	1	t	0.447154	-0.004	-0.004	0.100485	0.00996768	0.0108964	-0.142944	-0.119615	-0.149459	-0.101758	-0.000738822	-0.000738822	196.967	10.2	2.54	6.1	2	24	SC1=NC(N)=CC(N)=N1.NC(N)=N	J. Am. Chem. Soc. 2013 135 (35) 12940â€“12943"	COMPLEMENTARY	AuSphericalDoubleMonomerPDT/G	Gram-GIT
20	0	0	3.65852e-11	0	0.5	0	0.265599	Au	MBC (uM)	10.154	Escherichia coli	MDR	Spherical	6	PDT/G	Double	Monomer	4	CJ	Gram-	GIT	0	1	1	0	t	0.447154	-0.002	0	0.122397	0.0791961	0.0807547	-0.142944	-0.119615	-0.149459	-0.101758	-0.000738822	-0.000738822	196.967	10.2	2.54	6.1	2	24	SC1=NC(N)=CC(N)=N1.NC(N)=N	J. Am. Chem. Soc. 2013 135 (35) 12940â€“12943"	COMPLEMENTARY	AuSphericalDoubleMonomerPDT/G	Gram-GIT
20	0	0	0.0224085	0	0.5	0	0.268858	Au	MBC (uM)	10.154	Escherichia coli	MDR	Spherical	6	PDT/G	Double	Monomer	10	HI	Gram-	SYS	0	1	1	0	t	0.447154	0.00357143	0.000571429	0.114325	0.0458025	0.0470383	-0.142944	-0.119615	-0.149459	-0.101758	-0.000738822	-0.000738822	196.967	10.2	2.54	6.1	2	24	SC1=NC(N)=CC(N)=N1.NC(N)=N	J. Am. Chem. Soc. 2013 135 (35) 12940â€“12943"	COMPLEMENTARY	AuSphericalDoubleMonomerPDT/G	Gram-SYS
20	0	0	0.0820624	0	0.5	0	0.267523	Au	MBC (uM)	10.154	Escherichia coli	MDR	Spherical	6	PDT/G	Double	Monomer	16	MT	Gram-	RES	0	1	1	0	t	0.447154	-0.009	-0.01	0.0993988	0.0302842	0.0319897	-0.142944	-0.119615	-0.149459	-0.101758	-0.000738822	-0.000738822	196.967	10.2	2.54	6.1	2	24	SC1=NC(N)=CC(N)=N1.NC(N)=N	J. Am. Chem. Soc. 2013 135 (35) 12940â€“12943"	COMPLEMENTARY	AuSphericalDoubleMonomerPDT/G	Gram-RES
20	0	0	2.74214e-11	0	0.5	0	0.265688	Au	MBC (uM)	10.154	Escherichia coli	MDR	Spherical	6	PDT/G	Double	Monomer	9	EF	Gram+	GIT	0	1	1	0	t	0.447154	-0.004	-0.001	0.122096	0.0733832	0.0748523	-0.142944	-0.119615	-0.149459	-0.101758	-0.000738822	-0.000738822	196.967	10.2	2.54	6.1	2	24	SC1=NC(N)=CC(N)=N1.NC(N)=N	J. Am. Chem. Soc. 2013 135 (35) 12940â€“12943"	COMPLEMENTARY	AuSphericalDoubleMonomerPDT/G	Gram+GIT
20	0	0	1.27788e-14	0	0.5	0	0.264186	Au	MBC (uM)	10.154	Escherichia coli	MDR	Spherical	6	PDT/G	Double	Monomer	6	CT	Gram-	SYS	0	1	1	0	t	0.447154	0.00457143	0.00557143	0.129748	0.11685	0.11775	-0.142944	-0.119615	-0.149459	-0.101758	-0.000738822	-0.000738822	196.967	10.2	2.54	6.1	2	24	SC1=NC(N)=CC(N)=N1.NC(N)=N	J. Am. Chem. Soc. 2013 135 (35) 12940â€“12943"	COMPLEMENTARY	AuSphericalDoubleMonomerPDT/G	Gram-SYS
21	0	0	2.27178e-08	0	0.5	0	0.266881	Au	MBC (uM)	20.308	Acinetobacter baumannii	MDR	Spherical	1	PDT/Mel	Double	Monomer	1	AB	Gram-	GIT	0	1	1	0	t	0.447154	0.003	0.002	0.121641	0.0757609	0.077817	-0.142944	-0.119615	-0.149459	-0.0932976	-0.000738822	-0.000738822	196.967	10.2	2.54	6.1	1.8	24	SC1=NC(N)=CC(N)=N1.c1(nc(nc(n1)N)N)N	J. Am. Chem. Soc. 2013 135 (35) 12940â€“12943"	COMPLEMENTARY	AuSphericalDoubleMonomerPDT/Mel	Gram-GIT
21	0	0	0.0974688	0	0.5	0	0.267764	Au	MBC (uM)	20.308	Acinetobacter baumannii	MDR	Spherical	1	PDT/Mel	Double	Monomer	16	MT	Gram-	RES	0	1	1	0	t	0.447154	-0.009	-0.01	0.0993988	0.0302842	0.0319897	-0.142944	-0.119615	-0.149459	-0.0932976	-0.000738822	-0.000738822	196.967	10.2	2.54	6.1	1.8	24	SC1=NC(N)=CC(N)=N1.c1(nc(nc(n1)N)N)N	J. Am. Chem. Soc. 2013 135 (35) 12940â€“12943"	COMPLEMENTARY	AuSphericalDoubleMonomerPDT/Mel	Gram-RES
21	0	0	4.41955e-11	0	0.5	0	0.265835	Au	MBC (uM)	20.308	Acinetobacter baumannii	MDR	Spherical	1	PDT/Mel	Double	Monomer	4	CJ	Gram-	GIT	0	1	1	0	t	0.447154	-0.002	0	0.122397	0.0791961	0.0807547	-0.142944	-0.119615	-0.149459	-0.0932976	-0.000738822	-0.000738822	196.967	10.2	2.54	6.1	1.8	24	SC1=NC(N)=CC(N)=N1.c1(nc(nc(n1)N)N)N	J. Am. Chem. Soc. 2013 135 (35) 12940â€“12943"	COMPLEMENTARY	AuSphericalDoubleMonomerPDT/Mel	Gram-GIT
21	0	0	1.63231e-09	0	0.5	0	0.266874	Au	MBC (uM)	20.308	Acinetobacter baumannii	MDR	Spherical	1	PDT/Mel	Double	Monomer	24	ST	Gram+	RES	0	1	1	0	t	0.447154	0.00133333	0.00233333	0.124568	0.0735856	0.0748657	-0.142944	-0.119615	-0.149459	-0.0932976	-0.000738822	-0.000738822	196.967	10.2	2.54	6.1	1.8	24	SC1=NC(N)=CC(N)=N1.c1(nc(nc(n1)N)N)N	J. Am. Chem. Soc. 2013 135 (35) 12940â€“12943"	COMPLEMENTARY	AuSphericalDoubleMonomerPDT/Mel	Gram+RES
21	0	0	1.5437e-14	0	0.5	0	0.264417	Au	MBC (uM)	20.308	Acinetobacter baumannii	MDR	Spherical	1	PDT/Mel	Double	Monomer	6	CT	Gram-	SYS	0	1	1	0	t	0.447154	0.00457143	0.00557143	0.129748	0.11685	0.11775	-0.142944	-0.119615	-0.149459	-0.0932976	-0.000738822	-0.000738822	196.967	10.2	2.54	6.1	1.8	24	SC1=NC(N)=CC(N)=N1.c1(nc(nc(n1)N)N)N	J. Am. Chem. Soc. 2013 135 (35) 12940â€“12943"	COMPLEMENTARY	AuSphericalDoubleMonomerPDT/Mel	Gram-SYS
21	0	0	0.294287	0	0.5	0	0.270991	Au	MBC (uM)	20.308	Acinetobacter baumannii	MDR	Spherical	1	PDT/Mel	Double	Monomer	25	TY	Gram+	SYS	0	1	1	0	t	0.447154	-0.0005	-0.0005	0.10259	0.0124517	0.0135345	-0.142944	-0.119615	-0.149459	-0.0932976	-0.000738822	-0.000738822	196.967	10.2	2.54	6.1	1.8	24	SC1=NC(N)=CC(N)=N1.c1(nc(nc(n1)N)N)N	J. Am. Chem. Soc. 2013 135 (35) 12940â€“12943"	COMPLEMENTARY	AuSphericalDoubleMonomerPDT/Mel	Gram+SYS
21	0	0	0.0269442	0	0.5	0	0.269099	Au	MBC (uM)	20.308	Acinetobacter baumannii	MDR	Spherical	1	PDT/Mel	Double	Monomer	10	HI	Gram-	SYS	0	1	1	0	t	0.447154	0.00357143	0.000571429	0.114325	0.0458025	0.0470383	-0.142944	-0.119615	-0.149459	-0.0932976	-0.000738822	-0.000738822	196.967	10.2	2.54	6.1	1.8	24	SC1=NC(N)=CC(N)=N1.c1(nc(nc(n1)N)N)N	J. Am. Chem. Soc. 2013 135 (35) 12940â€“12943"	COMPLEMENTARY	AuSphericalDoubleMonomerPDT/Mel	Gram-SYS
21	0	0	3.31255e-11	0	0.5	0	0.265925	Au	MBC (uM)	20.308	Acinetobacter baumannii	MDR	Spherical	1	PDT/Mel	Double	Monomer	9	EF	Gram+	GIT	0	1	1	0	t	0.447154	-0.004	-0.001	0.122096	0.0733832	0.0748523	-0.142944	-0.119615	-0.149459	-0.0932976	-0.000738822	-0.000738822	196.967	10.2	2.54	6.1	1.8	24	SC1=NC(N)=CC(N)=N1.c1(nc(nc(n1)N)N)N	J. Am. Chem. Soc. 2013 135 (35) 12940â€“12943"	COMPLEMENTARY	AuSphericalDoubleMonomerPDT/Mel	Gram+GIT
22	0	0	0.2261	0	0.5	0	0.270531	Au	MBC (uM)	20.308	Klebsiella pneumoniae	MDR	Spherical	2	PDT/ACh	Double	Monomer	25	TY	Gram+	SYS	0	1	1	0	t	0.447154	-0.0005	-0.0005	0.10259	0.0124517	0.0135345	-0.142944	-0.119615	-0.149459	-0.109226	-0.000738822	-0.000738822	196.967	10.2	2.54	6.1	2.2	24	SC1=NC(N)=CC(N)=N1.CC(=O)OCC[N+](C)(C)C	J. Am. Chem. Soc. 2013 135 (35) 12940â€“12943"	COMPLEMENTARY	AuSphericalDoubleMonomerPDT/ACh	Gram+SYS
22	0	0	3.09636e-11	0	0.5	0	0.265391	Au	MBC (uM)	20.308	Klebsiella pneumoniae	MDR	Spherical	2	PDT/ACh	Double	Monomer	4	CJ	Gram-	GIT	0	1	1	0	t	0.447154	-0.002	0	0.122397	0.0791961	0.0807547	-0.142944	-0.119615	-0.149459	-0.109226	-0.000738822	-0.000738822	196.967	10.2	2.54	6.1	2.2	24	SC1=NC(N)=CC(N)=N1.CC(=O)OCC[N+](C)(C)C	J. Am. Chem. Soc. 2013 135 (35) 12940â€“12943"	COMPLEMENTARY	AuSphericalDoubleMonomerPDT/ACh	Gram-GIT
22	0	0	0.0190308	0	0.5	0	0.268645	Au	MBC (uM)	20.308	Klebsiella pneumoniae	MDR	Spherical	2	PDT/ACh	Double	Monomer	10	HI	Gram-	SYS	0	1	1	0	t	0.447154	0.00357143	0.000571429	0.114325	0.0458025	0.0470383	-0.142944	-0.119615	-0.149459	-0.109226	-0.000738822	-0.000738822	196.967	10.2	2.54	6.1	2.2	24	SC1=NC(N)=CC(N)=N1.CC(=O)OCC[N+](C)(C)C	J. Am. Chem. Soc. 2013 135 (35) 12940â€“12943"	COMPLEMENTARY	AuSphericalDoubleMonomerPDT/ACh	Gram-SYS
22	0	0	0.0703399	0	0.5	0	0.26731	Au	MBC (uM)	20.308	Klebsiella pneumoniae	MDR	Spherical	2	PDT/ACh	Double	Monomer	16	MT	Gram-	RES	0	1	1	0	t	0.447154	-0.009	-0.01	0.0993988	0.0302842	0.0319897	-0.142944	-0.119615	-0.149459	-0.109226	-0.000738822	-0.000738822	196.967	10.2	2.54	6.1	2.2	24	SC1=NC(N)=CC(N)=N1.CC(=O)OCC[N+](C)(C)C	J. Am. Chem. Soc. 2013 135 (35) 12940â€“12943"	COMPLEMENTARY	AuSphericalDoubleMonomerPDT/ACh	Gram-RES
22	0	0	2.3208e-11	0	0.5	0	0.265479	Au	MBC (uM)	20.308	Klebsiella pneumoniae	MDR	Spherical	2	PDT/ACh	Double	Monomer	9	EF	Gram+	GIT	0	1	1	0	t	0.447154	-0.004	-0.001	0.122096	0.0733832	0.0748523	-0.142944	-0.119615	-0.149459	-0.109226	-0.000738822	-0.000738822	196.967	10.2	2.54	6.1	2.2	24	SC1=NC(N)=CC(N)=N1.CC(=O)OCC[N+](C)(C)C	J. Am. Chem. Soc. 2013 135 (35) 12940â€“12943"	COMPLEMENTARY	AuSphericalDoubleMonomerPDT/ACh	Gram+GIT
22	0	0	1.14361e-09	0	0.5	0	0.266427	Au	MBC (uM)	20.308	Klebsiella pneumoniae	MDR	Spherical	2	PDT/ACh	Double	Monomer	24	ST	Gram+	RES	0	1	1	0	t	0.447154	0.00133333	0.00233333	0.124568	0.0735856	0.0748657	-0.142944	-0.119615	-0.149459	-0.109226	-0.000738822	-0.000738822	196.967	10.2	2.54	6.1	2.2	24	SC1=NC(N)=CC(N)=N1.CC(=O)OCC[N+](C)(C)C	J. Am. Chem. Soc. 2013 135 (35) 12940â€“12943"	COMPLEMENTARY	AuSphericalDoubleMonomerPDT/ACh	Gram+RES
22	0	0	1.08153e-14	0	0.5	0	0.263982	Au	MBC (uM)	20.308	Klebsiella pneumoniae	MDR	Spherical	2	PDT/ACh	Double	Monomer	6	CT	Gram-	SYS	0	1	1	0	t	0.447154	0.00457143	0.00557143	0.129748	0.11685	0.11775	-0.142944	-0.119615	-0.149459	-0.109226	-0.000738822	-0.000738822	196.967	10.2	2.54	6.1	2.2	24	SC1=NC(N)=CC(N)=N1.CC(=O)OCC[N+](C)(C)C	J. Am. Chem. Soc. 2013 135 (35) 12940â€“12943"	COMPLEMENTARY	AuSphericalDoubleMonomerPDT/ACh	Gram-SYS
23	0	0	3.09636e-11	0	0.5	0	0.265391	Au	MBC (uM)	20.308	Acinetobacter baumannii	MDR	Spherical	2	PDT/ACh	Double	Monomer	4	CJ	Gram-	GIT	0	1	1	0	t	0.447154	-0.002	0	0.122397	0.0791961	0.0807547	-0.142944	-0.119615	-0.149459	-0.109226	-0.000738822	-0.000738822	196.967	10.2	2.54	6.1	2.2	24	SC1=NC(N)=CC(N)=N1.CC(=O)OCC[N+](C)(C)C	J. Am. Chem. Soc. 2013 135 (35) 12940â€“12943"	COMPLEMENTARY	AuSphericalDoubleMonomerPDT/ACh	Gram-GIT
23	0	0	0.0703399	0	0.5	0	0.26731	Au	MBC (uM)	20.308	Acinetobacter baumannii	MDR	Spherical	2	PDT/ACh	Double	Monomer	16	MT	Gram-	RES	0	1	1	0	t	0.447154	-0.009	-0.01	0.0993988	0.0302842	0.0319897	-0.142944	-0.119615	-0.149459	-0.109226	-0.000738822	-0.000738822	196.967	10.2	2.54	6.1	2.2	24	SC1=NC(N)=CC(N)=N1.CC(=O)OCC[N+](C)(C)C	J. Am. Chem. Soc. 2013 135 (35) 12940â€“12943"	COMPLEMENTARY	AuSphericalDoubleMonomerPDT/ACh	Gram-RES
23	0	0	0.2261	0	0.5	0	0.270531	Au	MBC (uM)	20.308	Acinetobacter baumannii	MDR	Spherical	2	PDT/ACh	Double	Monomer	25	TY	Gram+	SYS	0	1	1	0	t	0.447154	-0.0005	-0.0005	0.10259	0.0124517	0.0135345	-0.142944	-0.119615	-0.149459	-0.109226	-0.000738822	-0.000738822	196.967	10.2	2.54	6.1	2.2	24	SC1=NC(N)=CC(N)=N1.CC(=O)OCC[N+](C)(C)C	J. Am. Chem. Soc. 2013 135 (35) 12940â€“12943"	COMPLEMENTARY	AuSphericalDoubleMonomerPDT/ACh	Gram+SYS
23	0	0	1.14361e-09	0	0.5	0	0.266427	Au	MBC (uM)	20.308	Acinetobacter baumannii	MDR	Spherical	2	PDT/ACh	Double	Monomer	24	ST	Gram+	RES	0	1	1	0	t	0.447154	0.00133333	0.00233333	0.124568	0.0735856	0.0748657	-0.142944	-0.119615	-0.149459	-0.109226	-0.000738822	-0.000738822	196.967	10.2	2.54	6.1	2.2	24	SC1=NC(N)=CC(N)=N1.CC(=O)OCC[N+](C)(C)C	J. Am. Chem. Soc. 2013 135 (35) 12940â€“12943"	COMPLEMENTARY	AuSphericalDoubleMonomerPDT/ACh	Gram+RES
23	0	0	4.97594e-12	0	0.5	0	0.265186	Au	MBC (uM)	20.308	Acinetobacter baumannii	MDR	Spherical	2	PDT/ACh	Double	Monomer	20	PG	Gram-	SYS	0	1	1	0	t	0.447154	-0.00442857	-0.00142857	0.11973	0.0759019	0.0779623	-0.142944	-0.119615	-0.149459	-0.109226	-0.000738822	-0.000738822	196.967	10.2	2.54	6.1	2.2	24	SC1=NC(N)=CC(N)=N1.CC(=O)OCC[N+](C)(C)C	J. Am. Chem. Soc. 2013 135 (35) 12940â€“12943"	COMPLEMENTARY	AuSphericalDoubleMonomerPDT/ACh	Gram-SYS
23	0	0	1.08153e-14	0	0.5	0	0.263982	Au	MBC (uM)	20.308	Acinetobacter baumannii	MDR	Spherical	2	PDT/ACh	Double	Monomer	6	CT	Gram-	SYS	0	1	1	0	t	0.447154	0.00457143	0.00557143	0.129748	0.11685	0.11775	-0.142944	-0.119615	-0.149459	-0.109226	-0.000738822	-0.000738822	196.967	10.2	2.54	6.1	2.2	24	SC1=NC(N)=CC(N)=N1.CC(=O)OCC[N+](C)(C)C	J. Am. Chem. Soc. 2013 135 (35) 12940â€“12943"	COMPLEMENTARY	AuSphericalDoubleMonomerPDT/ACh	Gram-SYS
23	0	0	2.3208e-11	0	0.5	0	0.265479	Au	MBC (uM)	20.308	Acinetobacter baumannii	MDR	Spherical	2	PDT/ACh	Double	Monomer	9	EF	Gram+	GIT	0	1	1	0	t	0.447154	-0.004	-0.001	0.122096	0.0733832	0.0748523	-0.142944	-0.119615	-0.149459	-0.109226	-0.000738822	-0.000738822	196.967	10.2	2.54	6.1	2.2	24	SC1=NC(N)=CC(N)=N1.CC(=O)OCC[N+](C)(C)C	J. Am. Chem. Soc. 2013 135 (35) 12940â€“12943"	COMPLEMENTARY	AuSphericalDoubleMonomerPDT/ACh	Gram+GIT
23	0	0	0.0190308	0	0.5	0	0.268645	Au	MBC (uM)	20.308	Acinetobacter baumannii	MDR	Spherical	2	PDT/ACh	Double	Monomer	10	HI	Gram-	SYS	0	1	1	0	t	0.447154	0.00357143	0.000571429	0.114325	0.0458025	0.0470383	-0.142944	-0.119615	-0.149459	-0.109226	-0.000738822	-0.000738822	196.967	10.2	2.54	6.1	2.2	24	SC1=NC(N)=CC(N)=N1.CC(=O)OCC[N+](C)(C)C	J. Am. Chem. Soc. 2013 135 (35) 12940â€“12943"	COMPLEMENTARY	AuSphericalDoubleMonomerPDT/ACh	Gram-SYS
24	1	1	0.63808	1	0.731059	0	0.270092	Au	MBC (uM)	20.308	Escherichia coli	ATCC11775	Spherical	3	PDT/CQ	Double	Monomer	8	EC	Gram-	GIT	1	1	1	1	t	0.447154	-0.004	-0.004	0.100485	0.00996768	0.0108964	-0.142944	-0.119615	-0.149459	-0.105615	-0.000738822	-0.000738822	196.967	10.2	2.54	6.1	2.1	24	SC1=NC(N)=CC(N)=N1.Clc1cc2nccc(c2cc1)NC(C)CCCN(CC)CC	J. Am. Chem. Soc. 2013 135 (35) 12940â€“12943"	COMPLEMENTARY	AuSphericalDoubleMonomerPDT/CQ	Gram-GIT
24	1	1	0.63808	1	0.731059	0	0.270092	Au	MBC (uM)	20.308	Escherichia coli	ATCC11775	Spherical	3	PDT/CQ	Double	Monomer	8	EC	Gram-	GIT	1	1	1	1	t	0.447154	-0.004	-0.004	0.100485	0.00996768	0.0108964	-0.142944	-0.119615	-0.149459	-0.105615	-0.000738822	-0.000738822	196.967	10.2	2.54	6.1	2.1	24	SC1=NC(N)=CC(N)=N1.Clc1cc2nccc(c2cc1)NC(C)CCCN(CC)CC	J. Am. Chem. Soc. 2013 135 (35) 12940â€“12943"	COMPLEMENTARY	AuSphericalDoubleMonomerPDT/CQ	Gram-GIT
24	0	0	1.23969e-09	0	0.5	0	0.266528	Au	MBC (uM)	20.308	Escherichia coli	ATCC11775	Spherical	3	PDT/CQ	Double	Monomer	24	ST	Gram+	RES	0	1	1	0	t	0.447154	0.00133333	0.00233333	0.124568	0.0735856	0.0748657	-0.142944	-0.119615	-0.149459	-0.105615	-0.000738822	-0.000738822	196.967	10.2	2.54	6.1	2.1	24	SC1=NC(N)=CC(N)=N1.Clc1cc2nccc(c2cc1)NC(C)CCCN(CC)CC	J. Am. Chem. Soc. 2013 135 (35) 12940â€“12943"	COMPLEMENTARY	AuSphericalDoubleMonomerPDT/CQ	Gram+RES
24	0	0	9.73245e-12	0	0.5	0	0.266372	Au	MBC (uM)	20.308	Escherichia coli	ATCC11775	Spherical	3	PDT/CQ	Double	Monomer	21	PN	Gram+	RES	0	1	1	0	t	0.447154	-0.000666667	0.00233333	0.123904	0.0718737	0.0736966	-0.142944	-0.119615	-0.149459	-0.105615	-0.000738822	-0.000738822	196.967	10.2	2.54	6.1	2.1	24	SC1=NC(N)=CC(N)=N1.Clc1cc2nccc(c2cc1)NC(C)CCCN(CC)CC	J. Am. Chem. Soc. 2013 135 (35) 12940â€“12943"	COMPLEMENTARY	AuSphericalDoubleMonomerPDT/CQ	Gram+RES
24	0	0	1.23969e-09	0	0.5	0	0.266528	Au	MBC (uM)	20.308	Escherichia coli	ATCC11775	Spherical	3	PDT/CQ	Double	Monomer	24	ST	Gram+	RES	0	1	1	0	t	0.447154	0.00133333	0.00233333	0.124568	0.0735856	0.0748657	-0.142944	-0.119615	-0.149459	-0.105615	-0.000738822	-0.000738822	196.967	10.2	2.54	6.1	2.1	24	SC1=NC(N)=CC(N)=N1.Clc1cc2nccc(c2cc1)NC(C)CCCN(CC)CC	J. Am. Chem. Soc. 2013 135 (35) 12940â€“12943"	COMPLEMENTARY	AuSphericalDoubleMonomerPDT/CQ	Gram+RES
24	1	1	0.63808	1	0.731059	0	0.270092	Au	MBC (uM)	20.308	Escherichia coli	ATCC11775	Spherical	3	PDT/CQ	Double	Monomer	8	EC	Gram-	GIT	1	1	1	1	t	0.447154	-0.004	-0.004	0.100485	0.00996768	0.0108964	-0.142944	-0.119615	-0.149459	-0.105615	-0.000738822	-0.000738822	196.967	10.2	2.54	6.1	2.1	24	SC1=NC(N)=CC(N)=N1.Clc1cc2nccc(c2cc1)NC(C)CCCN(CC)CC	J. Am. Chem. Soc. 2013 135 (35) 12940â€“12943"	COMPLEMENTARY	AuSphericalDoubleMonomerPDT/CQ	Gram-GIT
24	1	1	0.63808	1	0.731059	0	0.270092	Au	MBC (uM)	20.308	Escherichia coli	ATCC11775	Spherical	3	PDT/CQ	Double	Monomer	8	EC	Gram-	GIT	1	1	1	1	t	0.447154	-0.004	-0.004	0.100485	0.00996768	0.0108964	-0.142944	-0.119615	-0.149459	-0.105615	-0.000738822	-0.000738822	196.967	10.2	2.54	6.1	2.1	24	SC1=NC(N)=CC(N)=N1.Clc1cc2nccc(c2cc1)NC(C)CCCN(CC)CC	J. Am. Chem. Soc. 2013 135 (35) 12940â€“12943"	COMPLEMENTARY	AuSphericalDoubleMonomerPDT/CQ	Gram-GIT
24	0	0	3.3565e-11	0	0.5	0	0.265491	Au	MBC (uM)	20.308	Escherichia coli	ATCC11775	Spherical	3	PDT/CQ	Double	Monomer	4	CJ	Gram-	GIT	0	1	1	0	t	0.447154	-0.002	0	0.122397	0.0791961	0.0807547	-0.142944	-0.119615	-0.149459	-0.105615	-0.000738822	-0.000738822	196.967	10.2	2.54	6.1	2.1	24	SC1=NC(N)=CC(N)=N1.Clc1cc2nccc(c2cc1)NC(C)CCCN(CC)CC	J. Am. Chem. Soc. 2013 135 (35) 12940â€“12943"	COMPLEMENTARY	AuSphericalDoubleMonomerPDT/CQ	Gram-GIT
24	0	0	0.0758015	0	0.5	0	0.267413	Au	MBC (uM)	20.308	Escherichia coli	ATCC11775	Spherical	3	PDT/CQ	Double	Monomer	16	MT	Gram-	RES	0	1	1	0	t	0.447154	-0.009	-0.01	0.0993988	0.0302842	0.0319897	-0.142944	-0.119615	-0.149459	-0.105615	-0.000738822	-0.000738822	196.967	10.2	2.54	6.1	2.1	24	SC1=NC(N)=CC(N)=N1.Clc1cc2nccc(c2cc1)NC(C)CCCN(CC)CC	J. Am. Chem. Soc. 2013 135 (35) 12940â€“12943"	COMPLEMENTARY	AuSphericalDoubleMonomerPDT/CQ	Gram-RES
24	0	0	0.240527	0	0.5	0	0.270636	Au	MBC (uM)	20.308	Escherichia coli	ATCC11775	Spherical	3	PDT/CQ	Double	Monomer	25	TY	Gram+	SYS	0	1	1	0	t	0.447154	-0.0005	-0.0005	0.10259	0.0124517	0.0135345	-0.142944	-0.119615	-0.149459	-0.105615	-0.000738822	-0.000738822	196.967	10.2	2.54	6.1	2.1	24	SC1=NC(N)=CC(N)=N1.Clc1cc2nccc(c2cc1)NC(C)CCCN(CC)CC	J. Am. Chem. Soc. 2013 135 (35) 12940â€“12943"	COMPLEMENTARY	AuSphericalDoubleMonomerPDT/CQ	Gram+SYS
24	0	0	0.0205968	0	0.5	0	0.268748	Au	MBC (uM)	20.308	Escherichia coli	ATCC11775	Spherical	3	PDT/CQ	Double	Monomer	10	HI	Gram-	SYS	0	1	1	0	t	0.447154	0.00357143	0.000571429	0.114325	0.0458025	0.0470383	-0.142944	-0.119615	-0.149459	-0.105615	-0.000738822	-0.000738822	196.967	10.2	2.54	6.1	2.1	24	SC1=NC(N)=CC(N)=N1.Clc1cc2nccc(c2cc1)NC(C)CCCN(CC)CC	J. Am. Chem. Soc. 2013 135 (35) 12940â€“12943"	COMPLEMENTARY	AuSphericalDoubleMonomerPDT/CQ	Gram-SYS
24	0	0	2.51578e-11	0	0.5	0	0.26558	Au	MBC (uM)	20.308	Escherichia coli	ATCC11775	Spherical	3	PDT/CQ	Double	Monomer	9	EF	Gram+	GIT	0	1	1	0	t	0.447154	-0.004	-0.001	0.122096	0.0733832	0.0748523	-0.142944	-0.119615	-0.149459	-0.105615	-0.000738822	-0.000738822	196.967	10.2	2.54	6.1	2.1	24	SC1=NC(N)=CC(N)=N1.Clc1cc2nccc(c2cc1)NC(C)CCCN(CC)CC	J. Am. Chem. Soc. 2013 135 (35) 12940â€“12943"	COMPLEMENTARY	AuSphericalDoubleMonomerPDT/CQ	Gram+GIT
24	0	0	5.39399e-12	0	0.5	0	0.265287	Au	MBC (uM)	20.308	Escherichia coli	ATCC11775	Spherical	3	PDT/CQ	Double	Monomer	20	PG	Gram-	SYS	0	1	1	0	t	0.447154	-0.00442857	-0.00142857	0.11973	0.0759019	0.0779623	-0.142944	-0.119615	-0.149459	-0.105615	-0.000738822	-0.000738822	196.967	10.2	2.54	6.1	2.1	24	SC1=NC(N)=CC(N)=N1.Clc1cc2nccc(c2cc1)NC(C)CCCN(CC)CC	J. Am. Chem. Soc. 2013 135 (35) 12940â€“12943"	COMPLEMENTARY	AuSphericalDoubleMonomerPDT/CQ	Gram-SYS
25	0	0	0.0758015	0	0.5	0	0.267413	Au	MBC (uM)	20.308	Klebsiella pneumoniae	MDR	Spherical	3	PDT/CQ	Double	Monomer	16	MT	Gram-	RES	0	1	1	0	t	0.447154	-0.009	-0.01	0.0993988	0.0302842	0.0319897	-0.142944	-0.119615	-0.149459	-0.105615	-0.000738822	-0.000738822	196.967	10.2	2.54	6.1	2.1	24	SC1=NC(N)=CC(N)=N1.Clc1cc2nccc(c2cc1)NC(C)CCCN(CC)CC	J. Am. Chem. Soc. 2013 135 (35) 12940â€“12943"	COMPLEMENTARY	AuSphericalDoubleMonomerPDT/CQ	Gram-RES
25	0	0	0.240527	0	0.5	0	0.270636	Au	MBC (uM)	20.308	Klebsiella pneumoniae	MDR	Spherical	3	PDT/CQ	Double	Monomer	25	TY	Gram+	SYS	0	1	1	0	t	0.447154	-0.0005	-0.0005	0.10259	0.0124517	0.0135345	-0.142944	-0.119615	-0.149459	-0.105615	-0.000738822	-0.000738822	196.967	10.2	2.54	6.1	2.1	24	SC1=NC(N)=CC(N)=N1.Clc1cc2nccc(c2cc1)NC(C)CCCN(CC)CC	J. Am. Chem. Soc. 2013 135 (35) 12940â€“12943"	COMPLEMENTARY	AuSphericalDoubleMonomerPDT/CQ	Gram+SYS
25	0	0	1.17239e-14	0	0.5	0	0.26408	Au	MBC (uM)	20.308	Klebsiella pneumoniae	MDR	Spherical	3	PDT/CQ	Double	Monomer	6	CT	Gram-	SYS	0	1	1	0	t	0.447154	0.00457143	0.00557143	0.129748	0.11685	0.11775	-0.142944	-0.119615	-0.149459	-0.105615	-0.000738822	-0.000738822	196.967	10.2	2.54	6.1	2.1	24	SC1=NC(N)=CC(N)=N1.Clc1cc2nccc(c2cc1)NC(C)CCCN(CC)CC	J. Am. Chem. Soc. 2013 135 (35) 12940â€“12943"	COMPLEMENTARY	AuSphericalDoubleMonomerPDT/CQ	Gram-SYS
25	0	0	3.3565e-11	0	0.5	0	0.265491	Au	MBC (uM)	20.308	Klebsiella pneumoniae	MDR	Spherical	3	PDT/CQ	Double	Monomer	4	CJ	Gram-	GIT	0	1	1	0	t	0.447154	-0.002	0	0.122397	0.0791961	0.0807547	-0.142944	-0.119615	-0.149459	-0.105615	-0.000738822	-0.000738822	196.967	10.2	2.54	6.1	2.1	24	SC1=NC(N)=CC(N)=N1.Clc1cc2nccc(c2cc1)NC(C)CCCN(CC)CC	J. Am. Chem. Soc. 2013 135 (35) 12940â€“12943"	COMPLEMENTARY	AuSphericalDoubleMonomerPDT/CQ	Gram-GIT
25	0	0	0.0205968	0	0.5	0	0.268748	Au	MBC (uM)	20.308	Klebsiella pneumoniae	MDR	Spherical	3	PDT/CQ	Double	Monomer	10	HI	Gram-	SYS	0	1	1	0	t	0.447154	0.00357143	0.000571429	0.114325	0.0458025	0.0470383	-0.142944	-0.119615	-0.149459	-0.105615	-0.000738822	-0.000738822	196.967	10.2	2.54	6.1	2.1	24	SC1=NC(N)=CC(N)=N1.Clc1cc2nccc(c2cc1)NC(C)CCCN(CC)CC	J. Am. Chem. Soc. 2013 135 (35) 12940â€“12943"	COMPLEMENTARY	AuSphericalDoubleMonomerPDT/CQ	Gram-SYS
25	0	0	1.23969e-09	0	0.5	0	0.266528	Au	MBC (uM)	20.308	Klebsiella pneumoniae	MDR	Spherical	3	PDT/CQ	Double	Monomer	24	ST	Gram+	RES	0	1	1	0	t	0.447154	0.00133333	0.00233333	0.124568	0.0735856	0.0748657	-0.142944	-0.119615	-0.149459	-0.105615	-0.000738822	-0.000738822	196.967	10.2	2.54	6.1	2.1	24	SC1=NC(N)=CC(N)=N1.Clc1cc2nccc(c2cc1)NC(C)CCCN(CC)CC	J. Am. Chem. Soc. 2013 135 (35) 12940â€“12943"	COMPLEMENTARY	AuSphericalDoubleMonomerPDT/CQ	Gram+RES
25	0	0	2.51578e-11	0	0.5	0	0.26558	Au	MBC (uM)	20.308	Klebsiella pneumoniae	MDR	Spherical	3	PDT/CQ	Double	Monomer	9	EF	Gram+	GIT	0	1	1	0	t	0.447154	-0.004	-0.001	0.122096	0.0733832	0.0748523	-0.142944	-0.119615	-0.149459	-0.105615	-0.000738822	-0.000738822	196.967	10.2	2.54	6.1	2.1	24	SC1=NC(N)=CC(N)=N1.Clc1cc2nccc(c2cc1)NC(C)CCCN(CC)CC	J. Am. Chem. Soc. 2013 135 (35) 12940â€“12943"	COMPLEMENTARY	AuSphericalDoubleMonomerPDT/CQ	Gram+GIT
26	0	0	3.3565e-11	0	0.5	0	0.265491	Au	MBC (uM)	20.308	Acinetobacter baumannii	MDR	Spherical	3	PDT/CQ	Double	Monomer	4	CJ	Gram-	GIT	0	1	1	0	t	0.447154	-0.002	0	0.122397	0.0791961	0.0807547	-0.142944	-0.119615	-0.149459	-0.105615	-0.000738822	-0.000738822	196.967	10.2	2.54	6.1	2.1	24	SC1=NC(N)=CC(N)=N1.Clc1cc2nccc(c2cc1)NC(C)CCCN(CC)CC	J. Am. Chem. Soc. 2013 135 (35) 12940â€“12943"	COMPLEMENTARY	AuSphericalDoubleMonomerPDT/CQ	Gram-GIT
26	0	0	1.23969e-09	0	0.5	0	0.266528	Au	MBC (uM)	20.308	Acinetobacter baumannii	MDR	Spherical	3	PDT/CQ	Double	Monomer	24	ST	Gram+	RES	0	1	1	0	t	0.447154	0.00133333	0.00233333	0.124568	0.0735856	0.0748657	-0.142944	-0.119615	-0.149459	-0.105615	-0.000738822	-0.000738822	196.967	10.2	2.54	6.1	2.1	24	SC1=NC(N)=CC(N)=N1.Clc1cc2nccc(c2cc1)NC(C)CCCN(CC)CC	J. Am. Chem. Soc. 2013 135 (35) 12940â€“12943"	COMPLEMENTARY	AuSphericalDoubleMonomerPDT/CQ	Gram+RES
26	0	0	0.0758015	0	0.5	0	0.267413	Au	MBC (uM)	20.308	Acinetobacter baumannii	MDR	Spherical	3	PDT/CQ	Double	Monomer	16	MT	Gram-	RES	0	1	1	0	t	0.447154	-0.009	-0.01	0.0993988	0.0302842	0.0319897	-0.142944	-0.119615	-0.149459	-0.105615	-0.000738822	-0.000738822	196.967	10.2	2.54	6.1	2.1	24	SC1=NC(N)=CC(N)=N1.Clc1cc2nccc(c2cc1)NC(C)CCCN(CC)CC	J. Am. Chem. Soc. 2013 135 (35) 12940â€“12943"	COMPLEMENTARY	AuSphericalDoubleMonomerPDT/CQ	Gram-RES
26	0	0	0.240527	0	0.5	0	0.270636	Au	MBC (uM)	20.308	Acinetobacter baumannii	MDR	Spherical	3	PDT/CQ	Double	Monomer	25	TY	Gram+	SYS	0	1	1	0	t	0.447154	-0.0005	-0.0005	0.10259	0.0124517	0.0135345	-0.142944	-0.119615	-0.149459	-0.105615	-0.000738822	-0.000738822	196.967	10.2	2.54	6.1	2.1	24	SC1=NC(N)=CC(N)=N1.Clc1cc2nccc(c2cc1)NC(C)CCCN(CC)CC	J. Am. Chem. Soc. 2013 135 (35) 12940â€“12943"	COMPLEMENTARY	AuSphericalDoubleMonomerPDT/CQ	Gram+SYS
26	0	0	2.51578e-11	0	0.5	0	0.26558	Au	MBC (uM)	20.308	Acinetobacter baumannii	MDR	Spherical	3	PDT/CQ	Double	Monomer	9	EF	Gram+	GIT	0	1	1	0	t	0.447154	-0.004	-0.001	0.122096	0.0733832	0.0748523	-0.142944	-0.119615	-0.149459	-0.105615	-0.000738822	-0.000738822	196.967	10.2	2.54	6.1	2.1	24	SC1=NC(N)=CC(N)=N1.Clc1cc2nccc(c2cc1)NC(C)CCCN(CC)CC	J. Am. Chem. Soc. 2013 135 (35) 12940â€“12943"	COMPLEMENTARY	AuSphericalDoubleMonomerPDT/CQ	Gram+GIT
26	0	0	1.17239e-14	0	0.5	0	0.26408	Au	MBC (uM)	20.308	Acinetobacter baumannii	MDR	Spherical	3	PDT/CQ	Double	Monomer	6	CT	Gram-	SYS	0	1	1	0	t	0.447154	0.00457143	0.00557143	0.129748	0.11685	0.11775	-0.142944	-0.119615	-0.149459	-0.105615	-0.000738822	-0.000738822	196.967	10.2	2.54	6.1	2.1	24	SC1=NC(N)=CC(N)=N1.Clc1cc2nccc(c2cc1)NC(C)CCCN(CC)CC	J. Am. Chem. Soc. 2013 135 (35) 12940â€“12943"	COMPLEMENTARY	AuSphericalDoubleMonomerPDT/CQ	Gram-SYS
26	0	0	0.0205968	0	0.5	0	0.268748	Au	MBC (uM)	20.308	Acinetobacter baumannii	MDR	Spherical	3	PDT/CQ	Double	Monomer	10	HI	Gram-	SYS	0	1	1	0	t	0.447154	0.00357143	0.000571429	0.114325	0.0458025	0.0470383	-0.142944	-0.119615	-0.149459	-0.105615	-0.000738822	-0.000738822	196.967	10.2	2.54	6.1	2.1	24	SC1=NC(N)=CC(N)=N1.Clc1cc2nccc(c2cc1)NC(C)CCCN(CC)CC	J. Am. Chem. Soc. 2013 135 (35) 12940â€“12943"	COMPLEMENTARY	AuSphericalDoubleMonomerPDT/CQ	Gram-SYS
26	0	0	5.39399e-12	0	0.5	0	0.265287	Au	MBC (uM)	20.308	Acinetobacter baumannii	MDR	Spherical	3	PDT/CQ	Double	Monomer	20	PG	Gram-	SYS	0	1	1	0	t	0.447154	-0.00442857	-0.00142857	0.11973	0.0759019	0.0779623	-0.142944	-0.119615	-0.149459	-0.105615	-0.000738822	-0.000738822	196.967	10.2	2.54	6.1	2.1	24	SC1=NC(N)=CC(N)=N1.Clc1cc2nccc(c2cc1)NC(C)CCCN(CC)CC	J. Am. Chem. Soc. 2013 135 (35) 12940â€“12943"	COMPLEMENTARY	AuSphericalDoubleMonomerPDT/CQ	Gram-SYS
27	1	1	0.568539	1	0.731059	0	0.269716	Au	MBC (uM)	20.308	Escherichia coli	MDR	Spherical	4	PDT/DMB	Double	Monomer	8	EC	Gram-	GIT	1	1	1	1	t	0.447154	-0.004	-0.004	0.100485	0.00996768	0.0108964	-0.142944	-0.119615	-0.149459	-0.118648	-0.000738822	-0.000738822	196.967	10.2	2.54	6.1	2.5	24	SC1=NC(N)=CC(N)=N1.CN(C(NC(N)=N)=N)C	J. Am. Chem. Soc. 2013 135 (35) 12940â€“12943"	COMPLEMENTARY	AuSphericalDoubleMonomerPDT/DMB	Gram-GIT
27	1	1	0.568539	1	0.731059	0	0.269716	Au	MBC (uM)	20.308	Escherichia coli	MDR	Spherical	4	PDT/DMB	Double	Monomer	8	EC	Gram-	GIT	1	1	1	1	t	0.447154	-0.004	-0.004	0.100485	0.00996768	0.0108964	-0.142944	-0.119615	-0.149459	-0.118648	-0.000738822	-0.000738822	196.967	10.2	2.54	6.1	2.5	24	SC1=NC(N)=CC(N)=N1.CN(C(NC(N)=N)=N)C	J. Am. Chem. Soc. 2013 135 (35) 12940â€“12943"	COMPLEMENTARY	AuSphericalDoubleMonomerPDT/DMB	Gram-GIT
27	0	0	0.0577603	0	0.5	0	0.267042	Au	MBC (uM)	20.308	Escherichia coli	MDR	Spherical	4	PDT/DMB	Double	Monomer	16	MT	Gram-	RES	0	1	1	0	t	0.447154	-0.009	-0.01	0.0993988	0.0302842	0.0319897	-0.142944	-0.119615	-0.149459	-0.118648	-0.000738822	-0.000738822	196.967	10.2	2.54	6.1	2.5	24	SC1=NC(N)=CC(N)=N1.CN(C(NC(N)=N)=N)C	J. Am. Chem. Soc. 2013 135 (35) 12940â€“12943"	COMPLEMENTARY	AuSphericalDoubleMonomerPDT/DMB	Gram-RES
27	0	0	7.27407e-12	0	0.5	0	0.266008	Au	MBC (uM)	20.308	Escherichia coli	MDR	Spherical	4	PDT/DMB	Double	Monomer	21	PN	Gram+	RES	0	1	1	0	t	0.447154	-0.000666667	0.00233333	0.123904	0.0718737	0.0736966	-0.142944	-0.119615	-0.149459	-0.118648	-0.000738822	-0.000738822	196.967	10.2	2.54	6.1	2.5	24	SC1=NC(N)=CC(N)=N1.CN(C(NC(N)=N)=N)C	J. Am. Chem. Soc. 2013 135 (35) 12940â€“12943"	COMPLEMENTARY	AuSphericalDoubleMonomerPDT/DMB	Gram+RES
27	0	0	9.26546e-10	0	0.5	0	0.266164	Au	MBC (uM)	20.308	Escherichia coli	MDR	Spherical	4	PDT/DMB	Double	Monomer	24	ST	Gram+	RES	0	1	1	0	t	0.447154	0.00133333	0.00233333	0.124568	0.0735856	0.0748657	-0.142944	-0.119615	-0.149459	-0.118648	-0.000738822	-0.000738822	196.967	10.2	2.54	6.1	2.5	24	SC1=NC(N)=CC(N)=N1.CN(C(NC(N)=N)=N)C	J. Am. Chem. Soc. 2013 135 (35) 12940â€“12943"	COMPLEMENTARY	AuSphericalDoubleMonomerPDT/DMB	Gram+RES
27	1	1	0.568539	1	0.731059	0	0.269716	Au	MBC (uM)	20.308	Escherichia coli	MDR	Spherical	4	PDT/DMB	Double	Monomer	8	EC	Gram-	GIT	1	1	1	1	t	0.447154	-0.004	-0.004	0.100485	0.00996768	0.0108964	-0.142944	-0.119615	-0.149459	-0.118648	-0.000738822	-0.000738822	196.967	10.2	2.54	6.1	2.5	24	SC1=NC(N)=CC(N)=N1.CN(C(NC(N)=N)=N)C	J. Am. Chem. Soc. 2013 135 (35) 12940â€“12943"	COMPLEMENTARY	AuSphericalDoubleMonomerPDT/DMB	Gram-GIT
27	0	0	7.27407e-12	0	0.5	0	0.266008	Au	MBC (uM)	20.308	Escherichia coli	MDR	Spherical	4	PDT/DMB	Double	Monomer	21	PN	Gram+	RES	0	1	1	0	t	0.447154	-0.000666667	0.00233333	0.123904	0.0718737	0.0736966	-0.142944	-0.119615	-0.149459	-0.118648	-0.000738822	-0.000738822	196.967	10.2	2.54	6.1	2.5	24	SC1=NC(N)=CC(N)=N1.CN(C(NC(N)=N)=N)C	J. Am. Chem. Soc. 2013 135 (35) 12940â€“12943"	COMPLEMENTARY	AuSphericalDoubleMonomerPDT/DMB	Gram+RES
27	1	1	0.568539	1	0.731059	0	0.269716	Au	MBC (uM)	20.308	Escherichia coli	MDR	Spherical	4	PDT/DMB	Double	Monomer	8	EC	Gram-	GIT	1	1	1	1	t	0.447154	-0.004	-0.004	0.100485	0.00996768	0.0108964	-0.142944	-0.119615	-0.149459	-0.118648	-0.000738822	-0.000738822	196.967	10.2	2.54	6.1	2.5	24	SC1=NC(N)=CC(N)=N1.CN(C(NC(N)=N)=N)C	J. Am. Chem. Soc. 2013 135 (35) 12940â€“12943"	COMPLEMENTARY	AuSphericalDoubleMonomerPDT/DMB	Gram-GIT
27	0	0	9.26546e-10	0	0.5	0	0.266164	Au	MBC (uM)	20.308	Escherichia coli	MDR	Spherical	4	PDT/DMB	Double	Monomer	24	ST	Gram+	RES	0	1	1	0	t	0.447154	0.00133333	0.00233333	0.124568	0.0735856	0.0748657	-0.142944	-0.119615	-0.149459	-0.118648	-0.000738822	-0.000738822	196.967	10.2	2.54	6.1	2.5	24	SC1=NC(N)=CC(N)=N1.CN(C(NC(N)=N)=N)C	J. Am. Chem. Soc. 2013 135 (35) 12940â€“12943"	COMPLEMENTARY	AuSphericalDoubleMonomerPDT/DMB	Gram+RES
27	0	0	0.1914	0	0.5	0	0.27026	Au	MBC (uM)	20.308	Escherichia coli	MDR	Spherical	4	PDT/DMB	Double	Monomer	25	TY	Gram+	SYS	0	1	1	0	t	0.447154	-0.0005	-0.0005	0.10259	0.0124517	0.0135345	-0.142944	-0.119615	-0.149459	-0.118648	-0.000738822	-0.000738822	196.967	10.2	2.54	6.1	2.5	24	SC1=NC(N)=CC(N)=N1.CN(C(NC(N)=N)=N)C	J. Am. Chem. Soc. 2013 135 (35) 12940â€“12943"	COMPLEMENTARY	AuSphericalDoubleMonomerPDT/DMB	Gram+SYS
27	0	0	0.0577603	0	0.5	0	0.267042	Au	MBC (uM)	20.308	Escherichia coli	MDR	Spherical	4	PDT/DMB	Double	Monomer	16	MT	Gram-	RES	0	1	1	0	t	0.447154	-0.009	-0.01	0.0993988	0.0302842	0.0319897	-0.142944	-0.119615	-0.149459	-0.118648	-0.000738822	-0.000738822	196.967	10.2	2.54	6.1	2.5	24	SC1=NC(N)=CC(N)=N1.CN(C(NC(N)=N)=N)C	J. Am. Chem. Soc. 2013 135 (35) 12940â€“12943"	COMPLEMENTARY	AuSphericalDoubleMonomerPDT/DMB	Gram-RES
27	0	0	1.8803e-11	0	0.5	0	0.265217	Au	MBC (uM)	20.308	Escherichia coli	MDR	Spherical	4	PDT/DMB	Double	Monomer	9	EF	Gram+	GIT	0	1	1	0	t	0.447154	-0.004	-0.001	0.122096	0.0733832	0.0748523	-0.142944	-0.119615	-0.149459	-0.118648	-0.000738822	-0.000738822	196.967	10.2	2.54	6.1	2.5	24	SC1=NC(N)=CC(N)=N1.CN(C(NC(N)=N)=N)C	J. Am. Chem. Soc. 2013 135 (35) 12940â€“12943"	COMPLEMENTARY	AuSphericalDoubleMonomerPDT/DMB	Gram+GIT
27	0	0	4.03149e-12	0	0.5	0	0.264924	Au	MBC (uM)	20.308	Escherichia coli	MDR	Spherical	4	PDT/DMB	Double	Monomer	20	PG	Gram-	SYS	0	1	1	0	t	0.447154	-0.00442857	-0.00142857	0.11973	0.0759019	0.0779623	-0.142944	-0.119615	-0.149459	-0.118648	-0.000738822	-0.000738822	196.967	10.2	2.54	6.1	2.5	24	SC1=NC(N)=CC(N)=N1.CN(C(NC(N)=N)=N)C	J. Am. Chem. Soc. 2013 135 (35) 12940â€“12943"	COMPLEMENTARY	AuSphericalDoubleMonomerPDT/DMB	Gram-SYS
27	0	1	0.765037	1	0.731059	0	0.270885	Au	MBC (uM)	20.308	Escherichia coli	MDR	Spherical	4	PDT/DMB	Double	Monomer	19	PA	Gram-	SYS	0	1	1	0	t	0.447154	0.00657143	0.00357143	0.102611	0.0205758	0.0222078	-0.142944	-0.119615	-0.149459	-0.118648	-0.000738822	-0.000738822	196.967	10.2	2.54	6.1	2.5	24	SC1=NC(N)=CC(N)=N1.CN(C(NC(N)=N)=N)C	J. Am. Chem. Soc. 2013 135 (35) 12940â€“12943"	COMPLEMENTARY	AuSphericalDoubleMonomerPDT/DMB	Gram-SYS
27	0	0	0.0154746	0	0.5	0	0.268378	Au	MBC (uM)	20.308	Escherichia coli	MDR	Spherical	4	PDT/DMB	Double	Monomer	10	HI	Gram-	SYS	0	1	1	0	t	0.447154	0.00357143	0.000571429	0.114325	0.0458025	0.0470383	-0.142944	-0.119615	-0.149459	-0.118648	-0.000738822	-0.000738822	196.967	10.2	2.54	6.1	2.5	24	SC1=NC(N)=CC(N)=N1.CN(C(NC(N)=N)=N)C	J. Am. Chem. Soc. 2013 135 (35) 12940â€“12943"	COMPLEMENTARY	AuSphericalDoubleMonomerPDT/DMB	Gram-SYS
27	0	0	8.76249e-15	0	0.5	0	0.263725	Au	MBC (uM)	20.308	Escherichia coli	MDR	Spherical	4	PDT/DMB	Double	Monomer	6	CT	Gram-	SYS	0	1	1	0	t	0.447154	0.00457143	0.00557143	0.129748	0.11685	0.11775	-0.142944	-0.119615	-0.149459	-0.118648	-0.000738822	-0.000738822	196.967	10.2	2.54	6.1	2.5	24	SC1=NC(N)=CC(N)=N1.CN(C(NC(N)=N)=N)C	J. Am. Chem. Soc. 2013 135 (35) 12940â€“12943"	COMPLEMENTARY	AuSphericalDoubleMonomerPDT/DMB	Gram-SYS
27	0	0	2.50866e-11	0	0.5	0	0.265129	Au	MBC (uM)	20.308	Escherichia coli	MDR	Spherical	4	PDT/DMB	Double	Monomer	4	CJ	Gram-	GIT	0	1	1	0	t	0.447154	-0.002	0	0.122397	0.0791961	0.0807547	-0.142944	-0.119615	-0.149459	-0.118648	-0.000738822	-0.000738822	196.967	10.2	2.54	6.1	2.5	24	SC1=NC(N)=CC(N)=N1.CN(C(NC(N)=N)=N)C	J. Am. Chem. Soc. 2013 135 (35) 12940â€“12943"	COMPLEMENTARY	AuSphericalDoubleMonomerPDT/DMB	Gram-GIT
28	0	0	0.0577603	0	0.5	0	0.267042	Au	MBC (uM)	20.308	Acinetobacter baumannii	MDR	Spherical	4	PDT/DMB	Double	Monomer	16	MT	Gram-	RES	0	1	1	0	t	0.447154	-0.009	-0.01	0.0993988	0.0302842	0.0319897	-0.142944	-0.119615	-0.149459	-0.118648	-0.000738822	-0.000738822	196.967	10.2	2.54	6.1	2.5	24	SC1=NC(N)=CC(N)=N1.CN(C(NC(N)=N)=N)C	J. Am. Chem. Soc. 2013 135 (35) 12940â€“12943"	COMPLEMENTARY	AuSphericalDoubleMonomerPDT/DMB	Gram-RES
28	0	0	2.50866e-11	0	0.5	0	0.265129	Au	MBC (uM)	20.308	Acinetobacter baumannii	MDR	Spherical	4	PDT/DMB	Double	Monomer	4	CJ	Gram-	GIT	0	1	1	0	t	0.447154	-0.002	0	0.122397	0.0791961	0.0807547	-0.142944	-0.119615	-0.149459	-0.118648	-0.000738822	-0.000738822	196.967	10.2	2.54	6.1	2.5	24	SC1=NC(N)=CC(N)=N1.CN(C(NC(N)=N)=N)C	J. Am. Chem. Soc. 2013 135 (35) 12940â€“12943"	COMPLEMENTARY	AuSphericalDoubleMonomerPDT/DMB	Gram-GIT
28	0	0	9.26546e-10	0	0.5	0	0.266164	Au	MBC (uM)	20.308	Acinetobacter baumannii	MDR	Spherical	4	PDT/DMB	Double	Monomer	24	ST	Gram+	RES	0	1	1	0	t	0.447154	0.00133333	0.00233333	0.124568	0.0735856	0.0748657	-0.142944	-0.119615	-0.149459	-0.118648	-0.000738822	-0.000738822	196.967	10.2	2.54	6.1	2.5	24	SC1=NC(N)=CC(N)=N1.CN(C(NC(N)=N)=N)C	J. Am. Chem. Soc. 2013 135 (35) 12940â€“12943"	COMPLEMENTARY	AuSphericalDoubleMonomerPDT/DMB	Gram+RES
28	0	0	0.1914	0	0.5	0	0.27026	Au	MBC (uM)	20.308	Acinetobacter baumannii	MDR	Spherical	4	PDT/DMB	Double	Monomer	25	TY	Gram+	SYS	0	1	1	0	t	0.447154	-0.0005	-0.0005	0.10259	0.0124517	0.0135345	-0.142944	-0.119615	-0.149459	-0.118648	-0.000738822	-0.000738822	196.967	10.2	2.54	6.1	2.5	24	SC1=NC(N)=CC(N)=N1.CN(C(NC(N)=N)=N)C	J. Am. Chem. Soc. 2013 135 (35) 12940â€“12943"	COMPLEMENTARY	AuSphericalDoubleMonomerPDT/DMB	Gram+SYS
28	0	0	1.8803e-11	0	0.5	0	0.265217	Au	MBC (uM)	20.308	Acinetobacter baumannii	MDR	Spherical	4	PDT/DMB	Double	Monomer	9	EF	Gram+	GIT	0	1	1	0	t	0.447154	-0.004	-0.001	0.122096	0.0733832	0.0748523	-0.142944	-0.119615	-0.149459	-0.118648	-0.000738822	-0.000738822	196.967	10.2	2.54	6.1	2.5	24	SC1=NC(N)=CC(N)=N1.CN(C(NC(N)=N)=N)C	J. Am. Chem. Soc. 2013 135 (35) 12940â€“12943"	COMPLEMENTARY	AuSphericalDoubleMonomerPDT/DMB	Gram+GIT
28	0	0	0.0154746	0	0.5	0	0.268378	Au	MBC (uM)	20.308	Acinetobacter baumannii	MDR	Spherical	4	PDT/DMB	Double	Monomer	10	HI	Gram-	SYS	0	1	1	0	t	0.447154	0.00357143	0.000571429	0.114325	0.0458025	0.0470383	-0.142944	-0.119615	-0.149459	-0.118648	-0.000738822	-0.000738822	196.967	10.2	2.54	6.1	2.5	24	SC1=NC(N)=CC(N)=N1.CN(C(NC(N)=N)=N)C	J. Am. Chem. Soc. 2013 135 (35) 12940â€“12943"	COMPLEMENTARY	AuSphericalDoubleMonomerPDT/DMB	Gram-SYS
28	0	0	1.28953e-08	0	0.5	0	0.266172	Au	MBC (uM)	20.308	Acinetobacter baumannii	MDR	Spherical	4	PDT/DMB	Double	Monomer	1	AB	Gram-	GIT	0	1	1	0	t	0.447154	0.003	0.002	0.121641	0.0757609	0.077817	-0.142944	-0.119615	-0.149459	-0.118648	-0.000738822	-0.000738822	196.967	10.2	2.54	6.1	2.5	24	SC1=NC(N)=CC(N)=N1.CN(C(NC(N)=N)=N)C	J. Am. Chem. Soc. 2013 135 (35) 12940â€“12943"	COMPLEMENTARY	AuSphericalDoubleMonomerPDT/DMB	Gram-GIT
29	1	1	0.619251	1	0.731059	0	0.269988	Au	MBC (uM)	20.308	Escherichia coli	MDR	Spherical	5	PDT/CPB	Double	Monomer	8	EC	Gram-	GIT	1	1	1	1	t	0.447154	-0.004	-0.004	0.100485	0.00996768	0.0108964	-0.142944	-0.119615	-0.149459	-0.109226	-0.000738822	-0.000738822	196.967	10.2	2.54	6.1	2.2	24	SC1=NC(N)=CC(N)=N1.N=C(NC(N)=N)NC1=CC(Cl)=CC=C1	J. Am. Chem. Soc. 2013 135 (35) 12940â€“12943"	COMPLEMENTARY	AuSphericalDoubleMonomerPDT/CPB	Gram-GIT
29	1	1	0.619251	1	0.731059	0	0.269988	Au	MBC (uM)	20.308	Escherichia coli	MDR	Spherical	5	PDT/CPB	Double	Monomer	8	EC	Gram-	GIT	1	1	1	1	t	0.447154	-0.004	-0.004	0.100485	0.00996768	0.0108964	-0.142944	-0.119615	-0.149459	-0.109226	-0.000738822	-0.000738822	196.967	10.2	2.54	6.1	2.2	24	SC1=NC(N)=CC(N)=N1.N=C(NC(N)=N)NC1=CC(Cl)=CC=C1	J. Am. Chem. Soc. 2013 135 (35) 12940â€“12943"	COMPLEMENTARY	AuSphericalDoubleMonomerPDT/CPB	Gram-GIT
29	0	0	0.0703399	0	0.5	0	0.26731	Au	MBC (uM)	20.308	Escherichia coli	MDR	Spherical	5	PDT/CPB	Double	Monomer	16	MT	Gram-	RES	0	1	1	0	t	0.447154	-0.009	-0.01	0.0993988	0.0302842	0.0319897	-0.142944	-0.119615	-0.149459	-0.109226	-0.000738822	-0.000738822	196.967	10.2	2.54	6.1	2.2	24	SC1=NC(N)=CC(N)=N1.N=C(NC(N)=N)NC1=CC(Cl)=CC=C1	J. Am. Chem. Soc. 2013 135 (35) 12940â€“12943"	COMPLEMENTARY	AuSphericalDoubleMonomerPDT/CPB	Gram-RES
29	0	0	8.97815e-12	0	0.5	0	0.266271	Au	MBC (uM)	20.308	Escherichia coli	MDR	Spherical	5	PDT/CPB	Double	Monomer	21	PN	Gram+	RES	0	1	1	0	t	0.447154	-0.000666667	0.00233333	0.123904	0.0718737	0.0736966	-0.142944	-0.119615	-0.149459	-0.109226	-0.000738822	-0.000738822	196.967	10.2	2.54	6.1	2.2	24	SC1=NC(N)=CC(N)=N1.N=C(NC(N)=N)NC1=CC(Cl)=CC=C1	J. Am. Chem. Soc. 2013 135 (35) 12940â€“12943"	COMPLEMENTARY	AuSphericalDoubleMonomerPDT/CPB	Gram+RES
29	0	0	1.14361e-09	0	0.5	0	0.266427	Au	MBC (uM)	20.308	Escherichia coli	MDR	Spherical	5	PDT/CPB	Double	Monomer	24	ST	Gram+	RES	0	1	1	0	t	0.447154	0.00133333	0.00233333	0.124568	0.0735856	0.0748657	-0.142944	-0.119615	-0.149459	-0.109226	-0.000738822	-0.000738822	196.967	10.2	2.54	6.1	2.2	24	SC1=NC(N)=CC(N)=N1.N=C(NC(N)=N)NC1=CC(Cl)=CC=C1	J. Am. Chem. Soc. 2013 135 (35) 12940â€“12943"	COMPLEMENTARY	AuSphericalDoubleMonomerPDT/CPB	Gram+RES
29	0	0	1.14361e-09	0	0.5	0	0.266427	Au	MBC (uM)	20.308	Escherichia coli	MDR	Spherical	5	PDT/CPB	Double	Monomer	24	ST	Gram+	RES	0	1	1	0	t	0.447154	0.00133333	0.00233333	0.124568	0.0735856	0.0748657	-0.142944	-0.119615	-0.149459	-0.109226	-0.000738822	-0.000738822	196.967	10.2	2.54	6.1	2.2	24	SC1=NC(N)=CC(N)=N1.N=C(NC(N)=N)NC1=CC(Cl)=CC=C1	J. Am. Chem. Soc. 2013 135 (35) 12940â€“12943"	COMPLEMENTARY	AuSphericalDoubleMonomerPDT/CPB	Gram+RES
29	0	0	8.97815e-12	0	0.5	0	0.266271	Au	MBC (uM)	20.308	Escherichia coli	MDR	Spherical	5	PDT/CPB	Double	Monomer	21	PN	Gram+	RES	0	1	1	0	t	0.447154	-0.000666667	0.00233333	0.123904	0.0718737	0.0736966	-0.142944	-0.119615	-0.149459	-0.109226	-0.000738822	-0.000738822	196.967	10.2	2.54	6.1	2.2	24	SC1=NC(N)=CC(N)=N1.N=C(NC(N)=N)NC1=CC(Cl)=CC=C1	J. Am. Chem. Soc. 2013 135 (35) 12940â€“12943"	COMPLEMENTARY	AuSphericalDoubleMonomerPDT/CPB	Gram+RES
29	1	1	0.619251	1	0.731059	0	0.269988	Au	MBC (uM)	20.308	Escherichia coli	MDR	Spherical	5	PDT/CPB	Double	Monomer	8	EC	Gram-	GIT	1	1	1	1	t	0.447154	-0.004	-0.004	0.100485	0.00996768	0.0108964	-0.142944	-0.119615	-0.149459	-0.109226	-0.000738822	-0.000738822	196.967	10.2	2.54	6.1	2.2	24	SC1=NC(N)=CC(N)=N1.N=C(NC(N)=N)NC1=CC(Cl)=CC=C1	J. Am. Chem. Soc. 2013 135 (35) 12940â€“12943"	COMPLEMENTARY	AuSphericalDoubleMonomerPDT/CPB	Gram-GIT
29	0	0	0.2261	0	0.5	0	0.270531	Au	MBC (uM)	20.308	Escherichia coli	MDR	Spherical	5	PDT/CPB	Double	Monomer	25	TY	Gram+	SYS	0	1	1	0	t	0.447154	-0.0005	-0.0005	0.10259	0.0124517	0.0135345	-0.142944	-0.119615	-0.149459	-0.109226	-0.000738822	-0.000738822	196.967	10.2	2.54	6.1	2.2	24	SC1=NC(N)=CC(N)=N1.N=C(NC(N)=N)NC1=CC(Cl)=CC=C1	J. Am. Chem. Soc. 2013 135 (35) 12940â€“12943"	COMPLEMENTARY	AuSphericalDoubleMonomerPDT/CPB	Gram+SYS
29	0	0	4.97594e-12	0	0.5	0	0.265186	Au	MBC (uM)	20.308	Escherichia coli	MDR	Spherical	5	PDT/CPB	Double	Monomer	20	PG	Gram-	SYS	0	1	1	0	t	0.447154	-0.00442857	-0.00142857	0.11973	0.0759019	0.0779623	-0.142944	-0.119615	-0.149459	-0.109226	-0.000738822	-0.000738822	196.967	10.2	2.54	6.1	2.2	24	SC1=NC(N)=CC(N)=N1.N=C(NC(N)=N)NC1=CC(Cl)=CC=C1	J. Am. Chem. Soc. 2013 135 (35) 12940â€“12943"	COMPLEMENTARY	AuSphericalDoubleMonomerPDT/CPB	Gram-SYS
29	0	0	0.0703399	0	0.5	0	0.26731	Au	MBC (uM)	20.308	Escherichia coli	MDR	Spherical	5	PDT/CPB	Double	Monomer	16	MT	Gram-	RES	0	1	1	0	t	0.447154	-0.009	-0.01	0.0993988	0.0302842	0.0319897	-0.142944	-0.119615	-0.149459	-0.109226	-0.000738822	-0.000738822	196.967	10.2	2.54	6.1	2.2	24	SC1=NC(N)=CC(N)=N1.N=C(NC(N)=N)NC1=CC(Cl)=CC=C1	J. Am. Chem. Soc. 2013 135 (35) 12940â€“12943"	COMPLEMENTARY	AuSphericalDoubleMonomerPDT/CPB	Gram-RES
29	0	0	0.0190308	0	0.5	0	0.268645	Au	MBC (uM)	20.308	Escherichia coli	MDR	Spherical	5	PDT/CPB	Double	Monomer	10	HI	Gram-	SYS	0	1	1	0	t	0.447154	0.00357143	0.000571429	0.114325	0.0458025	0.0470383	-0.142944	-0.119615	-0.149459	-0.109226	-0.000738822	-0.000738822	196.967	10.2	2.54	6.1	2.2	24	SC1=NC(N)=CC(N)=N1.N=C(NC(N)=N)NC1=CC(Cl)=CC=C1	J. Am. Chem. Soc. 2013 135 (35) 12940â€“12943"	COMPLEMENTARY	AuSphericalDoubleMonomerPDT/CPB	Gram-SYS
29	0	0	2.3208e-11	0	0.5	0	0.265479	Au	MBC (uM)	20.308	Escherichia coli	MDR	Spherical	5	PDT/CPB	Double	Monomer	9	EF	Gram+	GIT	0	1	1	0	t	0.447154	-0.004	-0.001	0.122096	0.0733832	0.0748523	-0.142944	-0.119615	-0.149459	-0.109226	-0.000738822	-0.000738822	196.967	10.2	2.54	6.1	2.2	24	SC1=NC(N)=CC(N)=N1.N=C(NC(N)=N)NC1=CC(Cl)=CC=C1	J. Am. Chem. Soc. 2013 135 (35) 12940â€“12943"	COMPLEMENTARY	AuSphericalDoubleMonomerPDT/CPB	Gram+GIT
29	0	1	0.800748	1	0.731059	0	0.271156	Au	MBC (uM)	20.308	Escherichia coli	MDR	Spherical	5	PDT/CPB	Double	Monomer	19	PA	Gram-	SYS	0	1	1	0	t	0.447154	0.00657143	0.00357143	0.102611	0.0205758	0.0222078	-0.142944	-0.119615	-0.149459	-0.109226	-0.000738822	-0.000738822	196.967	10.2	2.54	6.1	2.2	24	SC1=NC(N)=CC(N)=N1.N=C(NC(N)=N)NC1=CC(Cl)=CC=C1	J. Am. Chem. Soc. 2013 135 (35) 12940â€“12943"	COMPLEMENTARY	AuSphericalDoubleMonomerPDT/CPB	Gram-SYS
29	1	1	0.619251	1	0.731059	0	0.269988	Au	MBC (uM)	20.308	Escherichia coli	MDR	Spherical	5	PDT/CPB	Double	Monomer	8	EC	Gram-	GIT	1	1	1	1	t	0.447154	-0.004	-0.004	0.100485	0.00996768	0.0108964	-0.142944	-0.119615	-0.149459	-0.109226	-0.000738822	-0.000738822	196.967	10.2	2.54	6.1	2.2	24	SC1=NC(N)=CC(N)=N1.N=C(NC(N)=N)NC1=CC(Cl)=CC=C1	J. Am. Chem. Soc. 2013 135 (35) 12940â€“12943"	COMPLEMENTARY	AuSphericalDoubleMonomerPDT/CPB	Gram-GIT
30	0	0	0.0703399	0	0.5	0	0.26731	Au	MBC (uM)	20.308	Klebsiella pneumoniae	MDR	Spherical	5	PDT/CPB	Double	Monomer	16	MT	Gram-	RES	0	1	1	0	t	0.447154	-0.009	-0.01	0.0993988	0.0302842	0.0319897	-0.142944	-0.119615	-0.149459	-0.109226	-0.000738822	-0.000738822	196.967	10.2	2.54	6.1	2.2	24	SC1=NC(N)=CC(N)=N1.N=C(NC(N)=N)NC1=CC(Cl)=CC=C1	J. Am. Chem. Soc. 2013 135 (35) 12940â€“12943"	COMPLEMENTARY	AuSphericalDoubleMonomerPDT/CPB	Gram-RES
30	0	0	0.2261	0	0.5	0	0.270531	Au	MBC (uM)	20.308	Klebsiella pneumoniae	MDR	Spherical	5	PDT/CPB	Double	Monomer	25	TY	Gram+	SYS	0	1	1	0	t	0.447154	-0.0005	-0.0005	0.10259	0.0124517	0.0135345	-0.142944	-0.119615	-0.149459	-0.109226	-0.000738822	-0.000738822	196.967	10.2	2.54	6.1	2.2	24	SC1=NC(N)=CC(N)=N1.N=C(NC(N)=N)NC1=CC(Cl)=CC=C1	J. Am. Chem. Soc. 2013 135 (35) 12940â€“12943"	COMPLEMENTARY	AuSphericalDoubleMonomerPDT/CPB	Gram+SYS
30	0	0	0.0190308	0	0.5	0	0.268645	Au	MBC (uM)	20.308	Klebsiella pneumoniae	MDR	Spherical	5	PDT/CPB	Double	Monomer	10	HI	Gram-	SYS	0	1	1	0	t	0.447154	0.00357143	0.000571429	0.114325	0.0458025	0.0470383	-0.142944	-0.119615	-0.149459	-0.109226	-0.000738822	-0.000738822	196.967	10.2	2.54	6.1	2.2	24	SC1=NC(N)=CC(N)=N1.N=C(NC(N)=N)NC1=CC(Cl)=CC=C1	J. Am. Chem. Soc. 2013 135 (35) 12940â€“12943"	COMPLEMENTARY	AuSphericalDoubleMonomerPDT/CPB	Gram-SYS
30	0	0	2.3208e-11	0	0.5	0	0.265479	Au	MBC (uM)	20.308	Klebsiella pneumoniae	MDR	Spherical	5	PDT/CPB	Double	Monomer	9	EF	Gram+	GIT	0	1	1	0	t	0.447154	-0.004	-0.001	0.122096	0.0733832	0.0748523	-0.142944	-0.119615	-0.149459	-0.109226	-0.000738822	-0.000738822	196.967	10.2	2.54	6.1	2.2	24	SC1=NC(N)=CC(N)=N1.N=C(NC(N)=N)NC1=CC(Cl)=CC=C1	J. Am. Chem. Soc. 2013 135 (35) 12940â€“12943"	COMPLEMENTARY	AuSphericalDoubleMonomerPDT/CPB	Gram+GIT
30	0	0	1.14361e-09	0	0.5	0	0.266427	Au	MBC (uM)	20.308	Klebsiella pneumoniae	MDR	Spherical	5	PDT/CPB	Double	Monomer	24	ST	Gram+	RES	0	1	1	0	t	0.447154	0.00133333	0.00233333	0.124568	0.0735856	0.0748657	-0.142944	-0.119615	-0.149459	-0.109226	-0.000738822	-0.000738822	196.967	10.2	2.54	6.1	2.2	24	SC1=NC(N)=CC(N)=N1.N=C(NC(N)=N)NC1=CC(Cl)=CC=C1	J. Am. Chem. Soc. 2013 135 (35) 12940â€“12943"	COMPLEMENTARY	AuSphericalDoubleMonomerPDT/CPB	Gram+RES
30	0	0	1.08153e-14	0	0.5	0	0.263982	Au	MBC (uM)	20.308	Klebsiella pneumoniae	MDR	Spherical	5	PDT/CPB	Double	Monomer	6	CT	Gram-	SYS	0	1	1	0	t	0.447154	0.00457143	0.00557143	0.129748	0.11685	0.11775	-0.142944	-0.119615	-0.149459	-0.109226	-0.000738822	-0.000738822	196.967	10.2	2.54	6.1	2.2	24	SC1=NC(N)=CC(N)=N1.N=C(NC(N)=N)NC1=CC(Cl)=CC=C1	J. Am. Chem. Soc. 2013 135 (35) 12940â€“12943"	COMPLEMENTARY	AuSphericalDoubleMonomerPDT/CPB	Gram-SYS
30	0	0	3.09636e-11	0	0.5	0	0.265391	Au	MBC (uM)	20.308	Klebsiella pneumoniae	MDR	Spherical	5	PDT/CPB	Double	Monomer	4	CJ	Gram-	GIT	0	1	1	0	t	0.447154	-0.002	0	0.122397	0.0791961	0.0807547	-0.142944	-0.119615	-0.149459	-0.109226	-0.000738822	-0.000738822	196.967	10.2	2.54	6.1	2.2	24	SC1=NC(N)=CC(N)=N1.N=C(NC(N)=N)NC1=CC(Cl)=CC=C1	J. Am. Chem. Soc. 2013 135 (35) 12940â€“12943"	COMPLEMENTARY	AuSphericalDoubleMonomerPDT/CPB	Gram-GIT
31	0	0	3.09636e-11	0	0.5	0	0.265391	Au	MBC (uM)	20.308	Acinetobacter baumannii	MDR	Spherical	5	PDT/CPB	Double	Monomer	4	CJ	Gram-	GIT	0	1	1	0	t	0.447154	-0.002	0	0.122397	0.0791961	0.0807547	-0.142944	-0.119615	-0.149459	-0.109226	-0.000738822	-0.000738822	196.967	10.2	2.54	6.1	2.2	24	SC1=NC(N)=CC(N)=N1.N=C(NC(N)=N)NC1=CC(Cl)=CC=C1	J. Am. Chem. Soc. 2013 135 (35) 12940â€“12943"	COMPLEMENTARY	AuSphericalDoubleMonomerPDT/CPB	Gram-GIT
31	0	0	1.14361e-09	0	0.5	0	0.266427	Au	MBC (uM)	20.308	Acinetobacter baumannii	MDR	Spherical	5	PDT/CPB	Double	Monomer	24	ST	Gram+	RES	0	1	1	0	t	0.447154	0.00133333	0.00233333	0.124568	0.0735856	0.0748657	-0.142944	-0.119615	-0.149459	-0.109226	-0.000738822	-0.000738822	196.967	10.2	2.54	6.1	2.2	24	SC1=NC(N)=CC(N)=N1.N=C(NC(N)=N)NC1=CC(Cl)=CC=C1	J. Am. Chem. Soc. 2013 135 (35) 12940â€“12943"	COMPLEMENTARY	AuSphericalDoubleMonomerPDT/CPB	Gram+RES
31	0	0	1.59162e-08	0	0.5	0	0.266435	Au	MBC (uM)	20.308	Acinetobacter baumannii	MDR	Spherical	5	PDT/CPB	Double	Monomer	1	AB	Gram-	GIT	0	1	1	0	t	0.447154	0.003	0.002	0.121641	0.0757609	0.077817	-0.142944	-0.119615	-0.149459	-0.109226	-0.000738822	-0.000738822	196.967	10.2	2.54	6.1	2.2	24	SC1=NC(N)=CC(N)=N1.N=C(NC(N)=N)NC1=CC(Cl)=CC=C1	J. Am. Chem. Soc. 2013 135 (35) 12940â€“12943"	COMPLEMENTARY	AuSphericalDoubleMonomerPDT/CPB	Gram-GIT
31	0	0	0.0703399	0	0.5	0	0.26731	Au	MBC (uM)	20.308	Acinetobacter baumannii	MDR	Spherical	5	PDT/CPB	Double	Monomer	16	MT	Gram-	RES	0	1	1	0	t	0.447154	-0.009	-0.01	0.0993988	0.0302842	0.0319897	-0.142944	-0.119615	-0.149459	-0.109226	-0.000738822	-0.000738822	196.967	10.2	2.54	6.1	2.2	24	SC1=NC(N)=CC(N)=N1.N=C(NC(N)=N)NC1=CC(Cl)=CC=C1	J. Am. Chem. Soc. 2013 135 (35) 12940â€“12943"	COMPLEMENTARY	AuSphericalDoubleMonomerPDT/CPB	Gram-RES
31	0	0	0.2261	0	0.5	0	0.270531	Au	MBC (uM)	20.308	Acinetobacter baumannii	MDR	Spherical	5	PDT/CPB	Double	Monomer	25	TY	Gram+	SYS	0	1	1	0	t	0.447154	-0.0005	-0.0005	0.10259	0.0124517	0.0135345	-0.142944	-0.119615	-0.149459	-0.109226	-0.000738822	-0.000738822	196.967	10.2	2.54	6.1	2.2	24	SC1=NC(N)=CC(N)=N1.N=C(NC(N)=N)NC1=CC(Cl)=CC=C1	J. Am. Chem. Soc. 2013 135 (35) 12940â€“12943"	COMPLEMENTARY	AuSphericalDoubleMonomerPDT/CPB	Gram+SYS
31	0	0	2.3208e-11	0	0.5	0	0.265479	Au	MBC (uM)	20.308	Acinetobacter baumannii	MDR	Spherical	5	PDT/CPB	Double	Monomer	9	EF	Gram+	GIT	0	1	1	0	t	0.447154	-0.004	-0.001	0.122096	0.0733832	0.0748523	-0.142944	-0.119615	-0.149459	-0.109226	-0.000738822	-0.000738822	196.967	10.2	2.54	6.1	2.2	24	SC1=NC(N)=CC(N)=N1.N=C(NC(N)=N)NC1=CC(Cl)=CC=C1	J. Am. Chem. Soc. 2013 135 (35) 12940â€“12943"	COMPLEMENTARY	AuSphericalDoubleMonomerPDT/CPB	Gram+GIT
32	0	0	0.0820624	0	0.5	0	0.267523	Au	MBC (uM)	20.308	Klebsiella pneumoniae	MDR	Spherical	6	PDT/G	Double	Monomer	16	MT	Gram-	RES	0	1	1	0	t	0.447154	-0.009	-0.01	0.0993988	0.0302842	0.0319897	-0.142944	-0.119615	-0.149459	-0.101758	-0.000738822	-0.000738822	196.967	10.2	2.54	6.1	2	24	SC1=NC(N)=CC(N)=N1.NC(N)=N	J. Am. Chem. Soc. 2013 135 (35) 12940â€“12943"	COMPLEMENTARY	AuSphericalDoubleMonomerPDT/G	Gram-RES
32	0	0	0.256616	0	0.5	0	0.270747	Au	MBC (uM)	20.308	Klebsiella pneumoniae	MDR	Spherical	6	PDT/G	Double	Monomer	25	TY	Gram+	SYS	0	1	1	0	t	0.447154	-0.0005	-0.0005	0.10259	0.0124517	0.0135345	-0.142944	-0.119615	-0.149459	-0.101758	-0.000738822	-0.000738822	196.967	10.2	2.54	6.1	2	24	SC1=NC(N)=CC(N)=N1.NC(N)=N	J. Am. Chem. Soc. 2013 135 (35) 12940â€“12943"	COMPLEMENTARY	AuSphericalDoubleMonomerPDT/G	Gram+SYS
32	0	0	0.0224085	0	0.5	0	0.268858	Au	MBC (uM)	20.308	Klebsiella pneumoniae	MDR	Spherical	6	PDT/G	Double	Monomer	10	HI	Gram-	SYS	0	1	1	0	t	0.447154	0.00357143	0.000571429	0.114325	0.0458025	0.0470383	-0.142944	-0.119615	-0.149459	-0.101758	-0.000738822	-0.000738822	196.967	10.2	2.54	6.1	2	24	SC1=NC(N)=CC(N)=N1.NC(N)=N	J. Am. Chem. Soc. 2013 135 (35) 12940â€“12943"	COMPLEMENTARY	AuSphericalDoubleMonomerPDT/G	Gram-SYS
32	0	0	3.65852e-11	0	0.5	0	0.265599	Au	MBC (uM)	20.308	Klebsiella pneumoniae	MDR	Spherical	6	PDT/G	Double	Monomer	4	CJ	Gram-	GIT	0	1	1	0	t	0.447154	-0.002	0	0.122397	0.0791961	0.0807547	-0.142944	-0.119615	-0.149459	-0.101758	-0.000738822	-0.000738822	196.967	10.2	2.54	6.1	2	24	SC1=NC(N)=CC(N)=N1.NC(N)=N	J. Am. Chem. Soc. 2013 135 (35) 12940â€“12943"	COMPLEMENTARY	AuSphericalDoubleMonomerPDT/G	Gram-GIT
32	0	0	2.74214e-11	0	0.5	0	0.265688	Au	MBC (uM)	20.308	Klebsiella pneumoniae	MDR	Spherical	6	PDT/G	Double	Monomer	9	EF	Gram+	GIT	0	1	1	0	t	0.447154	-0.004	-0.001	0.122096	0.0733832	0.0748523	-0.142944	-0.119615	-0.149459	-0.101758	-0.000738822	-0.000738822	196.967	10.2	2.54	6.1	2	24	SC1=NC(N)=CC(N)=N1.NC(N)=N	J. Am. Chem. Soc. 2013 135 (35) 12940â€“12943"	COMPLEMENTARY	AuSphericalDoubleMonomerPDT/G	Gram+GIT
32	0	0	1.35123e-09	0	0.5	0	0.266636	Au	MBC (uM)	20.308	Klebsiella pneumoniae	MDR	Spherical	6	PDT/G	Double	Monomer	24	ST	Gram+	RES	0	1	1	0	t	0.447154	0.00133333	0.00233333	0.124568	0.0735856	0.0748657	-0.142944	-0.119615	-0.149459	-0.101758	-0.000738822	-0.000738822	196.967	10.2	2.54	6.1	2	24	SC1=NC(N)=CC(N)=N1.NC(N)=N	J. Am. Chem. Soc. 2013 135 (35) 12940â€“12943"	COMPLEMENTARY	AuSphericalDoubleMonomerPDT/G	Gram+RES
32	0	0	1.27788e-14	0	0.5	0	0.264186	Au	MBC (uM)	20.308	Klebsiella pneumoniae	MDR	Spherical	6	PDT/G	Double	Monomer	6	CT	Gram-	SYS	0	1	1	0	t	0.447154	0.00457143	0.00557143	0.129748	0.11685	0.11775	-0.142944	-0.119615	-0.149459	-0.101758	-0.000738822	-0.000738822	196.967	10.2	2.54	6.1	2	24	SC1=NC(N)=CC(N)=N1.NC(N)=N	J. Am. Chem. Soc. 2013 135 (35) 12940â€“12943"	COMPLEMENTARY	AuSphericalDoubleMonomerPDT/G	Gram-SYS
33	0	0	0.0224085	0	0.5	0	0.268858	Au	MBC (uM)	20.308	Acinetobacter baumannii	MDR	Spherical	6	PDT/G	Double	Monomer	10	HI	Gram-	SYS	0	1	1	0	t	0.447154	0.00357143	0.000571429	0.114325	0.0458025	0.0470383	-0.142944	-0.119615	-0.149459	-0.101758	-0.000738822	-0.000738822	196.967	10.2	2.54	6.1	2	24	SC1=NC(N)=CC(N)=N1.NC(N)=N	J. Am. Chem. Soc. 2013 135 (35) 12940â€“12943"	COMPLEMENTARY	AuSphericalDoubleMonomerPDT/G	Gram-SYS
33	0	0	0.256616	0	0.5	0	0.270747	Au	MBC (uM)	20.308	Acinetobacter baumannii	MDR	Spherical	6	PDT/G	Double	Monomer	25	TY	Gram+	SYS	0	1	1	0	t	0.447154	-0.0005	-0.0005	0.10259	0.0124517	0.0135345	-0.142944	-0.119615	-0.149459	-0.101758	-0.000738822	-0.000738822	196.967	10.2	2.54	6.1	2	24	SC1=NC(N)=CC(N)=N1.NC(N)=N	J. Am. Chem. Soc. 2013 135 (35) 12940â€“12943"	COMPLEMENTARY	AuSphericalDoubleMonomerPDT/G	Gram+SYS
33	0	0	0.0820624	0	0.5	0	0.267523	Au	MBC (uM)	20.308	Acinetobacter baumannii	MDR	Spherical	6	PDT/G	Double	Monomer	16	MT	Gram-	RES	0	1	1	0	t	0.447154	-0.009	-0.01	0.0993988	0.0302842	0.0319897	-0.142944	-0.119615	-0.149459	-0.101758	-0.000738822	-0.000738822	196.967	10.2	2.54	6.1	2	24	SC1=NC(N)=CC(N)=N1.NC(N)=N	J. Am. Chem. Soc. 2013 135 (35) 12940â€“12943"	COMPLEMENTARY	AuSphericalDoubleMonomerPDT/G	Gram-RES
33	0	0	1.27788e-14	0	0.5	0	0.264186	Au	MBC (uM)	20.308	Acinetobacter baumannii	MDR	Spherical	6	PDT/G	Double	Monomer	6	CT	Gram-	SYS	0	1	1	0	t	0.447154	0.00457143	0.00557143	0.129748	0.11685	0.11775	-0.142944	-0.119615	-0.149459	-0.101758	-0.000738822	-0.000738822	196.967	10.2	2.54	6.1	2	24	SC1=NC(N)=CC(N)=N1.NC(N)=N	J. Am. Chem. Soc. 2013 135 (35) 12940â€“12943"	COMPLEMENTARY	AuSphericalDoubleMonomerPDT/G	Gram-SYS
33	0	0	3.65852e-11	0	0.5	0	0.265599	Au	MBC (uM)	20.308	Acinetobacter baumannii	MDR	Spherical	6	PDT/G	Double	Monomer	4	CJ	Gram-	GIT	0	1	1	0	t	0.447154	-0.002	0	0.122397	0.0791961	0.0807547	-0.142944	-0.119615	-0.149459	-0.101758	-0.000738822	-0.000738822	196.967	10.2	2.54	6.1	2	24	SC1=NC(N)=CC(N)=N1.NC(N)=N	J. Am. Chem. Soc. 2013 135 (35) 12940â€“12943"	COMPLEMENTARY	AuSphericalDoubleMonomerPDT/G	Gram-GIT
33	0	0	1.35123e-09	0	0.5	0	0.266636	Au	MBC (uM)	20.308	Acinetobacter baumannii	MDR	Spherical	6	PDT/G	Double	Monomer	24	ST	Gram+	RES	0	1	1	0	t	0.447154	0.00133333	0.00233333	0.124568	0.0735856	0.0748657	-0.142944	-0.119615	-0.149459	-0.101758	-0.000738822	-0.000738822	196.967	10.2	2.54	6.1	2	24	SC1=NC(N)=CC(N)=N1.NC(N)=N	J. Am. Chem. Soc. 2013 135 (35) 12940â€“12943"	COMPLEMENTARY	AuSphericalDoubleMonomerPDT/G	Gram+RES
33	0	0	0.0224085	0	0.5	0	0.268858	Au	MBC (uM)	20.308	Acinetobacter baumannii	MDR	Spherical	6	PDT/G	Double	Monomer	10	HI	Gram-	SYS	0	1	1	0	t	0.447154	0.00357143	0.000571429	0.114325	0.0458025	0.0470383	-0.142944	-0.119615	-0.149459	-0.101758	-0.000738822	-0.000738822	196.967	10.2	2.54	6.1	2	24	SC1=NC(N)=CC(N)=N1.NC(N)=N	J. Am. Chem. Soc. 2013 135 (35) 12940â€“12943"	COMPLEMENTARY	AuSphericalDoubleMonomerPDT/G	Gram-SYS
33	0	0	2.74214e-11	0	0.5	0	0.265688	Au	MBC (uM)	20.308	Acinetobacter baumannii	MDR	Spherical	6	PDT/G	Double	Monomer	9	EF	Gram+	GIT	0	1	1	0	t	0.447154	-0.004	-0.001	0.122096	0.0733832	0.0748523	-0.142944	-0.119615	-0.149459	-0.101758	-0.000738822	-0.000738822	196.967	10.2	2.54	6.1	2	24	SC1=NC(N)=CC(N)=N1.NC(N)=N	J. Am. Chem. Soc. 2013 135 (35) 12940â€“12943"	COMPLEMENTARY	AuSphericalDoubleMonomerPDT/G	Gram+GIT
34	0	0	0.0416181	0	0.5	0	0.266617	Au	MBC (uM)	40.6159	Klebsiella pneumoniae	ATCC13883	Spherical	7	PDT	Single	Monomer	16	MT	Gram-	RES	0	1	1	0	t	0.447154	-0.009	-0.01	0.0993988	0.0302842	0.0319897	-0.142944	-0.119615	-0.149459	-0.133639	0.000813959	-0.000847443	196.967	10.2	2.54	6.1	3.2	24	SC1=NC(N)=CC(N)=N1	J. Am. Chem. Soc. 2013 135 (35) 12940â€“12943"	COMPLEMENTARY	AuSphericalSingleMonomerPDT	Gram-RES
34	0	0	0.143601	0	0.5	0	0.269829	Au	MBC (uM)	40.6159	Klebsiella pneumoniae	ATCC13883	Spherical	7	PDT	Single	Monomer	25	TY	Gram+	SYS	0	1	1	0	t	0.447154	-0.0005	-0.0005	0.10259	0.0124517	0.0135345	-0.142944	-0.119615	-0.149459	-0.133639	0.000813959	-0.000847443	196.967	10.2	2.54	6.1	3.2	24	SC1=NC(N)=CC(N)=N1	J. Am. Chem. Soc. 2013 135 (35) 12940â€“12943"	COMPLEMENTARY	AuSphericalSingleMonomerPDT	Gram+SYS
34	0	0	0.0416181	0	0.5	0	0.266617	Au	MBC (uM)	40.6159	Klebsiella pneumoniae	ATCC13883	Spherical	7	PDT	Single	Monomer	16	MT	Gram-	RES	0	1	1	0	t	0.447154	-0.009	-0.01	0.0993988	0.0302842	0.0319897	-0.142944	-0.119615	-0.149459	-0.133639	0.000813959	-0.000847443	196.967	10.2	2.54	6.1	3.2	24	SC1=NC(N)=CC(N)=N1	J. Am. Chem. Soc. 2013 135 (35) 12940â€“12943"	COMPLEMENTARY	AuSphericalSingleMonomerPDT	Gram-RES
34	0	0	1.77712e-11	0	0.5	0	0.264714	Au	MBC (uM)	40.6159	Klebsiella pneumoniae	ATCC13883	Spherical	7	PDT	Single	Monomer	4	CJ	Gram-	GIT	0	1	1	0	t	0.447154	-0.002	0	0.122397	0.0791961	0.0807547	-0.142944	-0.119615	-0.149459	-0.133639	0.000813959	-0.000847443	196.967	10.2	2.54	6.1	3.2	24	SC1=NC(N)=CC(N)=N1	J. Am. Chem. Soc. 2013 135 (35) 12940â€“12943"	COMPLEMENTARY	AuSphericalSingleMonomerPDT	Gram-GIT
34	0	0	6.5636e-10	0	0.5	0	0.265747	Au	MBC (uM)	40.6159	Klebsiella pneumoniae	ATCC13883	Spherical	7	PDT	Single	Monomer	24	ST	Gram+	RES	0	1	1	0	t	0.447154	0.00133333	0.00233333	0.124568	0.0735856	0.0748657	-0.142944	-0.119615	-0.149459	-0.133639	0.000813959	-0.000847443	196.967	10.2	2.54	6.1	3.2	24	SC1=NC(N)=CC(N)=N1	J. Am. Chem. Soc. 2013 135 (35) 12940â€“12943"	COMPLEMENTARY	AuSphericalSingleMonomerPDT	Gram+RES
34	0	0	0.0110118	0	0.5	0	0.267954	Au	MBC (uM)	40.6159	Klebsiella pneumoniae	ATCC13883	Spherical	7	PDT	Single	Monomer	10	HI	Gram-	SYS	0	1	1	0	t	0.447154	0.00357143	0.000571429	0.114325	0.0458025	0.0470383	-0.142944	-0.119615	-0.149459	-0.133639	0.000813959	-0.000847443	196.967	10.2	2.54	6.1	3.2	24	SC1=NC(N)=CC(N)=N1	J. Am. Chem. Soc. 2013 135 (35) 12940â€“12943"	COMPLEMENTARY	AuSphericalSingleMonomerPDT	Gram-SYS
34	0	0	6.20731e-15	0	0.5	0	0.263319	Au	MBC (uM)	40.6159	Klebsiella pneumoniae	ATCC13883	Spherical	7	PDT	Single	Monomer	6	CT	Gram-	SYS	0	1	1	0	t	0.447154	0.00457143	0.00557143	0.129748	0.11685	0.11775	-0.142944	-0.119615	-0.149459	-0.133639	0.000813959	-0.000847443	196.967	10.2	2.54	6.1	3.2	24	SC1=NC(N)=CC(N)=N1	J. Am. Chem. Soc. 2013 135 (35) 12940â€“12943"	COMPLEMENTARY	AuSphericalSingleMonomerPDT	Gram-SYS
35	0	0	0.0416181	0	0.5	0	0.266617	Au	MBC (uM)	40.6159	Acinetobacter baumannii	MDR	Spherical	7	PDT	Single	Monomer	16	MT	Gram-	RES	0	1	1	0	t	0.447154	-0.009	-0.01	0.0993988	0.0302842	0.0319897	-0.142944	-0.119615	-0.149459	-0.133639	0.000813959	-0.000847443	196.967	10.2	2.54	6.1	3.2	24	SC1=NC(N)=CC(N)=N1	J. Am. Chem. Soc. 2013 135 (35) 12940â€“12943"	COMPLEMENTARY	AuSphericalSingleMonomerPDT	Gram-RES
35	0	0	6.20731e-15	0	0.5	0	0.263319	Au	MBC (uM)	40.6159	Acinetobacter baumannii	MDR	Spherical	7	PDT	Single	Monomer	6	CT	Gram-	SYS	0	1	1	0	t	0.447154	0.00457143	0.00557143	0.129748	0.11685	0.11775	-0.142944	-0.119615	-0.149459	-0.133639	0.000813959	-0.000847443	196.967	10.2	2.54	6.1	3.2	24	SC1=NC(N)=CC(N)=N1	J. Am. Chem. Soc. 2013 135 (35) 12940â€“12943"	COMPLEMENTARY	AuSphericalSingleMonomerPDT	Gram-SYS
35	0	0	1.77712e-11	0	0.5	0	0.264714	Au	MBC (uM)	40.6159	Acinetobacter baumannii	MDR	Spherical	7	PDT	Single	Monomer	4	CJ	Gram-	GIT	0	1	1	0	t	0.447154	-0.002	0	0.122397	0.0791961	0.0807547	-0.142944	-0.119615	-0.149459	-0.133639	0.000813959	-0.000847443	196.967	10.2	2.54	6.1	3.2	24	SC1=NC(N)=CC(N)=N1	J. Am. Chem. Soc. 2013 135 (35) 12940â€“12943"	COMPLEMENTARY	AuSphericalSingleMonomerPDT	Gram-GIT
35	0	0	6.5636e-10	0	0.5	0	0.265747	Au	MBC (uM)	40.6159	Acinetobacter baumannii	MDR	Spherical	7	PDT	Single	Monomer	24	ST	Gram+	RES	0	1	1	0	t	0.447154	0.00133333	0.00233333	0.124568	0.0735856	0.0748657	-0.142944	-0.119615	-0.149459	-0.133639	0.000813959	-0.000847443	196.967	10.2	2.54	6.1	3.2	24	SC1=NC(N)=CC(N)=N1	J. Am. Chem. Soc. 2013 135 (35) 12940â€“12943"	COMPLEMENTARY	AuSphericalSingleMonomerPDT	Gram+RES
35	0	0	0.143601	0	0.5	0	0.269829	Au	MBC (uM)	40.6159	Acinetobacter baumannii	MDR	Spherical	7	PDT	Single	Monomer	25	TY	Gram+	SYS	0	1	1	0	t	0.447154	-0.0005	-0.0005	0.10259	0.0124517	0.0135345	-0.142944	-0.119615	-0.149459	-0.133639	0.000813959	-0.000847443	196.967	10.2	2.54	6.1	3.2	24	SC1=NC(N)=CC(N)=N1	J. Am. Chem. Soc. 2013 135 (35) 12940â€“12943"	COMPLEMENTARY	AuSphericalSingleMonomerPDT	Gram+SYS
35	0	0	1.332e-11	0	0.5	0	0.264801	Au	MBC (uM)	40.6159	Acinetobacter baumannii	MDR	Spherical	7	PDT	Single	Monomer	9	EF	Gram+	GIT	0	1	1	0	t	0.447154	-0.004	-0.001	0.122096	0.0733832	0.0748523	-0.142944	-0.119615	-0.149459	-0.133639	0.000813959	-0.000847443	196.967	10.2	2.54	6.1	3.2	24	SC1=NC(N)=CC(N)=N1	J. Am. Chem. Soc. 2013 135 (35) 12940â€“12943"	COMPLEMENTARY	AuSphericalSingleMonomerPDT	Gram+GIT
35	0	0	9.13495e-09	0	0.5	0	0.265755	Au	MBC (uM)	40.6159	Acinetobacter baumannii	MDR	Spherical	7	PDT	Single	Monomer	1	AB	Gram-	GIT	0	1	1	0	t	0.447154	0.003	0.002	0.121641	0.0757609	0.077817	-0.142944	-0.119615	-0.149459	-0.133639	0.000813959	-0.000847443	196.967	10.2	2.54	6.1	3.2	24	SC1=NC(N)=CC(N)=N1	J. Am. Chem. Soc. 2013 135 (35) 12940â€“12943"	COMPLEMENTARY	AuSphericalSingleMonomerPDT	Gram-GIT
35	0	0	0.0110118	0	0.5	0	0.267954	Au	MBC (uM)	40.6159	Acinetobacter baumannii	MDR	Spherical	7	PDT	Single	Monomer	10	HI	Gram-	SYS	0	1	1	0	t	0.447154	0.00357143	0.000571429	0.114325	0.0458025	0.0470383	-0.142944	-0.119615	-0.149459	-0.133639	0.000813959	-0.000847443	196.967	10.2	2.54	6.1	3.2	24	SC1=NC(N)=CC(N)=N1	J. Am. Chem. Soc. 2013 135 (35) 12940â€“12943"	COMPLEMENTARY	AuSphericalSingleMonomerPDT	Gram-SYS
36	0	0	0.0974688	0	0.5	0	0.267764	Au	MBC (uM)	40.6159	Klebsiella pneumoniae	ATCC13883	Spherical	1	PDT/Mel	Double	Monomer	16	MT	Gram-	RES	0	1	1	0	t	0.447154	-0.009	-0.01	0.0993988	0.0302842	0.0319897	-0.142944	-0.119615	-0.149459	-0.0932976	-0.000738822	-0.000738822	196.967	10.2	2.54	6.1	1.8	24	SC1=NC(N)=CC(N)=N1.c1(nc(nc(n1)N)N)N	J. Am. Chem. Soc. 2013 135 (35) 12940â€“12943"	COMPLEMENTARY	AuSphericalDoubleMonomerPDT/Mel	Gram-RES
36	0	0	0.294287	0	0.5	0	0.270991	Au	MBC (uM)	40.6159	Klebsiella pneumoniae	ATCC13883	Spherical	1	PDT/Mel	Double	Monomer	25	TY	Gram+	SYS	0	1	1	0	t	0.447154	-0.0005	-0.0005	0.10259	0.0124517	0.0135345	-0.142944	-0.119615	-0.149459	-0.0932976	-0.000738822	-0.000738822	196.967	10.2	2.54	6.1	1.8	24	SC1=NC(N)=CC(N)=N1.c1(nc(nc(n1)N)N)N	J. Am. Chem. Soc. 2013 135 (35) 12940â€“12943"	COMPLEMENTARY	AuSphericalDoubleMonomerPDT/Mel	Gram+SYS
36	0	0	3.31255e-11	0	0.5	0	0.265925	Au	MBC (uM)	40.6159	Klebsiella pneumoniae	ATCC13883	Spherical	1	PDT/Mel	Double	Monomer	9	EF	Gram+	GIT	0	1	1	0	t	0.447154	-0.004	-0.001	0.122096	0.0733832	0.0748523	-0.142944	-0.119615	-0.149459	-0.0932976	-0.000738822	-0.000738822	196.967	10.2	2.54	6.1	1.8	24	SC1=NC(N)=CC(N)=N1.c1(nc(nc(n1)N)N)N	J. Am. Chem. Soc. 2013 135 (35) 12940â€“12943"	COMPLEMENTARY	AuSphericalDoubleMonomerPDT/Mel	Gram+GIT
36	0	0	0.0974688	0	0.5	0	0.267764	Au	MBC (uM)	40.6159	Klebsiella pneumoniae	ATCC13883	Spherical	1	PDT/Mel	Double	Monomer	16	MT	Gram-	RES	0	1	1	0	t	0.447154	-0.009	-0.01	0.0993988	0.0302842	0.0319897	-0.142944	-0.119615	-0.149459	-0.0932976	-0.000738822	-0.000738822	196.967	10.2	2.54	6.1	1.8	24	SC1=NC(N)=CC(N)=N1.c1(nc(nc(n1)N)N)N	J. Am. Chem. Soc. 2013 135 (35) 12940â€“12943"	COMPLEMENTARY	AuSphericalDoubleMonomerPDT/Mel	Gram-RES
36	0	0	4.41955e-11	0	0.5	0	0.265835	Au	MBC (uM)	40.6159	Klebsiella pneumoniae	ATCC13883	Spherical	1	PDT/Mel	Double	Monomer	4	CJ	Gram-	GIT	0	1	1	0	t	0.447154	-0.002	0	0.122397	0.0791961	0.0807547	-0.142944	-0.119615	-0.149459	-0.0932976	-0.000738822	-0.000738822	196.967	10.2	2.54	6.1	1.8	24	SC1=NC(N)=CC(N)=N1.c1(nc(nc(n1)N)N)N	J. Am. Chem. Soc. 2013 135 (35) 12940â€“12943"	COMPLEMENTARY	AuSphericalDoubleMonomerPDT/Mel	Gram-GIT
36	0	0	0.0269442	0	0.5	0	0.269099	Au	MBC (uM)	40.6159	Klebsiella pneumoniae	ATCC13883	Spherical	1	PDT/Mel	Double	Monomer	10	HI	Gram-	SYS	0	1	1	0	t	0.447154	0.00357143	0.000571429	0.114325	0.0458025	0.0470383	-0.142944	-0.119615	-0.149459	-0.0932976	-0.000738822	-0.000738822	196.967	10.2	2.54	6.1	1.8	24	SC1=NC(N)=CC(N)=N1.c1(nc(nc(n1)N)N)N	J. Am. Chem. Soc. 2013 135 (35) 12940â€“12943"	COMPLEMENTARY	AuSphericalDoubleMonomerPDT/Mel	Gram-SYS
36	0	0	1.63231e-09	0	0.5	0	0.266874	Au	MBC (uM)	40.6159	Klebsiella pneumoniae	ATCC13883	Spherical	1	PDT/Mel	Double	Monomer	24	ST	Gram+	RES	0	1	1	0	t	0.447154	0.00133333	0.00233333	0.124568	0.0735856	0.0748657	-0.142944	-0.119615	-0.149459	-0.0932976	-0.000738822	-0.000738822	196.967	10.2	2.54	6.1	1.8	24	SC1=NC(N)=CC(N)=N1.c1(nc(nc(n1)N)N)N	J. Am. Chem. Soc. 2013 135 (35) 12940â€“12943"	COMPLEMENTARY	AuSphericalDoubleMonomerPDT/Mel	Gram+RES
36	0	0	1.5437e-14	0	0.5	0	0.264417	Au	MBC (uM)	40.6159	Klebsiella pneumoniae	ATCC13883	Spherical	1	PDT/Mel	Double	Monomer	6	CT	Gram-	SYS	0	1	1	0	t	0.447154	0.00457143	0.00557143	0.129748	0.11685	0.11775	-0.142944	-0.119615	-0.149459	-0.0932976	-0.000738822	-0.000738822	196.967	10.2	2.54	6.1	1.8	24	SC1=NC(N)=CC(N)=N1.c1(nc(nc(n1)N)N)N	J. Am. Chem. Soc. 2013 135 (35) 12940â€“12943"	COMPLEMENTARY	AuSphericalDoubleMonomerPDT/Mel	Gram-SYS
37	0	0	0.0703399	0	0.5	0	0.26731	Au	MBC (uM)	40.6159	Klebsiella pneumoniae	ATCC13883	Spherical	2	PDT/ACh	Double	Monomer	16	MT	Gram-	RES	0	1	1	0	t	0.447154	-0.009	-0.01	0.0993988	0.0302842	0.0319897	-0.142944	-0.119615	-0.149459	-0.109226	-0.000738822	-0.000738822	196.967	10.2	2.54	6.1	2.2	24	SC1=NC(N)=CC(N)=N1.CC(=O)OCC[N+](C)(C)C	J. Am. Chem. Soc. 2013 135 (35) 12940â€“12943"	COMPLEMENTARY	AuSphericalDoubleMonomerPDT/ACh	Gram-RES
37	0	0	0.2261	0	0.5	0	0.270531	Au	MBC (uM)	40.6159	Klebsiella pneumoniae	ATCC13883	Spherical	2	PDT/ACh	Double	Monomer	25	TY	Gram+	SYS	0	1	1	0	t	0.447154	-0.0005	-0.0005	0.10259	0.0124517	0.0135345	-0.142944	-0.119615	-0.149459	-0.109226	-0.000738822	-0.000738822	196.967	10.2	2.54	6.1	2.2	24	SC1=NC(N)=CC(N)=N1.CC(=O)OCC[N+](C)(C)C	J. Am. Chem. Soc. 2013 135 (35) 12940â€“12943"	COMPLEMENTARY	AuSphericalDoubleMonomerPDT/ACh	Gram+SYS
37	0	0	2.3208e-11	0	0.5	0	0.265479	Au	MBC (uM)	40.6159	Klebsiella pneumoniae	ATCC13883	Spherical	2	PDT/ACh	Double	Monomer	9	EF	Gram+	GIT	0	1	1	0	t	0.447154	-0.004	-0.001	0.122096	0.0733832	0.0748523	-0.142944	-0.119615	-0.149459	-0.109226	-0.000738822	-0.000738822	196.967	10.2	2.54	6.1	2.2	24	SC1=NC(N)=CC(N)=N1.CC(=O)OCC[N+](C)(C)C	J. Am. Chem. Soc. 2013 135 (35) 12940â€“12943"	COMPLEMENTARY	AuSphericalDoubleMonomerPDT/ACh	Gram+GIT
37	0	0	0.0703399	0	0.5	0	0.26731	Au	MBC (uM)	40.6159	Klebsiella pneumoniae	ATCC13883	Spherical	2	PDT/ACh	Double	Monomer	16	MT	Gram-	RES	0	1	1	0	t	0.447154	-0.009	-0.01	0.0993988	0.0302842	0.0319897	-0.142944	-0.119615	-0.149459	-0.109226	-0.000738822	-0.000738822	196.967	10.2	2.54	6.1	2.2	24	SC1=NC(N)=CC(N)=N1.CC(=O)OCC[N+](C)(C)C	J. Am. Chem. Soc. 2013 135 (35) 12940â€“12943"	COMPLEMENTARY	AuSphericalDoubleMonomerPDT/ACh	Gram-RES
37	0	0	3.09636e-11	0	0.5	0	0.265391	Au	MBC (uM)	40.6159	Klebsiella pneumoniae	ATCC13883	Spherical	2	PDT/ACh	Double	Monomer	4	CJ	Gram-	GIT	0	1	1	0	t	0.447154	-0.002	0	0.122397	0.0791961	0.0807547	-0.142944	-0.119615	-0.149459	-0.109226	-0.000738822	-0.000738822	196.967	10.2	2.54	6.1	2.2	24	SC1=NC(N)=CC(N)=N1.CC(=O)OCC[N+](C)(C)C	J. Am. Chem. Soc. 2013 135 (35) 12940â€“12943"	COMPLEMENTARY	AuSphericalDoubleMonomerPDT/ACh	Gram-GIT
37	0	0	0.0190308	0	0.5	0	0.268645	Au	MBC (uM)	40.6159	Klebsiella pneumoniae	ATCC13883	Spherical	2	PDT/ACh	Double	Monomer	10	HI	Gram-	SYS	0	1	1	0	t	0.447154	0.00357143	0.000571429	0.114325	0.0458025	0.0470383	-0.142944	-0.119615	-0.149459	-0.109226	-0.000738822	-0.000738822	196.967	10.2	2.54	6.1	2.2	24	SC1=NC(N)=CC(N)=N1.CC(=O)OCC[N+](C)(C)C	J. Am. Chem. Soc. 2013 135 (35) 12940â€“12943"	COMPLEMENTARY	AuSphericalDoubleMonomerPDT/ACh	Gram-SYS
37	0	0	1.14361e-09	0	0.5	0	0.266427	Au	MBC (uM)	40.6159	Klebsiella pneumoniae	ATCC13883	Spherical	2	PDT/ACh	Double	Monomer	24	ST	Gram+	RES	0	1	1	0	t	0.447154	0.00133333	0.00233333	0.124568	0.0735856	0.0748657	-0.142944	-0.119615	-0.149459	-0.109226	-0.000738822	-0.000738822	196.967	10.2	2.54	6.1	2.2	24	SC1=NC(N)=CC(N)=N1.CC(=O)OCC[N+](C)(C)C	J. Am. Chem. Soc. 2013 135 (35) 12940â€“12943"	COMPLEMENTARY	AuSphericalDoubleMonomerPDT/ACh	Gram+RES
37	0	0	1.08153e-14	0	0.5	0	0.263982	Au	MBC (uM)	40.6159	Klebsiella pneumoniae	ATCC13883	Spherical	2	PDT/ACh	Double	Monomer	6	CT	Gram-	SYS	0	1	1	0	t	0.447154	0.00457143	0.00557143	0.129748	0.11685	0.11775	-0.142944	-0.119615	-0.149459	-0.109226	-0.000738822	-0.000738822	196.967	10.2	2.54	6.1	2.2	24	SC1=NC(N)=CC(N)=N1.CC(=O)OCC[N+](C)(C)C	J. Am. Chem. Soc. 2013 135 (35) 12940â€“12943"	COMPLEMENTARY	AuSphericalDoubleMonomerPDT/ACh	Gram-SYS
38	0	0	0.240527	0	0.5	0	0.270636	Au	MBC (uM)	40.6159	Klebsiella pneumoniae	ATCC13883	Spherical	3	PDT/CQ	Double	Monomer	25	TY	Gram+	SYS	0	1	1	0	t	0.447154	-0.0005	-0.0005	0.10259	0.0124517	0.0135345	-0.142944	-0.119615	-0.149459	-0.105615	-0.000738822	-0.000738822	196.967	10.2	2.54	6.1	2.1	24	SC1=NC(N)=CC(N)=N1.Clc1cc2nccc(c2cc1)NC(C)CCCN(CC)CC	J. Am. Chem. Soc. 2013 135 (35) 12940â€“12943"	COMPLEMENTARY	AuSphericalDoubleMonomerPDT/CQ	Gram+SYS
38	0	0	0.0205968	0	0.5	0	0.268748	Au	MBC (uM)	40.6159	Klebsiella pneumoniae	ATCC13883	Spherical	3	PDT/CQ	Double	Monomer	10	HI	Gram-	SYS	0	1	1	0	t	0.447154	0.00357143	0.000571429	0.114325	0.0458025	0.0470383	-0.142944	-0.119615	-0.149459	-0.105615	-0.000738822	-0.000738822	196.967	10.2	2.54	6.1	2.1	24	SC1=NC(N)=CC(N)=N1.Clc1cc2nccc(c2cc1)NC(C)CCCN(CC)CC	J. Am. Chem. Soc. 2013 135 (35) 12940â€“12943"	COMPLEMENTARY	AuSphericalDoubleMonomerPDT/CQ	Gram-SYS
38	0	0	3.3565e-11	0	0.5	0	0.265491	Au	MBC (uM)	40.6159	Klebsiella pneumoniae	ATCC13883	Spherical	3	PDT/CQ	Double	Monomer	4	CJ	Gram-	GIT	0	1	1	0	t	0.447154	-0.002	0	0.122397	0.0791961	0.0807547	-0.142944	-0.119615	-0.149459	-0.105615	-0.000738822	-0.000738822	196.967	10.2	2.54	6.1	2.1	24	SC1=NC(N)=CC(N)=N1.Clc1cc2nccc(c2cc1)NC(C)CCCN(CC)CC	J. Am. Chem. Soc. 2013 135 (35) 12940â€“12943"	COMPLEMENTARY	AuSphericalDoubleMonomerPDT/CQ	Gram-GIT
38	0	0	0.0758015	0	0.5	0	0.267413	Au	MBC (uM)	40.6159	Klebsiella pneumoniae	ATCC13883	Spherical	3	PDT/CQ	Double	Monomer	16	MT	Gram-	RES	0	1	1	0	t	0.447154	-0.009	-0.01	0.0993988	0.0302842	0.0319897	-0.142944	-0.119615	-0.149459	-0.105615	-0.000738822	-0.000738822	196.967	10.2	2.54	6.1	2.1	24	SC1=NC(N)=CC(N)=N1.Clc1cc2nccc(c2cc1)NC(C)CCCN(CC)CC	J. Am. Chem. Soc. 2013 135 (35) 12940â€“12943"	COMPLEMENTARY	AuSphericalDoubleMonomerPDT/CQ	Gram-RES
38	0	0	2.51578e-11	0	0.5	0	0.26558	Au	MBC (uM)	40.6159	Klebsiella pneumoniae	ATCC13883	Spherical	3	PDT/CQ	Double	Monomer	9	EF	Gram+	GIT	0	1	1	0	t	0.447154	-0.004	-0.001	0.122096	0.0733832	0.0748523	-0.142944	-0.119615	-0.149459	-0.105615	-0.000738822	-0.000738822	196.967	10.2	2.54	6.1	2.1	24	SC1=NC(N)=CC(N)=N1.Clc1cc2nccc(c2cc1)NC(C)CCCN(CC)CC	J. Am. Chem. Soc. 2013 135 (35) 12940â€“12943"	COMPLEMENTARY	AuSphericalDoubleMonomerPDT/CQ	Gram+GIT
38	0	0	1.23969e-09	0	0.5	0	0.266528	Au	MBC (uM)	40.6159	Klebsiella pneumoniae	ATCC13883	Spherical	3	PDT/CQ	Double	Monomer	24	ST	Gram+	RES	0	1	1	0	t	0.447154	0.00133333	0.00233333	0.124568	0.0735856	0.0748657	-0.142944	-0.119615	-0.149459	-0.105615	-0.000738822	-0.000738822	196.967	10.2	2.54	6.1	2.1	24	SC1=NC(N)=CC(N)=N1.Clc1cc2nccc(c2cc1)NC(C)CCCN(CC)CC	J. Am. Chem. Soc. 2013 135 (35) 12940â€“12943"	COMPLEMENTARY	AuSphericalDoubleMonomerPDT/CQ	Gram+RES
38	0	0	1.17239e-14	0	0.5	0	0.26408	Au	MBC (uM)	40.6159	Klebsiella pneumoniae	ATCC13883	Spherical	3	PDT/CQ	Double	Monomer	6	CT	Gram-	SYS	0	1	1	0	t	0.447154	0.00457143	0.00557143	0.129748	0.11685	0.11775	-0.142944	-0.119615	-0.149459	-0.105615	-0.000738822	-0.000738822	196.967	10.2	2.54	6.1	2.1	24	SC1=NC(N)=CC(N)=N1.Clc1cc2nccc(c2cc1)NC(C)CCCN(CC)CC	J. Am. Chem. Soc. 2013 135 (35) 12940â€“12943"	COMPLEMENTARY	AuSphericalDoubleMonomerPDT/CQ	Gram-SYS
39	0	0	0.0577603	0	0.5	0	0.267042	Au	MBC (uM)	40.6159	Klebsiella pneumoniae	ATCC13883	Spherical	4	PDT/DMB	Double	Monomer	16	MT	Gram-	RES	0	1	1	0	t	0.447154	-0.009	-0.01	0.0993988	0.0302842	0.0319897	-0.142944	-0.119615	-0.149459	-0.118648	-0.000738822	-0.000738822	196.967	10.2	2.54	6.1	2.5	24	SC1=NC(N)=CC(N)=N1.CN(C(NC(N)=N)=N)C	J. Am. Chem. Soc. 2013 135 (35) 12940â€“12943"	COMPLEMENTARY	AuSphericalDoubleMonomerPDT/DMB	Gram-RES
39	0	0	0.1914	0	0.5	0	0.27026	Au	MBC (uM)	40.6159	Klebsiella pneumoniae	ATCC13883	Spherical	4	PDT/DMB	Double	Monomer	25	TY	Gram+	SYS	0	1	1	0	t	0.447154	-0.0005	-0.0005	0.10259	0.0124517	0.0135345	-0.142944	-0.119615	-0.149459	-0.118648	-0.000738822	-0.000738822	196.967	10.2	2.54	6.1	2.5	24	SC1=NC(N)=CC(N)=N1.CN(C(NC(N)=N)=N)C	J. Am. Chem. Soc. 2013 135 (35) 12940â€“12943"	COMPLEMENTARY	AuSphericalDoubleMonomerPDT/DMB	Gram+SYS
39	0	0	0.0577603	0	0.5	0	0.267042	Au	MBC (uM)	40.6159	Klebsiella pneumoniae	ATCC13883	Spherical	4	PDT/DMB	Double	Monomer	16	MT	Gram-	RES	0	1	1	0	t	0.447154	-0.009	-0.01	0.0993988	0.0302842	0.0319897	-0.142944	-0.119615	-0.149459	-0.118648	-0.000738822	-0.000738822	196.967	10.2	2.54	6.1	2.5	24	SC1=NC(N)=CC(N)=N1.CN(C(NC(N)=N)=N)C	J. Am. Chem. Soc. 2013 135 (35) 12940â€“12943"	COMPLEMENTARY	AuSphericalDoubleMonomerPDT/DMB	Gram-RES
39	0	0	2.50866e-11	0	0.5	0	0.265129	Au	MBC (uM)	40.6159	Klebsiella pneumoniae	ATCC13883	Spherical	4	PDT/DMB	Double	Monomer	4	CJ	Gram-	GIT	0	1	1	0	t	0.447154	-0.002	0	0.122397	0.0791961	0.0807547	-0.142944	-0.119615	-0.149459	-0.118648	-0.000738822	-0.000738822	196.967	10.2	2.54	6.1	2.5	24	SC1=NC(N)=CC(N)=N1.CN(C(NC(N)=N)=N)C	J. Am. Chem. Soc. 2013 135 (35) 12940â€“12943"	COMPLEMENTARY	AuSphericalDoubleMonomerPDT/DMB	Gram-GIT
39	0	0	0.0154746	0	0.5	0	0.268378	Au	MBC (uM)	40.6159	Klebsiella pneumoniae	ATCC13883	Spherical	4	PDT/DMB	Double	Monomer	10	HI	Gram-	SYS	0	1	1	0	t	0.447154	0.00357143	0.000571429	0.114325	0.0458025	0.0470383	-0.142944	-0.119615	-0.149459	-0.118648	-0.000738822	-0.000738822	196.967	10.2	2.54	6.1	2.5	24	SC1=NC(N)=CC(N)=N1.CN(C(NC(N)=N)=N)C	J. Am. Chem. Soc. 2013 135 (35) 12940â€“12943"	COMPLEMENTARY	AuSphericalDoubleMonomerPDT/DMB	Gram-SYS
39	0	0	1.8803e-11	0	0.5	0	0.265217	Au	MBC (uM)	40.6159	Klebsiella pneumoniae	ATCC13883	Spherical	4	PDT/DMB	Double	Monomer	9	EF	Gram+	GIT	0	1	1	0	t	0.447154	-0.004	-0.001	0.122096	0.0733832	0.0748523	-0.142944	-0.119615	-0.149459	-0.118648	-0.000738822	-0.000738822	196.967	10.2	2.54	6.1	2.5	24	SC1=NC(N)=CC(N)=N1.CN(C(NC(N)=N)=N)C	J. Am. Chem. Soc. 2013 135 (35) 12940â€“12943"	COMPLEMENTARY	AuSphericalDoubleMonomerPDT/DMB	Gram+GIT
39	0	0	9.26546e-10	0	0.5	0	0.266164	Au	MBC (uM)	40.6159	Klebsiella pneumoniae	ATCC13883	Spherical	4	PDT/DMB	Double	Monomer	24	ST	Gram+	RES	0	1	1	0	t	0.447154	0.00133333	0.00233333	0.124568	0.0735856	0.0748657	-0.142944	-0.119615	-0.149459	-0.118648	-0.000738822	-0.000738822	196.967	10.2	2.54	6.1	2.5	24	SC1=NC(N)=CC(N)=N1.CN(C(NC(N)=N)=N)C	J. Am. Chem. Soc. 2013 135 (35) 12940â€“12943"	COMPLEMENTARY	AuSphericalDoubleMonomerPDT/DMB	Gram+RES
39	0	0	8.76249e-15	0	0.5	0	0.263725	Au	MBC (uM)	40.6159	Klebsiella pneumoniae	ATCC13883	Spherical	4	PDT/DMB	Double	Monomer	6	CT	Gram-	SYS	0	1	1	0	t	0.447154	0.00457143	0.00557143	0.129748	0.11685	0.11775	-0.142944	-0.119615	-0.149459	-0.118648	-0.000738822	-0.000738822	196.967	10.2	2.54	6.1	2.5	24	SC1=NC(N)=CC(N)=N1.CN(C(NC(N)=N)=N)C	J. Am. Chem. Soc. 2013 135 (35) 12940â€“12943"	COMPLEMENTARY	AuSphericalDoubleMonomerPDT/DMB	Gram-SYS
40	0	0	0.2261	0	0.5	0	0.270531	Au	MBC (uM)	40.6159	Klebsiella pneumoniae	ATCC13883	Spherical	5	PDT/CPB	Double	Monomer	25	TY	Gram+	SYS	0	1	1	0	t	0.447154	-0.0005	-0.0005	0.10259	0.0124517	0.0135345	-0.142944	-0.119615	-0.149459	-0.109226	-0.000738822	-0.000738822	196.967	10.2	2.54	6.1	2.2	24	SC1=NC(N)=CC(N)=N1.N=C(NC(N)=N)NC1=CC(Cl)=CC=C1	J. Am. Chem. Soc. 2013 135 (35) 12940â€“12943"	COMPLEMENTARY	AuSphericalDoubleMonomerPDT/CPB	Gram+SYS
40	0	0	0.0703399	0	0.5	0	0.26731	Au	MBC (uM)	40.6159	Klebsiella pneumoniae	ATCC13883	Spherical	5	PDT/CPB	Double	Monomer	16	MT	Gram-	RES	0	1	1	0	t	0.447154	-0.009	-0.01	0.0993988	0.0302842	0.0319897	-0.142944	-0.119615	-0.149459	-0.109226	-0.000738822	-0.000738822	196.967	10.2	2.54	6.1	2.2	24	SC1=NC(N)=CC(N)=N1.N=C(NC(N)=N)NC1=CC(Cl)=CC=C1	J. Am. Chem. Soc. 2013 135 (35) 12940â€“12943"	COMPLEMENTARY	AuSphericalDoubleMonomerPDT/CPB	Gram-RES
40	0	0	2.3208e-11	0	0.5	0	0.265479	Au	MBC (uM)	40.6159	Klebsiella pneumoniae	ATCC13883	Spherical	5	PDT/CPB	Double	Monomer	9	EF	Gram+	GIT	0	1	1	0	t	0.447154	-0.004	-0.001	0.122096	0.0733832	0.0748523	-0.142944	-0.119615	-0.149459	-0.109226	-0.000738822	-0.000738822	196.967	10.2	2.54	6.1	2.2	24	SC1=NC(N)=CC(N)=N1.N=C(NC(N)=N)NC1=CC(Cl)=CC=C1	J. Am. Chem. Soc. 2013 135 (35) 12940â€“12943"	COMPLEMENTARY	AuSphericalDoubleMonomerPDT/CPB	Gram+GIT
40	0	0	1.14361e-09	0	0.5	0	0.266427	Au	MBC (uM)	40.6159	Klebsiella pneumoniae	ATCC13883	Spherical	5	PDT/CPB	Double	Monomer	24	ST	Gram+	RES	0	1	1	0	t	0.447154	0.00133333	0.00233333	0.124568	0.0735856	0.0748657	-0.142944	-0.119615	-0.149459	-0.109226	-0.000738822	-0.000738822	196.967	10.2	2.54	6.1	2.2	24	SC1=NC(N)=CC(N)=N1.N=C(NC(N)=N)NC1=CC(Cl)=CC=C1	J. Am. Chem. Soc. 2013 135 (35) 12940â€“12943"	COMPLEMENTARY	AuSphericalDoubleMonomerPDT/CPB	Gram+RES
40	0	0	0.0190308	0	0.5	0	0.268645	Au	MBC (uM)	40.6159	Klebsiella pneumoniae	ATCC13883	Spherical	5	PDT/CPB	Double	Monomer	10	HI	Gram-	SYS	0	1	1	0	t	0.447154	0.00357143	0.000571429	0.114325	0.0458025	0.0470383	-0.142944	-0.119615	-0.149459	-0.109226	-0.000738822	-0.000738822	196.967	10.2	2.54	6.1	2.2	24	SC1=NC(N)=CC(N)=N1.N=C(NC(N)=N)NC1=CC(Cl)=CC=C1	J. Am. Chem. Soc. 2013 135 (35) 12940â€“12943"	COMPLEMENTARY	AuSphericalDoubleMonomerPDT/CPB	Gram-SYS
40	0	0	1.08153e-14	0	0.5	0	0.263982	Au	MBC (uM)	40.6159	Klebsiella pneumoniae	ATCC13883	Spherical	5	PDT/CPB	Double	Monomer	6	CT	Gram-	SYS	0	1	1	0	t	0.447154	0.00457143	0.00557143	0.129748	0.11685	0.11775	-0.142944	-0.119615	-0.149459	-0.109226	-0.000738822	-0.000738822	196.967	10.2	2.54	6.1	2.2	24	SC1=NC(N)=CC(N)=N1.N=C(NC(N)=N)NC1=CC(Cl)=CC=C1	J. Am. Chem. Soc. 2013 135 (35) 12940â€“12943"	COMPLEMENTARY	AuSphericalDoubleMonomerPDT/CPB	Gram-SYS
41	0	0	0.0820624	0	0.5	0	0.267523	Au	MBC (uM)	40.6159	Klebsiella pneumoniae	ATCC13883	Spherical	6	PDT/G	Double	Monomer	16	MT	Gram-	RES	0	1	1	0	t	0.447154	-0.009	-0.01	0.0993988	0.0302842	0.0319897	-0.142944	-0.119615	-0.149459	-0.101758	-0.000738822	-0.000738822	196.967	10.2	2.54	6.1	2	24	SC1=NC(N)=CC(N)=N1.NC(N)=N	J. Am. Chem. Soc. 2013 135 (35) 12940â€“12943"	COMPLEMENTARY	AuSphericalDoubleMonomerPDT/G	Gram-RES
41	0	0	0.256616	0	0.5	0	0.270747	Au	MBC (uM)	40.6159	Klebsiella pneumoniae	ATCC13883	Spherical	6	PDT/G	Double	Monomer	25	TY	Gram+	SYS	0	1	1	0	t	0.447154	-0.0005	-0.0005	0.10259	0.0124517	0.0135345	-0.142944	-0.119615	-0.149459	-0.101758	-0.000738822	-0.000738822	196.967	10.2	2.54	6.1	2	24	SC1=NC(N)=CC(N)=N1.NC(N)=N	J. Am. Chem. Soc. 2013 135 (35) 12940â€“12943"	COMPLEMENTARY	AuSphericalDoubleMonomerPDT/G	Gram+SYS
41	0	0	0.0820624	0	0.5	0	0.267523	Au	MBC (uM)	40.6159	Klebsiella pneumoniae	ATCC13883	Spherical	6	PDT/G	Double	Monomer	16	MT	Gram-	RES	0	1	1	0	t	0.447154	-0.009	-0.01	0.0993988	0.0302842	0.0319897	-0.142944	-0.119615	-0.149459	-0.101758	-0.000738822	-0.000738822	196.967	10.2	2.54	6.1	2	24	SC1=NC(N)=CC(N)=N1.NC(N)=N	J. Am. Chem. Soc. 2013 135 (35) 12940â€“12943"	COMPLEMENTARY	AuSphericalDoubleMonomerPDT/G	Gram-RES
41	0	0	0.0224085	0	0.5	0	0.268858	Au	MBC (uM)	40.6159	Klebsiella pneumoniae	ATCC13883	Spherical	6	PDT/G	Double	Monomer	10	HI	Gram-	SYS	0	1	1	0	t	0.447154	0.00357143	0.000571429	0.114325	0.0458025	0.0470383	-0.142944	-0.119615	-0.149459	-0.101758	-0.000738822	-0.000738822	196.967	10.2	2.54	6.1	2	24	SC1=NC(N)=CC(N)=N1.NC(N)=N	J. Am. Chem. Soc. 2013 135 (35) 12940â€“12943"	COMPLEMENTARY	AuSphericalDoubleMonomerPDT/G	Gram-SYS
41	0	0	1.35123e-09	0	0.5	0	0.266636	Au	MBC (uM)	40.6159	Klebsiella pneumoniae	ATCC13883	Spherical	6	PDT/G	Double	Monomer	24	ST	Gram+	RES	0	1	1	0	t	0.447154	0.00133333	0.00233333	0.124568	0.0735856	0.0748657	-0.142944	-0.119615	-0.149459	-0.101758	-0.000738822	-0.000738822	196.967	10.2	2.54	6.1	2	24	SC1=NC(N)=CC(N)=N1.NC(N)=N	J. Am. Chem. Soc. 2013 135 (35) 12940â€“12943"	COMPLEMENTARY	AuSphericalDoubleMonomerPDT/G	Gram+RES
41	0	0	2.74214e-11	0	0.5	0	0.265688	Au	MBC (uM)	40.6159	Klebsiella pneumoniae	ATCC13883	Spherical	6	PDT/G	Double	Monomer	9	EF	Gram+	GIT	0	1	1	0	t	0.447154	-0.004	-0.001	0.122096	0.0733832	0.0748523	-0.142944	-0.119615	-0.149459	-0.101758	-0.000738822	-0.000738822	196.967	10.2	2.54	6.1	2	24	SC1=NC(N)=CC(N)=N1.NC(N)=N	J. Am. Chem. Soc. 2013 135 (35) 12940â€“12943"	COMPLEMENTARY	AuSphericalDoubleMonomerPDT/G	Gram+GIT
41	0	0	1.27788e-14	0	0.5	0	0.264186	Au	MBC (uM)	40.6159	Klebsiella pneumoniae	ATCC13883	Spherical	6	PDT/G	Double	Monomer	6	CT	Gram-	SYS	0	1	1	0	t	0.447154	0.00457143	0.00557143	0.129748	0.11685	0.11775	-0.142944	-0.119615	-0.149459	-0.101758	-0.000738822	-0.000738822	196.967	10.2	2.54	6.1	2	24	SC1=NC(N)=CC(N)=N1.NC(N)=N	J. Am. Chem. Soc. 2013 135 (35) 12940â€“12943"	COMPLEMENTARY	AuSphericalDoubleMonomerPDT/G	Gram-SYS
41	0	0	3.65852e-11	0	0.5	0	0.265599	Au	MBC (uM)	40.6159	Klebsiella pneumoniae	ATCC13883	Spherical	6	PDT/G	Double	Monomer	4	CJ	Gram-	GIT	0	1	1	0	t	0.447154	-0.002	0	0.122397	0.0791961	0.0807547	-0.142944	-0.119615	-0.149459	-0.101758	-0.000738822	-0.000738822	196.967	10.2	2.54	6.1	2	24	SC1=NC(N)=CC(N)=N1.NC(N)=N	J. Am. Chem. Soc. 2013 135 (35) 12940â€“12943"	COMPLEMENTARY	AuSphericalDoubleMonomerPDT/G	Gram-GIT
42	1	0	0.482791	1	0.731059	0	0.269286	Au	MBC (uM)	81.2319	Escherichia coli	ATCC11775	Spherical	7	PDT	Single	Monomer	8	EC	Gram-	GIT	1	1	1	1	t	0.447154	-0.004	-0.004	0.100485	0.00996768	0.0108964	-0.142944	-0.119615	-0.149459	-0.133639	0.000813959	-0.000847443	196.967	10.2	2.54	6.1	3.2	24	SC1=NC(N)=CC(N)=N1	J. Am. Chem. Soc. 2013 135 (35) 12940â€“12943"	COMPLEMENTARY	AuSphericalSingleMonomerPDT	Gram-GIT
42	1	0	0.482791	1	0.731059	0	0.269286	Au	MBC (uM)	81.2319	Escherichia coli	ATCC11775	Spherical	7	PDT	Single	Monomer	8	EC	Gram-	GIT	1	1	1	1	t	0.447154	-0.004	-0.004	0.100485	0.00996768	0.0108964	-0.142944	-0.119615	-0.149459	-0.133639	0.000813959	-0.000847443	196.967	10.2	2.54	6.1	3.2	24	SC1=NC(N)=CC(N)=N1	J. Am. Chem. Soc. 2013 135 (35) 12940â€“12943"	COMPLEMENTARY	AuSphericalSingleMonomerPDT	Gram-GIT
42	0	0	6.5636e-10	0	0.5	0	0.265747	Au	MBC (uM)	81.2319	Escherichia coli	ATCC11775	Spherical	7	PDT	Single	Monomer	24	ST	Gram+	RES	0	1	1	0	t	0.447154	0.00133333	0.00233333	0.124568	0.0735856	0.0748657	-0.142944	-0.119615	-0.149459	-0.133639	0.000813959	-0.000847443	196.967	10.2	2.54	6.1	3.2	24	SC1=NC(N)=CC(N)=N1	J. Am. Chem. Soc. 2013 135 (35) 12940â€“12943"	COMPLEMENTARY	AuSphericalSingleMonomerPDT	Gram+RES
42	0	0	5.15291e-12	0	0.5	0	0.265591	Au	MBC (uM)	81.2319	Escherichia coli	ATCC11775	Spherical	7	PDT	Single	Monomer	21	PN	Gram+	RES	0	1	1	0	t	0.447154	-0.000666667	0.00233333	0.123904	0.0718737	0.0736966	-0.142944	-0.119615	-0.149459	-0.133639	0.000813959	-0.000847443	196.967	10.2	2.54	6.1	3.2	24	SC1=NC(N)=CC(N)=N1	J. Am. Chem. Soc. 2013 135 (35) 12940â€“12943"	COMPLEMENTARY	AuSphericalSingleMonomerPDT	Gram+RES
42	0	0	6.5636e-10	0	0.5	0	0.265747	Au	MBC (uM)	81.2319	Escherichia coli	ATCC11775	Spherical	7	PDT	Single	Monomer	24	ST	Gram+	RES	0	1	1	0	t	0.447154	0.00133333	0.00233333	0.124568	0.0735856	0.0748657	-0.142944	-0.119615	-0.149459	-0.133639	0.000813959	-0.000847443	196.967	10.2	2.54	6.1	3.2	24	SC1=NC(N)=CC(N)=N1	J. Am. Chem. Soc. 2013 135 (35) 12940â€“12943"	COMPLEMENTARY	AuSphericalSingleMonomerPDT	Gram+RES
42	1	0	0.482791	1	0.731059	0	0.269286	Au	MBC (uM)	81.2319	Escherichia coli	ATCC11775	Spherical	7	PDT	Single	Monomer	8	EC	Gram-	GIT	1	1	1	1	t	0.447154	-0.004	-0.004	0.100485	0.00996768	0.0108964	-0.142944	-0.119615	-0.149459	-0.133639	0.000813959	-0.000847443	196.967	10.2	2.54	6.1	3.2	24	SC1=NC(N)=CC(N)=N1	J. Am. Chem. Soc. 2013 135 (35) 12940â€“12943"	COMPLEMENTARY	AuSphericalSingleMonomerPDT	Gram-GIT
42	0	0	0.143601	0	0.5	0	0.269829	Au	MBC (uM)	81.2319	Escherichia coli	ATCC11775	Spherical	7	PDT	Single	Monomer	25	TY	Gram+	SYS	0	1	1	0	t	0.447154	-0.0005	-0.0005	0.10259	0.0124517	0.0135345	-0.142944	-0.119615	-0.149459	-0.133639	0.000813959	-0.000847443	196.967	10.2	2.54	6.1	3.2	24	SC1=NC(N)=CC(N)=N1	J. Am. Chem. Soc. 2013 135 (35) 12940â€“12943"	COMPLEMENTARY	AuSphericalSingleMonomerPDT	Gram+SYS
42	0	0	1.77712e-11	0	0.5	0	0.264714	Au	MBC (uM)	81.2319	Escherichia coli	ATCC11775	Spherical	7	PDT	Single	Monomer	4	CJ	Gram-	GIT	0	1	1	0	t	0.447154	-0.002	0	0.122397	0.0791961	0.0807547	-0.142944	-0.119615	-0.149459	-0.133639	0.000813959	-0.000847443	196.967	10.2	2.54	6.1	3.2	24	SC1=NC(N)=CC(N)=N1	J. Am. Chem. Soc. 2013 135 (35) 12940â€“12943"	COMPLEMENTARY	AuSphericalSingleMonomerPDT	Gram-GIT
42	0	0	0.0416181	0	0.5	0	0.266617	Au	MBC (uM)	81.2319	Escherichia coli	ATCC11775	Spherical	7	PDT	Single	Monomer	16	MT	Gram-	RES	0	1	1	0	t	0.447154	-0.009	-0.01	0.0993988	0.0302842	0.0319897	-0.142944	-0.119615	-0.149459	-0.133639	0.000813959	-0.000847443	196.967	10.2	2.54	6.1	3.2	24	SC1=NC(N)=CC(N)=N1	J. Am. Chem. Soc. 2013 135 (35) 12940â€“12943"	COMPLEMENTARY	AuSphericalSingleMonomerPDT	Gram-RES
42	1	0	0.482791	1	0.731059	0	0.269286	Au	MBC (uM)	81.2319	Escherichia coli	ATCC11775	Spherical	7	PDT	Single	Monomer	8	EC	Gram-	GIT	1	1	1	1	t	0.447154	-0.004	-0.004	0.100485	0.00996768	0.0108964	-0.142944	-0.119615	-0.149459	-0.133639	0.000813959	-0.000847443	196.967	10.2	2.54	6.1	3.2	24	SC1=NC(N)=CC(N)=N1	J. Am. Chem. Soc. 2013 135 (35) 12940â€“12943"	COMPLEMENTARY	AuSphericalSingleMonomerPDT	Gram-GIT
42	0	0	0.0110118	0	0.5	0	0.267954	Au	MBC (uM)	81.2319	Escherichia coli	ATCC11775	Spherical	7	PDT	Single	Monomer	10	HI	Gram-	SYS	0	1	1	0	t	0.447154	0.00357143	0.000571429	0.114325	0.0458025	0.0470383	-0.142944	-0.119615	-0.149459	-0.133639	0.000813959	-0.000847443	196.967	10.2	2.54	6.1	3.2	24	SC1=NC(N)=CC(N)=N1	J. Am. Chem. Soc. 2013 135 (35) 12940â€“12943"	COMPLEMENTARY	AuSphericalSingleMonomerPDT	Gram-SYS
42	0	0	1.332e-11	0	0.5	0	0.264801	Au	MBC (uM)	81.2319	Escherichia coli	ATCC11775	Spherical	7	PDT	Single	Monomer	9	EF	Gram+	GIT	0	1	1	0	t	0.447154	-0.004	-0.001	0.122096	0.0733832	0.0748523	-0.142944	-0.119615	-0.149459	-0.133639	0.000813959	-0.000847443	196.967	10.2	2.54	6.1	3.2	24	SC1=NC(N)=CC(N)=N1	J. Am. Chem. Soc. 2013 135 (35) 12940â€“12943"	COMPLEMENTARY	AuSphericalSingleMonomerPDT	Gram+GIT
42	0	0	2.85589e-12	0	0.5	0	0.264509	Au	MBC (uM)	81.2319	Escherichia coli	ATCC11775	Spherical	7	PDT	Single	Monomer	20	PG	Gram-	SYS	0	1	1	0	t	0.447154	-0.00442857	-0.00142857	0.11973	0.0759019	0.0779623	-0.142944	-0.119615	-0.149459	-0.133639	0.000813959	-0.000847443	196.967	10.2	2.54	6.1	3.2	24	SC1=NC(N)=CC(N)=N1	J. Am. Chem. Soc. 2013 135 (35) 12940â€“12943"	COMPLEMENTARY	AuSphericalSingleMonomerPDT	Gram-SYS
42	0	0	6.20731e-15	0	0.5	0	0.263319	Au	MBC (uM)	81.2319	Escherichia coli	ATCC11775	Spherical	7	PDT	Single	Monomer	6	CT	Gram-	SYS	0	1	1	0	t	0.447154	0.00457143	0.00557143	0.129748	0.11685	0.11775	-0.142944	-0.119615	-0.149459	-0.133639	0.000813959	-0.000847443	196.967	10.2	2.54	6.1	3.2	24	SC1=NC(N)=CC(N)=N1	J. Am. Chem. Soc. 2013 135 (35) 12940â€“12943"	COMPLEMENTARY	AuSphericalSingleMonomerPDT	Gram-SYS
43	1	1	0.802592	1	0.731059	0	0.271602	Au	MBC (uM)	81.2319	Pseudomonas aeruginosa	ATCC27853	Spherical	1	PDT/Mel	Double	Monomer	19	PA	Gram-	SYS	1	1	1	1	t	0.447154	0.00657143	0.00357143	0.102611	0.0205758	0.0222078	-0.143756	-0.119614	-0.149464	-0.0932842	-0.000459444	-0.000459444	196.967	10.2	2.54	6.1	1.8	24	SC1=NC(N)=CC(N)=N1.c1(nc(nc(n1)N)N)N	J. Am. Chem. Soc. 2013 135 (35) 12940â€“12943"	COMPLEMENTARY	AuSphericalDoubleMonomerPDT/Mel	Gram-SYS
43	1	1	0.802592	1	0.731059	0	0.271602	Au	MBC (uM)	81.2319	Pseudomonas aeruginosa	ATCC27853	Spherical	1	PDT/Mel	Double	Monomer	19	PA	Gram-	SYS	1	1	1	1	t	0.447154	0.00657143	0.00357143	0.102611	0.0205758	0.0222078	-0.143756	-0.119614	-0.149464	-0.0932842	-0.000459444	-0.000459444	196.967	10.2	2.54	6.1	1.8	24	SC1=NC(N)=CC(N)=N1.c1(nc(nc(n1)N)N)N	J. Am. Chem. Soc. 2013 135 (35) 12940â€“12943"	COMPLEMENTARY	AuSphericalDoubleMonomerPDT/Mel	Gram-SYS
43	0	0	2.34788e-11	0	0.5	0	0.265911	Au	MBC (uM)	81.2319	Pseudomonas aeruginosa	ATCC27853	Spherical	1	PDT/Mel	Double	Monomer	9	EF	Gram+	GIT	0	1	1	0	t	0.447154	-0.004	-0.001	0.122096	0.0733832	0.0748523	-0.143756	-0.119614	-0.149464	-0.0932842	-0.000459444	-0.000459444	196.967	10.2	2.54	6.1	1.8	24	SC1=NC(N)=CC(N)=N1.c1(nc(nc(n1)N)N)N	J. Am. Chem. Soc. 2013 135 (35) 12940â€“12943"	COMPLEMENTARY	AuSphericalDoubleMonomerPDT/Mel	Gram+GIT
43	0	0	0.228137	0	0.5	0	0.270977	Au	MBC (uM)	81.2319	Pseudomonas aeruginosa	ATCC27853	Spherical	1	PDT/Mel	Double	Monomer	25	TY	Gram+	SYS	0	1	1	0	t	0.447154	-0.0005	-0.0005	0.10259	0.0124517	0.0135345	-0.143756	-0.119614	-0.149464	-0.0932842	-0.000459444	-0.000459444	196.967	10.2	2.54	6.1	1.8	24	SC1=NC(N)=CC(N)=N1.c1(nc(nc(n1)N)N)N	J. Am. Chem. Soc. 2013 135 (35) 12940â€“12943"	COMPLEMENTARY	AuSphericalDoubleMonomerPDT/Mel	Gram+SYS
43	0	0	3.1325e-11	0	0.5	0	0.265821	Au	MBC (uM)	81.2319	Pseudomonas aeruginosa	ATCC27853	Spherical	1	PDT/Mel	Double	Monomer	4	CJ	Gram-	GIT	0	1	1	0	t	0.447154	-0.002	0	0.122397	0.0791961	0.0807547	-0.143756	-0.119614	-0.149464	-0.0932842	-0.000459444	-0.000459444	196.967	10.2	2.54	6.1	1.8	24	SC1=NC(N)=CC(N)=N1.c1(nc(nc(n1)N)N)N	J. Am. Chem. Soc. 2013 135 (35) 12940â€“12943"	COMPLEMENTARY	AuSphericalDoubleMonomerPDT/Mel	Gram-GIT
43	1	1	0.802592	1	0.731059	0	0.271602	Au	MBC (uM)	81.2319	Pseudomonas aeruginosa	ATCC27853	Spherical	1	PDT/Mel	Double	Monomer	19	PA	Gram-	SYS	1	1	1	1	t	0.447154	0.00657143	0.00357143	0.102611	0.0205758	0.0222078	-0.143756	-0.119614	-0.149464	-0.0932842	-0.000459444	-0.000459444	196.967	10.2	2.54	6.1	1.8	24	SC1=NC(N)=CC(N)=N1.c1(nc(nc(n1)N)N)N	J. Am. Chem. Soc. 2013 135 (35) 12940â€“12943"	COMPLEMENTARY	AuSphericalDoubleMonomerPDT/Mel	Gram-SYS
43	0	0	0.0711025	0	0.5	0	0.26775	Au	MBC (uM)	81.2319	Pseudomonas aeruginosa	ATCC27853	Spherical	1	PDT/Mel	Double	Monomer	16	MT	Gram-	RES	0	1	1	0	t	0.447154	-0.009	-0.01	0.0993988	0.0302842	0.0319897	-0.143756	-0.119614	-0.149464	-0.0932842	-0.000459444	-0.000459444	196.967	10.2	2.54	6.1	1.8	24	SC1=NC(N)=CC(N)=N1.c1(nc(nc(n1)N)N)N	J. Am. Chem. Soc. 2013 135 (35) 12940â€“12943"	COMPLEMENTARY	AuSphericalDoubleMonomerPDT/Mel	Gram-RES
43	1	1	0.802592	1	0.731059	0	0.271602	Au	MBC (uM)	81.2319	Pseudomonas aeruginosa	ATCC27853	Spherical	1	PDT/Mel	Double	Monomer	19	PA	Gram-	SYS	1	1	1	1	t	0.447154	0.00657143	0.00357143	0.102611	0.0205758	0.0222078	-0.143756	-0.119614	-0.149464	-0.0932842	-0.000459444	-0.000459444	196.967	10.2	2.54	6.1	1.8	24	SC1=NC(N)=CC(N)=N1.c1(nc(nc(n1)N)N)N	J. Am. Chem. Soc. 2013 135 (35) 12940â€“12943"	COMPLEMENTARY	AuSphericalDoubleMonomerPDT/Mel	Gram-SYS
43	0	0	1.15695e-09	0	0.5	0	0.26686	Au	MBC (uM)	81.2319	Pseudomonas aeruginosa	ATCC27853	Spherical	1	PDT/Mel	Double	Monomer	24	ST	Gram+	RES	0	1	1	0	t	0.447154	0.00133333	0.00233333	0.124568	0.0735856	0.0748657	-0.143756	-0.119614	-0.149464	-0.0932842	-0.000459444	-0.000459444	196.967	10.2	2.54	6.1	1.8	24	SC1=NC(N)=CC(N)=N1.c1(nc(nc(n1)N)N)N	J. Am. Chem. Soc. 2013 135 (35) 12940â€“12943"	COMPLEMENTARY	AuSphericalDoubleMonomerPDT/Mel	Gram+RES
43	0	0	0.0192487	0	0.5	0	0.269085	Au	MBC (uM)	81.2319	Pseudomonas aeruginosa	ATCC27853	Spherical	1	PDT/Mel	Double	Monomer	10	HI	Gram-	SYS	0	1	1	0	t	0.447154	0.00357143	0.000571429	0.114325	0.0458025	0.0470383	-0.143756	-0.119614	-0.149464	-0.0932842	-0.000459444	-0.000459444	196.967	10.2	2.54	6.1	1.8	24	SC1=NC(N)=CC(N)=N1.c1(nc(nc(n1)N)N)N	J. Am. Chem. Soc. 2013 135 (35) 12940â€“12943"	COMPLEMENTARY	AuSphericalDoubleMonomerPDT/Mel	Gram-SYS
43	0	0	1.09415e-14	0	0.5	0	0.264404	Au	MBC (uM)	81.2319	Pseudomonas aeruginosa	ATCC27853	Spherical	1	PDT/Mel	Double	Monomer	6	CT	Gram-	SYS	0	1	1	0	t	0.447154	0.00457143	0.00557143	0.129748	0.11685	0.11775	-0.143756	-0.119614	-0.149464	-0.0932842	-0.000459444	-0.000459444	196.967	10.2	2.54	6.1	1.8	24	SC1=NC(N)=CC(N)=N1.c1(nc(nc(n1)N)N)N	J. Am. Chem. Soc. 2013 135 (35) 12940â€“12943"	COMPLEMENTARY	AuSphericalDoubleMonomerPDT/Mel	Gram-SYS
43	0	0	1.70202e-05	0	0.5	0	0.268492	Au	MBC (uM)	81.2319	Pseudomonas aeruginosa	ATCC27853	Spherical	1	PDT/Mel	Double	Monomer	23	SC	Gram-	NO	0	0	1	0	t	0.447154	-0.0035	-0.0025	0.111339	0.0377349	0.0396256	-0.143756	-0.119614	-0.149464	-0.0932842	-0.000459444	-0.000459444	196.967	10.2	2.54	6.1	1.8	24	SC1=NC(N)=CC(N)=N1.c1(nc(nc(n1)N)N)N	J. Am. Chem. Soc. 2013 135 (35) 12940â€“12943"	COMPLEMENTARY	AuSphericalDoubleMonomerPDT/Mel	Gram-NO
43	0	0	8.01901e-09	0	0.5	0	0.267308	Au	MBC (uM)	81.2319	Pseudomonas aeruginosa	ATCC27853	Spherical	1	PDT/Mel	Double	Monomer	3	CA	Gram+	NO	0	0	1	0	t	0.447154	-0.00333333	-0.00133333	0.118146	0.0549352	0.0572128	-0.143756	-0.119614	-0.149464	-0.0932842	-0.000459444	-0.000459444	196.967	10.2	2.54	6.1	1.8	24	SC1=NC(N)=CC(N)=N1.c1(nc(nc(n1)N)N)N	J. Am. Chem. Soc. 2013 135 (35) 12940â€“12943"	COMPLEMENTARY	AuSphericalDoubleMonomerPDT/Mel	Gram+NO
44	1	1	0.851546	1	0.731059	0	0.271616	Au	MBC (uM)	81.2319	Pseudomonas aeruginosa	MDR	Spherical	1	PDT/Mel	Double	Monomer	19	PA	Gram-	SYS	1	1	1	1	t	0.447154	0.00657143	0.00357143	0.102611	0.0205758	0.0222078	-0.142944	-0.119615	-0.149459	-0.0932976	-0.000738822	-0.000738822	196.967	10.2	2.54	6.1	1.8	24	SC1=NC(N)=CC(N)=N1.c1(nc(nc(n1)N)N)N	J. Am. Chem. Soc. 2013 135 (35) 12940â€“12943"	COMPLEMENTARY	AuSphericalDoubleMonomerPDT/Mel	Gram-SYS
44	1	1	0.851546	1	0.731059	0	0.271616	Au	MBC (uM)	81.2319	Pseudomonas aeruginosa	MDR	Spherical	1	PDT/Mel	Double	Monomer	19	PA	Gram-	SYS	1	1	1	1	t	0.447154	0.00657143	0.00357143	0.102611	0.0205758	0.0222078	-0.142944	-0.119615	-0.149459	-0.0932976	-0.000738822	-0.000738822	196.967	10.2	2.54	6.1	1.8	24	SC1=NC(N)=CC(N)=N1.c1(nc(nc(n1)N)N)N	J. Am. Chem. Soc. 2013 135 (35) 12940â€“12943"	COMPLEMENTARY	AuSphericalDoubleMonomerPDT/Mel	Gram-SYS
44	0	0	0.0974688	0	0.5	0	0.267764	Au	MBC (uM)	81.2319	Pseudomonas aeruginosa	MDR	Spherical	1	PDT/Mel	Double	Monomer	16	MT	Gram-	RES	0	1	1	0	t	0.447154	-0.009	-0.01	0.0993988	0.0302842	0.0319897	-0.142944	-0.119615	-0.149459	-0.0932976	-0.000738822	-0.000738822	196.967	10.2	2.54	6.1	1.8	24	SC1=NC(N)=CC(N)=N1.c1(nc(nc(n1)N)N)N	J. Am. Chem. Soc. 2013 135 (35) 12940â€“12943"	COMPLEMENTARY	AuSphericalDoubleMonomerPDT/Mel	Gram-RES
44	1	1	0.851546	1	0.731059	0	0.271616	Au	MBC (uM)	81.2319	Pseudomonas aeruginosa	MDR	Spherical	1	PDT/Mel	Double	Monomer	19	PA	Gram-	SYS	1	1	1	1	t	0.447154	0.00657143	0.00357143	0.102611	0.0205758	0.0222078	-0.142944	-0.119615	-0.149459	-0.0932976	-0.000738822	-0.000738822	196.967	10.2	2.54	6.1	1.8	24	SC1=NC(N)=CC(N)=N1.c1(nc(nc(n1)N)N)N	J. Am. Chem. Soc. 2013 135 (35) 12940â€“12943"	COMPLEMENTARY	AuSphericalDoubleMonomerPDT/Mel	Gram-SYS
44	1	1	0.851546	1	0.731059	0	0.271616	Au	MBC (uM)	81.2319	Pseudomonas aeruginosa	MDR	Spherical	1	PDT/Mel	Double	Monomer	19	PA	Gram-	SYS	1	1	1	1	t	0.447154	0.00657143	0.00357143	0.102611	0.0205758	0.0222078	-0.142944	-0.119615	-0.149459	-0.0932976	-0.000738822	-0.000738822	196.967	10.2	2.54	6.1	1.8	24	SC1=NC(N)=CC(N)=N1.c1(nc(nc(n1)N)N)N	J. Am. Chem. Soc. 2013 135 (35) 12940â€“12943"	COMPLEMENTARY	AuSphericalDoubleMonomerPDT/Mel	Gram-SYS
44	0	0	0.294287	0	0.5	0	0.270991	Au	MBC (uM)	81.2319	Pseudomonas aeruginosa	MDR	Spherical	1	PDT/Mel	Double	Monomer	25	TY	Gram+	SYS	0	1	1	0	t	0.447154	-0.0005	-0.0005	0.10259	0.0124517	0.0135345	-0.142944	-0.119615	-0.149459	-0.0932976	-0.000738822	-0.000738822	196.967	10.2	2.54	6.1	1.8	24	SC1=NC(N)=CC(N)=N1.c1(nc(nc(n1)N)N)N	J. Am. Chem. Soc. 2013 135 (35) 12940â€“12943"	COMPLEMENTARY	AuSphericalDoubleMonomerPDT/Mel	Gram+SYS
44	0	0	1.63231e-09	0	0.5	0	0.266874	Au	MBC (uM)	81.2319	Pseudomonas aeruginosa	MDR	Spherical	1	PDT/Mel	Double	Monomer	24	ST	Gram+	RES	0	1	1	0	t	0.447154	0.00133333	0.00233333	0.124568	0.0735856	0.0748657	-0.142944	-0.119615	-0.149459	-0.0932976	-0.000738822	-0.000738822	196.967	10.2	2.54	6.1	1.8	24	SC1=NC(N)=CC(N)=N1.c1(nc(nc(n1)N)N)N	J. Am. Chem. Soc. 2013 135 (35) 12940â€“12943"	COMPLEMENTARY	AuSphericalDoubleMonomerPDT/Mel	Gram+RES
44	0	0	2.4013e-05	0	0.5	0	0.268505	Au	MBC (uM)	81.2319	Pseudomonas aeruginosa	MDR	Spherical	1	PDT/Mel	Double	Monomer	23	SC	Gram-	NO	0	0	1	0	t	0.447154	-0.0035	-0.0025	0.111339	0.0377349	0.0396256	-0.142944	-0.119615	-0.149459	-0.0932976	-0.000738822	-0.000738822	196.967	10.2	2.54	6.1	1.8	24	SC1=NC(N)=CC(N)=N1.c1(nc(nc(n1)N)N)N	J. Am. Chem. Soc. 2013 135 (35) 12940â€“12943"	COMPLEMENTARY	AuSphericalDoubleMonomerPDT/Mel	Gram-NO
44	0	0	1.5437e-14	0	0.5	0	0.264417	Au	MBC (uM)	81.2319	Pseudomonas aeruginosa	MDR	Spherical	1	PDT/Mel	Double	Monomer	6	CT	Gram-	SYS	0	1	1	0	t	0.447154	0.00457143	0.00557143	0.129748	0.11685	0.11775	-0.142944	-0.119615	-0.149459	-0.0932976	-0.000738822	-0.000738822	196.967	10.2	2.54	6.1	1.8	24	SC1=NC(N)=CC(N)=N1.c1(nc(nc(n1)N)N)N	J. Am. Chem. Soc. 2013 135 (35) 12940â€“12943"	COMPLEMENTARY	AuSphericalDoubleMonomerPDT/Mel	Gram-SYS
44	0	0	0.0269442	0	0.5	0	0.269099	Au	MBC (uM)	81.2319	Pseudomonas aeruginosa	MDR	Spherical	1	PDT/Mel	Double	Monomer	10	HI	Gram-	SYS	0	1	1	0	t	0.447154	0.00357143	0.000571429	0.114325	0.0458025	0.0470383	-0.142944	-0.119615	-0.149459	-0.0932976	-0.000738822	-0.000738822	196.967	10.2	2.54	6.1	1.8	24	SC1=NC(N)=CC(N)=N1.c1(nc(nc(n1)N)N)N	J. Am. Chem. Soc. 2013 135 (35) 12940â€“12943"	COMPLEMENTARY	AuSphericalDoubleMonomerPDT/Mel	Gram-SYS
44	0	0	4.41955e-11	0	0.5	0	0.265835	Au	MBC (uM)	81.2319	Pseudomonas aeruginosa	MDR	Spherical	1	PDT/Mel	Double	Monomer	4	CJ	Gram-	GIT	0	1	1	0	t	0.447154	-0.002	0	0.122397	0.0791961	0.0807547	-0.142944	-0.119615	-0.149459	-0.0932976	-0.000738822	-0.000738822	196.967	10.2	2.54	6.1	1.8	24	SC1=NC(N)=CC(N)=N1.c1(nc(nc(n1)N)N)N	J. Am. Chem. Soc. 2013 135 (35) 12940â€“12943"	COMPLEMENTARY	AuSphericalDoubleMonomerPDT/Mel	Gram-GIT
45	0	0	0.0190308	0	0.5	0	0.268645	Au	MBC (uM)	81.2319	Pseudomonas aeruginosa	MDR	Spherical	2	PDT/ACh	Double	Monomer	10	HI	Gram-	SYS	0	1	1	0	t	0.447154	0.00357143	0.000571429	0.114325	0.0458025	0.0470383	-0.142944	-0.119615	-0.149459	-0.109226	-0.000738822	-0.000738822	196.967	10.2	2.54	6.1	2.2	24	SC1=NC(N)=CC(N)=N1.CC(=O)OCC[N+](C)(C)C	J. Am. Chem. Soc. 2013 135 (35) 12940â€“12943"	COMPLEMENTARY	AuSphericalDoubleMonomerPDT/ACh	Gram-SYS
45	1	1	0.800748	1	0.731059	0	0.271156	Au	MBC (uM)	81.2319	Pseudomonas aeruginosa	MDR	Spherical	2	PDT/ACh	Double	Monomer	19	PA	Gram-	SYS	1	1	1	1	t	0.447154	0.00657143	0.00357143	0.102611	0.0205758	0.0222078	-0.142944	-0.119615	-0.149459	-0.109226	-0.000738822	-0.000738822	196.967	10.2	2.54	6.1	2.2	24	SC1=NC(N)=CC(N)=N1.CC(=O)OCC[N+](C)(C)C	J. Am. Chem. Soc. 2013 135 (35) 12940â€“12943"	COMPLEMENTARY	AuSphericalDoubleMonomerPDT/ACh	Gram-SYS
45	1	1	0.800748	1	0.731059	0	0.271156	Au	MBC (uM)	81.2319	Pseudomonas aeruginosa	MDR	Spherical	2	PDT/ACh	Double	Monomer	19	PA	Gram-	SYS	1	1	1	1	t	0.447154	0.00657143	0.00357143	0.102611	0.0205758	0.0222078	-0.142944	-0.119615	-0.149459	-0.109226	-0.000738822	-0.000738822	196.967	10.2	2.54	6.1	2.2	24	SC1=NC(N)=CC(N)=N1.CC(=O)OCC[N+](C)(C)C	J. Am. Chem. Soc. 2013 135 (35) 12940â€“12943"	COMPLEMENTARY	AuSphericalDoubleMonomerPDT/ACh	Gram-SYS
45	0	0	0.0703399	0	0.5	0	0.26731	Au	MBC (uM)	81.2319	Pseudomonas aeruginosa	MDR	Spherical	2	PDT/ACh	Double	Monomer	16	MT	Gram-	RES	0	1	1	0	t	0.447154	-0.009	-0.01	0.0993988	0.0302842	0.0319897	-0.142944	-0.119615	-0.149459	-0.109226	-0.000738822	-0.000738822	196.967	10.2	2.54	6.1	2.2	24	SC1=NC(N)=CC(N)=N1.CC(=O)OCC[N+](C)(C)C	J. Am. Chem. Soc. 2013 135 (35) 12940â€“12943"	COMPLEMENTARY	AuSphericalDoubleMonomerPDT/ACh	Gram-RES
45	1	1	0.800748	1	0.731059	0	0.271156	Au	MBC (uM)	81.2319	Pseudomonas aeruginosa	MDR	Spherical	2	PDT/ACh	Double	Monomer	19	PA	Gram-	SYS	1	1	1	1	t	0.447154	0.00657143	0.00357143	0.102611	0.0205758	0.0222078	-0.142944	-0.119615	-0.149459	-0.109226	-0.000738822	-0.000738822	196.967	10.2	2.54	6.1	2.2	24	SC1=NC(N)=CC(N)=N1.CC(=O)OCC[N+](C)(C)C	J. Am. Chem. Soc. 2013 135 (35) 12940â€“12943"	COMPLEMENTARY	AuSphericalDoubleMonomerPDT/ACh	Gram-SYS
45	0	0	0.2261	0	0.5	0	0.270531	Au	MBC (uM)	81.2319	Pseudomonas aeruginosa	MDR	Spherical	2	PDT/ACh	Double	Monomer	25	TY	Gram+	SYS	0	1	1	0	t	0.447154	-0.0005	-0.0005	0.10259	0.0124517	0.0135345	-0.142944	-0.119615	-0.149459	-0.109226	-0.000738822	-0.000738822	196.967	10.2	2.54	6.1	2.2	24	SC1=NC(N)=CC(N)=N1.CC(=O)OCC[N+](C)(C)C	J. Am. Chem. Soc. 2013 135 (35) 12940â€“12943"	COMPLEMENTARY	AuSphericalDoubleMonomerPDT/ACh	Gram+SYS
45	0	0	1.08153e-14	0	0.5	0	0.263982	Au	MBC (uM)	81.2319	Pseudomonas aeruginosa	MDR	Spherical	2	PDT/ACh	Double	Monomer	6	CT	Gram-	SYS	0	1	1	0	t	0.447154	0.00457143	0.00557143	0.129748	0.11685	0.11775	-0.142944	-0.119615	-0.149459	-0.109226	-0.000738822	-0.000738822	196.967	10.2	2.54	6.1	2.2	24	SC1=NC(N)=CC(N)=N1.CC(=O)OCC[N+](C)(C)C	J. Am. Chem. Soc. 2013 135 (35) 12940â€“12943"	COMPLEMENTARY	AuSphericalDoubleMonomerPDT/ACh	Gram-SYS
45	1	1	0.800748	1	0.731059	0	0.271156	Au	MBC (uM)	81.2319	Pseudomonas aeruginosa	MDR	Spherical	2	PDT/ACh	Double	Monomer	19	PA	Gram-	SYS	1	1	1	1	t	0.447154	0.00657143	0.00357143	0.102611	0.0205758	0.0222078	-0.142944	-0.119615	-0.149459	-0.109226	-0.000738822	-0.000738822	196.967	10.2	2.54	6.1	2.2	24	SC1=NC(N)=CC(N)=N1.CC(=O)OCC[N+](C)(C)C	J. Am. Chem. Soc. 2013 135 (35) 12940â€“12943"	COMPLEMENTARY	AuSphericalDoubleMonomerPDT/ACh	Gram-SYS
45	0	0	1.14361e-09	0	0.5	0	0.266427	Au	MBC (uM)	81.2319	Pseudomonas aeruginosa	MDR	Spherical	2	PDT/ACh	Double	Monomer	24	ST	Gram+	RES	0	1	1	0	t	0.447154	0.00133333	0.00233333	0.124568	0.0735856	0.0748657	-0.142944	-0.119615	-0.149459	-0.109226	-0.000738822	-0.000738822	196.967	10.2	2.54	6.1	2.2	24	SC1=NC(N)=CC(N)=N1.CC(=O)OCC[N+](C)(C)C	J. Am. Chem. Soc. 2013 135 (35) 12940â€“12943"	COMPLEMENTARY	AuSphericalDoubleMonomerPDT/ACh	Gram+RES
45	0	0	1.68238e-05	0	0.5	0	0.268052	Au	MBC (uM)	81.2319	Pseudomonas aeruginosa	MDR	Spherical	2	PDT/ACh	Double	Monomer	23	SC	Gram-	NO	0	0	1	0	t	0.447154	-0.0035	-0.0025	0.111339	0.0377349	0.0396256	-0.142944	-0.119615	-0.149459	-0.109226	-0.000738822	-0.000738822	196.967	10.2	2.54	6.1	2.2	24	SC1=NC(N)=CC(N)=N1.CC(=O)OCC[N+](C)(C)C	J. Am. Chem. Soc. 2013 135 (35) 12940â€“12943"	COMPLEMENTARY	AuSphericalDoubleMonomerPDT/ACh	Gram-NO
45	0	0	3.09636e-11	0	0.5	0	0.265391	Au	MBC (uM)	81.2319	Pseudomonas aeruginosa	MDR	Spherical	2	PDT/ACh	Double	Monomer	4	CJ	Gram-	GIT	0	1	1	0	t	0.447154	-0.002	0	0.122397	0.0791961	0.0807547	-0.142944	-0.119615	-0.149459	-0.109226	-0.000738822	-0.000738822	196.967	10.2	2.54	6.1	2.2	24	SC1=NC(N)=CC(N)=N1.CC(=O)OCC[N+](C)(C)C	J. Am. Chem. Soc. 2013 135 (35) 12940â€“12943"	COMPLEMENTARY	AuSphericalDoubleMonomerPDT/ACh	Gram-GIT
46	1	1	0.755366	1	0.731059	0	0.271247	Au	MBC (uM)	81.2319	Pseudomonas aeruginosa	ATCC27853	Spherical	3	PDT/CQ	Double	Monomer	19	PA	Gram-	SYS	1	1	1	1	t	0.447154	0.00657143	0.00357143	0.102611	0.0205758	0.0222078	-0.143756	-0.119614	-0.149464	-0.105601	-0.000459444	-0.000459444	196.967	10.2	2.54	6.1	2.1	24	SC1=NC(N)=CC(N)=N1.Clc1cc2nccc(c2cc1)NC(C)CCCN(CC)CC	J. Am. Chem. Soc. 2013 135 (35) 12940â€“12943"	COMPLEMENTARY	AuSphericalDoubleMonomerPDT/CQ	Gram-SYS
46	1	1	0.755366	1	0.731059	0	0.271247	Au	MBC (uM)	81.2319	Pseudomonas aeruginosa	ATCC27853	Spherical	3	PDT/CQ	Double	Monomer	19	PA	Gram-	SYS	1	1	1	1	t	0.447154	0.00657143	0.00357143	0.102611	0.0205758	0.0222078	-0.143756	-0.119614	-0.149464	-0.105601	-0.000459444	-0.000459444	196.967	10.2	2.54	6.1	2.1	24	SC1=NC(N)=CC(N)=N1.Clc1cc2nccc(c2cc1)NC(C)CCCN(CC)CC	J. Am. Chem. Soc. 2013 135 (35) 12940â€“12943"	COMPLEMENTARY	AuSphericalDoubleMonomerPDT/CQ	Gram-SYS
46	0	0	0.0549397	0	0.5	0	0.267399	Au	MBC (uM)	81.2319	Pseudomonas aeruginosa	ATCC27853	Spherical	3	PDT/CQ	Double	Monomer	16	MT	Gram-	RES	0	1	1	0	t	0.447154	-0.009	-0.01	0.0993988	0.0302842	0.0319897	-0.143756	-0.119614	-0.149464	-0.105601	-0.000459444	-0.000459444	196.967	10.2	2.54	6.1	2.1	24	SC1=NC(N)=CC(N)=N1.Clc1cc2nccc(c2cc1)NC(C)CCCN(CC)CC	J. Am. Chem. Soc. 2013 135 (35) 12940â€“12943"	COMPLEMENTARY	AuSphericalDoubleMonomerPDT/CQ	Gram-RES
46	0	0	0.0146867	0	0.5	0	0.268734	Au	MBC (uM)	81.2319	Pseudomonas aeruginosa	ATCC27853	Spherical	3	PDT/CQ	Double	Monomer	10	HI	Gram-	SYS	0	1	1	0	t	0.447154	0.00357143	0.000571429	0.114325	0.0458025	0.0470383	-0.143756	-0.119614	-0.149464	-0.105601	-0.000459444	-0.000459444	196.967	10.2	2.54	6.1	2.1	24	SC1=NC(N)=CC(N)=N1.Clc1cc2nccc(c2cc1)NC(C)CCCN(CC)CC	J. Am. Chem. Soc. 2013 135 (35) 12940â€“12943"	COMPLEMENTARY	AuSphericalDoubleMonomerPDT/CQ	Gram-SYS
46	1	1	0.755366	1	0.731059	0	0.271247	Au	MBC (uM)	81.2319	Pseudomonas aeruginosa	ATCC27853	Spherical	3	PDT/CQ	Double	Monomer	19	PA	Gram-	SYS	1	1	1	1	t	0.447154	0.00657143	0.00357143	0.102611	0.0205758	0.0222078	-0.143756	-0.119614	-0.149464	-0.105601	-0.000459444	-0.000459444	196.967	10.2	2.54	6.1	2.1	24	SC1=NC(N)=CC(N)=N1.Clc1cc2nccc(c2cc1)NC(C)CCCN(CC)CC	J. Am. Chem. Soc. 2013 135 (35) 12940â€“12943"	COMPLEMENTARY	AuSphericalDoubleMonomerPDT/CQ	Gram-SYS
46	0	0	0.183323	0	0.5	0	0.270622	Au	MBC (uM)	81.2319	Pseudomonas aeruginosa	ATCC27853	Spherical	3	PDT/CQ	Double	Monomer	25	TY	Gram+	SYS	0	1	1	0	t	0.447154	-0.0005	-0.0005	0.10259	0.0124517	0.0135345	-0.143756	-0.119614	-0.149464	-0.105601	-0.000459444	-0.000459444	196.967	10.2	2.54	6.1	2.1	24	SC1=NC(N)=CC(N)=N1.Clc1cc2nccc(c2cc1)NC(C)CCCN(CC)CC	J. Am. Chem. Soc. 2013 135 (35) 12940â€“12943"	COMPLEMENTARY	AuSphericalDoubleMonomerPDT/CQ	Gram+SYS
46	0	0	2.37903e-11	0	0.5	0	0.265478	Au	MBC (uM)	81.2319	Pseudomonas aeruginosa	ATCC27853	Spherical	3	PDT/CQ	Double	Monomer	4	CJ	Gram-	GIT	0	1	1	0	t	0.447154	-0.002	0	0.122397	0.0791961	0.0807547	-0.143756	-0.119614	-0.149464	-0.105601	-0.000459444	-0.000459444	196.967	10.2	2.54	6.1	2.1	24	SC1=NC(N)=CC(N)=N1.Clc1cc2nccc(c2cc1)NC(C)CCCN(CC)CC	J. Am. Chem. Soc. 2013 135 (35) 12940â€“12943"	COMPLEMENTARY	AuSphericalDoubleMonomerPDT/CQ	Gram-GIT
46	1	1	0.755366	1	0.731059	0	0.271247	Au	MBC (uM)	81.2319	Pseudomonas aeruginosa	ATCC27853	Spherical	3	PDT/CQ	Double	Monomer	19	PA	Gram-	SYS	1	1	1	1	t	0.447154	0.00657143	0.00357143	0.102611	0.0205758	0.0222078	-0.143756	-0.119614	-0.149464	-0.105601	-0.000459444	-0.000459444	196.967	10.2	2.54	6.1	2.1	24	SC1=NC(N)=CC(N)=N1.Clc1cc2nccc(c2cc1)NC(C)CCCN(CC)CC	J. Am. Chem. Soc. 2013 135 (35) 12940â€“12943"	COMPLEMENTARY	AuSphericalDoubleMonomerPDT/CQ	Gram-SYS
46	0	0	8.78669e-10	0	0.5	0	0.266515	Au	MBC (uM)	81.2319	Pseudomonas aeruginosa	ATCC27853	Spherical	3	PDT/CQ	Double	Monomer	24	ST	Gram+	RES	0	1	1	0	t	0.447154	0.00133333	0.00233333	0.124568	0.0735856	0.0748657	-0.143756	-0.119614	-0.149464	-0.105601	-0.000459444	-0.000459444	196.967	10.2	2.54	6.1	2.1	24	SC1=NC(N)=CC(N)=N1.Clc1cc2nccc(c2cc1)NC(C)CCCN(CC)CC	J. Am. Chem. Soc. 2013 135 (35) 12940â€“12943"	COMPLEMENTARY	AuSphericalDoubleMonomerPDT/CQ	Gram+RES
46	0	0	1.78314e-11	0	0.5	0	0.265567	Au	MBC (uM)	81.2319	Pseudomonas aeruginosa	ATCC27853	Spherical	3	PDT/CQ	Double	Monomer	9	EF	Gram+	GIT	0	1	1	0	t	0.447154	-0.004	-0.001	0.122096	0.0733832	0.0748523	-0.143756	-0.119614	-0.149464	-0.105601	-0.000459444	-0.000459444	196.967	10.2	2.54	6.1	2.1	24	SC1=NC(N)=CC(N)=N1.Clc1cc2nccc(c2cc1)NC(C)CCCN(CC)CC	J. Am. Chem. Soc. 2013 135 (35) 12940â€“12943"	COMPLEMENTARY	AuSphericalDoubleMonomerPDT/CQ	Gram+GIT
46	0	0	1.29263e-05	0	0.5	0	0.268141	Au	MBC (uM)	81.2319	Pseudomonas aeruginosa	ATCC27853	Spherical	3	PDT/CQ	Double	Monomer	23	SC	Gram-	NO	0	0	1	0	t	0.447154	-0.0035	-0.0025	0.111339	0.0377349	0.0396256	-0.143756	-0.119614	-0.149464	-0.105601	-0.000459444	-0.000459444	196.967	10.2	2.54	6.1	2.1	24	SC1=NC(N)=CC(N)=N1.Clc1cc2nccc(c2cc1)NC(C)CCCN(CC)CC	J. Am. Chem. Soc. 2013 135 (35) 12940â€“12943"	COMPLEMENTARY	AuSphericalDoubleMonomerPDT/CQ	Gram-NO
46	0	0	6.09018e-09	0	0.5	0	0.26696	Au	MBC (uM)	81.2319	Pseudomonas aeruginosa	ATCC27853	Spherical	3	PDT/CQ	Double	Monomer	3	CA	Gram+	NO	0	0	1	0	t	0.447154	-0.00333333	-0.00133333	0.118146	0.0549352	0.0572128	-0.143756	-0.119614	-0.149464	-0.105601	-0.000459444	-0.000459444	196.967	10.2	2.54	6.1	2.1	24	SC1=NC(N)=CC(N)=N1.Clc1cc2nccc(c2cc1)NC(C)CCCN(CC)CC	J. Am. Chem. Soc. 2013 135 (35) 12940â€“12943"	COMPLEMENTARY	AuSphericalDoubleMonomerPDT/CQ	Gram+NO
47	1	1	0.697683	1	0.731059	0	0.270871	Au	MBC (uM)	81.2319	Pseudomonas aeruginosa	ATCC27853	Spherical	4	PDT/DMB	Double	Monomer	19	PA	Gram-	SYS	1	1	1	1	t	0.447154	0.00657143	0.00357143	0.102611	0.0205758	0.0222078	-0.143756	-0.119614	-0.149464	-0.118635	-0.000459444	-0.000459444	196.967	10.2	2.54	6.1	2.5	24	SC1=NC(N)=CC(N)=N1.CN(C(NC(N)=N)=N)C	J. Am. Chem. Soc. 2013 135 (35) 12940â€“12943"	COMPLEMENTARY	AuSphericalDoubleMonomerPDT/DMB	Gram-SYS
47	1	1	0.697683	1	0.731059	0	0.270871	Au	MBC (uM)	81.2319	Pseudomonas aeruginosa	ATCC27853	Spherical	4	PDT/DMB	Double	Monomer	19	PA	Gram-	SYS	1	1	1	1	t	0.447154	0.00657143	0.00357143	0.102611	0.0205758	0.0222078	-0.143756	-0.119614	-0.149464	-0.118635	-0.000459444	-0.000459444	196.967	10.2	2.54	6.1	2.5	24	SC1=NC(N)=CC(N)=N1.CN(C(NC(N)=N)=N)C	J. Am. Chem. Soc. 2013 135 (35) 12940â€“12943"	COMPLEMENTARY	AuSphericalDoubleMonomerPDT/DMB	Gram-SYS
47	0	0	0.04164	0	0.5	0	0.267028	Au	MBC (uM)	81.2319	Pseudomonas aeruginosa	ATCC27853	Spherical	4	PDT/DMB	Double	Monomer	16	MT	Gram-	RES	0	1	1	0	t	0.447154	-0.009	-0.01	0.0993988	0.0302842	0.0319897	-0.143756	-0.119614	-0.149464	-0.118635	-0.000459444	-0.000459444	196.967	10.2	2.54	6.1	2.5	24	SC1=NC(N)=CC(N)=N1.CN(C(NC(N)=N)=N)C	J. Am. Chem. Soc. 2013 135 (35) 12940â€“12943"	COMPLEMENTARY	AuSphericalDoubleMonomerPDT/DMB	Gram-RES
47	0	0	0.482928	0	0.5	0	0.269703	Au	MBC (uM)	81.2319	Pseudomonas aeruginosa	ATCC27853	Spherical	4	PDT/DMB	Double	Monomer	8	EC	Gram-	GIT	0	1	1	0	t	0.447154	-0.004	-0.004	0.100485	0.00996768	0.0108964	-0.143756	-0.119614	-0.149464	-0.118635	-0.000459444	-0.000459444	196.967	10.2	2.54	6.1	2.5	24	SC1=NC(N)=CC(N)=N1.CN(C(NC(N)=N)=N)C	J. Am. Chem. Soc. 2013 135 (35) 12940â€“12943"	COMPLEMENTARY	AuSphericalDoubleMonomerPDT/DMB	Gram-GIT
47	0	0	0.143669	0	0.5	0	0.270246	Au	MBC (uM)	81.2319	Pseudomonas aeruginosa	ATCC27853	Spherical	4	PDT/DMB	Double	Monomer	25	TY	Gram+	SYS	0	1	1	0	t	0.447154	-0.0005	-0.0005	0.10259	0.0124517	0.0135345	-0.143756	-0.119614	-0.149464	-0.118635	-0.000459444	-0.000459444	196.967	10.2	2.54	6.1	2.5	24	SC1=NC(N)=CC(N)=N1.CN(C(NC(N)=N)=N)C	J. Am. Chem. Soc. 2013 135 (35) 12940â€“12943"	COMPLEMENTARY	AuSphericalDoubleMonomerPDT/DMB	Gram+SYS
47	1	1	0.697683	1	0.731059	0	0.270871	Au	MBC (uM)	81.2319	Pseudomonas aeruginosa	ATCC27853	Spherical	4	PDT/DMB	Double	Monomer	19	PA	Gram-	SYS	1	1	1	1	t	0.447154	0.00657143	0.00357143	0.102611	0.0205758	0.0222078	-0.143756	-0.119614	-0.149464	-0.118635	-0.000459444	-0.000459444	196.967	10.2	2.54	6.1	2.5	24	SC1=NC(N)=CC(N)=N1.CN(C(NC(N)=N)=N)C	J. Am. Chem. Soc. 2013 135 (35) 12940â€“12943"	COMPLEMENTARY	AuSphericalDoubleMonomerPDT/DMB	Gram-SYS
47	0	0	0.0110178	0	0.5	0	0.268364	Au	MBC (uM)	81.2319	Pseudomonas aeruginosa	ATCC27853	Spherical	4	PDT/DMB	Double	Monomer	10	HI	Gram-	SYS	0	1	1	0	t	0.447154	0.00357143	0.000571429	0.114325	0.0458025	0.0470383	-0.143756	-0.119614	-0.149464	-0.118635	-0.000459444	-0.000459444	196.967	10.2	2.54	6.1	2.5	24	SC1=NC(N)=CC(N)=N1.CN(C(NC(N)=N)=N)C	J. Am. Chem. Soc. 2013 135 (35) 12940â€“12943"	COMPLEMENTARY	AuSphericalDoubleMonomerPDT/DMB	Gram-SYS
47	0	0	1.7781e-11	0	0.5	0	0.265115	Au	MBC (uM)	81.2319	Pseudomonas aeruginosa	ATCC27853	Spherical	4	PDT/DMB	Double	Monomer	4	CJ	Gram-	GIT	0	1	1	0	t	0.447154	-0.002	0	0.122397	0.0791961	0.0807547	-0.143756	-0.119614	-0.149464	-0.118635	-0.000459444	-0.000459444	196.967	10.2	2.54	6.1	2.5	24	SC1=NC(N)=CC(N)=N1.CN(C(NC(N)=N)=N)C	J. Am. Chem. Soc. 2013 135 (35) 12940â€“12943"	COMPLEMENTARY	AuSphericalDoubleMonomerPDT/DMB	Gram-GIT
47	1	1	0.697683	1	0.731059	0	0.270871	Au	MBC (uM)	81.2319	Pseudomonas aeruginosa	ATCC27853	Spherical	4	PDT/DMB	Double	Monomer	19	PA	Gram-	SYS	1	1	1	1	t	0.447154	0.00657143	0.00357143	0.102611	0.0205758	0.0222078	-0.143756	-0.119614	-0.149464	-0.118635	-0.000459444	-0.000459444	196.967	10.2	2.54	6.1	2.5	24	SC1=NC(N)=CC(N)=N1.CN(C(NC(N)=N)=N)C	J. Am. Chem. Soc. 2013 135 (35) 12940â€“12943"	COMPLEMENTARY	AuSphericalDoubleMonomerPDT/DMB	Gram-SYS
47	0	0	1.33273e-11	0	0.5	0	0.265203	Au	MBC (uM)	81.2319	Pseudomonas aeruginosa	ATCC27853	Spherical	4	PDT/DMB	Double	Monomer	9	EF	Gram+	GIT	0	1	1	0	t	0.447154	-0.004	-0.001	0.122096	0.0733832	0.0748523	-0.143756	-0.119614	-0.149464	-0.118635	-0.000459444	-0.000459444	196.967	10.2	2.54	6.1	2.5	24	SC1=NC(N)=CC(N)=N1.CN(C(NC(N)=N)=N)C	J. Am. Chem. Soc. 2013 135 (35) 12940â€“12943"	COMPLEMENTARY	AuSphericalDoubleMonomerPDT/DMB	Gram+GIT
47	0	0	6.5672e-10	0	0.5	0	0.266151	Au	MBC (uM)	81.2319	Pseudomonas aeruginosa	ATCC27853	Spherical	4	PDT/DMB	Double	Monomer	24	ST	Gram+	RES	0	1	1	0	t	0.447154	0.00133333	0.00233333	0.124568	0.0735856	0.0748657	-0.143756	-0.119614	-0.149464	-0.118635	-0.000459444	-0.000459444	196.967	10.2	2.54	6.1	2.5	24	SC1=NC(N)=CC(N)=N1.CN(C(NC(N)=N)=N)C	J. Am. Chem. Soc. 2013 135 (35) 12940â€“12943"	COMPLEMENTARY	AuSphericalDoubleMonomerPDT/DMB	Gram+RES
47	0	0	6.21071e-15	0	0.5	0	0.263712	Au	MBC (uM)	81.2319	Pseudomonas aeruginosa	ATCC27853	Spherical	4	PDT/DMB	Double	Monomer	6	CT	Gram-	SYS	0	1	1	0	t	0.447154	0.00457143	0.00557143	0.129748	0.11685	0.11775	-0.143756	-0.119614	-0.149464	-0.118635	-0.000459444	-0.000459444	196.967	10.2	2.54	6.1	2.5	24	SC1=NC(N)=CC(N)=N1.CN(C(NC(N)=N)=N)C	J. Am. Chem. Soc. 2013 135 (35) 12940â€“12943"	COMPLEMENTARY	AuSphericalDoubleMonomerPDT/DMB	Gram-SYS
48	0	0	2.50866e-11	0	0.5	0	0.265129	Au	MBC (uM)	81.2319	Pseudomonas aeruginosa	MDR	Spherical	4	PDT/DMB	Double	Monomer	4	CJ	Gram-	GIT	0	1	1	0	t	0.447154	-0.002	0	0.122397	0.0791961	0.0807547	-0.142944	-0.119615	-0.149459	-0.118648	-0.000738822	-0.000738822	196.967	10.2	2.54	6.1	2.5	24	SC1=NC(N)=CC(N)=N1.CN(C(NC(N)=N)=N)C	J. Am. Chem. Soc. 2013 135 (35) 12940â€“12943"	COMPLEMENTARY	AuSphericalDoubleMonomerPDT/DMB	Gram-GIT
48	0	0	0.0154746	0	0.5	0	0.268378	Au	MBC (uM)	81.2319	Pseudomonas aeruginosa	MDR	Spherical	4	PDT/DMB	Double	Monomer	10	HI	Gram-	SYS	0	1	1	0	t	0.447154	0.00357143	0.000571429	0.114325	0.0458025	0.0470383	-0.142944	-0.119615	-0.149459	-0.118648	-0.000738822	-0.000738822	196.967	10.2	2.54	6.1	2.5	24	SC1=NC(N)=CC(N)=N1.CN(C(NC(N)=N)=N)C	J. Am. Chem. Soc. 2013 135 (35) 12940â€“12943"	COMPLEMENTARY	AuSphericalDoubleMonomerPDT/DMB	Gram-SYS
48	1	1	0.765037	1	0.731059	0	0.270885	Au	MBC (uM)	81.2319	Pseudomonas aeruginosa	MDR	Spherical	4	PDT/DMB	Double	Monomer	19	PA	Gram-	SYS	1	1	1	1	t	0.447154	0.00657143	0.00357143	0.102611	0.0205758	0.0222078	-0.142944	-0.119615	-0.149459	-0.118648	-0.000738822	-0.000738822	196.967	10.2	2.54	6.1	2.5	24	SC1=NC(N)=CC(N)=N1.CN(C(NC(N)=N)=N)C	J. Am. Chem. Soc. 2013 135 (35) 12940â€“12943"	COMPLEMENTARY	AuSphericalDoubleMonomerPDT/DMB	Gram-SYS
48	1	1	0.765037	1	0.731059	0	0.270885	Au	MBC (uM)	81.2319	Pseudomonas aeruginosa	MDR	Spherical	4	PDT/DMB	Double	Monomer	19	PA	Gram-	SYS	1	1	1	1	t	0.447154	0.00657143	0.00357143	0.102611	0.0205758	0.0222078	-0.142944	-0.119615	-0.149459	-0.118648	-0.000738822	-0.000738822	196.967	10.2	2.54	6.1	2.5	24	SC1=NC(N)=CC(N)=N1.CN(C(NC(N)=N)=N)C	J. Am. Chem. Soc. 2013 135 (35) 12940â€“12943"	COMPLEMENTARY	AuSphericalDoubleMonomerPDT/DMB	Gram-SYS
48	0	0	0.0577603	0	0.5	0	0.267042	Au	MBC (uM)	81.2319	Pseudomonas aeruginosa	MDR	Spherical	4	PDT/DMB	Double	Monomer	16	MT	Gram-	RES	0	1	1	0	t	0.447154	-0.009	-0.01	0.0993988	0.0302842	0.0319897	-0.142944	-0.119615	-0.149459	-0.118648	-0.000738822	-0.000738822	196.967	10.2	2.54	6.1	2.5	24	SC1=NC(N)=CC(N)=N1.CN(C(NC(N)=N)=N)C	J. Am. Chem. Soc. 2013 135 (35) 12940â€“12943"	COMPLEMENTARY	AuSphericalDoubleMonomerPDT/DMB	Gram-RES
48	0	0	0.1914	0	0.5	0	0.27026	Au	MBC (uM)	81.2319	Pseudomonas aeruginosa	MDR	Spherical	4	PDT/DMB	Double	Monomer	25	TY	Gram+	SYS	0	1	1	0	t	0.447154	-0.0005	-0.0005	0.10259	0.0124517	0.0135345	-0.142944	-0.119615	-0.149459	-0.118648	-0.000738822	-0.000738822	196.967	10.2	2.54	6.1	2.5	24	SC1=NC(N)=CC(N)=N1.CN(C(NC(N)=N)=N)C	J. Am. Chem. Soc. 2013 135 (35) 12940â€“12943"	COMPLEMENTARY	AuSphericalDoubleMonomerPDT/DMB	Gram+SYS
48	1	1	0.765037	1	0.731059	0	0.270885	Au	MBC (uM)	81.2319	Pseudomonas aeruginosa	MDR	Spherical	4	PDT/DMB	Double	Monomer	19	PA	Gram-	SYS	1	1	1	1	t	0.447154	0.00657143	0.00357143	0.102611	0.0205758	0.0222078	-0.142944	-0.119615	-0.149459	-0.118648	-0.000738822	-0.000738822	196.967	10.2	2.54	6.1	2.5	24	SC1=NC(N)=CC(N)=N1.CN(C(NC(N)=N)=N)C	J. Am. Chem. Soc. 2013 135 (35) 12940â€“12943"	COMPLEMENTARY	AuSphericalDoubleMonomerPDT/DMB	Gram-SYS
48	1	1	0.765037	1	0.731059	0	0.270885	Au	MBC (uM)	81.2319	Pseudomonas aeruginosa	MDR	Spherical	4	PDT/DMB	Double	Monomer	19	PA	Gram-	SYS	1	1	1	1	t	0.447154	0.00657143	0.00357143	0.102611	0.0205758	0.0222078	-0.142944	-0.119615	-0.149459	-0.118648	-0.000738822	-0.000738822	196.967	10.2	2.54	6.1	2.5	24	SC1=NC(N)=CC(N)=N1.CN(C(NC(N)=N)=N)C	J. Am. Chem. Soc. 2013 135 (35) 12940â€“12943"	COMPLEMENTARY	AuSphericalDoubleMonomerPDT/DMB	Gram-SYS
48	0	0	1.8803e-11	0	0.5	0	0.265217	Au	MBC (uM)	81.2319	Pseudomonas aeruginosa	MDR	Spherical	4	PDT/DMB	Double	Monomer	9	EF	Gram+	GIT	0	1	1	0	t	0.447154	-0.004	-0.001	0.122096	0.0733832	0.0748523	-0.142944	-0.119615	-0.149459	-0.118648	-0.000738822	-0.000738822	196.967	10.2	2.54	6.1	2.5	24	SC1=NC(N)=CC(N)=N1.CN(C(NC(N)=N)=N)C	J. Am. Chem. Soc. 2013 135 (35) 12940â€“12943"	COMPLEMENTARY	AuSphericalDoubleMonomerPDT/DMB	Gram+GIT
48	0	0	9.26546e-10	0	0.5	0	0.266164	Au	MBC (uM)	81.2319	Pseudomonas aeruginosa	MDR	Spherical	4	PDT/DMB	Double	Monomer	24	ST	Gram+	RES	0	1	1	0	t	0.447154	0.00133333	0.00233333	0.124568	0.0735856	0.0748657	-0.142944	-0.119615	-0.149459	-0.118648	-0.000738822	-0.000738822	196.967	10.2	2.54	6.1	2.5	24	SC1=NC(N)=CC(N)=N1.CN(C(NC(N)=N)=N)C	J. Am. Chem. Soc. 2013 135 (35) 12940â€“12943"	COMPLEMENTARY	AuSphericalDoubleMonomerPDT/DMB	Gram+RES
48	0	0	1.36306e-05	0	0.5	0	0.267784	Au	MBC (uM)	81.2319	Pseudomonas aeruginosa	MDR	Spherical	4	PDT/DMB	Double	Monomer	23	SC	Gram-	NO	0	0	1	0	t	0.447154	-0.0035	-0.0025	0.111339	0.0377349	0.0396256	-0.142944	-0.119615	-0.149459	-0.118648	-0.000738822	-0.000738822	196.967	10.2	2.54	6.1	2.5	24	SC1=NC(N)=CC(N)=N1.CN(C(NC(N)=N)=N)C	J. Am. Chem. Soc. 2013 135 (35) 12940â€“12943"	COMPLEMENTARY	AuSphericalDoubleMonomerPDT/DMB	Gram-NO
48	0	0	8.76249e-15	0	0.5	0	0.263725	Au	MBC (uM)	81.2319	Pseudomonas aeruginosa	MDR	Spherical	4	PDT/DMB	Double	Monomer	6	CT	Gram-	SYS	0	1	1	0	t	0.447154	0.00457143	0.00557143	0.129748	0.11685	0.11775	-0.142944	-0.119615	-0.149459	-0.118648	-0.000738822	-0.000738822	196.967	10.2	2.54	6.1	2.5	24	SC1=NC(N)=CC(N)=N1.CN(C(NC(N)=N)=N)C	J. Am. Chem. Soc. 2013 135 (35) 12940â€“12943"	COMPLEMENTARY	AuSphericalDoubleMonomerPDT/DMB	Gram-SYS
48	0	0	0.0154746	0	0.5	0	0.268378	Au	MBC (uM)	81.2319	Pseudomonas aeruginosa	MDR	Spherical	4	PDT/DMB	Double	Monomer	10	HI	Gram-	SYS	0	1	1	0	t	0.447154	0.00357143	0.000571429	0.114325	0.0458025	0.0470383	-0.142944	-0.119615	-0.149459	-0.118648	-0.000738822	-0.000738822	196.967	10.2	2.54	6.1	2.5	24	SC1=NC(N)=CC(N)=N1.CN(C(NC(N)=N)=N)C	J. Am. Chem. Soc. 2013 135 (35) 12940â€“12943"	COMPLEMENTARY	AuSphericalDoubleMonomerPDT/DMB	Gram-SYS
48	0	0	2.50866e-11	0	0.5	0	0.265129	Au	MBC (uM)	81.2319	Pseudomonas aeruginosa	MDR	Spherical	4	PDT/DMB	Double	Monomer	4	CJ	Gram-	GIT	0	1	1	0	t	0.447154	-0.002	0	0.122397	0.0791961	0.0807547	-0.142944	-0.119615	-0.149459	-0.118648	-0.000738822	-0.000738822	196.967	10.2	2.54	6.1	2.5	24	SC1=NC(N)=CC(N)=N1.CN(C(NC(N)=N)=N)C	J. Am. Chem. Soc. 2013 135 (35) 12940â€“12943"	COMPLEMENTARY	AuSphericalDoubleMonomerPDT/DMB	Gram-GIT
49	1	1	0.740154	1	0.731059	0	0.271143	Au	MBC (uM)	81.2319	Pseudomonas aeruginosa	ATCC27853	Spherical	5	PDT/CPB	Double	Monomer	19	PA	Gram-	SYS	1	1	1	1	t	0.447154	0.00657143	0.00357143	0.102611	0.0205758	0.0222078	-0.143756	-0.119614	-0.149464	-0.109213	-0.000459444	-0.000459444	196.967	10.2	2.54	6.1	2.2	24	SC1=NC(N)=CC(N)=N1.N=C(NC(N)=N)NC1=CC(Cl)=CC=C1	J. Am. Chem. Soc. 2013 135 (35) 12940â€“12943"	COMPLEMENTARY	AuSphericalDoubleMonomerPDT/CPB	Gram-SYS
49	1	1	0.740154	1	0.731059	0	0.271143	Au	MBC (uM)	81.2319	Pseudomonas aeruginosa	ATCC27853	Spherical	5	PDT/CPB	Double	Monomer	19	PA	Gram-	SYS	1	1	1	1	t	0.447154	0.00657143	0.00357143	0.102611	0.0205758	0.0222078	-0.143756	-0.119614	-0.149464	-0.109213	-0.000459444	-0.000459444	196.967	10.2	2.54	6.1	2.2	24	SC1=NC(N)=CC(N)=N1.N=C(NC(N)=N)NC1=CC(Cl)=CC=C1	J. Am. Chem. Soc. 2013 135 (35) 12940â€“12943"	COMPLEMENTARY	AuSphericalDoubleMonomerPDT/CPB	Gram-SYS
49	0	0	0.0508984	0	0.5	0	0.267296	Au	MBC (uM)	81.2319	Pseudomonas aeruginosa	ATCC27853	Spherical	5	PDT/CPB	Double	Monomer	16	MT	Gram-	RES	0	1	1	0	t	0.447154	-0.009	-0.01	0.0993988	0.0302842	0.0319897	-0.143756	-0.119614	-0.149464	-0.109213	-0.000459444	-0.000459444	196.967	10.2	2.54	6.1	2.2	24	SC1=NC(N)=CC(N)=N1.N=C(NC(N)=N)NC1=CC(Cl)=CC=C1	J. Am. Chem. Soc. 2013 135 (35) 12940â€“12943"	COMPLEMENTARY	AuSphericalDoubleMonomerPDT/CPB	Gram-RES
49	0	0	0.171552	0	0.5	0	0.270518	Au	MBC (uM)	81.2319	Pseudomonas aeruginosa	ATCC27853	Spherical	5	PDT/CPB	Double	Monomer	25	TY	Gram+	SYS	0	1	1	0	t	0.447154	-0.0005	-0.0005	0.10259	0.0124517	0.0135345	-0.143756	-0.119614	-0.149464	-0.109213	-0.000459444	-0.000459444	196.967	10.2	2.54	6.1	2.2	24	SC1=NC(N)=CC(N)=N1.N=C(NC(N)=N)NC1=CC(Cl)=CC=C1	J. Am. Chem. Soc. 2013 135 (35) 12940â€“12943"	COMPLEMENTARY	AuSphericalDoubleMonomerPDT/CPB	Gram+SYS
49	0	0	0.0135639	0	0.5	0	0.268632	Au	MBC (uM)	81.2319	Pseudomonas aeruginosa	ATCC27853	Spherical	5	PDT/CPB	Double	Monomer	10	HI	Gram-	SYS	0	1	1	0	t	0.447154	0.00357143	0.000571429	0.114325	0.0458025	0.0470383	-0.143756	-0.119614	-0.149464	-0.109213	-0.000459444	-0.000459444	196.967	10.2	2.54	6.1	2.2	24	SC1=NC(N)=CC(N)=N1.N=C(NC(N)=N)NC1=CC(Cl)=CC=C1	J. Am. Chem. Soc. 2013 135 (35) 12940â€“12943"	COMPLEMENTARY	AuSphericalDoubleMonomerPDT/CPB	Gram-SYS
49	0	0	2.19465e-11	0	0.5	0	0.265377	Au	MBC (uM)	81.2319	Pseudomonas aeruginosa	ATCC27853	Spherical	5	PDT/CPB	Double	Monomer	4	CJ	Gram-	GIT	0	1	1	0	t	0.447154	-0.002	0	0.122397	0.0791961	0.0807547	-0.143756	-0.119614	-0.149464	-0.109213	-0.000459444	-0.000459444	196.967	10.2	2.54	6.1	2.2	24	SC1=NC(N)=CC(N)=N1.N=C(NC(N)=N)NC1=CC(Cl)=CC=C1	J. Am. Chem. Soc. 2013 135 (35) 12940â€“12943"	COMPLEMENTARY	AuSphericalDoubleMonomerPDT/CPB	Gram-GIT
49	1	1	0.740154	1	0.731059	0	0.271143	Au	MBC (uM)	81.2319	Pseudomonas aeruginosa	ATCC27853	Spherical	5	PDT/CPB	Double	Monomer	19	PA	Gram-	SYS	1	1	1	1	t	0.447154	0.00657143	0.00357143	0.102611	0.0205758	0.0222078	-0.143756	-0.119614	-0.149464	-0.109213	-0.000459444	-0.000459444	196.967	10.2	2.54	6.1	2.2	24	SC1=NC(N)=CC(N)=N1.N=C(NC(N)=N)NC1=CC(Cl)=CC=C1	J. Am. Chem. Soc. 2013 135 (35) 12940â€“12943"	COMPLEMENTARY	AuSphericalDoubleMonomerPDT/CPB	Gram-SYS
49	0	0	1.64494e-11	0	0.5	0	0.265466	Au	MBC (uM)	81.2319	Pseudomonas aeruginosa	ATCC27853	Spherical	5	PDT/CPB	Double	Monomer	9	EF	Gram+	GIT	0	1	1	0	t	0.447154	-0.004	-0.001	0.122096	0.0733832	0.0748523	-0.143756	-0.119614	-0.149464	-0.109213	-0.000459444	-0.000459444	196.967	10.2	2.54	6.1	2.2	24	SC1=NC(N)=CC(N)=N1.N=C(NC(N)=N)NC1=CC(Cl)=CC=C1	J. Am. Chem. Soc. 2013 135 (35) 12940â€“12943"	COMPLEMENTARY	AuSphericalDoubleMonomerPDT/CPB	Gram+GIT
49	1	1	0.740154	1	0.731059	0	0.271143	Au	MBC (uM)	81.2319	Pseudomonas aeruginosa	ATCC27853	Spherical	5	PDT/CPB	Double	Monomer	19	PA	Gram-	SYS	1	1	1	1	t	0.447154	0.00657143	0.00357143	0.102611	0.0205758	0.0222078	-0.143756	-0.119614	-0.149464	-0.109213	-0.000459444	-0.000459444	196.967	10.2	2.54	6.1	2.2	24	SC1=NC(N)=CC(N)=N1.N=C(NC(N)=N)NC1=CC(Cl)=CC=C1	J. Am. Chem. Soc. 2013 135 (35) 12940â€“12943"	COMPLEMENTARY	AuSphericalDoubleMonomerPDT/CPB	Gram-SYS
49	0	0	8.1057e-10	0	0.5	0	0.266414	Au	MBC (uM)	81.2319	Pseudomonas aeruginosa	ATCC27853	Spherical	5	PDT/CPB	Double	Monomer	24	ST	Gram+	RES	0	1	1	0	t	0.447154	0.00133333	0.00233333	0.124568	0.0735856	0.0748657	-0.143756	-0.119614	-0.149464	-0.109213	-0.000459444	-0.000459444	196.967	10.2	2.54	6.1	2.2	24	SC1=NC(N)=CC(N)=N1.N=C(NC(N)=N)NC1=CC(Cl)=CC=C1	J. Am. Chem. Soc. 2013 135 (35) 12940â€“12943"	COMPLEMENTARY	AuSphericalDoubleMonomerPDT/CPB	Gram+RES
49	0	0	7.66569e-15	0	0.5	0	0.263968	Au	MBC (uM)	81.2319	Pseudomonas aeruginosa	ATCC27853	Spherical	5	PDT/CPB	Double	Monomer	6	CT	Gram-	SYS	0	1	1	0	t	0.447154	0.00457143	0.00557143	0.129748	0.11685	0.11775	-0.143756	-0.119614	-0.149464	-0.109213	-0.000459444	-0.000459444	196.967	10.2	2.54	6.1	2.2	24	SC1=NC(N)=CC(N)=N1.N=C(NC(N)=N)NC1=CC(Cl)=CC=C1	J. Am. Chem. Soc. 2013 135 (35) 12940â€“12943"	COMPLEMENTARY	AuSphericalDoubleMonomerPDT/CPB	Gram-SYS
49	0	0	1.19245e-05	0	0.5	0	0.268038	Au	MBC (uM)	81.2319	Pseudomonas aeruginosa	ATCC27853	Spherical	5	PDT/CPB	Double	Monomer	23	SC	Gram-	NO	0	0	1	0	t	0.447154	-0.0035	-0.0025	0.111339	0.0377349	0.0396256	-0.143756	-0.119614	-0.149464	-0.109213	-0.000459444	-0.000459444	196.967	10.2	2.54	6.1	2.2	24	SC1=NC(N)=CC(N)=N1.N=C(NC(N)=N)NC1=CC(Cl)=CC=C1	J. Am. Chem. Soc. 2013 135 (35) 12940â€“12943"	COMPLEMENTARY	AuSphericalDoubleMonomerPDT/CPB	Gram-NO
50	0	0	0.0190308	0	0.5	0	0.268645	Au	MBC (uM)	81.2319	Pseudomonas aeruginosa	MDR	Spherical	5	PDT/CPB	Double	Monomer	10	HI	Gram-	SYS	0	1	1	0	t	0.447154	0.00357143	0.000571429	0.114325	0.0458025	0.0470383	-0.142944	-0.119615	-0.149459	-0.109226	-0.000738822	-0.000738822	196.967	10.2	2.54	6.1	2.2	24	SC1=NC(N)=CC(N)=N1.N=C(NC(N)=N)NC1=CC(Cl)=CC=C1	J. Am. Chem. Soc. 2013 135 (35) 12940â€“12943"	COMPLEMENTARY	AuSphericalDoubleMonomerPDT/CPB	Gram-SYS
50	1	1	0.800748	1	0.731059	0	0.271156	Au	MBC (uM)	81.2319	Pseudomonas aeruginosa	MDR	Spherical	5	PDT/CPB	Double	Monomer	19	PA	Gram-	SYS	1	1	1	1	t	0.447154	0.00657143	0.00357143	0.102611	0.0205758	0.0222078	-0.142944	-0.119615	-0.149459	-0.109226	-0.000738822	-0.000738822	196.967	10.2	2.54	6.1	2.2	24	SC1=NC(N)=CC(N)=N1.N=C(NC(N)=N)NC1=CC(Cl)=CC=C1	J. Am. Chem. Soc. 2013 135 (35) 12940â€“12943"	COMPLEMENTARY	AuSphericalDoubleMonomerPDT/CPB	Gram-SYS
50	1	1	0.800748	1	0.731059	0	0.271156	Au	MBC (uM)	81.2319	Pseudomonas aeruginosa	MDR	Spherical	5	PDT/CPB	Double	Monomer	19	PA	Gram-	SYS	1	1	1	1	t	0.447154	0.00657143	0.00357143	0.102611	0.0205758	0.0222078	-0.142944	-0.119615	-0.149459	-0.109226	-0.000738822	-0.000738822	196.967	10.2	2.54	6.1	2.2	24	SC1=NC(N)=CC(N)=N1.N=C(NC(N)=N)NC1=CC(Cl)=CC=C1	J. Am. Chem. Soc. 2013 135 (35) 12940â€“12943"	COMPLEMENTARY	AuSphericalDoubleMonomerPDT/CPB	Gram-SYS
50	0	0	0.0703399	0	0.5	0	0.26731	Au	MBC (uM)	81.2319	Pseudomonas aeruginosa	MDR	Spherical	5	PDT/CPB	Double	Monomer	16	MT	Gram-	RES	0	1	1	0	t	0.447154	-0.009	-0.01	0.0993988	0.0302842	0.0319897	-0.142944	-0.119615	-0.149459	-0.109226	-0.000738822	-0.000738822	196.967	10.2	2.54	6.1	2.2	24	SC1=NC(N)=CC(N)=N1.N=C(NC(N)=N)NC1=CC(Cl)=CC=C1	J. Am. Chem. Soc. 2013 135 (35) 12940â€“12943"	COMPLEMENTARY	AuSphericalDoubleMonomerPDT/CPB	Gram-RES
50	0	0	0.2261	0	0.5	0	0.270531	Au	MBC (uM)	81.2319	Pseudomonas aeruginosa	MDR	Spherical	5	PDT/CPB	Double	Monomer	25	TY	Gram+	SYS	0	1	1	0	t	0.447154	-0.0005	-0.0005	0.10259	0.0124517	0.0135345	-0.142944	-0.119615	-0.149459	-0.109226	-0.000738822	-0.000738822	196.967	10.2	2.54	6.1	2.2	24	SC1=NC(N)=CC(N)=N1.N=C(NC(N)=N)NC1=CC(Cl)=CC=C1	J. Am. Chem. Soc. 2013 135 (35) 12940â€“12943"	COMPLEMENTARY	AuSphericalDoubleMonomerPDT/CPB	Gram+SYS
50	0	0	3.09636e-11	0	0.5	0	0.265391	Au	MBC (uM)	81.2319	Pseudomonas aeruginosa	MDR	Spherical	5	PDT/CPB	Double	Monomer	4	CJ	Gram-	GIT	0	1	1	0	t	0.447154	-0.002	0	0.122397	0.0791961	0.0807547	-0.142944	-0.119615	-0.149459	-0.109226	-0.000738822	-0.000738822	196.967	10.2	2.54	6.1	2.2	24	SC1=NC(N)=CC(N)=N1.N=C(NC(N)=N)NC1=CC(Cl)=CC=C1	J. Am. Chem. Soc. 2013 135 (35) 12940â€“12943"	COMPLEMENTARY	AuSphericalDoubleMonomerPDT/CPB	Gram-GIT
50	1	1	0.800748	1	0.731059	0	0.271156	Au	MBC (uM)	81.2319	Pseudomonas aeruginosa	MDR	Spherical	5	PDT/CPB	Double	Monomer	19	PA	Gram-	SYS	1	1	1	1	t	0.447154	0.00657143	0.00357143	0.102611	0.0205758	0.0222078	-0.142944	-0.119615	-0.149459	-0.109226	-0.000738822	-0.000738822	196.967	10.2	2.54	6.1	2.2	24	SC1=NC(N)=CC(N)=N1.N=C(NC(N)=N)NC1=CC(Cl)=CC=C1	J. Am. Chem. Soc. 2013 135 (35) 12940â€“12943"	COMPLEMENTARY	AuSphericalDoubleMonomerPDT/CPB	Gram-SYS
50	1	1	0.800748	1	0.731059	0	0.271156	Au	MBC (uM)	81.2319	Pseudomonas aeruginosa	MDR	Spherical	5	PDT/CPB	Double	Monomer	19	PA	Gram-	SYS	1	1	1	1	t	0.447154	0.00657143	0.00357143	0.102611	0.0205758	0.0222078	-0.142944	-0.119615	-0.149459	-0.109226	-0.000738822	-0.000738822	196.967	10.2	2.54	6.1	2.2	24	SC1=NC(N)=CC(N)=N1.N=C(NC(N)=N)NC1=CC(Cl)=CC=C1	J. Am. Chem. Soc. 2013 135 (35) 12940â€“12943"	COMPLEMENTARY	AuSphericalDoubleMonomerPDT/CPB	Gram-SYS
50	0	0	2.3208e-11	0	0.5	0	0.265479	Au	MBC (uM)	81.2319	Pseudomonas aeruginosa	MDR	Spherical	5	PDT/CPB	Double	Monomer	9	EF	Gram+	GIT	0	1	1	0	t	0.447154	-0.004	-0.001	0.122096	0.0733832	0.0748523	-0.142944	-0.119615	-0.149459	-0.109226	-0.000738822	-0.000738822	196.967	10.2	2.54	6.1	2.2	24	SC1=NC(N)=CC(N)=N1.N=C(NC(N)=N)NC1=CC(Cl)=CC=C1	J. Am. Chem. Soc. 2013 135 (35) 12940â€“12943"	COMPLEMENTARY	AuSphericalDoubleMonomerPDT/CPB	Gram+GIT
50	0	0	1.14361e-09	0	0.5	0	0.266427	Au	MBC (uM)	81.2319	Pseudomonas aeruginosa	MDR	Spherical	5	PDT/CPB	Double	Monomer	24	ST	Gram+	RES	0	1	1	0	t	0.447154	0.00133333	0.00233333	0.124568	0.0735856	0.0748657	-0.142944	-0.119615	-0.149459	-0.109226	-0.000738822	-0.000738822	196.967	10.2	2.54	6.1	2.2	24	SC1=NC(N)=CC(N)=N1.N=C(NC(N)=N)NC1=CC(Cl)=CC=C1	J. Am. Chem. Soc. 2013 135 (35) 12940â€“12943"	COMPLEMENTARY	AuSphericalDoubleMonomerPDT/CPB	Gram+RES
50	0	0	0.0190308	0	0.5	0	0.268645	Au	MBC (uM)	81.2319	Pseudomonas aeruginosa	MDR	Spherical	5	PDT/CPB	Double	Monomer	10	HI	Gram-	SYS	0	1	1	0	t	0.447154	0.00357143	0.000571429	0.114325	0.0458025	0.0470383	-0.142944	-0.119615	-0.149459	-0.109226	-0.000738822	-0.000738822	196.967	10.2	2.54	6.1	2.2	24	SC1=NC(N)=CC(N)=N1.N=C(NC(N)=N)NC1=CC(Cl)=CC=C1	J. Am. Chem. Soc. 2013 135 (35) 12940â€“12943"	COMPLEMENTARY	AuSphericalDoubleMonomerPDT/CPB	Gram-SYS
51	1	1	0.770935	1	0.731059	0	0.271358	Au	MBC (uM)	81.2319	Pseudomonas aeruginosa	ATCC27853	Spherical	6	PDT/G	Double	Monomer	19	PA	Gram-	SYS	1	1	1	1	t	0.447154	0.00657143	0.00357143	0.102611	0.0205758	0.0222078	-0.143756	-0.119614	-0.149464	-0.101744	-0.000459444	-0.000459444	196.967	10.2	2.54	6.1	2	24	SC1=NC(N)=CC(N)=N1.NC(N)=N	J. Am. Chem. Soc. 2013 135 (35) 12940â€“12943"	COMPLEMENTARY	AuSphericalDoubleMonomerPDT/G	Gram-SYS
51	1	1	0.770935	1	0.731059	0	0.271358	Au	MBC (uM)	81.2319	Pseudomonas aeruginosa	ATCC27853	Spherical	6	PDT/G	Double	Monomer	19	PA	Gram-	SYS	1	1	1	1	t	0.447154	0.00657143	0.00357143	0.102611	0.0205758	0.0222078	-0.143756	-0.119614	-0.149464	-0.101744	-0.000459444	-0.000459444	196.967	10.2	2.54	6.1	2	24	SC1=NC(N)=CC(N)=N1.NC(N)=N	J. Am. Chem. Soc. 2013 135 (35) 12940â€“12943"	COMPLEMENTARY	AuSphericalDoubleMonomerPDT/G	Gram-SYS
51	0	0	0.0595885	0	0.5	0	0.267509	Au	MBC (uM)	81.2319	Pseudomonas aeruginosa	ATCC27853	Spherical	6	PDT/G	Double	Monomer	16	MT	Gram-	RES	0	1	1	0	t	0.447154	-0.009	-0.01	0.0993988	0.0302842	0.0319897	-0.143756	-0.119614	-0.149464	-0.101744	-0.000459444	-0.000459444	196.967	10.2	2.54	6.1	2	24	SC1=NC(N)=CC(N)=N1.NC(N)=N	J. Am. Chem. Soc. 2013 135 (35) 12940â€“12943"	COMPLEMENTARY	AuSphericalDoubleMonomerPDT/G	Gram-RES
51	1	1	0.770935	1	0.731059	0	0.271358	Au	MBC (uM)	81.2319	Pseudomonas aeruginosa	ATCC27853	Spherical	6	PDT/G	Double	Monomer	19	PA	Gram-	SYS	1	1	1	1	t	0.447154	0.00657143	0.00357143	0.102611	0.0205758	0.0222078	-0.143756	-0.119614	-0.149464	-0.101744	-0.000459444	-0.000459444	196.967	10.2	2.54	6.1	2	24	SC1=NC(N)=CC(N)=N1.NC(N)=N	J. Am. Chem. Soc. 2013 135 (35) 12940â€“12943"	COMPLEMENTARY	AuSphericalDoubleMonomerPDT/G	Gram-SYS
51	0	0	0.196575	0	0.5	0	0.270733	Au	MBC (uM)	81.2319	Pseudomonas aeruginosa	ATCC27853	Spherical	6	PDT/G	Double	Monomer	25	TY	Gram+	SYS	0	1	1	0	t	0.447154	-0.0005	-0.0005	0.10259	0.0124517	0.0135345	-0.143756	-0.119614	-0.149464	-0.101744	-0.000459444	-0.000459444	196.967	10.2	2.54	6.1	2	24	SC1=NC(N)=CC(N)=N1.NC(N)=N	J. Am. Chem. Soc. 2013 135 (35) 12940â€“12943"	COMPLEMENTARY	AuSphericalDoubleMonomerPDT/G	Gram+SYS
51	1	1	0.770935	1	0.731059	0	0.271358	Au	MBC (uM)	81.2319	Pseudomonas aeruginosa	ATCC27853	Spherical	6	PDT/G	Double	Monomer	19	PA	Gram-	SYS	1	1	1	1	t	0.447154	0.00657143	0.00357143	0.102611	0.0205758	0.0222078	-0.143756	-0.119614	-0.149464	-0.101744	-0.000459444	-0.000459444	196.967	10.2	2.54	6.1	2	24	SC1=NC(N)=CC(N)=N1.NC(N)=N	J. Am. Chem. Soc. 2013 135 (35) 12940â€“12943"	COMPLEMENTARY	AuSphericalDoubleMonomerPDT/G	Gram-SYS
51	0	0	2.5931e-11	0	0.5	0	0.265585	Au	MBC (uM)	81.2319	Pseudomonas aeruginosa	ATCC27853	Spherical	6	PDT/G	Double	Monomer	4	CJ	Gram-	GIT	0	1	1	0	t	0.447154	-0.002	0	0.122397	0.0791961	0.0807547	-0.143756	-0.119614	-0.149464	-0.101744	-0.000459444	-0.000459444	196.967	10.2	2.54	6.1	2	24	SC1=NC(N)=CC(N)=N1.NC(N)=N	J. Am. Chem. Soc. 2013 135 (35) 12940â€“12943"	COMPLEMENTARY	AuSphericalDoubleMonomerPDT/G	Gram-GIT
51	0	0	1.94359e-11	0	0.5	0	0.265675	Au	MBC (uM)	81.2319	Pseudomonas aeruginosa	ATCC27853	Spherical	6	PDT/G	Double	Monomer	9	EF	Gram+	GIT	0	1	1	0	t	0.447154	-0.004	-0.001	0.122096	0.0733832	0.0748523	-0.143756	-0.119614	-0.149464	-0.101744	-0.000459444	-0.000459444	196.967	10.2	2.54	6.1	2	24	SC1=NC(N)=CC(N)=N1.NC(N)=N	J. Am. Chem. Soc. 2013 135 (35) 12940â€“12943"	COMPLEMENTARY	AuSphericalDoubleMonomerPDT/G	Gram+GIT
51	0	0	9.57731e-10	0	0.5	0	0.266623	Au	MBC (uM)	81.2319	Pseudomonas aeruginosa	ATCC27853	Spherical	6	PDT/G	Double	Monomer	24	ST	Gram+	RES	0	1	1	0	t	0.447154	0.00133333	0.00233333	0.124568	0.0735856	0.0748657	-0.143756	-0.119614	-0.149464	-0.101744	-0.000459444	-0.000459444	196.967	10.2	2.54	6.1	2	24	SC1=NC(N)=CC(N)=N1.NC(N)=N	J. Am. Chem. Soc. 2013 135 (35) 12940â€“12943"	COMPLEMENTARY	AuSphericalDoubleMonomerPDT/G	Gram+RES
51	0	0	0.0159871	0	0.5	0	0.268844	Au	MBC (uM)	81.2319	Pseudomonas aeruginosa	ATCC27853	Spherical	6	PDT/G	Double	Monomer	10	HI	Gram-	SYS	0	1	1	0	t	0.447154	0.00357143	0.000571429	0.114325	0.0458025	0.0470383	-0.143756	-0.119614	-0.149464	-0.101744	-0.000459444	-0.000459444	196.967	10.2	2.54	6.1	2	24	SC1=NC(N)=CC(N)=N1.NC(N)=N	J. Am. Chem. Soc. 2013 135 (35) 12940â€“12943"	COMPLEMENTARY	AuSphericalDoubleMonomerPDT/G	Gram-SYS
51	0	0	9.05742e-15	0	0.5	0	0.264172	Au	MBC (uM)	81.2319	Pseudomonas aeruginosa	ATCC27853	Spherical	6	PDT/G	Double	Monomer	6	CT	Gram-	SYS	0	1	1	0	t	0.447154	0.00457143	0.00557143	0.129748	0.11685	0.11775	-0.143756	-0.119614	-0.149464	-0.101744	-0.000459444	-0.000459444	196.967	10.2	2.54	6.1	2	24	SC1=NC(N)=CC(N)=N1.NC(N)=N	J. Am. Chem. Soc. 2013 135 (35) 12940â€“12943"	COMPLEMENTARY	AuSphericalDoubleMonomerPDT/G	Gram-SYS
51	0	0	1.40894e-05	0	0.5	0	0.268251	Au	MBC (uM)	81.2319	Pseudomonas aeruginosa	ATCC27853	Spherical	6	PDT/G	Double	Monomer	23	SC	Gram-	NO	0	0	1	0	t	0.447154	-0.0035	-0.0025	0.111339	0.0377349	0.0396256	-0.143756	-0.119614	-0.149464	-0.101744	-0.000459444	-0.000459444	196.967	10.2	2.54	6.1	2	24	SC1=NC(N)=CC(N)=N1.NC(N)=N	J. Am. Chem. Soc. 2013 135 (35) 12940â€“12943"	COMPLEMENTARY	AuSphericalDoubleMonomerPDT/G	Gram-NO
52	0	0	0.0224085	0	0.5	0	0.268858	Au	MBC (uM)	81.2319	Pseudomonas aeruginosa	MDR	Spherical	6	PDT/G	Double	Monomer	10	HI	Gram-	SYS	0	1	1	0	t	0.447154	0.00357143	0.000571429	0.114325	0.0458025	0.0470383	-0.142944	-0.119615	-0.149459	-0.101758	-0.000738822	-0.000738822	196.967	10.2	2.54	6.1	2	24	SC1=NC(N)=CC(N)=N1.NC(N)=N	J. Am. Chem. Soc. 2013 135 (35) 12940â€“12943"	COMPLEMENTARY	AuSphericalDoubleMonomerPDT/G	Gram-SYS
52	1	1	0.826038	1	0.731059	0	0.271372	Au	MBC (uM)	81.2319	Pseudomonas aeruginosa	MDR	Spherical	6	PDT/G	Double	Monomer	19	PA	Gram-	SYS	1	1	1	1	t	0.447154	0.00657143	0.00357143	0.102611	0.0205758	0.0222078	-0.142944	-0.119615	-0.149459	-0.101758	-0.000738822	-0.000738822	196.967	10.2	2.54	6.1	2	24	SC1=NC(N)=CC(N)=N1.NC(N)=N	J. Am. Chem. Soc. 2013 135 (35) 12940â€“12943"	COMPLEMENTARY	AuSphericalDoubleMonomerPDT/G	Gram-SYS
52	1	1	0.826038	1	0.731059	0	0.271372	Au	MBC (uM)	81.2319	Pseudomonas aeruginosa	MDR	Spherical	6	PDT/G	Double	Monomer	19	PA	Gram-	SYS	1	1	1	1	t	0.447154	0.00657143	0.00357143	0.102611	0.0205758	0.0222078	-0.142944	-0.119615	-0.149459	-0.101758	-0.000738822	-0.000738822	196.967	10.2	2.54	6.1	2	24	SC1=NC(N)=CC(N)=N1.NC(N)=N	J. Am. Chem. Soc. 2013 135 (35) 12940â€“12943"	COMPLEMENTARY	AuSphericalDoubleMonomerPDT/G	Gram-SYS
52	0	0	3.65852e-11	0	0.5	0	0.265599	Au	MBC (uM)	81.2319	Pseudomonas aeruginosa	MDR	Spherical	6	PDT/G	Double	Monomer	4	CJ	Gram-	GIT	0	1	1	0	t	0.447154	-0.002	0	0.122397	0.0791961	0.0807547	-0.142944	-0.119615	-0.149459	-0.101758	-0.000738822	-0.000738822	196.967	10.2	2.54	6.1	2	24	SC1=NC(N)=CC(N)=N1.NC(N)=N	J. Am. Chem. Soc. 2013 135 (35) 12940â€“12943"	COMPLEMENTARY	AuSphericalDoubleMonomerPDT/G	Gram-GIT
52	1	1	0.826038	1	0.731059	0	0.271372	Au	MBC (uM)	81.2319	Pseudomonas aeruginosa	MDR	Spherical	6	PDT/G	Double	Monomer	19	PA	Gram-	SYS	1	1	1	1	t	0.447154	0.00657143	0.00357143	0.102611	0.0205758	0.0222078	-0.142944	-0.119615	-0.149459	-0.101758	-0.000738822	-0.000738822	196.967	10.2	2.54	6.1	2	24	SC1=NC(N)=CC(N)=N1.NC(N)=N	J. Am. Chem. Soc. 2013 135 (35) 12940â€“12943"	COMPLEMENTARY	AuSphericalDoubleMonomerPDT/G	Gram-SYS
52	0	0	1.27788e-14	0	0.5	0	0.264186	Au	MBC (uM)	81.2319	Pseudomonas aeruginosa	MDR	Spherical	6	PDT/G	Double	Monomer	6	CT	Gram-	SYS	0	1	1	0	t	0.447154	0.00457143	0.00557143	0.129748	0.11685	0.11775	-0.142944	-0.119615	-0.149459	-0.101758	-0.000738822	-0.000738822	196.967	10.2	2.54	6.1	2	24	SC1=NC(N)=CC(N)=N1.NC(N)=N	J. Am. Chem. Soc. 2013 135 (35) 12940â€“12943"	COMPLEMENTARY	AuSphericalDoubleMonomerPDT/G	Gram-SYS
52	0	0	0.256616	0	0.5	0	0.270747	Au	MBC (uM)	81.2319	Pseudomonas aeruginosa	MDR	Spherical	6	PDT/G	Double	Monomer	25	TY	Gram+	SYS	0	1	1	0	t	0.447154	-0.0005	-0.0005	0.10259	0.0124517	0.0135345	-0.142944	-0.119615	-0.149459	-0.101758	-0.000738822	-0.000738822	196.967	10.2	2.54	6.1	2	24	SC1=NC(N)=CC(N)=N1.NC(N)=N	J. Am. Chem. Soc. 2013 135 (35) 12940â€“12943"	COMPLEMENTARY	AuSphericalDoubleMonomerPDT/G	Gram+SYS
52	1	1	0.826038	1	0.731059	0	0.271372	Au	MBC (uM)	81.2319	Pseudomonas aeruginosa	MDR	Spherical	6	PDT/G	Double	Monomer	19	PA	Gram-	SYS	1	1	1	1	t	0.447154	0.00657143	0.00357143	0.102611	0.0205758	0.0222078	-0.142944	-0.119615	-0.149459	-0.101758	-0.000738822	-0.000738822	196.967	10.2	2.54	6.1	2	24	SC1=NC(N)=CC(N)=N1.NC(N)=N	J. Am. Chem. Soc. 2013 135 (35) 12940â€“12943"	COMPLEMENTARY	AuSphericalDoubleMonomerPDT/G	Gram-SYS
52	0	0	0.0820624	0	0.5	0	0.267523	Au	MBC (uM)	81.2319	Pseudomonas aeruginosa	MDR	Spherical	6	PDT/G	Double	Monomer	16	MT	Gram-	RES	0	1	1	0	t	0.447154	-0.009	-0.01	0.0993988	0.0302842	0.0319897	-0.142944	-0.119615	-0.149459	-0.101758	-0.000738822	-0.000738822	196.967	10.2	2.54	6.1	2	24	SC1=NC(N)=CC(N)=N1.NC(N)=N	J. Am. Chem. Soc. 2013 135 (35) 12940â€“12943"	COMPLEMENTARY	AuSphericalDoubleMonomerPDT/G	Gram-RES
52	0	0	2.74214e-11	0	0.5	0	0.265688	Au	MBC (uM)	81.2319	Pseudomonas aeruginosa	MDR	Spherical	6	PDT/G	Double	Monomer	9	EF	Gram+	GIT	0	1	1	0	t	0.447154	-0.004	-0.001	0.122096	0.0733832	0.0748523	-0.142944	-0.119615	-0.149459	-0.101758	-0.000738822	-0.000738822	196.967	10.2	2.54	6.1	2	24	SC1=NC(N)=CC(N)=N1.NC(N)=N	J. Am. Chem. Soc. 2013 135 (35) 12940â€“12943"	COMPLEMENTARY	AuSphericalDoubleMonomerPDT/G	Gram+GIT
52	0	0	1.35123e-09	0	0.5	0	0.266636	Au	MBC (uM)	81.2319	Pseudomonas aeruginosa	MDR	Spherical	6	PDT/G	Double	Monomer	24	ST	Gram+	RES	0	1	1	0	t	0.447154	0.00133333	0.00233333	0.124568	0.0735856	0.0748657	-0.142944	-0.119615	-0.149459	-0.101758	-0.000738822	-0.000738822	196.967	10.2	2.54	6.1	2	24	SC1=NC(N)=CC(N)=N1.NC(N)=N	J. Am. Chem. Soc. 2013 135 (35) 12940â€“12943"	COMPLEMENTARY	AuSphericalDoubleMonomerPDT/G	Gram+RES
52	0	0	0.0224085	0	0.5	0	0.268858	Au	MBC (uM)	81.2319	Pseudomonas aeruginosa	MDR	Spherical	6	PDT/G	Double	Monomer	10	HI	Gram-	SYS	0	1	1	0	t	0.447154	0.00357143	0.000571429	0.114325	0.0458025	0.0470383	-0.142944	-0.119615	-0.149459	-0.101758	-0.000738822	-0.000738822	196.967	10.2	2.54	6.1	2	24	SC1=NC(N)=CC(N)=N1.NC(N)=N	J. Am. Chem. Soc. 2013 135 (35) 12940â€“12943"	COMPLEMENTARY	AuSphericalDoubleMonomerPDT/G	Gram-SYS
53	0	0	0.220329	0	0.5	0	0.270296	ZnO	MBC (uM)	147.406	Bacillus sbtilis	MD	N/A	16	N/A	None	None	2	BS	Gram+	NO	0	0	1	1	t	0.447154	0.00566667	0.00366667	0.101743	0.0139675	0.0151696	-0.147399	-0.119733	-0.138991	-0.15039	-3.11552e-05	-3.11552e-05	81.408	11.6	2.545	3.5965	18	24	ND	Int. J. Nanomedicine 2012 7 6003-6009"	COMPLEMENTARY	ZnON/ANoneNoneN/A	Gram+NO
53	0	0	1.29709e-12	0	0.5	0	0.264265	ZnO	MBC (uM)	147.406	Bacillus sbtilis	MD	N/A	16	N/A	None	None	9	EF	Gram+	GIT	0	1	1	0	t	0.447154	-0.004	-0.001	0.122096	0.0733832	0.0748523	-0.147399	-0.119733	-0.138991	-0.15039	-3.11552e-05	-3.11552e-05	81.408	11.6	2.545	3.5965	18	24	ND	Int. J. Nanomedicine 2012 7 6003-6009"	COMPLEMENTARY	ZnON/ANoneNoneN/A	Gram+GIT
53	0	0	0.00108309	0	0.5	0	0.267407	ZnO	MBC (uM)	147.406	Bacillus sbtilis	MD	N/A	16	N/A	None	None	10	HI	Gram-	SYS	0	1	1	0	t	0.447154	0.00357143	0.000571429	0.114325	0.0458025	0.0470383	-0.147399	-0.119733	-0.138991	-0.15039	-3.11552e-05	-3.11552e-05	81.408	11.6	2.545	3.5965	18	24	ND	Int. J. Nanomedicine 2012 7 6003-6009"	COMPLEMENTARY	ZnON/ANoneNoneN/A	Gram-SYS
53	0	0	3.91423e-13	0	0.5	0	0.265358	ZnO	MBC (uM)	147.406	Bacillus sbtilis	MD	N/A	16	N/A	None	None	11	HP	Gram-	GIT	0	1	1	0	t	0.447154	0.003	0.005	0.122648	0.0769584	0.0790809	-0.147399	-0.119733	-0.138991	-0.15039	-3.11552e-05	-3.11552e-05	81.408	11.6	2.545	3.5965	18	24	ND	Int. J. Nanomedicine 2012 7 6003-6009"	COMPLEMENTARY	ZnON/ANoneNoneN/A	Gram-GIT
53	0	0	0.00421092	0	0.5	0	0.26607	ZnO	MBC (uM)	147.406	Bacillus sbtilis	MD	N/A	16	N/A	None	None	16	MT	Gram-	RES	0	1	1	0	t	0.447154	-0.009	-0.01	0.0993988	0.0302842	0.0319897	-0.147399	-0.119733	-0.138991	-0.15039	-3.11552e-05	-3.11552e-05	81.408	11.6	2.545	3.5965	18	24	ND	Int. J. Nanomedicine 2012 7 6003-6009"	COMPLEMENTARY	ZnON/ANoneNoneN/A	Gram-RES
53	0	0	5.01787e-13	0	0.5	0	0.265053	ZnO	MBC (uM)	147.406	Bacillus sbtilis	MD	N/A	16	N/A	None	None	21	PN	Gram+	RES	0	1	1	0	t	0.447154	-0.000666667	0.00233333	0.123904	0.0718737	0.0736966	-0.147399	-0.119733	-0.138991	-0.15039	-3.11552e-05	-3.11552e-05	81.408	11.6	2.545	3.5965	18	24	ND	Int. J. Nanomedicine 2012 7 6003-6009"	COMPLEMENTARY	ZnON/ANoneNoneN/A	Gram+RES
53	0	0	9.40293e-07	0	0.5	0	0.266812	ZnO	MBC (uM)	147.406	Bacillus sbtilis	MD	N/A	16	N/A	None	None	23	SC	Gram-	NO	0	0	1	0	t	0.447154	-0.0035	-0.0025	0.111339	0.0377349	0.0396256	-0.147399	-0.119733	-0.138991	-0.15039	-3.11552e-05	-3.11552e-05	81.408	11.6	2.545	3.5965	18	24	ND	Int. J. Nanomedicine 2012 7 6003-6009"	COMPLEMENTARY	ZnON/ANoneNoneN/A	Gram-NO
53	0	0	6.39159e-11	0	0.5	0	0.265209	ZnO	MBC (uM)	147.406	Bacillus sbtilis	MD	N/A	16	N/A	None	None	24	ST	Gram+	RES	0	1	1	0	t	0.447154	0.00133333	0.00233333	0.124568	0.0735856	0.0748657	-0.147399	-0.119733	-0.138991	-0.15039	-3.11552e-05	-3.11552e-05	81.408	11.6	2.545	3.5965	18	24	ND	Int. J. Nanomedicine 2012 7 6003-6009"	COMPLEMENTARY	ZnON/ANoneNoneN/A	Gram+RES
53	0	0	0.0160663	0	0.5	0	0.269273	ZnO	MBC (uM)	147.406	Bacillus sbtilis	MD	N/A	16	N/A	None	None	25	TY	Gram+	SYS	0	1	1	0	t	0.447154	-0.0005	-0.0005	0.10259	0.0124517	0.0135345	-0.147399	-0.119733	-0.138991	-0.15039	-3.11552e-05	-3.11552e-05	81.408	11.6	2.545	3.5965	18	24	ND	Int. J. Nanomedicine 2012 7 6003-6009"	COMPLEMENTARY	ZnON/ANoneNoneN/A	Gram+SYS
53	0	0	1.29709e-12	0	0.5	0	0.264265	ZnO	MBC (uM)	147.406	Bacillus sbtilis	MD	N/A	16	N/A	None	None	9	EF	Gram+	GIT	0	1	1	0	t	0.447154	-0.004	-0.001	0.122096	0.0733832	0.0748523	-0.147399	-0.119733	-0.138991	-0.15039	-3.11552e-05	-3.11552e-05	81.408	11.6	2.545	3.5965	18	24	ND	Int. J. Nanomedicine 2012 7 6003-6009"	COMPLEMENTARY	ZnON/ANoneNoneN/A	Gram+GIT
53	0	0	0.00421092	0	0.5	0	0.26607	ZnO	MBC (uM)	147.406	Bacillus sbtilis	MD	N/A	16	N/A	None	None	16	MT	Gram-	RES	0	1	1	0	t	0.447154	-0.009	-0.01	0.0993988	0.0302842	0.0319897	-0.147399	-0.119733	-0.138991	-0.15039	-3.11552e-05	-3.11552e-05	81.408	11.6	2.545	3.5965	18	24	ND	Int. J. Nanomedicine 2012 7 6003-6009"	COMPLEMENTARY	ZnON/ANoneNoneN/A	Gram-RES
53	0	0	5.01787e-13	0	0.5	0	0.265053	ZnO	MBC (uM)	147.406	Bacillus sbtilis	MD	N/A	16	N/A	None	None	21	PN	Gram+	RES	0	1	1	0	t	0.447154	-0.000666667	0.00233333	0.123904	0.0718737	0.0736966	-0.147399	-0.119733	-0.138991	-0.15039	-3.11552e-05	-3.11552e-05	81.408	11.6	2.545	3.5965	18	24	ND	Int. J. Nanomedicine 2012 7 6003-6009"	COMPLEMENTARY	ZnON/ANoneNoneN/A	Gram+RES
53	0	0	6.39159e-11	0	0.5	0	0.265209	ZnO	MBC (uM)	147.406	Bacillus sbtilis	MD	N/A	16	N/A	None	None	24	ST	Gram+	RES	0	1	1	0	t	0.447154	0.00133333	0.00233333	0.124568	0.0735856	0.0748657	-0.147399	-0.119733	-0.138991	-0.15039	-3.11552e-05	-3.11552e-05	81.408	11.6	2.545	3.5965	18	24	ND	Int. J. Nanomedicine 2012 7 6003-6009"	COMPLEMENTARY	ZnON/ANoneNoneN/A	Gram+RES
53	0	0	0.220329	0	0.5	0	0.270296	ZnO	MBC (uM)	147.406	Bacillus sbtilis	MD	N/A	16	N/A	None	None	2	BS	Gram+	NO	0	0	1	1	t	0.447154	0.00566667	0.00366667	0.101743	0.0139675	0.0151696	-0.147399	-0.119733	-0.138991	-0.15039	-3.11552e-05	-3.11552e-05	81.408	11.6	2.545	3.5965	18	24	ND	Int. J. Nanomedicine 2012 7 6003-6009"	COMPLEMENTARY	ZnON/ANoneNoneN/A	Gram+NO
53	0	0	3.39636e-11	0	0.5	0	0.264573	ZnO	MBC (uM)	147.406	Bacillus sbtilis	MD	N/A	16	N/A	None	None	12	MB	Gram+	RES	0	1	1	0	t	0.447154	-0.000666667	0.000333333	0.123234	0.0765476	0.0780157	-0.147399	-0.119733	-0.138991	-0.15039	-3.11552e-05	-3.11552e-05	81.408	11.6	2.545	3.5965	18	24	ND	Int. J. Nanomedicine 2012 7 6003-6009"	COMPLEMENTARY	ZnON/ANoneNoneN/A	Gram+RES
53	0	0	0.00108309	0	0.5	0	0.267407	ZnO	MBC (uM)	147.406	Bacillus sbtilis	MD	N/A	16	N/A	None	None	10	HI	Gram-	SYS	0	1	1	0	t	0.447154	0.00357143	0.000571429	0.114325	0.0458025	0.0470383	-0.147399	-0.119733	-0.138991	-0.15039	-3.11552e-05	-3.11552e-05	81.408	11.6	2.545	3.5965	18	24	ND	Int. J. Nanomedicine 2012 7 6003-6009"	COMPLEMENTARY	ZnON/ANoneNoneN/A	Gram-SYS
53	0	0	9.40293e-07	0	0.5	0	0.266812	ZnO	MBC (uM)	147.406	Bacillus sbtilis	MD	N/A	16	N/A	None	None	23	SC	Gram-	NO	0	0	1	0	t	0.447154	-0.0035	-0.0025	0.111339	0.0377349	0.0396256	-0.147399	-0.119733	-0.138991	-0.15039	-3.11552e-05	-3.11552e-05	81.408	11.6	2.545	3.5965	18	24	ND	Int. J. Nanomedicine 2012 7 6003-6009"	COMPLEMENTARY	ZnON/ANoneNoneN/A	Gram-NO
53	0	0	3.91423e-13	0	0.5	0	0.265358	ZnO	MBC (uM)	147.406	Bacillus sbtilis	MD	N/A	16	N/A	None	None	11	HP	Gram-	GIT	0	1	1	0	t	0.447154	0.003	0.005	0.122648	0.0769584	0.0790809	-0.147399	-0.119733	-0.138991	-0.15039	-3.11552e-05	-3.11552e-05	81.408	11.6	2.545	3.5965	18	24	ND	Int. J. Nanomedicine 2012 7 6003-6009"	COMPLEMENTARY	ZnON/ANoneNoneN/A	Gram-GIT
53	0	0	0.0160663	0	0.5	0	0.269273	ZnO	MBC (uM)	147.406	Bacillus sbtilis	MD	N/A	16	N/A	None	None	25	TY	Gram+	SYS	0	1	1	0	t	0.447154	-0.0005	-0.0005	0.10259	0.0124517	0.0135345	-0.147399	-0.119733	-0.138991	-0.15039	-3.11552e-05	-3.11552e-05	81.408	11.6	2.545	3.5965	18	24	ND	Int. J. Nanomedicine 2012 7 6003-6009"	COMPLEMENTARY	ZnON/ANoneNoneN/A	Gram+SYS
53	0	0	3.06925e-12	0	0.5	0	0.264423	ZnO	MBC (uM)	147.406	Bacillus sbtilis	MD	N/A	16	N/A	None	None	17	NG	Gram-	SYS	0	1	1	0	t	0.447154	-0.00442857	-0.00142857	0.120653	0.0699347	0.0714951	-0.147399	-0.119733	-0.138991	-0.15039	-3.11552e-05	-3.11552e-05	81.408	11.6	2.545	3.5965	18	24	ND	Int. J. Nanomedicine 2012 7 6003-6009"	COMPLEMENTARY	ZnON/ANoneNoneN/A	Gram-SYS
53	0	0	3.19814e-13	0	0.5	0	0.261635	ZnO	MBC (uM)	147.406	Bacillus sbtilis	MD	N/A	16	N/A	None	None	15	MP	Gram-	RES	0	1	1	0	t	0.447154	-0.005	-0.004	0.119769	0.105756	0.105967	-0.147399	-0.119733	-0.138991	-0.15039	-3.11552e-05	-3.11552e-05	81.408	11.6	2.545	3.5965	18	24	ND	Int. J. Nanomedicine 2012 7 6003-6009"	COMPLEMENTARY	ZnON/ANoneNoneN/A	Gram-RES
53	0	0	4.84532e-13	0	0.5	0	0.264273	ZnO	MBC (uM)	147.406	Bacillus sbtilis	MD	N/A	16	N/A	None	None	18	NM	Gram-	SYS	0	1	1	0	t	0.447154	-0.00342857	-0.000428571	0.121918	0.0747641	0.0765299	-0.147399	-0.119733	-0.138991	-0.15039	-3.11552e-05	-3.11552e-05	81.408	11.6	2.545	3.5965	18	24	ND	Int. J. Nanomedicine 2012 7 6003-6009"	COMPLEMENTARY	ZnON/ANoneNoneN/A	Gram-SYS
53	0	0	1.73055e-12	0	0.5	0	0.264179	ZnO	MBC (uM)	147.406	Bacillus sbtilis	MD	N/A	16	N/A	None	None	4	CJ	Gram-	GIT	0	1	1	0	t	0.447154	-0.002	0	0.122397	0.0791961	0.0807547	-0.147399	-0.119733	-0.138991	-0.15039	-3.11552e-05	-3.11552e-05	81.408	11.6	2.545	3.5965	18	24	ND	Int. J. Nanomedicine 2012 7 6003-6009"	COMPLEMENTARY	ZnON/ANoneNoneN/A	Gram-GIT
53	0	0	2.51866e-11	0	0.5	0	0.264826	ZnO	MBC (uM)	147.406	Bacillus sbtilis	MD	N/A	16	N/A	None	None	14	ML	Gram+	SYS	0	1	1	0	t	0.447154	0.0005	0.0015	0.124762	0.0763677	0.0778832	-0.147399	-0.119733	-0.138991	-0.15039	-3.11552e-05	-3.11552e-05	81.408	11.6	2.545	3.5965	18	24	ND	Int. J. Nanomedicine 2012 7 6003-6009"	COMPLEMENTARY	ZnON/ANoneNoneN/A	Gram+SYS
53	0	0	0.220329	0	0.5	0	0.270296	ZnO	MBC (uM)	147.406	Bacillus sbtilis	MD	N/A	16	N/A	None	None	2	BS	Gram+	NO	0	0	1	1	t	0.447154	0.00566667	0.00366667	0.101743	0.0139675	0.0151696	-0.147399	-0.119733	-0.138991	-0.15039	-3.11552e-05	-3.11552e-05	81.408	11.6	2.545	3.5965	18	24	ND	Int. J. Nanomedicine 2012 7 6003-6009"	COMPLEMENTARY	ZnON/ANoneNoneN/A	Gram+NO
53	0	0	6.04463e-16	0	0.5	0	0.262795	ZnO	MBC (uM)	147.406	Bacillus sbtilis	MD	N/A	16	N/A	None	None	6	CT	Gram-	SYS	0	1	1	0	t	0.447154	0.00457143	0.00557143	0.129748	0.11685	0.11775	-0.147399	-0.119733	-0.138991	-0.15039	-3.11552e-05	-3.11552e-05	81.408	11.6	2.545	3.5965	18	24	ND	Int. J. Nanomedicine 2012 7 6003-6009"	COMPLEMENTARY	ZnON/ANoneNoneN/A	Gram-SYS
54	1	1	0.620468	1	0.731059	0	0.270441	Au	MBC (uM)	162.464	Pseudomonas aeruginosa	ATCC27853	Spherical	7	PDT	Single	Monomer	19	PA	Gram-	SYS	1	1	1	1	t	0.447154	0.00657143	0.00357143	0.102611	0.0205758	0.0222078	-0.143756	-0.119614	-0.149464	-0.133625	0.00109334	-0.000568066	196.967	10.2	2.54	6.1	3.2	24	SC1=NC(N)=CC(N)=N1	J. Am. Chem. Soc. 2013 135 (35) 12940â€“12943"	COMPLEMENTARY	AuSphericalSingleMonomerPDT	Gram-SYS
54	1	1	0.620468	1	0.731059	0	0.270441	Au	MBC (uM)	162.464	Pseudomonas aeruginosa	ATCC27853	Spherical	7	PDT	Single	Monomer	19	PA	Gram-	SYS	1	1	1	1	t	0.447154	0.00657143	0.00357143	0.102611	0.0205758	0.0222078	-0.143756	-0.119614	-0.149464	-0.133625	0.00109334	-0.000568066	196.967	10.2	2.54	6.1	3.2	24	SC1=NC(N)=CC(N)=N1	J. Am. Chem. Soc. 2013 135 (35) 12940â€“12943"	COMPLEMENTARY	AuSphericalSingleMonomerPDT	Gram-SYS
54	0	0	0.0298601	0	0.5	0	0.266603	Au	MBC (uM)	162.464	Pseudomonas aeruginosa	ATCC27853	Spherical	7	PDT	Single	Monomer	16	MT	Gram-	RES	0	1	1	0	t	0.447154	-0.009	-0.01	0.0993988	0.0302842	0.0319897	-0.143756	-0.119614	-0.149464	-0.133625	0.00109334	-0.000568066	196.967	10.2	2.54	6.1	3.2	24	SC1=NC(N)=CC(N)=N1	J. Am. Chem. Soc. 2013 135 (35) 12940â€“12943"	COMPLEMENTARY	AuSphericalSingleMonomerPDT	Gram-RES
54	1	1	0.620468	1	0.731059	0	0.270441	Au	MBC (uM)	162.464	Pseudomonas aeruginosa	ATCC27853	Spherical	7	PDT	Single	Monomer	19	PA	Gram-	SYS	1	1	1	1	t	0.447154	0.00657143	0.00357143	0.102611	0.0205758	0.0222078	-0.143756	-0.119614	-0.149464	-0.133625	0.00109334	-0.000568066	196.967	10.2	2.54	6.1	3.2	24	SC1=NC(N)=CC(N)=N1	J. Am. Chem. Soc. 2013 135 (35) 12940â€“12943"	COMPLEMENTARY	AuSphericalSingleMonomerPDT	Gram-SYS
54	1	1	0.620468	1	0.731059	0	0.270441	Au	MBC (uM)	162.464	Pseudomonas aeruginosa	ATCC27853	Spherical	7	PDT	Single	Monomer	19	PA	Gram-	SYS	1	1	1	1	t	0.447154	0.00657143	0.00357143	0.102611	0.0205758	0.0222078	-0.143756	-0.119614	-0.149464	-0.133625	0.00109334	-0.000568066	196.967	10.2	2.54	6.1	3.2	24	SC1=NC(N)=CC(N)=N1	J. Am. Chem. Soc. 2013 135 (35) 12940â€“12943"	COMPLEMENTARY	AuSphericalSingleMonomerPDT	Gram-SYS
54	0	0	0.106224	0	0.5	0	0.269815	Au	MBC (uM)	162.464	Pseudomonas aeruginosa	ATCC27853	Spherical	7	PDT	Single	Monomer	25	TY	Gram+	SYS	0	1	1	0	t	0.447154	-0.0005	-0.0005	0.10259	0.0124517	0.0135345	-0.143756	-0.119614	-0.149464	-0.133625	0.00109334	-0.000568066	196.967	10.2	2.54	6.1	3.2	24	SC1=NC(N)=CC(N)=N1	J. Am. Chem. Soc. 2013 135 (35) 12940â€“12943"	COMPLEMENTARY	AuSphericalSingleMonomerPDT	Gram+SYS
54	0	0	1.2596e-11	0	0.5	0	0.2647	Au	MBC (uM)	162.464	Pseudomonas aeruginosa	ATCC27853	Spherical	7	PDT	Single	Monomer	4	CJ	Gram-	GIT	0	1	1	0	t	0.447154	-0.002	0	0.122397	0.0791961	0.0807547	-0.143756	-0.119614	-0.149464	-0.133625	0.00109334	-0.000568066	196.967	10.2	2.54	6.1	3.2	24	SC1=NC(N)=CC(N)=N1	J. Am. Chem. Soc. 2013 135 (35) 12940â€“12943"	COMPLEMENTARY	AuSphericalSingleMonomerPDT	Gram-GIT
54	0	0	9.44096e-12	0	0.5	0	0.264787	Au	MBC (uM)	162.464	Pseudomonas aeruginosa	ATCC27853	Spherical	7	PDT	Single	Monomer	9	EF	Gram+	GIT	0	1	1	0	t	0.447154	-0.004	-0.001	0.122096	0.0733832	0.0748523	-0.143756	-0.119614	-0.149464	-0.133625	0.00109334	-0.000568066	196.967	10.2	2.54	6.1	3.2	24	SC1=NC(N)=CC(N)=N1	J. Am. Chem. Soc. 2013 135 (35) 12940â€“12943"	COMPLEMENTARY	AuSphericalSingleMonomerPDT	Gram+GIT
54	0	0	4.65217e-10	0	0.5	0	0.265733	Au	MBC (uM)	162.464	Pseudomonas aeruginosa	ATCC27853	Spherical	7	PDT	Single	Monomer	24	ST	Gram+	RES	0	1	1	0	t	0.447154	0.00133333	0.00233333	0.124568	0.0735856	0.0748657	-0.143756	-0.119614	-0.149464	-0.133625	0.00109334	-0.000568066	196.967	10.2	2.54	6.1	3.2	24	SC1=NC(N)=CC(N)=N1	J. Am. Chem. Soc. 2013 135 (35) 12940â€“12943"	COMPLEMENTARY	AuSphericalSingleMonomerPDT	Gram+RES
54	0	0	0.00783011	0	0.5	0	0.26794	Au	MBC (uM)	162.464	Pseudomonas aeruginosa	ATCC27853	Spherical	7	PDT	Single	Monomer	10	HI	Gram-	SYS	0	1	1	0	t	0.447154	0.00357143	0.000571429	0.114325	0.0458025	0.0470383	-0.143756	-0.119614	-0.149464	-0.133625	0.00109334	-0.000568066	196.967	10.2	2.54	6.1	3.2	24	SC1=NC(N)=CC(N)=N1	J. Am. Chem. Soc. 2013 135 (35) 12940â€“12943"	COMPLEMENTARY	AuSphericalSingleMonomerPDT	Gram-SYS
54	0	0	6.84397e-06	0	0.5	0	0.267345	Au	MBC (uM)	162.464	Pseudomonas aeruginosa	ATCC27853	Spherical	7	PDT	Single	Monomer	23	SC	Gram-	NO	0	0	1	0	t	0.447154	-0.0035	-0.0025	0.111339	0.0377349	0.0396256	-0.143756	-0.119614	-0.149464	-0.133625	0.00109334	-0.000568066	196.967	10.2	2.54	6.1	3.2	24	SC1=NC(N)=CC(N)=N1	J. Am. Chem. Soc. 2013 135 (35) 12940â€“12943"	COMPLEMENTARY	AuSphericalSingleMonomerPDT	Gram-NO
55	1	0	0.482791	1	0.731059	0	0.269286	Au	MBC (uM)	162.464	Escherichia coli	MDR	Spherical	7	PDT	Single	Monomer	8	EC	Gram-	GIT	1	1	1	1	t	0.447154	-0.004	-0.004	0.100485	0.00996768	0.0108964	-0.142944	-0.119615	-0.149459	-0.133639	0.000813959	-0.000847443	196.967	10.2	2.54	6.1	3.2	24	SC1=NC(N)=CC(N)=N1	J. Am. Chem. Soc. 2013 135 (35) 12940â€“12943"	COMPLEMENTARY	AuSphericalSingleMonomerPDT	Gram-GIT
55	1	0	0.482791	1	0.731059	0	0.269286	Au	MBC (uM)	162.464	Escherichia coli	MDR	Spherical	7	PDT	Single	Monomer	8	EC	Gram-	GIT	1	1	1	1	t	0.447154	-0.004	-0.004	0.100485	0.00996768	0.0108964	-0.142944	-0.119615	-0.149459	-0.133639	0.000813959	-0.000847443	196.967	10.2	2.54	6.1	3.2	24	SC1=NC(N)=CC(N)=N1	J. Am. Chem. Soc. 2013 135 (35) 12940â€“12943"	COMPLEMENTARY	AuSphericalSingleMonomerPDT	Gram-GIT
55	0	0	5.15291e-12	0	0.5	0	0.265591	Au	MBC (uM)	162.464	Escherichia coli	MDR	Spherical	7	PDT	Single	Monomer	21	PN	Gram+	RES	0	1	1	0	t	0.447154	-0.000666667	0.00233333	0.123904	0.0718737	0.0736966	-0.142944	-0.119615	-0.149459	-0.133639	0.000813959	-0.000847443	196.967	10.2	2.54	6.1	3.2	24	SC1=NC(N)=CC(N)=N1	J. Am. Chem. Soc. 2013 135 (35) 12940â€“12943"	COMPLEMENTARY	AuSphericalSingleMonomerPDT	Gram+RES
55	0	0	6.5636e-10	0	0.5	0	0.265747	Au	MBC (uM)	162.464	Escherichia coli	MDR	Spherical	7	PDT	Single	Monomer	24	ST	Gram+	RES	0	1	1	0	t	0.447154	0.00133333	0.00233333	0.124568	0.0735856	0.0748657	-0.142944	-0.119615	-0.149459	-0.133639	0.000813959	-0.000847443	196.967	10.2	2.54	6.1	3.2	24	SC1=NC(N)=CC(N)=N1	J. Am. Chem. Soc. 2013 135 (35) 12940â€“12943"	COMPLEMENTARY	AuSphericalSingleMonomerPDT	Gram+RES
55	0	0	6.5636e-10	0	0.5	0	0.265747	Au	MBC (uM)	162.464	Escherichia coli	MDR	Spherical	7	PDT	Single	Monomer	24	ST	Gram+	RES	0	1	1	0	t	0.447154	0.00133333	0.00233333	0.124568	0.0735856	0.0748657	-0.142944	-0.119615	-0.149459	-0.133639	0.000813959	-0.000847443	196.967	10.2	2.54	6.1	3.2	24	SC1=NC(N)=CC(N)=N1	J. Am. Chem. Soc. 2013 135 (35) 12940â€“12943"	COMPLEMENTARY	AuSphericalSingleMonomerPDT	Gram+RES
55	0	0	5.15291e-12	0	0.5	0	0.265591	Au	MBC (uM)	162.464	Escherichia coli	MDR	Spherical	7	PDT	Single	Monomer	21	PN	Gram+	RES	0	1	1	0	t	0.447154	-0.000666667	0.00233333	0.123904	0.0718737	0.0736966	-0.142944	-0.119615	-0.149459	-0.133639	0.000813959	-0.000847443	196.967	10.2	2.54	6.1	3.2	24	SC1=NC(N)=CC(N)=N1	J. Am. Chem. Soc. 2013 135 (35) 12940â€“12943"	COMPLEMENTARY	AuSphericalSingleMonomerPDT	Gram+RES
55	0	0	0.143601	0	0.5	0	0.269829	Au	MBC (uM)	162.464	Escherichia coli	MDR	Spherical	7	PDT	Single	Monomer	25	TY	Gram+	SYS	0	1	1	0	t	0.447154	-0.0005	-0.0005	0.10259	0.0124517	0.0135345	-0.142944	-0.119615	-0.149459	-0.133639	0.000813959	-0.000847443	196.967	10.2	2.54	6.1	3.2	24	SC1=NC(N)=CC(N)=N1	J. Am. Chem. Soc. 2013 135 (35) 12940â€“12943"	COMPLEMENTARY	AuSphericalSingleMonomerPDT	Gram+SYS
55	1	0	0.482791	1	0.731059	0	0.269286	Au	MBC (uM)	162.464	Escherichia coli	MDR	Spherical	7	PDT	Single	Monomer	8	EC	Gram-	GIT	1	1	1	1	t	0.447154	-0.004	-0.004	0.100485	0.00996768	0.0108964	-0.142944	-0.119615	-0.149459	-0.133639	0.000813959	-0.000847443	196.967	10.2	2.54	6.1	3.2	24	SC1=NC(N)=CC(N)=N1	J. Am. Chem. Soc. 2013 135 (35) 12940â€“12943"	COMPLEMENTARY	AuSphericalSingleMonomerPDT	Gram-GIT
55	0	0	2.85589e-12	0	0.5	0	0.264509	Au	MBC (uM)	162.464	Escherichia coli	MDR	Spherical	7	PDT	Single	Monomer	20	PG	Gram-	SYS	0	1	1	0	t	0.447154	-0.00442857	-0.00142857	0.11973	0.0759019	0.0779623	-0.142944	-0.119615	-0.149459	-0.133639	0.000813959	-0.000847443	196.967	10.2	2.54	6.1	3.2	24	SC1=NC(N)=CC(N)=N1	J. Am. Chem. Soc. 2013 135 (35) 12940â€“12943"	COMPLEMENTARY	AuSphericalSingleMonomerPDT	Gram-SYS
55	0	0	0.0416181	0	0.5	0	0.266617	Au	MBC (uM)	162.464	Escherichia coli	MDR	Spherical	7	PDT	Single	Monomer	16	MT	Gram-	RES	0	1	1	0	t	0.447154	-0.009	-0.01	0.0993988	0.0302842	0.0319897	-0.142944	-0.119615	-0.149459	-0.133639	0.000813959	-0.000847443	196.967	10.2	2.54	6.1	3.2	24	SC1=NC(N)=CC(N)=N1	J. Am. Chem. Soc. 2013 135 (35) 12940â€“12943"	COMPLEMENTARY	AuSphericalSingleMonomerPDT	Gram-RES
55	0	0	0.0110118	0	0.5	0	0.267954	Au	MBC (uM)	162.464	Escherichia coli	MDR	Spherical	7	PDT	Single	Monomer	10	HI	Gram-	SYS	0	1	1	0	t	0.447154	0.00357143	0.000571429	0.114325	0.0458025	0.0470383	-0.142944	-0.119615	-0.149459	-0.133639	0.000813959	-0.000847443	196.967	10.2	2.54	6.1	3.2	24	SC1=NC(N)=CC(N)=N1	J. Am. Chem. Soc. 2013 135 (35) 12940â€“12943"	COMPLEMENTARY	AuSphericalSingleMonomerPDT	Gram-SYS
55	0	0	1.332e-11	0	0.5	0	0.264801	Au	MBC (uM)	162.464	Escherichia coli	MDR	Spherical	7	PDT	Single	Monomer	9	EF	Gram+	GIT	0	1	1	0	t	0.447154	-0.004	-0.001	0.122096	0.0733832	0.0748523	-0.142944	-0.119615	-0.149459	-0.133639	0.000813959	-0.000847443	196.967	10.2	2.54	6.1	3.2	24	SC1=NC(N)=CC(N)=N1	J. Am. Chem. Soc. 2013 135 (35) 12940â€“12943"	COMPLEMENTARY	AuSphericalSingleMonomerPDT	Gram+GIT
55	0	1	0.697567	1	0.731059	0	0.270454	Au	MBC (uM)	162.464	Escherichia coli	MDR	Spherical	7	PDT	Single	Monomer	19	PA	Gram-	SYS	0	1	1	0	t	0.447154	0.00657143	0.00357143	0.102611	0.0205758	0.0222078	-0.142944	-0.119615	-0.149459	-0.133639	0.000813959	-0.000847443	196.967	10.2	2.54	6.1	3.2	24	SC1=NC(N)=CC(N)=N1	J. Am. Chem. Soc. 2013 135 (35) 12940â€“12943"	COMPLEMENTARY	AuSphericalSingleMonomerPDT	Gram-SYS
55	1	0	0.482791	1	0.731059	0	0.269286	Au	MBC (uM)	162.464	Escherichia coli	MDR	Spherical	7	PDT	Single	Monomer	8	EC	Gram-	GIT	1	1	1	1	t	0.447154	-0.004	-0.004	0.100485	0.00996768	0.0108964	-0.142944	-0.119615	-0.149459	-0.133639	0.000813959	-0.000847443	196.967	10.2	2.54	6.1	3.2	24	SC1=NC(N)=CC(N)=N1	J. Am. Chem. Soc. 2013 135 (35) 12940â€“12943"	COMPLEMENTARY	AuSphericalSingleMonomerPDT	Gram-GIT
55	0	0	1.77712e-11	0	0.5	0	0.264714	Au	MBC (uM)	162.464	Escherichia coli	MDR	Spherical	7	PDT	Single	Monomer	4	CJ	Gram-	GIT	0	1	1	0	t	0.447154	-0.002	0	0.122397	0.0791961	0.0807547	-0.142944	-0.119615	-0.149459	-0.133639	0.000813959	-0.000847443	196.967	10.2	2.54	6.1	3.2	24	SC1=NC(N)=CC(N)=N1	J. Am. Chem. Soc. 2013 135 (35) 12940â€“12943"	COMPLEMENTARY	AuSphericalSingleMonomerPDT	Gram-GIT
56	0	0	0.0110118	0	0.5	0	0.267954	Au	MBC (uM)	162.464	Pseudomonas aeruginosa	MDR	Spherical	7	PDT	Single	Monomer	10	HI	Gram-	SYS	0	1	1	0	t	0.447154	0.00357143	0.000571429	0.114325	0.0458025	0.0470383	-0.142944	-0.119615	-0.149459	-0.133639	0.000813959	-0.000847443	196.967	10.2	2.54	6.1	3.2	24	SC1=NC(N)=CC(N)=N1	J. Am. Chem. Soc. 2013 135 (35) 12940â€“12943"	COMPLEMENTARY	AuSphericalSingleMonomerPDT	Gram-SYS
56	1	1	0.697567	1	0.731059	0	0.270454	Au	MBC (uM)	162.464	Pseudomonas aeruginosa	MDR	Spherical	7	PDT	Single	Monomer	19	PA	Gram-	SYS	1	1	1	1	t	0.447154	0.00657143	0.00357143	0.102611	0.0205758	0.0222078	-0.142944	-0.119615	-0.149459	-0.133639	0.000813959	-0.000847443	196.967	10.2	2.54	6.1	3.2	24	SC1=NC(N)=CC(N)=N1	J. Am. Chem. Soc. 2013 135 (35) 12940â€“12943"	COMPLEMENTARY	AuSphericalSingleMonomerPDT	Gram-SYS
56	1	1	0.697567	1	0.731059	0	0.270454	Au	MBC (uM)	162.464	Pseudomonas aeruginosa	MDR	Spherical	7	PDT	Single	Monomer	19	PA	Gram-	SYS	1	1	1	1	t	0.447154	0.00657143	0.00357143	0.102611	0.0205758	0.0222078	-0.142944	-0.119615	-0.149459	-0.133639	0.000813959	-0.000847443	196.967	10.2	2.54	6.1	3.2	24	SC1=NC(N)=CC(N)=N1	J. Am. Chem. Soc. 2013 135 (35) 12940â€“12943"	COMPLEMENTARY	AuSphericalSingleMonomerPDT	Gram-SYS
56	0	0	0.0416181	0	0.5	0	0.266617	Au	MBC (uM)	162.464	Pseudomonas aeruginosa	MDR	Spherical	7	PDT	Single	Monomer	16	MT	Gram-	RES	0	1	1	0	t	0.447154	-0.009	-0.01	0.0993988	0.0302842	0.0319897	-0.142944	-0.119615	-0.149459	-0.133639	0.000813959	-0.000847443	196.967	10.2	2.54	6.1	3.2	24	SC1=NC(N)=CC(N)=N1	J. Am. Chem. Soc. 2013 135 (35) 12940â€“12943"	COMPLEMENTARY	AuSphericalSingleMonomerPDT	Gram-RES
56	0	0	0.143601	0	0.5	0	0.269829	Au	MBC (uM)	162.464	Pseudomonas aeruginosa	MDR	Spherical	7	PDT	Single	Monomer	25	TY	Gram+	SYS	0	1	1	0	t	0.447154	-0.0005	-0.0005	0.10259	0.0124517	0.0135345	-0.142944	-0.119615	-0.149459	-0.133639	0.000813959	-0.000847443	196.967	10.2	2.54	6.1	3.2	24	SC1=NC(N)=CC(N)=N1	J. Am. Chem. Soc. 2013 135 (35) 12940â€“12943"	COMPLEMENTARY	AuSphericalSingleMonomerPDT	Gram+SYS
56	0	0	1.77712e-11	0	0.5	0	0.264714	Au	MBC (uM)	162.464	Pseudomonas aeruginosa	MDR	Spherical	7	PDT	Single	Monomer	4	CJ	Gram-	GIT	0	1	1	0	t	0.447154	-0.002	0	0.122397	0.0791961	0.0807547	-0.142944	-0.119615	-0.149459	-0.133639	0.000813959	-0.000847443	196.967	10.2	2.54	6.1	3.2	24	SC1=NC(N)=CC(N)=N1	J. Am. Chem. Soc. 2013 135 (35) 12940â€“12943"	COMPLEMENTARY	AuSphericalSingleMonomerPDT	Gram-GIT
56	1	1	0.697567	1	0.731059	0	0.270454	Au	MBC (uM)	162.464	Pseudomonas aeruginosa	MDR	Spherical	7	PDT	Single	Monomer	19	PA	Gram-	SYS	1	1	1	1	t	0.447154	0.00657143	0.00357143	0.102611	0.0205758	0.0222078	-0.142944	-0.119615	-0.149459	-0.133639	0.000813959	-0.000847443	196.967	10.2	2.54	6.1	3.2	24	SC1=NC(N)=CC(N)=N1	J. Am. Chem. Soc. 2013 135 (35) 12940â€“12943"	COMPLEMENTARY	AuSphericalSingleMonomerPDT	Gram-SYS
56	1	1	0.697567	1	0.731059	0	0.270454	Au	MBC (uM)	162.464	Pseudomonas aeruginosa	MDR	Spherical	7	PDT	Single	Monomer	19	PA	Gram-	SYS	1	1	1	1	t	0.447154	0.00657143	0.00357143	0.102611	0.0205758	0.0222078	-0.142944	-0.119615	-0.149459	-0.133639	0.000813959	-0.000847443	196.967	10.2	2.54	6.1	3.2	24	SC1=NC(N)=CC(N)=N1	J. Am. Chem. Soc. 2013 135 (35) 12940â€“12943"	COMPLEMENTARY	AuSphericalSingleMonomerPDT	Gram-SYS
56	0	0	6.5636e-10	0	0.5	0	0.265747	Au	MBC (uM)	162.464	Pseudomonas aeruginosa	MDR	Spherical	7	PDT	Single	Monomer	24	ST	Gram+	RES	0	1	1	0	t	0.447154	0.00133333	0.00233333	0.124568	0.0735856	0.0748657	-0.142944	-0.119615	-0.149459	-0.133639	0.000813959	-0.000847443	196.967	10.2	2.54	6.1	3.2	24	SC1=NC(N)=CC(N)=N1	J. Am. Chem. Soc. 2013 135 (35) 12940â€“12943"	COMPLEMENTARY	AuSphericalSingleMonomerPDT	Gram+RES
56	0	0	9.6559e-06	0	0.5	0	0.267359	Au	MBC (uM)	162.464	Pseudomonas aeruginosa	MDR	Spherical	7	PDT	Single	Monomer	23	SC	Gram-	NO	0	0	1	0	t	0.447154	-0.0035	-0.0025	0.111339	0.0377349	0.0396256	-0.142944	-0.119615	-0.149459	-0.133639	0.000813959	-0.000847443	196.967	10.2	2.54	6.1	3.2	24	SC1=NC(N)=CC(N)=N1	J. Am. Chem. Soc. 2013 135 (35) 12940â€“12943"	COMPLEMENTARY	AuSphericalSingleMonomerPDT	Gram-NO
56	0	0	1.332e-11	0	0.5	0	0.264801	Au	MBC (uM)	162.464	Pseudomonas aeruginosa	MDR	Spherical	7	PDT	Single	Monomer	9	EF	Gram+	GIT	0	1	1	0	t	0.447154	-0.004	-0.001	0.122096	0.0733832	0.0748523	-0.142944	-0.119615	-0.149459	-0.133639	0.000813959	-0.000847443	196.967	10.2	2.54	6.1	3.2	24	SC1=NC(N)=CC(N)=N1	J. Am. Chem. Soc. 2013 135 (35) 12940â€“12943"	COMPLEMENTARY	AuSphericalSingleMonomerPDT	Gram+GIT
57	0	0	0.20864	0	0.5	0	0.270973	Au	MBC (uM)	162.464	Staphylococcus aureus	MET-R	Spherical	1	PDT/Mel	Double	Monomer	25	TY	Gram+	SYS	0	1	1	0	t	0.447154	-0.0005	-0.0005	0.10259	0.0124517	0.0135345	-0.144019	-0.119614	-0.149465	-0.0932798	-0.000401112	-0.000401112	196.967	10.2	2.54	6.1	1.8	24	SC1=NC(N)=CC(N)=N1.c1(nc(nc(n1)N)N)N	J. Am. Chem. Soc. 2013 135 (35) 12940â€“12943"	COMPLEMENTARY	AuSphericalDoubleMonomerPDT/Mel	Gram+SYS
57	0	0	0.0639148	0	0.5	0	0.267746	Au	MBC (uM)	162.464	Staphylococcus aureus	MET-R	Spherical	1	PDT/Mel	Double	Monomer	16	MT	Gram-	RES	0	1	1	0	t	0.447154	-0.009	-0.01	0.0993988	0.0302842	0.0319897	-0.144019	-0.119614	-0.149465	-0.0932798	-0.000401112	-0.000401112	196.967	10.2	2.54	6.1	1.8	24	SC1=NC(N)=CC(N)=N1.c1(nc(nc(n1)N)N)N	J. Am. Chem. Soc. 2013 135 (35) 12940â€“12943"	COMPLEMENTARY	AuSphericalDoubleMonomerPDT/Mel	Gram-RES
57	0	0	2.79421e-11	0	0.5	0	0.265817	Au	MBC (uM)	162.464	Staphylococcus aureus	MET-R	Spherical	1	PDT/Mel	Double	Monomer	4	CJ	Gram-	GIT	0	1	1	0	t	0.447154	-0.002	0	0.122397	0.0791961	0.0807547	-0.144019	-0.119614	-0.149465	-0.0932798	-0.000401112	-0.000401112	196.967	10.2	2.54	6.1	1.8	24	SC1=NC(N)=CC(N)=N1.c1(nc(nc(n1)N)N)N	J. Am. Chem. Soc. 2013 135 (35) 12940â€“12943"	COMPLEMENTARY	AuSphericalDoubleMonomerPDT/Mel	Gram-GIT
57	0	0	1.03201e-09	0	0.5	0	0.266856	Au	MBC (uM)	162.464	Staphylococcus aureus	MET-R	Spherical	1	PDT/Mel	Double	Monomer	24	ST	Gram+	RES	0	1	1	0	t	0.447154	0.00133333	0.00233333	0.124568	0.0735856	0.0748657	-0.144019	-0.119614	-0.149465	-0.0932798	-0.000401112	-0.000401112	196.967	10.2	2.54	6.1	1.8	24	SC1=NC(N)=CC(N)=N1.c1(nc(nc(n1)N)N)N	J. Am. Chem. Soc. 2013 135 (35) 12940â€“12943"	COMPLEMENTARY	AuSphericalDoubleMonomerPDT/Mel	Gram+RES
57	0	0	0.20864	0	0.5	0	0.270973	Au	MBC (uM)	162.464	Staphylococcus aureus	MET-R	Spherical	1	PDT/Mel	Double	Monomer	25	TY	Gram+	SYS	0	1	1	0	t	0.447154	-0.0005	-0.0005	0.10259	0.0124517	0.0135345	-0.144019	-0.119614	-0.149465	-0.0932798	-0.000401112	-0.000401112	196.967	10.2	2.54	6.1	1.8	24	SC1=NC(N)=CC(N)=N1.c1(nc(nc(n1)N)N)N	J. Am. Chem. Soc. 2013 135 (35) 12940â€“12943"	COMPLEMENTARY	AuSphericalDoubleMonomerPDT/Mel	Gram+SYS
57	0	0	0.0172057	0	0.5	0	0.269081	Au	MBC (uM)	162.464	Staphylococcus aureus	MET-R	Spherical	1	PDT/Mel	Double	Monomer	10	HI	Gram-	SYS	0	1	1	0	t	0.447154	0.00357143	0.000571429	0.114325	0.0458025	0.0470383	-0.144019	-0.119614	-0.149465	-0.0932798	-0.000401112	-0.000401112	196.967	10.2	2.54	6.1	1.8	24	SC1=NC(N)=CC(N)=N1.c1(nc(nc(n1)N)N)N	J. Am. Chem. Soc. 2013 135 (35) 12940â€“12943"	COMPLEMENTARY	AuSphericalDoubleMonomerPDT/Mel	Gram-SYS
57	0	0	2.09433e-11	0	0.5	0	0.265907	Au	MBC (uM)	162.464	Staphylococcus aureus	MET-R	Spherical	1	PDT/Mel	Double	Monomer	9	EF	Gram+	GIT	0	1	1	0	t	0.447154	-0.004	-0.001	0.122096	0.0733832	0.0748523	-0.144019	-0.119614	-0.149465	-0.0932798	-0.000401112	-0.000401112	196.967	10.2	2.54	6.1	1.8	24	SC1=NC(N)=CC(N)=N1.c1(nc(nc(n1)N)N)N	J. Am. Chem. Soc. 2013 135 (35) 12940â€“12943"	COMPLEMENTARY	AuSphericalDoubleMonomerPDT/Mel	Gram+GIT
57	0	0	9.7599e-15	0	0.5	0	0.2644	Au	MBC (uM)	162.464	Staphylococcus aureus	MET-R	Spherical	1	PDT/Mel	Double	Monomer	6	CT	Gram-	SYS	0	1	1	0	t	0.447154	0.00457143	0.00557143	0.129748	0.11685	0.11775	-0.144019	-0.119614	-0.149465	-0.0932798	-0.000401112	-0.000401112	196.967	10.2	2.54	6.1	1.8	24	SC1=NC(N)=CC(N)=N1.c1(nc(nc(n1)N)N)N	J. Am. Chem. Soc. 2013 135 (35) 12940â€“12943"	COMPLEMENTARY	AuSphericalDoubleMonomerPDT/Mel	Gram-SYS
58	1	1	0.740154	1	0.731059	0	0.271143	Au	MBC (uM)	162.464	Pseudomonas aeruginosa	ATCC27853	Spherical	2	PDT/ACh	Double	Monomer	19	PA	Gram-	SYS	1	1	1	1	t	0.447154	0.00657143	0.00357143	0.102611	0.0205758	0.0222078	-0.143756	-0.119614	-0.149464	-0.109213	-0.000459444	-0.000459444	196.967	10.2	2.54	6.1	2.2	24	SC1=NC(N)=CC(N)=N1.CC(=O)OCC[N+](C)(C)C	J. Am. Chem. Soc. 2013 135 (35) 12940â€“12943"	COMPLEMENTARY	AuSphericalDoubleMonomerPDT/ACh	Gram-SYS
58	1	1	0.740154	1	0.731059	0	0.271143	Au	MBC (uM)	162.464	Pseudomonas aeruginosa	ATCC27853	Spherical	2	PDT/ACh	Double	Monomer	19	PA	Gram-	SYS	1	1	1	1	t	0.447154	0.00657143	0.00357143	0.102611	0.0205758	0.0222078	-0.143756	-0.119614	-0.149464	-0.109213	-0.000459444	-0.000459444	196.967	10.2	2.54	6.1	2.2	24	SC1=NC(N)=CC(N)=N1.CC(=O)OCC[N+](C)(C)C	J. Am. Chem. Soc. 2013 135 (35) 12940â€“12943"	COMPLEMENTARY	AuSphericalDoubleMonomerPDT/ACh	Gram-SYS
58	1	1	0.740154	1	0.731059	0	0.271143	Au	MBC (uM)	162.464	Pseudomonas aeruginosa	ATCC27853	Spherical	2	PDT/ACh	Double	Monomer	19	PA	Gram-	SYS	1	1	1	1	t	0.447154	0.00657143	0.00357143	0.102611	0.0205758	0.0222078	-0.143756	-0.119614	-0.149464	-0.109213	-0.000459444	-0.000459444	196.967	10.2	2.54	6.1	2.2	24	SC1=NC(N)=CC(N)=N1.CC(=O)OCC[N+](C)(C)C	J. Am. Chem. Soc. 2013 135 (35) 12940â€“12943"	COMPLEMENTARY	AuSphericalDoubleMonomerPDT/ACh	Gram-SYS
58	1	1	0.740154	1	0.731059	0	0.271143	Au	MBC (uM)	162.464	Pseudomonas aeruginosa	ATCC27853	Spherical	2	PDT/ACh	Double	Monomer	19	PA	Gram-	SYS	1	1	1	1	t	0.447154	0.00657143	0.00357143	0.102611	0.0205758	0.0222078	-0.143756	-0.119614	-0.149464	-0.109213	-0.000459444	-0.000459444	196.967	10.2	2.54	6.1	2.2	24	SC1=NC(N)=CC(N)=N1.CC(=O)OCC[N+](C)(C)C	J. Am. Chem. Soc. 2013 135 (35) 12940â€“12943"	COMPLEMENTARY	AuSphericalDoubleMonomerPDT/ACh	Gram-SYS
58	0	0	0.171552	0	0.5	0	0.270518	Au	MBC (uM)	162.464	Pseudomonas aeruginosa	ATCC27853	Spherical	2	PDT/ACh	Double	Monomer	25	TY	Gram+	SYS	0	1	1	0	t	0.447154	-0.0005	-0.0005	0.10259	0.0124517	0.0135345	-0.143756	-0.119614	-0.149464	-0.109213	-0.000459444	-0.000459444	196.967	10.2	2.54	6.1	2.2	24	SC1=NC(N)=CC(N)=N1.CC(=O)OCC[N+](C)(C)C	J. Am. Chem. Soc. 2013 135 (35) 12940â€“12943"	COMPLEMENTARY	AuSphericalDoubleMonomerPDT/ACh	Gram+SYS
58	0	0	0.0508984	0	0.5	0	0.267296	Au	MBC (uM)	162.464	Pseudomonas aeruginosa	ATCC27853	Spherical	2	PDT/ACh	Double	Monomer	16	MT	Gram-	RES	0	1	1	0	t	0.447154	-0.009	-0.01	0.0993988	0.0302842	0.0319897	-0.143756	-0.119614	-0.149464	-0.109213	-0.000459444	-0.000459444	196.967	10.2	2.54	6.1	2.2	24	SC1=NC(N)=CC(N)=N1.CC(=O)OCC[N+](C)(C)C	J. Am. Chem. Soc. 2013 135 (35) 12940â€“12943"	COMPLEMENTARY	AuSphericalDoubleMonomerPDT/ACh	Gram-RES
58	0	0	2.19465e-11	0	0.5	0	0.265377	Au	MBC (uM)	162.464	Pseudomonas aeruginosa	ATCC27853	Spherical	2	PDT/ACh	Double	Monomer	4	CJ	Gram-	GIT	0	1	1	0	t	0.447154	-0.002	0	0.122397	0.0791961	0.0807547	-0.143756	-0.119614	-0.149464	-0.109213	-0.000459444	-0.000459444	196.967	10.2	2.54	6.1	2.2	24	SC1=NC(N)=CC(N)=N1.CC(=O)OCC[N+](C)(C)C	J. Am. Chem. Soc. 2013 135 (35) 12940â€“12943"	COMPLEMENTARY	AuSphericalDoubleMonomerPDT/ACh	Gram-GIT
58	0	0	1.64494e-11	0	0.5	0	0.265466	Au	MBC (uM)	162.464	Pseudomonas aeruginosa	ATCC27853	Spherical	2	PDT/ACh	Double	Monomer	9	EF	Gram+	GIT	0	1	1	0	t	0.447154	-0.004	-0.001	0.122096	0.0733832	0.0748523	-0.143756	-0.119614	-0.149464	-0.109213	-0.000459444	-0.000459444	196.967	10.2	2.54	6.1	2.2	24	SC1=NC(N)=CC(N)=N1.CC(=O)OCC[N+](C)(C)C	J. Am. Chem. Soc. 2013 135 (35) 12940â€“12943"	COMPLEMENTARY	AuSphericalDoubleMonomerPDT/ACh	Gram+GIT
58	0	0	8.1057e-10	0	0.5	0	0.266414	Au	MBC (uM)	162.464	Pseudomonas aeruginosa	ATCC27853	Spherical	2	PDT/ACh	Double	Monomer	24	ST	Gram+	RES	0	1	1	0	t	0.447154	0.00133333	0.00233333	0.124568	0.0735856	0.0748657	-0.143756	-0.119614	-0.149464	-0.109213	-0.000459444	-0.000459444	196.967	10.2	2.54	6.1	2.2	24	SC1=NC(N)=CC(N)=N1.CC(=O)OCC[N+](C)(C)C	J. Am. Chem. Soc. 2013 135 (35) 12940â€“12943"	COMPLEMENTARY	AuSphericalDoubleMonomerPDT/ACh	Gram+RES
58	0	0	0.0135639	0	0.5	0	0.268632	Au	MBC (uM)	162.464	Pseudomonas aeruginosa	ATCC27853	Spherical	2	PDT/ACh	Double	Monomer	10	HI	Gram-	SYS	0	1	1	0	t	0.447154	0.00357143	0.000571429	0.114325	0.0458025	0.0470383	-0.143756	-0.119614	-0.149464	-0.109213	-0.000459444	-0.000459444	196.967	10.2	2.54	6.1	2.2	24	SC1=NC(N)=CC(N)=N1.CC(=O)OCC[N+](C)(C)C	J. Am. Chem. Soc. 2013 135 (35) 12940â€“12943"	COMPLEMENTARY	AuSphericalDoubleMonomerPDT/ACh	Gram-SYS
58	0	0	7.66569e-15	0	0.5	0	0.263968	Au	MBC (uM)	162.464	Pseudomonas aeruginosa	ATCC27853	Spherical	2	PDT/ACh	Double	Monomer	6	CT	Gram-	SYS	0	1	1	0	t	0.447154	0.00457143	0.00557143	0.129748	0.11685	0.11775	-0.143756	-0.119614	-0.149464	-0.109213	-0.000459444	-0.000459444	196.967	10.2	2.54	6.1	2.2	24	SC1=NC(N)=CC(N)=N1.CC(=O)OCC[N+](C)(C)C	J. Am. Chem. Soc. 2013 135 (35) 12940â€“12943"	COMPLEMENTARY	AuSphericalDoubleMonomerPDT/ACh	Gram-SYS
58	0	0	1.19245e-05	0	0.5	0	0.268038	Au	MBC (uM)	162.464	Pseudomonas aeruginosa	ATCC27853	Spherical	2	PDT/ACh	Double	Monomer	23	SC	Gram-	NO	0	0	1	0	t	0.447154	-0.0035	-0.0025	0.111339	0.0377349	0.0396256	-0.143756	-0.119614	-0.149464	-0.109213	-0.000459444	-0.000459444	196.967	10.2	2.54	6.1	2.2	24	SC1=NC(N)=CC(N)=N1.CC(=O)OCC[N+](C)(C)C	J. Am. Chem. Soc. 2013 135 (35) 12940â€“12943"	COMPLEMENTARY	AuSphericalDoubleMonomerPDT/ACh	Gram-NO
59	0	0	0.0205968	0	0.5	0	0.268748	Au	MBC (uM)	162.464	Pseudomonas aeruginosa	MDR	Spherical	3	PDT/CQ	Double	Monomer	10	HI	Gram-	SYS	0	1	1	0	t	0.447154	0.00357143	0.000571429	0.114325	0.0458025	0.0470383	-0.142944	-0.119615	-0.149459	-0.105615	-0.000738822	-0.000738822	196.967	10.2	2.54	6.1	2.1	24	SC1=NC(N)=CC(N)=N1.Clc1cc2nccc(c2cc1)NC(C)CCCN(CC)CC	J. Am. Chem. Soc. 2013 135 (35) 12940â€“12943"	COMPLEMENTARY	AuSphericalDoubleMonomerPDT/CQ	Gram-SYS
59	1	1	0.813307	1	0.731059	0	0.271261	Au	MBC (uM)	162.464	Pseudomonas aeruginosa	MDR	Spherical	3	PDT/CQ	Double	Monomer	19	PA	Gram-	SYS	1	1	1	1	t	0.447154	0.00657143	0.00357143	0.102611	0.0205758	0.0222078	-0.142944	-0.119615	-0.149459	-0.105615	-0.000738822	-0.000738822	196.967	10.2	2.54	6.1	2.1	24	SC1=NC(N)=CC(N)=N1.Clc1cc2nccc(c2cc1)NC(C)CCCN(CC)CC	J. Am. Chem. Soc. 2013 135 (35) 12940â€“12943"	COMPLEMENTARY	AuSphericalDoubleMonomerPDT/CQ	Gram-SYS
59	1	1	0.813307	1	0.731059	0	0.271261	Au	MBC (uM)	162.464	Pseudomonas aeruginosa	MDR	Spherical	3	PDT/CQ	Double	Monomer	19	PA	Gram-	SYS	1	1	1	1	t	0.447154	0.00657143	0.00357143	0.102611	0.0205758	0.0222078	-0.142944	-0.119615	-0.149459	-0.105615	-0.000738822	-0.000738822	196.967	10.2	2.54	6.1	2.1	24	SC1=NC(N)=CC(N)=N1.Clc1cc2nccc(c2cc1)NC(C)CCCN(CC)CC	J. Am. Chem. Soc. 2013 135 (35) 12940â€“12943"	COMPLEMENTARY	AuSphericalDoubleMonomerPDT/CQ	Gram-SYS
59	0	0	3.3565e-11	0	0.5	0	0.265491	Au	MBC (uM)	162.464	Pseudomonas aeruginosa	MDR	Spherical	3	PDT/CQ	Double	Monomer	4	CJ	Gram-	GIT	0	1	1	0	t	0.447154	-0.002	0	0.122397	0.0791961	0.0807547	-0.142944	-0.119615	-0.149459	-0.105615	-0.000738822	-0.000738822	196.967	10.2	2.54	6.1	2.1	24	SC1=NC(N)=CC(N)=N1.Clc1cc2nccc(c2cc1)NC(C)CCCN(CC)CC	J. Am. Chem. Soc. 2013 135 (35) 12940â€“12943"	COMPLEMENTARY	AuSphericalDoubleMonomerPDT/CQ	Gram-GIT
59	1	1	0.813307	1	0.731059	0	0.271261	Au	MBC (uM)	162.464	Pseudomonas aeruginosa	MDR	Spherical	3	PDT/CQ	Double	Monomer	19	PA	Gram-	SYS	1	1	1	1	t	0.447154	0.00657143	0.00357143	0.102611	0.0205758	0.0222078	-0.142944	-0.119615	-0.149459	-0.105615	-0.000738822	-0.000738822	196.967	10.2	2.54	6.1	2.1	24	SC1=NC(N)=CC(N)=N1.Clc1cc2nccc(c2cc1)NC(C)CCCN(CC)CC	J. Am. Chem. Soc. 2013 135 (35) 12940â€“12943"	COMPLEMENTARY	AuSphericalDoubleMonomerPDT/CQ	Gram-SYS
59	0	0	0.240527	0	0.5	0	0.270636	Au	MBC (uM)	162.464	Pseudomonas aeruginosa	MDR	Spherical	3	PDT/CQ	Double	Monomer	25	TY	Gram+	SYS	0	1	1	0	t	0.447154	-0.0005	-0.0005	0.10259	0.0124517	0.0135345	-0.142944	-0.119615	-0.149459	-0.105615	-0.000738822	-0.000738822	196.967	10.2	2.54	6.1	2.1	24	SC1=NC(N)=CC(N)=N1.Clc1cc2nccc(c2cc1)NC(C)CCCN(CC)CC	J. Am. Chem. Soc. 2013 135 (35) 12940â€“12943"	COMPLEMENTARY	AuSphericalDoubleMonomerPDT/CQ	Gram+SYS
59	1	1	0.813307	1	0.731059	0	0.271261	Au	MBC (uM)	162.464	Pseudomonas aeruginosa	MDR	Spherical	3	PDT/CQ	Double	Monomer	19	PA	Gram-	SYS	1	1	1	1	t	0.447154	0.00657143	0.00357143	0.102611	0.0205758	0.0222078	-0.142944	-0.119615	-0.149459	-0.105615	-0.000738822	-0.000738822	196.967	10.2	2.54	6.1	2.1	24	SC1=NC(N)=CC(N)=N1.Clc1cc2nccc(c2cc1)NC(C)CCCN(CC)CC	J. Am. Chem. Soc. 2013 135 (35) 12940â€“12943"	COMPLEMENTARY	AuSphericalDoubleMonomerPDT/CQ	Gram-SYS
59	0	0	2.51578e-11	0	0.5	0	0.26558	Au	MBC (uM)	162.464	Pseudomonas aeruginosa	MDR	Spherical	3	PDT/CQ	Double	Monomer	9	EF	Gram+	GIT	0	1	1	0	t	0.447154	-0.004	-0.001	0.122096	0.0733832	0.0748523	-0.142944	-0.119615	-0.149459	-0.105615	-0.000738822	-0.000738822	196.967	10.2	2.54	6.1	2.1	24	SC1=NC(N)=CC(N)=N1.Clc1cc2nccc(c2cc1)NC(C)CCCN(CC)CC	J. Am. Chem. Soc. 2013 135 (35) 12940â€“12943"	COMPLEMENTARY	AuSphericalDoubleMonomerPDT/CQ	Gram+GIT
59	0	0	0.0758015	0	0.5	0	0.267413	Au	MBC (uM)	162.464	Pseudomonas aeruginosa	MDR	Spherical	3	PDT/CQ	Double	Monomer	16	MT	Gram-	RES	0	1	1	0	t	0.447154	-0.009	-0.01	0.0993988	0.0302842	0.0319897	-0.142944	-0.119615	-0.149459	-0.105615	-0.000738822	-0.000738822	196.967	10.2	2.54	6.1	2.1	24	SC1=NC(N)=CC(N)=N1.Clc1cc2nccc(c2cc1)NC(C)CCCN(CC)CC	J. Am. Chem. Soc. 2013 135 (35) 12940â€“12943"	COMPLEMENTARY	AuSphericalDoubleMonomerPDT/CQ	Gram-RES
59	0	0	1.23969e-09	0	0.5	0	0.266528	Au	MBC (uM)	162.464	Pseudomonas aeruginosa	MDR	Spherical	3	PDT/CQ	Double	Monomer	24	ST	Gram+	RES	0	1	1	0	t	0.447154	0.00133333	0.00233333	0.124568	0.0735856	0.0748657	-0.142944	-0.119615	-0.149459	-0.105615	-0.000738822	-0.000738822	196.967	10.2	2.54	6.1	2.1	24	SC1=NC(N)=CC(N)=N1.Clc1cc2nccc(c2cc1)NC(C)CCCN(CC)CC	J. Am. Chem. Soc. 2013 135 (35) 12940â€“12943"	COMPLEMENTARY	AuSphericalDoubleMonomerPDT/CQ	Gram+RES
59	0	0	1.82372e-05	0	0.5	0	0.268154	Au	MBC (uM)	162.464	Pseudomonas aeruginosa	MDR	Spherical	3	PDT/CQ	Double	Monomer	23	SC	Gram-	NO	0	0	1	0	t	0.447154	-0.0035	-0.0025	0.111339	0.0377349	0.0396256	-0.142944	-0.119615	-0.149459	-0.105615	-0.000738822	-0.000738822	196.967	10.2	2.54	6.1	2.1	24	SC1=NC(N)=CC(N)=N1.Clc1cc2nccc(c2cc1)NC(C)CCCN(CC)CC	J. Am. Chem. Soc. 2013 135 (35) 12940â€“12943"	COMPLEMENTARY	AuSphericalDoubleMonomerPDT/CQ	Gram-NO
59	0	0	1.17239e-14	0	0.5	0	0.26408	Au	MBC (uM)	162.464	Pseudomonas aeruginosa	MDR	Spherical	3	PDT/CQ	Double	Monomer	6	CT	Gram-	SYS	0	1	1	0	t	0.447154	0.00457143	0.00557143	0.129748	0.11685	0.11775	-0.142944	-0.119615	-0.149459	-0.105615	-0.000738822	-0.000738822	196.967	10.2	2.54	6.1	2.1	24	SC1=NC(N)=CC(N)=N1.Clc1cc2nccc(c2cc1)NC(C)CCCN(CC)CC	J. Am. Chem. Soc. 2013 135 (35) 12940â€“12943"	COMPLEMENTARY	AuSphericalDoubleMonomerPDT/CQ	Gram-SYS
59	0	0	0.0205968	0	0.5	0	0.268748	Au	MBC (uM)	162.464	Pseudomonas aeruginosa	MDR	Spherical	3	PDT/CQ	Double	Monomer	10	HI	Gram-	SYS	0	1	1	0	t	0.447154	0.00357143	0.000571429	0.114325	0.0458025	0.0470383	-0.142944	-0.119615	-0.149459	-0.105615	-0.000738822	-0.000738822	196.967	10.2	2.54	6.1	2.1	24	SC1=NC(N)=CC(N)=N1.Clc1cc2nccc(c2cc1)NC(C)CCCN(CC)CC	J. Am. Chem. Soc. 2013 135 (35) 12940â€“12943"	COMPLEMENTARY	AuSphericalDoubleMonomerPDT/CQ	Gram-SYS
60	0	0	3.35494e-11	0	0.5	0	0.265491	Au	MBC (uM)	162.464	Staphylococcus epidermidis	ATCC12228	Spherical	3	PDT/CQ	Double	Monomer	4	CJ	Gram-	GIT	0	1	1	0	t	0.447154	-0.002	0	0.122397	0.0791961	0.0807547	-0.142944	-0.119615	-0.149459	-0.105615	-0.00074392	-0.00074392	196.967	10.2	2.54	6.1	2.1	24	SC1=NC(N)=CC(N)=N1.Clc1cc2nccc(c2cc1)NC(C)CCCN(CC)CC	J. Am. Chem. Soc. 2013 135 (35) 12940â€“12943"	COMPLEMENTARY	AuSphericalDoubleMonomerPDT/CQ	Gram-GIT
60	0	0	0.075769	0	0.5	0	0.267413	Au	MBC (uM)	162.464	Staphylococcus epidermidis	ATCC12228	Spherical	3	PDT/CQ	Double	Monomer	16	MT	Gram-	RES	0	1	1	0	t	0.447154	-0.009	-0.01	0.0993988	0.0302842	0.0319897	-0.142944	-0.119615	-0.149459	-0.105615	-0.00074392	-0.00074392	196.967	10.2	2.54	6.1	2.1	24	SC1=NC(N)=CC(N)=N1.Clc1cc2nccc(c2cc1)NC(C)CCCN(CC)CC	J. Am. Chem. Soc. 2013 135 (35) 12940â€“12943"	COMPLEMENTARY	AuSphericalDoubleMonomerPDT/CQ	Gram-RES
60	0	0	0.240442	0	0.5	0	0.270636	Au	MBC (uM)	162.464	Staphylococcus epidermidis	ATCC12228	Spherical	3	PDT/CQ	Double	Monomer	25	TY	Gram+	SYS	0	1	1	0	t	0.447154	-0.0005	-0.0005	0.10259	0.0124517	0.0135345	-0.142944	-0.119615	-0.149459	-0.105615	-0.00074392	-0.00074392	196.967	10.2	2.54	6.1	2.1	24	SC1=NC(N)=CC(N)=N1.Clc1cc2nccc(c2cc1)NC(C)CCCN(CC)CC	J. Am. Chem. Soc. 2013 135 (35) 12940â€“12943"	COMPLEMENTARY	AuSphericalDoubleMonomerPDT/CQ	Gram+SYS
60	0	0	1.17185e-14	0	0.5	0	0.26408	Au	MBC (uM)	162.464	Staphylococcus epidermidis	ATCC12228	Spherical	3	PDT/CQ	Double	Monomer	6	CT	Gram-	SYS	0	1	1	0	t	0.447154	0.00457143	0.00557143	0.129748	0.11685	0.11775	-0.142944	-0.119615	-0.149459	-0.105615	-0.00074392	-0.00074392	196.967	10.2	2.54	6.1	2.1	24	SC1=NC(N)=CC(N)=N1.Clc1cc2nccc(c2cc1)NC(C)CCCN(CC)CC	J. Am. Chem. Soc. 2013 135 (35) 12940â€“12943"	COMPLEMENTARY	AuSphericalDoubleMonomerPDT/CQ	Gram-SYS
60	0	0	1.23911e-09	0	0.5	0	0.266528	Au	MBC (uM)	162.464	Staphylococcus epidermidis	ATCC12228	Spherical	3	PDT/CQ	Double	Monomer	24	ST	Gram+	RES	0	1	1	0	t	0.447154	0.00133333	0.00233333	0.124568	0.0735856	0.0748657	-0.142944	-0.119615	-0.149459	-0.105615	-0.00074392	-0.00074392	196.967	10.2	2.54	6.1	2.1	24	SC1=NC(N)=CC(N)=N1.Clc1cc2nccc(c2cc1)NC(C)CCCN(CC)CC	J. Am. Chem. Soc. 2013 135 (35) 12940â€“12943"	COMPLEMENTARY	AuSphericalDoubleMonomerPDT/CQ	Gram+RES
60	0	0	0.0205874	0	0.5	0	0.268748	Au	MBC (uM)	162.464	Staphylococcus epidermidis	ATCC12228	Spherical	3	PDT/CQ	Double	Monomer	10	HI	Gram-	SYS	0	1	1	0	t	0.447154	0.00357143	0.000571429	0.114325	0.0458025	0.0470383	-0.142944	-0.119615	-0.149459	-0.105615	-0.00074392	-0.00074392	196.967	10.2	2.54	6.1	2.1	24	SC1=NC(N)=CC(N)=N1.Clc1cc2nccc(c2cc1)NC(C)CCCN(CC)CC	J. Am. Chem. Soc. 2013 135 (35) 12940â€“12943"	COMPLEMENTARY	AuSphericalDoubleMonomerPDT/CQ	Gram-SYS
60	0	0	2.51461e-11	0	0.5	0	0.26558	Au	MBC (uM)	162.464	Staphylococcus epidermidis	ATCC12228	Spherical	3	PDT/CQ	Double	Monomer	9	EF	Gram+	GIT	0	1	1	0	t	0.447154	-0.004	-0.001	0.122096	0.0733832	0.0748523	-0.142944	-0.119615	-0.149459	-0.105615	-0.00074392	-0.00074392	196.967	10.2	2.54	6.1	2.1	24	SC1=NC(N)=CC(N)=N1.Clc1cc2nccc(c2cc1)NC(C)CCCN(CC)CC	J. Am. Chem. Soc. 2013 135 (35) 12940â€“12943"	COMPLEMENTARY	AuSphericalDoubleMonomerPDT/CQ	Gram+GIT
61	0	0	3.09492e-11	0	0.5	0	0.265391	Au	MBC (uM)	162.464	Staphylococcus epidermidis	ATCC12228	Spherical	5	PDT/CPB	Double	Monomer	4	CJ	Gram-	GIT	0	1	1	0	t	0.447154	-0.002	0	0.122397	0.0791961	0.0807547	-0.142944	-0.119615	-0.149459	-0.109226	-0.00074392	-0.00074392	196.967	10.2	2.54	6.1	2.2	24	SC1=NC(N)=CC(N)=N1.N=C(NC(N)=N)NC1=CC(Cl)=CC=C1	J. Am. Chem. Soc. 2013 135 (35) 12940â€“12943"	COMPLEMENTARY	AuSphericalDoubleMonomerPDT/CPB	Gram-GIT
61	0	0	0.226019	0	0.5	0	0.270531	Au	MBC (uM)	162.464	Staphylococcus epidermidis	ATCC12228	Spherical	5	PDT/CPB	Double	Monomer	25	TY	Gram+	SYS	0	1	1	0	t	0.447154	-0.0005	-0.0005	0.10259	0.0124517	0.0135345	-0.142944	-0.119615	-0.149459	-0.109226	-0.00074392	-0.00074392	196.967	10.2	2.54	6.1	2.2	24	SC1=NC(N)=CC(N)=N1.N=C(NC(N)=N)NC1=CC(Cl)=CC=C1	J. Am. Chem. Soc. 2013 135 (35) 12940â€“12943"	COMPLEMENTARY	AuSphericalDoubleMonomerPDT/CPB	Gram+SYS
61	0	0	0.0703096	0	0.5	0	0.26731	Au	MBC (uM)	162.464	Staphylococcus epidermidis	ATCC12228	Spherical	5	PDT/CPB	Double	Monomer	16	MT	Gram-	RES	0	1	1	0	t	0.447154	-0.009	-0.01	0.0993988	0.0302842	0.0319897	-0.142944	-0.119615	-0.149459	-0.109226	-0.00074392	-0.00074392	196.967	10.2	2.54	6.1	2.2	24	SC1=NC(N)=CC(N)=N1.N=C(NC(N)=N)NC1=CC(Cl)=CC=C1	J. Am. Chem. Soc. 2013 135 (35) 12940â€“12943"	COMPLEMENTARY	AuSphericalDoubleMonomerPDT/CPB	Gram-RES
61	0	0	0.226019	0	0.5	0	0.270531	Au	MBC (uM)	162.464	Staphylococcus epidermidis	ATCC12228	Spherical	5	PDT/CPB	Double	Monomer	25	TY	Gram+	SYS	0	1	1	0	t	0.447154	-0.0005	-0.0005	0.10259	0.0124517	0.0135345	-0.142944	-0.119615	-0.149459	-0.109226	-0.00074392	-0.00074392	196.967	10.2	2.54	6.1	2.2	24	SC1=NC(N)=CC(N)=N1.N=C(NC(N)=N)NC1=CC(Cl)=CC=C1	J. Am. Chem. Soc. 2013 135 (35) 12940â€“12943"	COMPLEMENTARY	AuSphericalDoubleMonomerPDT/CPB	Gram+SYS
61	0	0	2.31972e-11	0	0.5	0	0.265479	Au	MBC (uM)	162.464	Staphylococcus epidermidis	ATCC12228	Spherical	5	PDT/CPB	Double	Monomer	9	EF	Gram+	GIT	0	1	1	0	t	0.447154	-0.004	-0.001	0.122096	0.0733832	0.0748523	-0.142944	-0.119615	-0.149459	-0.109226	-0.00074392	-0.00074392	196.967	10.2	2.54	6.1	2.2	24	SC1=NC(N)=CC(N)=N1.N=C(NC(N)=N)NC1=CC(Cl)=CC=C1	J. Am. Chem. Soc. 2013 135 (35) 12940â€“12943"	COMPLEMENTARY	AuSphericalDoubleMonomerPDT/CPB	Gram+GIT
61	0	0	1.08102e-14	0	0.5	0	0.263982	Au	MBC (uM)	162.464	Staphylococcus epidermidis	ATCC12228	Spherical	5	PDT/CPB	Double	Monomer	6	CT	Gram-	SYS	0	1	1	0	t	0.447154	0.00457143	0.00557143	0.129748	0.11685	0.11775	-0.142944	-0.119615	-0.149459	-0.109226	-0.00074392	-0.00074392	196.967	10.2	2.54	6.1	2.2	24	SC1=NC(N)=CC(N)=N1.N=C(NC(N)=N)NC1=CC(Cl)=CC=C1	J. Am. Chem. Soc. 2013 135 (35) 12940â€“12943"	COMPLEMENTARY	AuSphericalDoubleMonomerPDT/CPB	Gram-SYS
61	0	0	1.14308e-09	0	0.5	0	0.266427	Au	MBC (uM)	162.464	Staphylococcus epidermidis	ATCC12228	Spherical	5	PDT/CPB	Double	Monomer	24	ST	Gram+	RES	0	1	1	0	t	0.447154	0.00133333	0.00233333	0.124568	0.0735856	0.0748657	-0.142944	-0.119615	-0.149459	-0.109226	-0.00074392	-0.00074392	196.967	10.2	2.54	6.1	2.2	24	SC1=NC(N)=CC(N)=N1.N=C(NC(N)=N)NC1=CC(Cl)=CC=C1	J. Am. Chem. Soc. 2013 135 (35) 12940â€“12943"	COMPLEMENTARY	AuSphericalDoubleMonomerPDT/CPB	Gram+RES
61	0	0	0.0190222	0	0.5	0	0.268646	Au	MBC (uM)	162.464	Staphylococcus epidermidis	ATCC12228	Spherical	5	PDT/CPB	Double	Monomer	10	HI	Gram-	SYS	0	1	1	0	t	0.447154	0.00357143	0.000571429	0.114325	0.0458025	0.0470383	-0.142944	-0.119615	-0.149459	-0.109226	-0.00074392	-0.00074392	196.967	10.2	2.54	6.1	2.2	24	SC1=NC(N)=CC(N)=N1.N=C(NC(N)=N)NC1=CC(Cl)=CC=C1	J. Am. Chem. Soc. 2013 135 (35) 12940â€“12943"	COMPLEMENTARY	AuSphericalDoubleMonomerPDT/CPB	Gram-SYS
62	0	0	0.256527	0	0.5	0	0.270747	Au	MBC (uM)	162.464	Staphylococcus epidermidis	ATCC12228	Spherical	6	PDT/G	Double	Monomer	25	TY	Gram+	SYS	0	1	1	0	t	0.447154	-0.0005	-0.0005	0.10259	0.0124517	0.0135345	-0.142944	-0.119615	-0.149459	-0.101758	-0.00074392	-0.00074392	196.967	10.2	2.54	6.1	2	24	SC1=NC(N)=CC(N)=N1.NC(N)=N	J. Am. Chem. Soc. 2013 135 (35) 12940â€“12943"	COMPLEMENTARY	AuSphericalDoubleMonomerPDT/G	Gram+SYS
62	0	0	0.0820274	0	0.5	0	0.267523	Au	MBC (uM)	162.464	Staphylococcus epidermidis	ATCC12228	Spherical	6	PDT/G	Double	Monomer	16	MT	Gram-	RES	0	1	1	0	t	0.447154	-0.009	-0.01	0.0993988	0.0302842	0.0319897	-0.142944	-0.119615	-0.149459	-0.101758	-0.00074392	-0.00074392	196.967	10.2	2.54	6.1	2	24	SC1=NC(N)=CC(N)=N1.NC(N)=N	J. Am. Chem. Soc. 2013 135 (35) 12940â€“12943"	COMPLEMENTARY	AuSphericalDoubleMonomerPDT/G	Gram-RES
62	0	0	0.256527	0	0.5	0	0.270747	Au	MBC (uM)	162.464	Staphylococcus epidermidis	ATCC12228	Spherical	6	PDT/G	Double	Monomer	25	TY	Gram+	SYS	0	1	1	0	t	0.447154	-0.0005	-0.0005	0.10259	0.0124517	0.0135345	-0.142944	-0.119615	-0.149459	-0.101758	-0.00074392	-0.00074392	196.967	10.2	2.54	6.1	2	24	SC1=NC(N)=CC(N)=N1.NC(N)=N	J. Am. Chem. Soc. 2013 135 (35) 12940â€“12943"	COMPLEMENTARY	AuSphericalDoubleMonomerPDT/G	Gram+SYS
62	0	0	2.74087e-11	0	0.5	0	0.265688	Au	MBC (uM)	162.464	Staphylococcus epidermidis	ATCC12228	Spherical	6	PDT/G	Double	Monomer	9	EF	Gram+	GIT	0	1	1	0	t	0.447154	-0.004	-0.001	0.122096	0.0733832	0.0748523	-0.142944	-0.119615	-0.149459	-0.101758	-0.00074392	-0.00074392	196.967	10.2	2.54	6.1	2	24	SC1=NC(N)=CC(N)=N1.NC(N)=N	J. Am. Chem. Soc. 2013 135 (35) 12940â€“12943"	COMPLEMENTARY	AuSphericalDoubleMonomerPDT/G	Gram+GIT
62	0	0	1.3506e-09	0	0.5	0	0.266636	Au	MBC (uM)	162.464	Staphylococcus epidermidis	ATCC12228	Spherical	6	PDT/G	Double	Monomer	24	ST	Gram+	RES	0	1	1	0	t	0.447154	0.00133333	0.00233333	0.124568	0.0735856	0.0748657	-0.142944	-0.119615	-0.149459	-0.101758	-0.00074392	-0.00074392	196.967	10.2	2.54	6.1	2	24	SC1=NC(N)=CC(N)=N1.NC(N)=N	J. Am. Chem. Soc. 2013 135 (35) 12940â€“12943"	COMPLEMENTARY	AuSphericalDoubleMonomerPDT/G	Gram+RES
62	0	0	3.65682e-11	0	0.5	0	0.265599	Au	MBC (uM)	162.464	Staphylococcus epidermidis	ATCC12228	Spherical	6	PDT/G	Double	Monomer	4	CJ	Gram-	GIT	0	1	1	0	t	0.447154	-0.002	0	0.122397	0.0791961	0.0807547	-0.142944	-0.119615	-0.149459	-0.101758	-0.00074392	-0.00074392	196.967	10.2	2.54	6.1	2	24	SC1=NC(N)=CC(N)=N1.NC(N)=N	J. Am. Chem. Soc. 2013 135 (35) 12940â€“12943"	COMPLEMENTARY	AuSphericalDoubleMonomerPDT/G	Gram-GIT
62	0	0	0.0223983	0	0.5	0	0.268858	Au	MBC (uM)	162.464	Staphylococcus epidermidis	ATCC12228	Spherical	6	PDT/G	Double	Monomer	10	HI	Gram-	SYS	0	1	1	0	t	0.447154	0.00357143	0.000571429	0.114325	0.0458025	0.0470383	-0.142944	-0.119615	-0.149459	-0.101758	-0.00074392	-0.00074392	196.967	10.2	2.54	6.1	2	24	SC1=NC(N)=CC(N)=N1.NC(N)=N	J. Am. Chem. Soc. 2013 135 (35) 12940â€“12943"	COMPLEMENTARY	AuSphericalDoubleMonomerPDT/G	Gram-SYS
62	0	0	1.27729e-14	0	0.5	0	0.264186	Au	MBC (uM)	162.464	Staphylococcus epidermidis	ATCC12228	Spherical	6	PDT/G	Double	Monomer	6	CT	Gram-	SYS	0	1	1	0	t	0.447154	0.00457143	0.00557143	0.129748	0.11685	0.11775	-0.142944	-0.119615	-0.149459	-0.101758	-0.00074392	-0.00074392	196.967	10.2	2.54	6.1	2	24	SC1=NC(N)=CC(N)=N1.NC(N)=N	J. Am. Chem. Soc. 2013 135 (35) 12940â€“12943"	COMPLEMENTARY	AuSphericalDoubleMonomerPDT/G	Gram-SYS
63	1	0	0.183412	1	0.731059	0	0.269899	ZnO	MBC (uM)	171.973	Pseudomonas aeruginosa	MD	N/A	16	N/A	None	None	19	PA	Gram-	SYS	1	1	1	1	t	0.447154	0.00657143	0.00357143	0.102611	0.0205758	0.0222078	-0.147399	-0.119733	-0.138991	-0.15039	-3.11552e-05	-3.11552e-05	81.408	11.6	2.545	3.5965	18	24		Int. J. Nanomedicine 2012 7 6003-6009"	COMPLEMENTARY	ZnON/ANoneNoneN/A	Gram-SYS
63	1	0	0.183412	1	0.731059	0	0.269899	ZnO	MBC (uM)	171.973	Pseudomonas aeruginosa	MD	N/A	16	N/A	None	None	19	PA	Gram-	SYS	1	1	1	1	t	0.447154	0.00657143	0.00357143	0.102611	0.0205758	0.0222078	-0.147399	-0.119733	-0.138991	-0.15039	-3.11552e-05	-3.11552e-05	81.408	11.6	2.545	3.5965	18	24		Int. J. Nanomedicine 2012 7 6003-6009"	COMPLEMENTARY	ZnON/ANoneNoneN/A	Gram-SYS
63	0	0	0.00421092	0	0.5	0	0.26607	ZnO	MBC (uM)	171.973	Pseudomonas aeruginosa	MD	N/A	16	N/A	None	None	16	MT	Gram-	RES	0	1	1	0	t	0.447154	-0.009	-0.01	0.0993988	0.0302842	0.0319897	-0.147399	-0.119733	-0.138991	-0.15039	-3.11552e-05	-3.11552e-05	81.408	11.6	2.545	3.5965	18	24		Int. J. Nanomedicine 2012 7 6003-6009"	COMPLEMENTARY	ZnON/ANoneNoneN/A	Gram-RES
63	0	0	1.73055e-12	0	0.5	0	0.264179	ZnO	MBC (uM)	171.973	Pseudomonas aeruginosa	MD	N/A	16	N/A	None	None	4	CJ	Gram-	GIT	0	1	1	0	t	0.447154	-0.002	0	0.122397	0.0791961	0.0807547	-0.147399	-0.119733	-0.138991	-0.15039	-3.11552e-05	-3.11552e-05	81.408	11.6	2.545	3.5965	18	24		Int. J. Nanomedicine 2012 7 6003-6009"	COMPLEMENTARY	ZnON/ANoneNoneN/A	Gram-GIT
63	0	0	0.0160663	0	0.5	0	0.269273	ZnO	MBC (uM)	171.973	Pseudomonas aeruginosa	MD	N/A	16	N/A	None	None	25	TY	Gram+	SYS	0	1	1	0	t	0.447154	-0.0005	-0.0005	0.10259	0.0124517	0.0135345	-0.147399	-0.119733	-0.138991	-0.15039	-3.11552e-05	-3.11552e-05	81.408	11.6	2.545	3.5965	18	24		Int. J. Nanomedicine 2012 7 6003-6009"	COMPLEMENTARY	ZnON/ANoneNoneN/A	Gram+SYS
63	1	0	0.183412	1	0.731059	0	0.269899	ZnO	MBC (uM)	171.973	Pseudomonas aeruginosa	MD	N/A	16	N/A	None	None	19	PA	Gram-	SYS	1	1	1	1	t	0.447154	0.00657143	0.00357143	0.102611	0.0205758	0.0222078	-0.147399	-0.119733	-0.138991	-0.15039	-3.11552e-05	-3.11552e-05	81.408	11.6	2.545	3.5965	18	24		Int. J. Nanomedicine 2012 7 6003-6009"	COMPLEMENTARY	ZnON/ANoneNoneN/A	Gram-SYS
63	0	0	0.00108309	0	0.5	0	0.267407	ZnO	MBC (uM)	171.973	Pseudomonas aeruginosa	MD	N/A	16	N/A	None	None	10	HI	Gram-	SYS	0	1	1	0	t	0.447154	0.00357143	0.000571429	0.114325	0.0458025	0.0470383	-0.147399	-0.119733	-0.138991	-0.15039	-3.11552e-05	-3.11552e-05	81.408	11.6	2.545	3.5965	18	24		Int. J. Nanomedicine 2012 7 6003-6009"	COMPLEMENTARY	ZnON/ANoneNoneN/A	Gram-SYS
63	1	0	0.183412	1	0.731059	0	0.269899	ZnO	MBC (uM)	171.973	Pseudomonas aeruginosa	MD	N/A	16	N/A	None	None	19	PA	Gram-	SYS	1	1	1	1	t	0.447154	0.00657143	0.00357143	0.102611	0.0205758	0.0222078	-0.147399	-0.119733	-0.138991	-0.15039	-3.11552e-05	-3.11552e-05	81.408	11.6	2.545	3.5965	18	24		Int. J. Nanomedicine 2012 7 6003-6009"	COMPLEMENTARY	ZnON/ANoneNoneN/A	Gram-SYS
63	0	0	1.29709e-12	0	0.5	0	0.264265	ZnO	MBC (uM)	171.973	Pseudomonas aeruginosa	MD	N/A	16	N/A	None	None	9	EF	Gram+	GIT	0	1	1	0	t	0.447154	-0.004	-0.001	0.122096	0.0733832	0.0748523	-0.147399	-0.119733	-0.138991	-0.15039	-3.11552e-05	-3.11552e-05	81.408	11.6	2.545	3.5965	18	24		Int. J. Nanomedicine 2012 7 6003-6009"	COMPLEMENTARY	ZnON/ANoneNoneN/A	Gram+GIT
63	0	0	6.39159e-11	0	0.5	0	0.265209	ZnO	MBC (uM)	171.973	Pseudomonas aeruginosa	MD	N/A	16	N/A	None	None	24	ST	Gram+	RES	0	1	1	0	t	0.447154	0.00133333	0.00233333	0.124568	0.0735856	0.0748657	-0.147399	-0.119733	-0.138991	-0.15039	-3.11552e-05	-3.11552e-05	81.408	11.6	2.545	3.5965	18	24		Int. J. Nanomedicine 2012 7 6003-6009"	COMPLEMENTARY	ZnON/ANoneNoneN/A	Gram+RES
63	0	0	6.04463e-16	0	0.5	0	0.262795	ZnO	MBC (uM)	171.973	Pseudomonas aeruginosa	MD	N/A	16	N/A	None	None	6	CT	Gram-	SYS	0	1	1	0	t	0.447154	0.00457143	0.00557143	0.129748	0.11685	0.11775	-0.147399	-0.119733	-0.138991	-0.15039	-3.11552e-05	-3.11552e-05	81.408	11.6	2.545	3.5965	18	24		Int. J. Nanomedicine 2012 7 6003-6009"	COMPLEMENTARY	ZnON/ANoneNoneN/A	Gram-SYS
64	1	0	0.172881	1	0.731059	0	0.269326	CdS	MBC (uM)	173.034	Escherichia coli	K-12	Spherical	16	N/A	None	None	8	EC	Gram-	GIT	1	1	1	1	t	0.447154	-0.004	-0.004	0.100485	0.00996768	0.0108964	-0.146467	-0.10673	-0.147686	-0.130217	-0.000498218	-0.000498218	144.48	14.3	2.135	5.05	3	24		J. Hazard. Mater. 2013 260 1073-1082"	COMPLEMENTARY	CdSSphericalNoneNoneN/A	Gram-GIT
64	1	0	0.172881	1	0.731059	0	0.269326	CdS	MBC (uM)	173.034	Escherichia coli	K-12	Spherical	16	N/A	None	None	8	EC	Gram-	GIT	1	1	1	1	t	0.447154	-0.004	-0.004	0.100485	0.00996768	0.0108964	-0.146467	-0.10673	-0.147686	-0.130217	-0.000498218	-0.000498218	144.48	14.3	2.135	5.05	3	24		J. Hazard. Mater. 2013 260 1073-1082"	COMPLEMENTARY	CdSSphericalNoneNoneN/A	Gram-GIT
64	0	0	1.15382e-12	0	0.5	0	0.265629	CdS	MBC (uM)	173.034	Escherichia coli	K-12	Spherical	16	N/A	None	None	21	PN	Gram+	RES	0	1	1	0	t	0.447154	-0.000666667	0.00233333	0.123904	0.0718737	0.0736966	-0.146467	-0.10673	-0.147686	-0.130217	-0.000498218	-0.000498218	144.48	14.3	2.135	5.05	3	24		J. Hazard. Mater. 2013 260 1073-1082"	COMPLEMENTARY	CdSSphericalNoneNoneN/A	Gram+RES
64	0	0	1.4697e-10	0	0.5	0	0.265785	CdS	MBC (uM)	173.034	Escherichia coli	K-12	Spherical	16	N/A	None	None	24	ST	Gram+	RES	0	1	1	0	t	0.447154	0.00133333	0.00233333	0.124568	0.0735856	0.0748657	-0.146467	-0.10673	-0.147686	-0.130217	-0.000498218	-0.000498218	144.48	14.3	2.135	5.05	3	24		J. Hazard. Mater. 2013 260 1073-1082"	COMPLEMENTARY	CdSSphericalNoneNoneN/A	Gram+RES
64	0	0	0.0361876	0	0.5	0	0.269869	CdS	MBC (uM)	173.034	Escherichia coli	K-12	Spherical	16	N/A	None	None	25	TY	Gram+	SYS	0	1	1	0	t	0.447154	-0.0005	-0.0005	0.10259	0.0124517	0.0135345	-0.146467	-0.10673	-0.147686	-0.130217	-0.000498218	-0.000498218	144.48	14.3	2.135	5.05	3	24		J. Hazard. Mater. 2013 260 1073-1082"	COMPLEMENTARY	CdSSphericalNoneNoneN/A	Gram+SYS
64	0	0	1.15382e-12	0	0.5	0	0.265629	CdS	MBC (uM)	173.034	Escherichia coli	K-12	Spherical	16	N/A	None	None	21	PN	Gram+	RES	0	1	1	0	t	0.447154	-0.000666667	0.00233333	0.123904	0.0718737	0.0736966	-0.146467	-0.10673	-0.147686	-0.130217	-0.000498218	-0.000498218	144.48	14.3	2.135	5.05	3	24		J. Hazard. Mater. 2013 260 1073-1082"	COMPLEMENTARY	CdSSphericalNoneNoneN/A	Gram+RES
64	0	0	1.4697e-10	0	0.5	0	0.265785	CdS	MBC (uM)	173.034	Escherichia coli	K-12	Spherical	16	N/A	None	None	24	ST	Gram+	RES	0	1	1	0	t	0.447154	0.00133333	0.00233333	0.124568	0.0735856	0.0748657	-0.146467	-0.10673	-0.147686	-0.130217	-0.000498218	-0.000498218	144.48	14.3	2.135	5.05	3	24		J. Hazard. Mater. 2013 260 1073-1082"	COMPLEMENTARY	CdSSphericalNoneNoneN/A	Gram+RES
64	0	0	6.39479e-13	0	0.5	0	0.264546	CdS	MBC (uM)	173.034	Escherichia coli	K-12	Spherical	16	N/A	None	None	20	PG	Gram-	SYS	0	1	1	0	t	0.447154	-0.00442857	-0.00142857	0.11973	0.0759019	0.0779623	-0.146467	-0.10673	-0.147686	-0.130217	-0.000498218	-0.000498218	144.48	14.3	2.135	5.05	3	24		J. Hazard. Mater. 2013 260 1073-1082"	COMPLEMENTARY	CdSSphericalNoneNoneN/A	Gram-SYS
64	1	0	0.172881	1	0.731059	0	0.269326	CdS	MBC (uM)	173.034	Escherichia coli	K-12	Spherical	16	N/A	None	None	8	EC	Gram-	GIT	1	1	1	1	t	0.447154	-0.004	-0.004	0.100485	0.00996768	0.0108964	-0.146467	-0.10673	-0.147686	-0.130217	-0.000498218	-0.000498218	144.48	14.3	2.135	5.05	3	24		J. Hazard. Mater. 2013 260 1073-1082"	COMPLEMENTARY	CdSSphericalNoneNoneN/A	Gram-GIT
64	0	0	0.00963	0	0.5	0	0.266656	CdS	MBC (uM)	173.034	Escherichia coli	K-12	Spherical	16	N/A	None	None	16	MT	Gram-	RES	0	1	1	0	t	0.447154	-0.009	-0.01	0.0993988	0.0302842	0.0319897	-0.146467	-0.10673	-0.147686	-0.130217	-0.000498218	-0.000498218	144.48	14.3	2.135	5.05	3	24		J. Hazard. Mater. 2013 260 1073-1082"	COMPLEMENTARY	CdSSphericalNoneNoneN/A	Gram-RES
64	1	0	0.172881	1	0.731059	0	0.269326	CdS	MBC (uM)	173.034	Escherichia coli	K-12	Spherical	16	N/A	None	None	8	EC	Gram-	GIT	1	1	1	1	t	0.447154	-0.004	-0.004	0.100485	0.00996768	0.0108964	-0.146467	-0.10673	-0.147686	-0.130217	-0.000498218	-0.000498218	144.48	14.3	2.135	5.05	3	24		J. Hazard. Mater. 2013 260 1073-1082"	COMPLEMENTARY	CdSSphericalNoneNoneN/A	Gram-GIT
64	0	0	3.97926e-12	0	0.5	0	0.264751	CdS	MBC (uM)	173.034	Escherichia coli	K-12	Spherical	16	N/A	None	None	4	CJ	Gram-	GIT	0	1	1	0	t	0.447154	-0.002	0	0.122397	0.0791961	0.0807547	-0.146467	-0.10673	-0.147686	-0.130217	-0.000498218	-0.000498218	144.48	14.3	2.135	5.05	3	24		J. Hazard. Mater. 2013 260 1073-1082"	COMPLEMENTARY	CdSSphericalNoneNoneN/A	Gram-GIT
64	0	0	0.00248698	0	0.5	0	0.267993	CdS	MBC (uM)	173.034	Escherichia coli	K-12	Spherical	16	N/A	None	None	10	HI	Gram-	SYS	0	1	1	0	t	0.447154	0.00357143	0.000571429	0.114325	0.0458025	0.0470383	-0.146467	-0.10673	-0.147686	-0.130217	-0.000498218	-0.000498218	144.48	14.3	2.135	5.05	3	24		J. Hazard. Mater. 2013 260 1073-1082"	COMPLEMENTARY	CdSSphericalNoneNoneN/A	Gram-SYS
64	0	0	0.0361876	0	0.5	0	0.269869	CdS	MBC (uM)	173.034	Escherichia coli	K-12	Spherical	16	N/A	None	None	25	TY	Gram+	SYS	0	1	1	0	t	0.447154	-0.0005	-0.0005	0.10259	0.0124517	0.0135345	-0.146467	-0.10673	-0.147686	-0.130217	-0.000498218	-0.000498218	144.48	14.3	2.135	5.05	3	24		J. Hazard. Mater. 2013 260 1073-1082"	COMPLEMENTARY	CdSSphericalNoneNoneN/A	Gram+SYS
64	0	0	1.38992e-15	0	0.5	0	0.263355	CdS	MBC (uM)	173.034	Escherichia coli	K-12	Spherical	16	N/A	None	None	6	CT	Gram-	SYS	0	1	1	0	t	0.447154	0.00457143	0.00557143	0.129748	0.11685	0.11775	-0.146467	-0.10673	-0.147686	-0.130217	-0.000498218	-0.000498218	144.48	14.3	2.135	5.05	3	24		J. Hazard. Mater. 2013 260 1073-1082"	COMPLEMENTARY	CdSSphericalNoneNoneN/A	Gram-SYS
65	0	0	0.00108309	0	0.5	0	0.267407	ZnO	MBC (uM)	196.541	Staphylococcus aureus	MD	N/A	16	N/A	None	None	10	HI	Gram-	SYS	0	1	0	0	t	0.447154	0.00357143	0.000571429	0.114325	0.0458025	0.0470383	-0.147399	-0.119733	-0.138991	-0.15039	-3.11552e-05	-3.11552e-05	81.408	11.6	2.545	3.5965	18	24		Int. J. Nanomedicine 2012 7 6003-6009"	COMPLEMENTARY	ZnON/ANoneNoneN/A	Gram-SYS
65	0	0	0.00421092	0	0.5	0	0.26607	ZnO	MBC (uM)	196.541	Staphylococcus aureus	MD	N/A	16	N/A	None	None	16	MT	Gram-	RES	0	1	0	0	t	0.447154	-0.009	-0.01	0.0993988	0.0302842	0.0319897	-0.147399	-0.119733	-0.138991	-0.15039	-3.11552e-05	-3.11552e-05	81.408	11.6	2.545	3.5965	18	24		Int. J. Nanomedicine 2012 7 6003-6009"	COMPLEMENTARY	ZnON/ANoneNoneN/A	Gram-RES
65	0	0	0.0160663	0	0.5	0	0.269273	ZnO	MBC (uM)	196.541	Staphylococcus aureus	MD	N/A	16	N/A	None	None	25	TY	Gram+	SYS	0	1	0	0	t	0.447154	-0.0005	-0.0005	0.10259	0.0124517	0.0135345	-0.147399	-0.119733	-0.138991	-0.15039	-3.11552e-05	-3.11552e-05	81.408	11.6	2.545	3.5965	18	24		Int. J. Nanomedicine 2012 7 6003-6009"	COMPLEMENTARY	ZnON/ANoneNoneN/A	Gram+SYS
65	0	0	1.73055e-12	0	0.5	0	0.264179	ZnO	MBC (uM)	196.541	Staphylococcus aureus	MD	N/A	16	N/A	None	None	4	CJ	Gram-	GIT	0	1	0	0	t	0.447154	-0.002	0	0.122397	0.0791961	0.0807547	-0.147399	-0.119733	-0.138991	-0.15039	-3.11552e-05	-3.11552e-05	81.408	11.6	2.545	3.5965	18	24		Int. J. Nanomedicine 2012 7 6003-6009"	COMPLEMENTARY	ZnON/ANoneNoneN/A	Gram-GIT
65	0	0	1.29709e-12	0	0.5	0	0.264265	ZnO	MBC (uM)	196.541	Staphylococcus aureus	MD	N/A	16	N/A	None	None	9	EF	Gram+	GIT	0	1	0	0	t	0.447154	-0.004	-0.001	0.122096	0.0733832	0.0748523	-0.147399	-0.119733	-0.138991	-0.15039	-3.11552e-05	-3.11552e-05	81.408	11.6	2.545	3.5965	18	24		Int. J. Nanomedicine 2012 7 6003-6009"	COMPLEMENTARY	ZnON/ANoneNoneN/A	Gram+GIT
65	0	0	6.04463e-16	0	0.5	0	0.262795	ZnO	MBC (uM)	196.541	Staphylococcus aureus	MD	N/A	16	N/A	None	None	6	CT	Gram-	SYS	0	1	0	0	t	0.447154	0.00457143	0.00557143	0.129748	0.11685	0.11775	-0.147399	-0.119733	-0.138991	-0.15039	-3.11552e-05	-3.11552e-05	81.408	11.6	2.545	3.5965	18	24		Int. J. Nanomedicine 2012 7 6003-6009"	COMPLEMENTARY	ZnON/ANoneNoneN/A	Gram-SYS
65	0	0	6.39159e-11	0	0.5	0	0.265209	ZnO	MBC (uM)	196.541	Staphylococcus aureus	MD	N/A	16	N/A	None	None	24	ST	Gram+	RES	0	1	0	0	t	0.447154	0.00133333	0.00233333	0.124568	0.0735856	0.0748657	-0.147399	-0.119733	-0.138991	-0.15039	-3.11552e-05	-3.11552e-05	81.408	11.6	2.545	3.5965	18	24		Int. J. Nanomedicine 2012 7 6003-6009"	COMPLEMENTARY	ZnON/ANoneNoneN/A	Gram+RES
65	0	0	9.40293e-07	0	0.5	0	0.266812	ZnO	MBC (uM)	196.541	Staphylococcus aureus	MD	N/A	16	N/A	None	None	23	SC	Gram-	NO	0	0	0	0	t	0.447154	-0.0035	-0.0025	0.111339	0.0377349	0.0396256	-0.147399	-0.119733	-0.138991	-0.15039	-3.11552e-05	-3.11552e-05	81.408	11.6	2.545	3.5965	18	24		Int. J. Nanomedicine 2012 7 6003-6009"	COMPLEMENTARY	ZnON/ANoneNoneN/A	Gram-NO
66	0	0	0.083325	0	0.5	0	0.268731	ZnO	MBC (uM)	221.108	Escherichia coli	MD	N/A	16	N/A	None	None	8	EC	Gram-	GIT	0	1	0	1	t	0.447154	-0.004	-0.004	0.100485	0.00996768	0.0108964	-0.147399	-0.119733	-0.138991	-0.15039	-3.11552e-05	-3.11552e-05	81.408	11.6	2.545	3.5965	18	24		Int. J. Nanomedicine 2012 7 6003-6009"	COMPLEMENTARY	ZnON/ANoneNoneN/A	Gram-GIT
66	0	0	5.01787e-13	0	0.5	0	0.265053	ZnO	MBC (uM)	221.108	Escherichia coli	MD	N/A	16	N/A	None	None	21	PN	Gram+	RES	0	1	0	0	t	0.447154	-0.000666667	0.00233333	0.123904	0.0718737	0.0736966	-0.147399	-0.119733	-0.138991	-0.15039	-3.11552e-05	-3.11552e-05	81.408	11.6	2.545	3.5965	18	24		Int. J. Nanomedicine 2012 7 6003-6009"	COMPLEMENTARY	ZnON/ANoneNoneN/A	Gram+RES
66	0	0	6.39159e-11	0	0.5	0	0.265209	ZnO	MBC (uM)	221.108	Escherichia coli	MD	N/A	16	N/A	None	None	24	ST	Gram+	RES	0	1	0	0	t	0.447154	0.00133333	0.00233333	0.124568	0.0735856	0.0748657	-0.147399	-0.119733	-0.138991	-0.15039	-3.11552e-05	-3.11552e-05	81.408	11.6	2.545	3.5965	18	24		Int. J. Nanomedicine 2012 7 6003-6009"	COMPLEMENTARY	ZnON/ANoneNoneN/A	Gram+RES
66	0	0	0.083325	0	0.5	0	0.268731	ZnO	MBC (uM)	221.108	Escherichia coli	MD	N/A	16	N/A	None	None	8	EC	Gram-	GIT	0	1	0	1	t	0.447154	-0.004	-0.004	0.100485	0.00996768	0.0108964	-0.147399	-0.119733	-0.138991	-0.15039	-3.11552e-05	-3.11552e-05	81.408	11.6	2.545	3.5965	18	24		Int. J. Nanomedicine 2012 7 6003-6009"	COMPLEMENTARY	ZnON/ANoneNoneN/A	Gram-GIT
66	0	0	5.01787e-13	0	0.5	0	0.265053	ZnO	MBC (uM)	221.108	Escherichia coli	MD	N/A	16	N/A	None	None	21	PN	Gram+	RES	0	1	0	0	t	0.447154	-0.000666667	0.00233333	0.123904	0.0718737	0.0736966	-0.147399	-0.119733	-0.138991	-0.15039	-3.11552e-05	-3.11552e-05	81.408	11.6	2.545	3.5965	18	24		Int. J. Nanomedicine 2012 7 6003-6009"	COMPLEMENTARY	ZnON/ANoneNoneN/A	Gram+RES
66	0	0	6.39159e-11	0	0.5	0	0.265209	ZnO	MBC (uM)	221.108	Escherichia coli	MD	N/A	16	N/A	None	None	24	ST	Gram+	RES	0	1	0	0	t	0.447154	0.00133333	0.00233333	0.124568	0.0735856	0.0748657	-0.147399	-0.119733	-0.138991	-0.15039	-3.11552e-05	-3.11552e-05	81.408	11.6	2.545	3.5965	18	24		Int. J. Nanomedicine 2012 7 6003-6009"	COMPLEMENTARY	ZnON/ANoneNoneN/A	Gram+RES
66	0	0	2.78104e-13	0	0.5	0	0.263974	ZnO	MBC (uM)	221.108	Escherichia coli	MD	N/A	16	N/A	None	None	20	PG	Gram-	SYS	0	1	0	0	t	0.447154	-0.00442857	-0.00142857	0.11973	0.0759019	0.0779623	-0.147399	-0.119733	-0.138991	-0.15039	-3.11552e-05	-3.11552e-05	81.408	11.6	2.545	3.5965	18	24		Int. J. Nanomedicine 2012 7 6003-6009"	COMPLEMENTARY	ZnON/ANoneNoneN/A	Gram-SYS
66	0	0	0.00421092	0	0.5	0	0.26607	ZnO	MBC (uM)	221.108	Escherichia coli	MD	N/A	16	N/A	None	None	16	MT	Gram-	RES	0	1	0	0	t	0.447154	-0.009	-0.01	0.0993988	0.0302842	0.0319897	-0.147399	-0.119733	-0.138991	-0.15039	-3.11552e-05	-3.11552e-05	81.408	11.6	2.545	3.5965	18	24		Int. J. Nanomedicine 2012 7 6003-6009"	COMPLEMENTARY	ZnON/ANoneNoneN/A	Gram-RES
66	0	0	0.0160663	0	0.5	0	0.269273	ZnO	MBC (uM)	221.108	Escherichia coli	MD	N/A	16	N/A	None	None	25	TY	Gram+	SYS	0	1	0	0	t	0.447154	-0.0005	-0.0005	0.10259	0.0124517	0.0135345	-0.147399	-0.119733	-0.138991	-0.15039	-3.11552e-05	-3.11552e-05	81.408	11.6	2.545	3.5965	18	24		Int. J. Nanomedicine 2012 7 6003-6009"	COMPLEMENTARY	ZnON/ANoneNoneN/A	Gram+SYS
66	0	0	6.04463e-16	0	0.5	0	0.262795	ZnO	MBC (uM)	221.108	Escherichia coli	MD	N/A	16	N/A	None	None	6	CT	Gram-	SYS	0	1	0	0	t	0.447154	0.00457143	0.00557143	0.129748	0.11685	0.11775	-0.147399	-0.119733	-0.138991	-0.15039	-3.11552e-05	-3.11552e-05	81.408	11.6	2.545	3.5965	18	24		Int. J. Nanomedicine 2012 7 6003-6009"	COMPLEMENTARY	ZnON/ANoneNoneN/A	Gram-SYS
66	0	0	1.29709e-12	0	0.5	0	0.264265	ZnO	MBC (uM)	221.108	Escherichia coli	MD	N/A	16	N/A	None	None	9	EF	Gram+	GIT	0	1	0	0	t	0.447154	-0.004	-0.001	0.122096	0.0733832	0.0748523	-0.147399	-0.119733	-0.138991	-0.15039	-3.11552e-05	-3.11552e-05	81.408	11.6	2.545	3.5965	18	24		Int. J. Nanomedicine 2012 7 6003-6009"	COMPLEMENTARY	ZnON/ANoneNoneN/A	Gram+GIT
66	0	0	0.00108309	0	0.5	0	0.267407	ZnO	MBC (uM)	221.108	Escherichia coli	MD	N/A	16	N/A	None	None	10	HI	Gram-	SYS	0	1	0	0	t	0.447154	0.00357143	0.000571429	0.114325	0.0458025	0.0470383	-0.147399	-0.119733	-0.138991	-0.15039	-3.11552e-05	-3.11552e-05	81.408	11.6	2.545	3.5965	18	24		Int. J. Nanomedicine 2012 7 6003-6009"	COMPLEMENTARY	ZnON/ANoneNoneN/A	Gram-SYS
67	0	0	0.220908	0	0.5	0	0.270296	CuO	MBC (uM)	251.43	Bacillus sbtilis	MD	N/A	16	N/A	None	None	2	BS	Gram+	NO	0	0	0	1	t	0.447154	0.00566667	0.00366667	0.101743	0.0139675	0.0151696	-0.147392	-0.123566	-0.140528	-0.15039	-3.11552e-05	-3.11552e-05	79.545	10.55	2.695	3.7465	22	24	ND	Int. J. Nanomedicine 2012 7 6003-6009"	COMPLEMENTARY	CuON/ANoneNoneN/A	Gram+NO
67	0	0	1.30146e-12	0	0.5	0	0.264265	CuO	MBC (uM)	251.43	Bacillus sbtilis	MD	N/A	16	N/A	None	None	9	EF	Gram+	GIT	0	1	0	0	t	0.447154	-0.004	-0.001	0.122096	0.0733832	0.0748523	-0.147392	-0.123566	-0.140528	-0.15039	-3.11552e-05	-3.11552e-05	79.545	10.55	2.695	3.7465	22	24	ND	Int. J. Nanomedicine 2012 7 6003-6009"	COMPLEMENTARY	CuON/ANoneNoneN/A	Gram+GIT
67	0	0	0.00108674	0	0.5	0	0.267407	CuO	MBC (uM)	251.43	Bacillus sbtilis	MD	N/A	16	N/A	None	None	10	HI	Gram-	SYS	0	1	0	0	t	0.447154	0.00357143	0.000571429	0.114325	0.0458025	0.0470383	-0.147392	-0.123566	-0.140528	-0.15039	-3.11552e-05	-3.11552e-05	79.545	10.55	2.695	3.7465	22	24	ND	Int. J. Nanomedicine 2012 7 6003-6009"	COMPLEMENTARY	CuON/ANoneNoneN/A	Gram-SYS
67	0	0	3.92743e-13	0	0.5	0	0.265359	CuO	MBC (uM)	251.43	Bacillus sbtilis	MD	N/A	16	N/A	None	None	11	HP	Gram-	GIT	0	1	0	0	t	0.447154	0.003	0.005	0.122648	0.0769584	0.0790809	-0.147392	-0.123566	-0.140528	-0.15039	-3.11552e-05	-3.11552e-05	79.545	10.55	2.695	3.7465	22	24	ND	Int. J. Nanomedicine 2012 7 6003-6009"	COMPLEMENTARY	CuON/ANoneNoneN/A	Gram-GIT
67	0	0	3.40782e-11	0	0.5	0	0.264573	CuO	MBC (uM)	251.43	Bacillus sbtilis	MD	N/A	16	N/A	None	None	12	MB	Gram+	RES	0	1	0	0	t	0.447154	-0.000666667	0.000333333	0.123234	0.0765476	0.0780157	-0.147392	-0.123566	-0.140528	-0.15039	-3.11552e-05	-3.11552e-05	79.545	10.55	2.695	3.7465	22	24	ND	Int. J. Nanomedicine 2012 7 6003-6009"	COMPLEMENTARY	CuON/ANoneNoneN/A	Gram+RES
67	0	0	2.52716e-11	0	0.5	0	0.264827	CuO	MBC (uM)	251.43	Bacillus sbtilis	MD	N/A	16	N/A	None	None	14	ML	Gram+	SYS	0	1	0	0	t	0.447154	0.0005	0.0015	0.124762	0.0763677	0.0778832	-0.147392	-0.123566	-0.140528	-0.15039	-3.11552e-05	-3.11552e-05	79.545	10.55	2.695	3.7465	22	24	ND	Int. J. Nanomedicine 2012 7 6003-6009"	COMPLEMENTARY	CuON/ANoneNoneN/A	Gram+SYS
67	0	0	0.00422507	0	0.5	0	0.26607	CuO	MBC (uM)	251.43	Bacillus sbtilis	MD	N/A	16	N/A	None	None	16	MT	Gram-	RES	0	1	0	0	t	0.447154	-0.009	-0.01	0.0993988	0.0302842	0.0319897	-0.147392	-0.123566	-0.140528	-0.15039	-3.11552e-05	-3.11552e-05	79.545	10.55	2.695	3.7465	22	24	ND	Int. J. Nanomedicine 2012 7 6003-6009"	COMPLEMENTARY	CuON/ANoneNoneN/A	Gram-RES
67	0	0	5.0348e-13	0	0.5	0	0.265053	CuO	MBC (uM)	251.43	Bacillus sbtilis	MD	N/A	16	N/A	None	None	21	PN	Gram+	RES	0	1	0	0	t	0.447154	-0.000666667	0.00233333	0.123904	0.0718737	0.0736966	-0.147392	-0.123566	-0.140528	-0.15039	-3.11552e-05	-3.11552e-05	79.545	10.55	2.695	3.7465	22	24	ND	Int. J. Nanomedicine 2012 7 6003-6009"	COMPLEMENTARY	CuON/ANoneNoneN/A	Gram+RES
67	0	0	9.43466e-07	0	0.5	0	0.266812	CuO	MBC (uM)	251.43	Bacillus sbtilis	MD	N/A	16	N/A	None	None	23	SC	Gram-	NO	0	0	0	0	t	0.447154	-0.0035	-0.0025	0.111339	0.0377349	0.0396256	-0.147392	-0.123566	-0.140528	-0.15039	-3.11552e-05	-3.11552e-05	79.545	10.55	2.695	3.7465	22	24	ND	Int. J. Nanomedicine 2012 7 6003-6009"	COMPLEMENTARY	CuON/ANoneNoneN/A	Gram-NO
67	0	0	6.41315e-11	0	0.5	0	0.265209	CuO	MBC (uM)	251.43	Bacillus sbtilis	MD	N/A	16	N/A	None	None	24	ST	Gram+	RES	0	1	0	0	t	0.447154	0.00133333	0.00233333	0.124568	0.0735856	0.0748657	-0.147392	-0.123566	-0.140528	-0.15039	-3.11552e-05	-3.11552e-05	79.545	10.55	2.695	3.7465	22	24	ND	Int. J. Nanomedicine 2012 7 6003-6009"	COMPLEMENTARY	CuON/ANoneNoneN/A	Gram+RES
67	0	0	0.0161196	0	0.5	0	0.269273	CuO	MBC (uM)	251.43	Bacillus sbtilis	MD	N/A	16	N/A	None	None	25	TY	Gram+	SYS	0	1	0	0	t	0.447154	-0.0005	-0.0005	0.10259	0.0124517	0.0135345	-0.147392	-0.123566	-0.140528	-0.15039	-3.11552e-05	-3.11552e-05	79.545	10.55	2.695	3.7465	22	24	ND	Int. J. Nanomedicine 2012 7 6003-6009"	COMPLEMENTARY	CuON/ANoneNoneN/A	Gram+SYS
67	0	0	1.30146e-12	0	0.5	0	0.264265	CuO	MBC (uM)	251.43	Bacillus sbtilis	MD	N/A	16	N/A	None	None	9	EF	Gram+	GIT	0	1	0	0	t	0.447154	-0.004	-0.001	0.122096	0.0733832	0.0748523	-0.147392	-0.123566	-0.140528	-0.15039	-3.11552e-05	-3.11552e-05	79.545	10.55	2.695	3.7465	22	24	ND	Int. J. Nanomedicine 2012 7 6003-6009"	COMPLEMENTARY	CuON/ANoneNoneN/A	Gram+GIT
67	0	0	0.00422507	0	0.5	0	0.26607	CuO	MBC (uM)	251.43	Bacillus sbtilis	MD	N/A	16	N/A	None	None	16	MT	Gram-	RES	0	1	0	0	t	0.447154	-0.009	-0.01	0.0993988	0.0302842	0.0319897	-0.147392	-0.123566	-0.140528	-0.15039	-3.11552e-05	-3.11552e-05	79.545	10.55	2.695	3.7465	22	24	ND	Int. J. Nanomedicine 2012 7 6003-6009"	COMPLEMENTARY	CuON/ANoneNoneN/A	Gram-RES
67	0	0	5.0348e-13	0	0.5	0	0.265053	CuO	MBC (uM)	251.43	Bacillus sbtilis	MD	N/A	16	N/A	None	None	21	PN	Gram+	RES	0	1	0	0	t	0.447154	-0.000666667	0.00233333	0.123904	0.0718737	0.0736966	-0.147392	-0.123566	-0.140528	-0.15039	-3.11552e-05	-3.11552e-05	79.545	10.55	2.695	3.7465	22	24	ND	Int. J. Nanomedicine 2012 7 6003-6009"	COMPLEMENTARY	CuON/ANoneNoneN/A	Gram+RES
67	0	0	6.41315e-11	0	0.5	0	0.265209	CuO	MBC (uM)	251.43	Bacillus sbtilis	MD	N/A	16	N/A	None	None	24	ST	Gram+	RES	0	1	0	0	t	0.447154	0.00133333	0.00233333	0.124568	0.0735856	0.0748657	-0.147392	-0.123566	-0.140528	-0.15039	-3.11552e-05	-3.11552e-05	79.545	10.55	2.695	3.7465	22	24	ND	Int. J. Nanomedicine 2012 7 6003-6009"	COMPLEMENTARY	CuON/ANoneNoneN/A	Gram+RES
67	0	0	0.220908	0	0.5	0	0.270296	CuO	MBC (uM)	251.43	Bacillus sbtilis	MD	N/A	16	N/A	None	None	2	BS	Gram+	NO	0	0	0	1	t	0.447154	0.00566667	0.00366667	0.101743	0.0139675	0.0151696	-0.147392	-0.123566	-0.140528	-0.15039	-3.11552e-05	-3.11552e-05	79.545	10.55	2.695	3.7465	22	24	ND	Int. J. Nanomedicine 2012 7 6003-6009"	COMPLEMENTARY	CuON/ANoneNoneN/A	Gram+NO
67	0	0	3.40782e-11	0	0.5	0	0.264573	CuO	MBC (uM)	251.43	Bacillus sbtilis	MD	N/A	16	N/A	None	None	12	MB	Gram+	RES	0	1	0	0	t	0.447154	-0.000666667	0.000333333	0.123234	0.0765476	0.0780157	-0.147392	-0.123566	-0.140528	-0.15039	-3.11552e-05	-3.11552e-05	79.545	10.55	2.695	3.7465	22	24	ND	Int. J. Nanomedicine 2012 7 6003-6009"	COMPLEMENTARY	CuON/ANoneNoneN/A	Gram+RES
67	0	0	3.92743e-13	0	0.5	0	0.265359	CuO	MBC (uM)	251.43	Bacillus sbtilis	MD	N/A	16	N/A	None	None	11	HP	Gram-	GIT	0	1	0	0	t	0.447154	0.003	0.005	0.122648	0.0769584	0.0790809	-0.147392	-0.123566	-0.140528	-0.15039	-3.11552e-05	-3.11552e-05	79.545	10.55	2.695	3.7465	22	24	ND	Int. J. Nanomedicine 2012 7 6003-6009"	COMPLEMENTARY	CuON/ANoneNoneN/A	Gram-GIT
67	0	0	0.00108674	0	0.5	0	0.267407	CuO	MBC (uM)	251.43	Bacillus sbtilis	MD	N/A	16	N/A	None	None	10	HI	Gram-	SYS	0	1	0	0	t	0.447154	0.00357143	0.000571429	0.114325	0.0458025	0.0470383	-0.147392	-0.123566	-0.140528	-0.15039	-3.11552e-05	-3.11552e-05	79.545	10.55	2.695	3.7465	22	24	ND	Int. J. Nanomedicine 2012 7 6003-6009"	COMPLEMENTARY	CuON/ANoneNoneN/A	Gram-SYS
67	0	0	9.43466e-07	0	0.5	0	0.266812	CuO	MBC (uM)	251.43	Bacillus sbtilis	MD	N/A	16	N/A	None	None	23	SC	Gram-	NO	0	0	0	0	t	0.447154	-0.0035	-0.0025	0.111339	0.0377349	0.0396256	-0.147392	-0.123566	-0.140528	-0.15039	-3.11552e-05	-3.11552e-05	79.545	10.55	2.695	3.7465	22	24	ND	Int. J. Nanomedicine 2012 7 6003-6009"	COMPLEMENTARY	CuON/ANoneNoneN/A	Gram-NO
67	0	0	0.0161196	0	0.5	0	0.269273	CuO	MBC (uM)	251.43	Bacillus sbtilis	MD	N/A	16	N/A	None	None	25	TY	Gram+	SYS	0	1	0	0	t	0.447154	-0.0005	-0.0005	0.10259	0.0124517	0.0135345	-0.147392	-0.123566	-0.140528	-0.15039	-3.11552e-05	-3.11552e-05	79.545	10.55	2.695	3.7465	22	24	ND	Int. J. Nanomedicine 2012 7 6003-6009"	COMPLEMENTARY	CuON/ANoneNoneN/A	Gram+SYS
67	0	0	3.0796e-12	0	0.5	0	0.264423	CuO	MBC (uM)	251.43	Bacillus sbtilis	MD	N/A	16	N/A	None	None	17	NG	Gram-	SYS	0	1	0	0	t	0.447154	-0.00442857	-0.00142857	0.120653	0.0699347	0.0714951	-0.147392	-0.123566	-0.140528	-0.15039	-3.11552e-05	-3.11552e-05	79.545	10.55	2.695	3.7465	22	24	ND	Int. J. Nanomedicine 2012 7 6003-6009"	COMPLEMENTARY	CuON/ANoneNoneN/A	Gram-SYS
67	0	0	4.86167e-13	0	0.5	0	0.264273	CuO	MBC (uM)	251.43	Bacillus sbtilis	MD	N/A	16	N/A	None	None	18	NM	Gram-	SYS	0	1	0	0	t	0.447154	-0.00342857	-0.000428571	0.121918	0.0747641	0.0765299	-0.147392	-0.123566	-0.140528	-0.15039	-3.11552e-05	-3.11552e-05	79.545	10.55	2.695	3.7465	22	24	ND	Int. J. Nanomedicine 2012 7 6003-6009"	COMPLEMENTARY	CuON/ANoneNoneN/A	Gram-SYS
67	0	0	3.20893e-13	0	0.5	0	0.261635	CuO	MBC (uM)	251.43	Bacillus sbtilis	MD	N/A	16	N/A	None	None	15	MP	Gram-	RES	0	1	0	0	t	0.447154	-0.005	-0.004	0.119769	0.105756	0.105967	-0.147392	-0.123566	-0.140528	-0.15039	-3.11552e-05	-3.11552e-05	79.545	10.55	2.695	3.7465	22	24	ND	Int. J. Nanomedicine 2012 7 6003-6009"	COMPLEMENTARY	CuON/ANoneNoneN/A	Gram-RES
67	0	0	1.73639e-12	0	0.5	0	0.264179	CuO	MBC (uM)	251.43	Bacillus sbtilis	MD	N/A	16	N/A	None	None	4	CJ	Gram-	GIT	0	1	0	0	t	0.447154	-0.002	0	0.122397	0.0791961	0.0807547	-0.147392	-0.123566	-0.140528	-0.15039	-3.11552e-05	-3.11552e-05	79.545	10.55	2.695	3.7465	22	24	ND	Int. J. Nanomedicine 2012 7 6003-6009"	COMPLEMENTARY	CuON/ANoneNoneN/A	Gram-GIT
67	0	0	0.220908	0	0.5	0	0.270296	CuO	MBC (uM)	251.43	Bacillus sbtilis	MD	N/A	16	N/A	None	None	2	BS	Gram+	NO	0	0	0	1	t	0.447154	0.00566667	0.00366667	0.101743	0.0139675	0.0151696	-0.147392	-0.123566	-0.140528	-0.15039	-3.11552e-05	-3.11552e-05	79.545	10.55	2.695	3.7465	22	24	ND	Int. J. Nanomedicine 2012 7 6003-6009"	COMPLEMENTARY	CuON/ANoneNoneN/A	Gram+NO
67	0	0	2.52716e-11	0	0.5	0	0.264827	CuO	MBC (uM)	251.43	Bacillus sbtilis	MD	N/A	16	N/A	None	None	14	ML	Gram+	SYS	0	1	0	0	t	0.447154	0.0005	0.0015	0.124762	0.0763677	0.0778832	-0.147392	-0.123566	-0.140528	-0.15039	-3.11552e-05	-3.11552e-05	79.545	10.55	2.695	3.7465	22	24	ND	Int. J. Nanomedicine 2012 7 6003-6009"	COMPLEMENTARY	CuON/ANoneNoneN/A	Gram+SYS
67	0	0	8.92557e-10	0	0.5	0	0.265218	CuO	MBC (uM)	251.43	Bacillus sbtilis	MD	N/A	16	N/A	None	None	1	AB	Gram-	GIT	0	1	0	0	t	0.447154	0.003	0.002	0.121641	0.0757609	0.077817	-0.147392	-0.123566	-0.140528	-0.15039	-3.11552e-05	-3.11552e-05	79.545	10.55	2.695	3.7465	22	24	ND	Int. J. Nanomedicine 2012 7 6003-6009"	COMPLEMENTARY	CuON/ANoneNoneN/A	Gram-GIT
67	0	0	6.06502e-16	0	0.5	0	0.262795	CuO	MBC (uM)	251.43	Bacillus sbtilis	MD	N/A	16	N/A	None	None	6	CT	Gram-	SYS	0	1	0	0	t	0.447154	0.00457143	0.00557143	0.129748	0.11685	0.11775	-0.147392	-0.123566	-0.140528	-0.15039	-3.11552e-05	-3.11552e-05	79.545	10.55	2.695	3.7465	22	24	ND	Int. J. Nanomedicine 2012 7 6003-6009"	COMPLEMENTARY	CuON/ANoneNoneN/A	Gram-SYS
68	0	0	0.00108674	0	0.5	0	0.267407	CuO	MBC (uM)	276.573	Staphylococcus aureus	MD	N/A	16	N/A	None	None	10	HI	Gram-	SYS	0	1	0	0	t	0.447154	0.00357143	0.000571429	0.114325	0.0458025	0.0470383	-0.147392	-0.123566	-0.140528	-0.15039	-3.11552e-05	-3.11552e-05	79.545	10.55	2.695	3.7465	22	24		Int. J. Nanomedicine 2012 7 6003-6009"	COMPLEMENTARY	CuON/ANoneNoneN/A	Gram-SYS
68	0	0	0.0161196	0	0.5	0	0.269273	CuO	MBC (uM)	276.573	Staphylococcus aureus	MD	N/A	16	N/A	None	None	25	TY	Gram+	SYS	0	1	0	0	t	0.447154	-0.0005	-0.0005	0.10259	0.0124517	0.0135345	-0.147392	-0.123566	-0.140528	-0.15039	-3.11552e-05	-3.11552e-05	79.545	10.55	2.695	3.7465	22	24		Int. J. Nanomedicine 2012 7 6003-6009"	COMPLEMENTARY	CuON/ANoneNoneN/A	Gram+SYS
68	0	0	0.00422507	0	0.5	0	0.26607	CuO	MBC (uM)	276.573	Staphylococcus aureus	MD	N/A	16	N/A	None	None	16	MT	Gram-	RES	0	1	0	0	t	0.447154	-0.009	-0.01	0.0993988	0.0302842	0.0319897	-0.147392	-0.123566	-0.140528	-0.15039	-3.11552e-05	-3.11552e-05	79.545	10.55	2.695	3.7465	22	24		Int. J. Nanomedicine 2012 7 6003-6009"	COMPLEMENTARY	CuON/ANoneNoneN/A	Gram-RES
68	0	0	1.73639e-12	0	0.5	0	0.264179	CuO	MBC (uM)	276.573	Staphylococcus aureus	MD	N/A	16	N/A	None	None	4	CJ	Gram-	GIT	0	1	0	0	t	0.447154	-0.002	0	0.122397	0.0791961	0.0807547	-0.147392	-0.123566	-0.140528	-0.15039	-3.11552e-05	-3.11552e-05	79.545	10.55	2.695	3.7465	22	24		Int. J. Nanomedicine 2012 7 6003-6009"	COMPLEMENTARY	CuON/ANoneNoneN/A	Gram-GIT
68	0	0	1.30146e-12	0	0.5	0	0.264265	CuO	MBC (uM)	276.573	Staphylococcus aureus	MD	N/A	16	N/A	None	None	9	EF	Gram+	GIT	0	1	0	0	t	0.447154	-0.004	-0.001	0.122096	0.0733832	0.0748523	-0.147392	-0.123566	-0.140528	-0.15039	-3.11552e-05	-3.11552e-05	79.545	10.55	2.695	3.7465	22	24		Int. J. Nanomedicine 2012 7 6003-6009"	COMPLEMENTARY	CuON/ANoneNoneN/A	Gram+GIT
68	0	0	9.43466e-07	0	0.5	0	0.266812	CuO	MBC (uM)	276.573	Staphylococcus aureus	MD	N/A	16	N/A	None	None	23	SC	Gram-	NO	0	0	0	0	t	0.447154	-0.0035	-0.0025	0.111339	0.0377349	0.0396256	-0.147392	-0.123566	-0.140528	-0.15039	-3.11552e-05	-3.11552e-05	79.545	10.55	2.695	3.7465	22	24		Int. J. Nanomedicine 2012 7 6003-6009"	COMPLEMENTARY	CuON/ANoneNoneN/A	Gram-NO
68	0	0	6.41315e-11	0	0.5	0	0.265209	CuO	MBC (uM)	276.573	Staphylococcus aureus	MD	N/A	16	N/A	None	None	24	ST	Gram+	RES	0	1	0	0	t	0.447154	0.00133333	0.00233333	0.124568	0.0735856	0.0748657	-0.147392	-0.123566	-0.140528	-0.15039	-3.11552e-05	-3.11552e-05	79.545	10.55	2.695	3.7465	22	24		Int. J. Nanomedicine 2012 7 6003-6009"	COMPLEMENTARY	CuON/ANoneNoneN/A	Gram+RES
68	0	0	6.06502e-16	0	0.5	0	0.262795	CuO	MBC (uM)	276.573	Staphylococcus aureus	MD	N/A	16	N/A	None	None	6	CT	Gram-	SYS	0	1	0	0	t	0.447154	0.00457143	0.00557143	0.129748	0.11685	0.11775	-0.147392	-0.123566	-0.140528	-0.15039	-3.11552e-05	-3.11552e-05	79.545	10.55	2.695	3.7465	22	24		Int. J. Nanomedicine 2012 7 6003-6009"	COMPLEMENTARY	CuON/ANoneNoneN/A	Gram-SYS
69	0	0	0.117718	0	0.5	0	0.268749	CdO	MBC (uM)	311.502	Escherichia coli	K-12	Spherical	16	N/A	None	None	8	EC	Gram-	GIT	0	1	0	1	t	0.447154	-0.004	-0.004	0.100485	0.00996768	0.0108964	-0.146467	-0.12025	-0.142676	-0.150317	-0.000498218	-0.000498218	128.41	13.55	2.565	3.9965	22	24		Langmuir 2012 28 16614âˆ’16622"	COMPLEMENTARY	CdOSphericalNoneNoneN/A	Gram-GIT
69	0	0	7.3654e-13	0	0.5	0	0.265072	CdO	MBC (uM)	311.502	Escherichia coli	K-12	Spherical	16	N/A	None	None	21	PN	Gram+	RES	0	1	0	0	t	0.447154	-0.000666667	0.00233333	0.123904	0.0718737	0.0736966	-0.146467	-0.12025	-0.142676	-0.150317	-0.000498218	-0.000498218	128.41	13.55	2.565	3.9965	22	24		Langmuir 2012 28 16614âˆ’16622"	COMPLEMENTARY	CdOSphericalNoneNoneN/A	Gram+RES
69	0	0	9.38179e-11	0	0.5	0	0.265228	CdO	MBC (uM)	311.502	Escherichia coli	K-12	Spherical	16	N/A	None	None	24	ST	Gram+	RES	0	1	0	0	t	0.447154	0.00133333	0.00233333	0.124568	0.0735856	0.0748657	-0.146467	-0.12025	-0.142676	-0.150317	-0.000498218	-0.000498218	128.41	13.55	2.565	3.9965	22	24		Langmuir 2012 28 16614âˆ’16622"	COMPLEMENTARY	CdOSphericalNoneNoneN/A	Gram+RES
69	0	0	0.117718	0	0.5	0	0.268749	CdO	MBC (uM)	311.502	Escherichia coli	K-12	Spherical	16	N/A	None	None	8	EC	Gram-	GIT	0	1	0	1	t	0.447154	-0.004	-0.004	0.100485	0.00996768	0.0108964	-0.146467	-0.12025	-0.142676	-0.150317	-0.000498218	-0.000498218	128.41	13.55	2.565	3.9965	22	24		Langmuir 2012 28 16614âˆ’16622"	COMPLEMENTARY	CdOSphericalNoneNoneN/A	Gram-GIT
69	0	0	7.3654e-13	0	0.5	0	0.265072	CdO	MBC (uM)	311.502	Escherichia coli	K-12	Spherical	16	N/A	None	None	21	PN	Gram+	RES	0	1	0	0	t	0.447154	-0.000666667	0.00233333	0.123904	0.0718737	0.0736966	-0.146467	-0.12025	-0.142676	-0.150317	-0.000498218	-0.000498218	128.41	13.55	2.565	3.9965	22	24		Langmuir 2012 28 16614âˆ’16622"	COMPLEMENTARY	CdOSphericalNoneNoneN/A	Gram+RES
69	0	0	9.38179e-11	0	0.5	0	0.265228	CdO	MBC (uM)	311.502	Escherichia coli	K-12	Spherical	16	N/A	None	None	24	ST	Gram+	RES	0	1	0	0	t	0.447154	0.00133333	0.00233333	0.124568	0.0735856	0.0748657	-0.146467	-0.12025	-0.142676	-0.150317	-0.000498218	-0.000498218	128.41	13.55	2.565	3.9965	22	24		Langmuir 2012 28 16614âˆ’16622"	COMPLEMENTARY	CdOSphericalNoneNoneN/A	Gram+RES
69	0	0	0.0234067	0	0.5	0	0.269292	CdO	MBC (uM)	311.502	Escherichia coli	K-12	Spherical	16	N/A	None	None	25	TY	Gram+	SYS	0	1	0	0	t	0.447154	-0.0005	-0.0005	0.10259	0.0124517	0.0135345	-0.146467	-0.12025	-0.142676	-0.150317	-0.000498218	-0.000498218	128.41	13.55	2.565	3.9965	22	24		Langmuir 2012 28 16614âˆ’16622"	COMPLEMENTARY	CdOSphericalNoneNoneN/A	Gram+SYS
69	0	0	4.08211e-13	0	0.5	0	0.263992	CdO	MBC (uM)	311.502	Escherichia coli	K-12	Spherical	16	N/A	None	None	20	PG	Gram-	SYS	0	1	0	0	t	0.447154	-0.00442857	-0.00142857	0.11973	0.0759019	0.0779623	-0.146467	-0.12025	-0.142676	-0.150317	-0.000498218	-0.000498218	128.41	13.55	2.565	3.9965	22	24		Langmuir 2012 28 16614âˆ’16622"	COMPLEMENTARY	CdOSphericalNoneNoneN/A	Gram-SYS
69	0	0	0.00616878	0	0.5	0	0.266089	CdO	MBC (uM)	311.502	Escherichia coli	K-12	Spherical	16	N/A	None	None	16	MT	Gram-	RES	0	1	0	0	t	0.447154	-0.009	-0.01	0.0993988	0.0302842	0.0319897	-0.146467	-0.12025	-0.142676	-0.150317	-0.000498218	-0.000498218	128.41	13.55	2.565	3.9965	22	24		Langmuir 2012 28 16614âˆ’16622"	COMPLEMENTARY	CdOSphericalNoneNoneN/A	Gram-RES
69	0	0	0.00158899	0	0.5	0	0.267425	CdO	MBC (uM)	311.502	Escherichia coli	K-12	Spherical	16	N/A	None	None	10	HI	Gram-	SYS	0	1	0	0	t	0.447154	0.00357143	0.000571429	0.114325	0.0458025	0.0470383	-0.146467	-0.12025	-0.142676	-0.150317	-0.000498218	-0.000498218	128.41	13.55	2.565	3.9965	22	24		Langmuir 2012 28 16614âˆ’16622"	COMPLEMENTARY	CdOSphericalNoneNoneN/A	Gram-SYS
69	0	0	2.54016e-12	0	0.5	0	0.264197	CdO	MBC (uM)	311.502	Escherichia coli	K-12	Spherical	16	N/A	None	None	4	CJ	Gram-	GIT	0	1	0	0	t	0.447154	-0.002	0	0.122397	0.0791961	0.0807547	-0.146467	-0.12025	-0.142676	-0.150317	-0.000498218	-0.000498218	128.41	13.55	2.565	3.9965	22	24		Langmuir 2012 28 16614âˆ’16622"	COMPLEMENTARY	CdOSphericalNoneNoneN/A	Gram-GIT
69	0	0	1.90391e-12	0	0.5	0	0.264283	CdO	MBC (uM)	311.502	Escherichia coli	K-12	Spherical	16	N/A	None	None	9	EF	Gram+	GIT	0	1	0	0	t	0.447154	-0.004	-0.001	0.122096	0.0733832	0.0748523	-0.146467	-0.12025	-0.142676	-0.150317	-0.000498218	-0.000498218	128.41	13.55	2.565	3.9965	22	24		Langmuir 2012 28 16614âˆ’16622"	COMPLEMENTARY	CdOSphericalNoneNoneN/A	Gram+GIT
69	0	0	0.247943	0	0.5	0	0.269918	CdO	MBC (uM)	311.502	Escherichia coli	K-12	Spherical	16	N/A	None	None	19	PA	Gram-	SYS	0	1	0	0	t	0.447154	0.00657143	0.00357143	0.102611	0.0205758	0.0222078	-0.146467	-0.12025	-0.142676	-0.150317	-0.000498218	-0.000498218	128.41	13.55	2.565	3.9965	22	24		Langmuir 2012 28 16614âˆ’16622"	COMPLEMENTARY	CdOSphericalNoneNoneN/A	Gram-SYS
69	0	0	8.87251e-16	0	0.5	0	0.262814	CdO	MBC (uM)	311.502	Escherichia coli	K-12	Spherical	16	N/A	None	None	6	CT	Gram-	SYS	0	1	0	0	t	0.447154	0.00457143	0.00557143	0.129748	0.11685	0.11775	-0.146467	-0.12025	-0.142676	-0.150317	-0.000498218	-0.000498218	128.41	13.55	2.565	3.9965	22	24		Langmuir 2012 28 16614âˆ’16622"	COMPLEMENTARY	CdOSphericalNoneNoneN/A	Gram-SYS
70	0	0	0.0835826	0	0.5	0	0.268731	CuO	MBC (uM)	314.288	Escherichia coli	MD	N/A	16	N/A	None	None	8	EC	Gram-	GIT	0	1	0	1	t	0.447154	-0.004	-0.004	0.100485	0.00996768	0.0108964	-0.147392	-0.123566	-0.140528	-0.15039	-3.11552e-05	-3.11552e-05	79.545	10.55	2.695	3.7465	22	24		Int. J. Nanomedicine 2012 7 6003-6009"	COMPLEMENTARY	CuON/ANoneNoneN/A	Gram-GIT
70	0	0	5.0348e-13	0	0.5	0	0.265053	CuO	MBC (uM)	314.288	Escherichia coli	MD	N/A	16	N/A	None	None	21	PN	Gram+	RES	0	1	0	0	t	0.447154	-0.000666667	0.00233333	0.123904	0.0718737	0.0736966	-0.147392	-0.123566	-0.140528	-0.15039	-3.11552e-05	-3.11552e-05	79.545	10.55	2.695	3.7465	22	24		Int. J. Nanomedicine 2012 7 6003-6009"	COMPLEMENTARY	CuON/ANoneNoneN/A	Gram+RES
70	0	0	6.41315e-11	0	0.5	0	0.265209	CuO	MBC (uM)	314.288	Escherichia coli	MD	N/A	16	N/A	None	None	24	ST	Gram+	RES	0	1	0	0	t	0.447154	0.00133333	0.00233333	0.124568	0.0735856	0.0748657	-0.147392	-0.123566	-0.140528	-0.15039	-3.11552e-05	-3.11552e-05	79.545	10.55	2.695	3.7465	22	24		Int. J. Nanomedicine 2012 7 6003-6009"	COMPLEMENTARY	CuON/ANoneNoneN/A	Gram+RES
70	0	0	0.0835826	0	0.5	0	0.268731	CuO	MBC (uM)	314.288	Escherichia coli	MD	N/A	16	N/A	None	None	8	EC	Gram-	GIT	0	1	0	1	t	0.447154	-0.004	-0.004	0.100485	0.00996768	0.0108964	-0.147392	-0.123566	-0.140528	-0.15039	-3.11552e-05	-3.11552e-05	79.545	10.55	2.695	3.7465	22	24		Int. J. Nanomedicine 2012 7 6003-6009"	COMPLEMENTARY	CuON/ANoneNoneN/A	Gram-GIT
70	0	0	6.41315e-11	0	0.5	0	0.265209	CuO	MBC (uM)	314.288	Escherichia coli	MD	N/A	16	N/A	None	None	24	ST	Gram+	RES	0	1	0	0	t	0.447154	0.00133333	0.00233333	0.124568	0.0735856	0.0748657	-0.147392	-0.123566	-0.140528	-0.15039	-3.11552e-05	-3.11552e-05	79.545	10.55	2.695	3.7465	22	24		Int. J. Nanomedicine 2012 7 6003-6009"	COMPLEMENTARY	CuON/ANoneNoneN/A	Gram+RES
70	0	0	5.0348e-13	0	0.5	0	0.265053	CuO	MBC (uM)	314.288	Escherichia coli	MD	N/A	16	N/A	None	None	21	PN	Gram+	RES	0	1	0	0	t	0.447154	-0.000666667	0.00233333	0.123904	0.0718737	0.0736966	-0.147392	-0.123566	-0.140528	-0.15039	-3.11552e-05	-3.11552e-05	79.545	10.55	2.695	3.7465	22	24		Int. J. Nanomedicine 2012 7 6003-6009"	COMPLEMENTARY	CuON/ANoneNoneN/A	Gram+RES
70	0	0	0.00422507	0	0.5	0	0.26607	CuO	MBC (uM)	314.288	Escherichia coli	MD	N/A	16	N/A	None	None	16	MT	Gram-	RES	0	1	0	0	t	0.447154	-0.009	-0.01	0.0993988	0.0302842	0.0319897	-0.147392	-0.123566	-0.140528	-0.15039	-3.11552e-05	-3.11552e-05	79.545	10.55	2.695	3.7465	22	24		Int. J. Nanomedicine 2012 7 6003-6009"	COMPLEMENTARY	CuON/ANoneNoneN/A	Gram-RES
70	0	0	1.73639e-12	0	0.5	0	0.264179	CuO	MBC (uM)	314.288	Escherichia coli	MD	N/A	16	N/A	None	None	4	CJ	Gram-	GIT	0	1	0	0	t	0.447154	-0.002	0	0.122397	0.0791961	0.0807547	-0.147392	-0.123566	-0.140528	-0.15039	-3.11552e-05	-3.11552e-05	79.545	10.55	2.695	3.7465	22	24		Int. J. Nanomedicine 2012 7 6003-6009"	COMPLEMENTARY	CuON/ANoneNoneN/A	Gram-GIT
70	0	0	0.0161196	0	0.5	0	0.269273	CuO	MBC (uM)	314.288	Escherichia coli	MD	N/A	16	N/A	None	None	25	TY	Gram+	SYS	0	1	0	0	t	0.447154	-0.0005	-0.0005	0.10259	0.0124517	0.0135345	-0.147392	-0.123566	-0.140528	-0.15039	-3.11552e-05	-3.11552e-05	79.545	10.55	2.695	3.7465	22	24		Int. J. Nanomedicine 2012 7 6003-6009"	COMPLEMENTARY	CuON/ANoneNoneN/A	Gram+SYS
70	0	0	0.183917	0	0.5	0	0.269899	CuO	MBC (uM)	314.288	Escherichia coli	MD	N/A	16	N/A	None	None	19	PA	Gram-	SYS	0	1	0	0	t	0.447154	0.00657143	0.00357143	0.102611	0.0205758	0.0222078	-0.147392	-0.123566	-0.140528	-0.15039	-3.11552e-05	-3.11552e-05	79.545	10.55	2.695	3.7465	22	24		Int. J. Nanomedicine 2012 7 6003-6009"	COMPLEMENTARY	CuON/ANoneNoneN/A	Gram-SYS
70	0	0	1.30146e-12	0	0.5	0	0.264265	CuO	MBC (uM)	314.288	Escherichia coli	MD	N/A	16	N/A	None	None	9	EF	Gram+	GIT	0	1	0	0	t	0.447154	-0.004	-0.001	0.122096	0.0733832	0.0748523	-0.147392	-0.123566	-0.140528	-0.15039	-3.11552e-05	-3.11552e-05	79.545	10.55	2.695	3.7465	22	24		Int. J. Nanomedicine 2012 7 6003-6009"	COMPLEMENTARY	CuON/ANoneNoneN/A	Gram+GIT
70	0	0	2.79042e-13	0	0.5	0	0.263974	CuO	MBC (uM)	314.288	Escherichia coli	MD	N/A	16	N/A	None	None	20	PG	Gram-	SYS	0	1	0	0	t	0.447154	-0.00442857	-0.00142857	0.11973	0.0759019	0.0779623	-0.147392	-0.123566	-0.140528	-0.15039	-3.11552e-05	-3.11552e-05	79.545	10.55	2.695	3.7465	22	24		Int. J. Nanomedicine 2012 7 6003-6009"	COMPLEMENTARY	CuON/ANoneNoneN/A	Gram-SYS
70	0	0	6.06502e-16	0	0.5	0	0.262795	CuO	MBC (uM)	314.288	Escherichia coli	MD	N/A	16	N/A	None	None	6	CT	Gram-	SYS	0	1	0	0	t	0.447154	0.00457143	0.00557143	0.129748	0.11685	0.11775	-0.147392	-0.123566	-0.140528	-0.15039	-3.11552e-05	-3.11552e-05	79.545	10.55	2.695	3.7465	22	24		Int. J. Nanomedicine 2012 7 6003-6009"	COMPLEMENTARY	CuON/ANoneNoneN/A	Gram-SYS
70	0	0	0.00108674	0	0.5	0	0.267407	CuO	MBC (uM)	314.288	Escherichia coli	MD	N/A	16	N/A	None	None	10	HI	Gram-	SYS	0	1	0	0	t	0.447154	0.00357143	0.000571429	0.114325	0.0458025	0.0470383	-0.147392	-0.123566	-0.140528	-0.15039	-3.11552e-05	-3.11552e-05	79.545	10.55	2.695	3.7465	22	24		Int. J. Nanomedicine 2012 7 6003-6009"	COMPLEMENTARY	CuON/ANoneNoneN/A	Gram-SYS
71	0	0	0.143601	0	0.5	0	0.269829	Au	MBC (uM)	324.928	Klebsiella pneumoniae	MDR	Spherical	7	PDT	Single	Monomer	25	TY	Gram+	SYS	0	1	0	0	t	0.447154	-0.0005	-0.0005	0.10259	0.0124517	0.0135345	-0.142944	-0.119615	-0.149459	-0.133639	0.000813959	-0.000847443	196.967	10.2	2.54	6.1	3.2	24	SC1=NC(N)=CC(N)=N1	J. Am. Chem. Soc. 2013 135 (35) 12940â€“12943"	COMPLEMENTARY	AuSphericalSingleMonomerPDT	Gram+SYS
71	0	0	6.20731e-15	0	0.5	0	0.263319	Au	MBC (uM)	324.928	Klebsiella pneumoniae	MDR	Spherical	7	PDT	Single	Monomer	6	CT	Gram-	SYS	0	1	0	0	t	0.447154	0.00457143	0.00557143	0.129748	0.11685	0.11775	-0.142944	-0.119615	-0.149459	-0.133639	0.000813959	-0.000847443	196.967	10.2	2.54	6.1	3.2	24	SC1=NC(N)=CC(N)=N1	J. Am. Chem. Soc. 2013 135 (35) 12940â€“12943"	COMPLEMENTARY	AuSphericalSingleMonomerPDT	Gram-SYS
71	0	0	0.0110118	0	0.5	0	0.267954	Au	MBC (uM)	324.928	Klebsiella pneumoniae	MDR	Spherical	7	PDT	Single	Monomer	10	HI	Gram-	SYS	0	1	0	0	t	0.447154	0.00357143	0.000571429	0.114325	0.0458025	0.0470383	-0.142944	-0.119615	-0.149459	-0.133639	0.000813959	-0.000847443	196.967	10.2	2.54	6.1	3.2	24	SC1=NC(N)=CC(N)=N1	J. Am. Chem. Soc. 2013 135 (35) 12940â€“12943"	COMPLEMENTARY	AuSphericalSingleMonomerPDT	Gram-SYS
71	0	0	0.0416181	0	0.5	0	0.266617	Au	MBC (uM)	324.928	Klebsiella pneumoniae	MDR	Spherical	7	PDT	Single	Monomer	16	MT	Gram-	RES	0	1	0	0	t	0.447154	-0.009	-0.01	0.0993988	0.0302842	0.0319897	-0.142944	-0.119615	-0.149459	-0.133639	0.000813959	-0.000847443	196.967	10.2	2.54	6.1	3.2	24	SC1=NC(N)=CC(N)=N1	J. Am. Chem. Soc. 2013 135 (35) 12940â€“12943"	COMPLEMENTARY	AuSphericalSingleMonomerPDT	Gram-RES
71	0	0	1.332e-11	0	0.5	0	0.264801	Au	MBC (uM)	324.928	Klebsiella pneumoniae	MDR	Spherical	7	PDT	Single	Monomer	9	EF	Gram+	GIT	0	1	0	0	t	0.447154	-0.004	-0.001	0.122096	0.0733832	0.0748523	-0.142944	-0.119615	-0.149459	-0.133639	0.000813959	-0.000847443	196.967	10.2	2.54	6.1	3.2	24	SC1=NC(N)=CC(N)=N1	J. Am. Chem. Soc. 2013 135 (35) 12940â€“12943"	COMPLEMENTARY	AuSphericalSingleMonomerPDT	Gram+GIT
71	0	0	6.5636e-10	0	0.5	0	0.265747	Au	MBC (uM)	324.928	Klebsiella pneumoniae	MDR	Spherical	7	PDT	Single	Monomer	24	ST	Gram+	RES	0	1	0	0	t	0.447154	0.00133333	0.00233333	0.124568	0.0735856	0.0748657	-0.142944	-0.119615	-0.149459	-0.133639	0.000813959	-0.000847443	196.967	10.2	2.54	6.1	3.2	24	SC1=NC(N)=CC(N)=N1	J. Am. Chem. Soc. 2013 135 (35) 12940â€“12943"	COMPLEMENTARY	AuSphericalSingleMonomerPDT	Gram+RES
71	0	0	1.77712e-11	0	0.5	0	0.264714	Au	MBC (uM)	324.928	Klebsiella pneumoniae	MDR	Spherical	7	PDT	Single	Monomer	4	CJ	Gram-	GIT	0	1	0	0	t	0.447154	-0.002	0	0.122397	0.0791961	0.0807547	-0.142944	-0.119615	-0.149459	-0.133639	0.000813959	-0.000847443	196.967	10.2	2.54	6.1	3.2	24	SC1=NC(N)=CC(N)=N1	J. Am. Chem. Soc. 2013 135 (35) 12940â€“12943"	COMPLEMENTARY	AuSphericalSingleMonomerPDT	Gram-GIT
72	0	0	0.0609783	0	0.5	0	0.267746	Au	MBC (uM)	324.928	Staphylococcus aureus	ATCC6538P	Spherical	1	PDT/Mel	Double	Monomer	16	MT	Gram-	RES	0	1	0	0	t	0.447154	-0.009	-0.01	0.0993988	0.0302842	0.0319897	-0.144067	-0.119627	-0.149464	-0.0932875	-0.000709045	-0.000709045	196.967	10.2	2.54	6.1	1.8	24	SC1=NC(N)=CC(N)=N1.c1(nc(nc(n1)N)N)N	J. Am. Chem. Soc. 2013 135 (35) 12940â€“12943"	COMPLEMENTARY	AuSphericalDoubleMonomerPDT/Mel	Gram-RES
72	0	0	9.28238e-15	0	0.5	0	0.2644	Au	MBC (uM)	324.928	Staphylococcus aureus	ATCC6538P	Spherical	1	PDT/Mel	Double	Monomer	6	CT	Gram-	SYS	0	1	0	0	t	0.447154	0.00457143	0.00557143	0.129748	0.11685	0.11775	-0.144067	-0.119627	-0.149464	-0.0932875	-0.000709045	-0.000709045	196.967	10.2	2.54	6.1	1.8	24	SC1=NC(N)=CC(N)=N1.c1(nc(nc(n1)N)N)N	J. Am. Chem. Soc. 2013 135 (35) 12940â€“12943"	COMPLEMENTARY	AuSphericalDoubleMonomerPDT/Mel	Gram-SYS
72	0	0	9.81518e-10	0	0.5	0	0.266856	Au	MBC (uM)	324.928	Staphylococcus aureus	ATCC6538P	Spherical	1	PDT/Mel	Double	Monomer	24	ST	Gram+	RES	0	1	0	0	t	0.447154	0.00133333	0.00233333	0.124568	0.0735856	0.0748657	-0.144067	-0.119627	-0.149464	-0.0932875	-0.000709045	-0.000709045	196.967	10.2	2.54	6.1	1.8	24	SC1=NC(N)=CC(N)=N1.c1(nc(nc(n1)N)N)N	J. Am. Chem. Soc. 2013 135 (35) 12940â€“12943"	COMPLEMENTARY	AuSphericalDoubleMonomerPDT/Mel	Gram+RES
72	0	0	0.200479	0	0.5	0	0.270973	Au	MBC (uM)	324.928	Staphylococcus aureus	ATCC6538P	Spherical	1	PDT/Mel	Double	Monomer	25	TY	Gram+	SYS	0	1	0	0	t	0.447154	-0.0005	-0.0005	0.10259	0.0124517	0.0135345	-0.144067	-0.119627	-0.149464	-0.0932875	-0.000709045	-0.000709045	196.967	10.2	2.54	6.1	1.8	24	SC1=NC(N)=CC(N)=N1.c1(nc(nc(n1)N)N)N	J. Am. Chem. Soc. 2013 135 (35) 12940â€“12943"	COMPLEMENTARY	AuSphericalDoubleMonomerPDT/Mel	Gram+SYS
72	0	0	0.0163777	0	0.5	0	0.269081	Au	MBC (uM)	324.928	Staphylococcus aureus	ATCC6538P	Spherical	1	PDT/Mel	Double	Monomer	10	HI	Gram-	SYS	0	1	0	0	t	0.447154	0.00357143	0.000571429	0.114325	0.0458025	0.0470383	-0.144067	-0.119627	-0.149464	-0.0932875	-0.000709045	-0.000709045	196.967	10.2	2.54	6.1	1.8	24	SC1=NC(N)=CC(N)=N1.c1(nc(nc(n1)N)N)N	J. Am. Chem. Soc. 2013 135 (35) 12940â€“12943"	COMPLEMENTARY	AuSphericalDoubleMonomerPDT/Mel	Gram-SYS
72	0	0	1.99186e-11	0	0.5	0	0.265907	Au	MBC (uM)	324.928	Staphylococcus aureus	ATCC6538P	Spherical	1	PDT/Mel	Double	Monomer	9	EF	Gram+	GIT	0	1	0	0	t	0.447154	-0.004	-0.001	0.122096	0.0733832	0.0748523	-0.144067	-0.119627	-0.149464	-0.0932875	-0.000709045	-0.000709045	196.967	10.2	2.54	6.1	1.8	24	SC1=NC(N)=CC(N)=N1.c1(nc(nc(n1)N)N)N	J. Am. Chem. Soc. 2013 135 (35) 12940â€“12943"	COMPLEMENTARY	AuSphericalDoubleMonomerPDT/Mel	Gram+GIT
72	0	0	2.6575e-11	0	0.5	0	0.265817	Au	MBC (uM)	324.928	Staphylococcus aureus	ATCC6538P	Spherical	1	PDT/Mel	Double	Monomer	4	CJ	Gram-	GIT	0	1	0	0	t	0.447154	-0.002	0	0.122397	0.0791961	0.0807547	-0.144067	-0.119627	-0.149464	-0.0932875	-0.000709045	-0.000709045	196.967	10.2	2.54	6.1	1.8	24	SC1=NC(N)=CC(N)=N1.c1(nc(nc(n1)N)N)N	J. Am. Chem. Soc. 2013 135 (35) 12940â€“12943"	COMPLEMENTARY	AuSphericalDoubleMonomerPDT/Mel	Gram-GIT
73	0	0	4.41749e-11	0	0.5	0	0.265835	Au	MBC (uM)	324.928	Staphylococcus epidermidis	ATCC12228	Spherical	1	PDT/Mel	Double	Monomer	4	CJ	Gram-	GIT	0	1	0	0	t	0.447154	-0.002	0	0.122397	0.0791961	0.0807547	-0.142944	-0.119615	-0.149459	-0.0932976	-0.00074392	-0.00074392	196.967	10.2	2.54	6.1	1.8	24	SC1=NC(N)=CC(N)=N1.c1(nc(nc(n1)N)N)N	J. Am. Chem. Soc. 2013 135 (35) 12940â€“12943"	COMPLEMENTARY	AuSphericalDoubleMonomerPDT/Mel	Gram-GIT
73	0	0	0.29419	0	0.5	0	0.270991	Au	MBC (uM)	324.928	Staphylococcus epidermidis	ATCC12228	Spherical	1	PDT/Mel	Double	Monomer	25	TY	Gram+	SYS	0	1	0	0	t	0.447154	-0.0005	-0.0005	0.10259	0.0124517	0.0135345	-0.142944	-0.119615	-0.149459	-0.0932976	-0.00074392	-0.00074392	196.967	10.2	2.54	6.1	1.8	24	SC1=NC(N)=CC(N)=N1.c1(nc(nc(n1)N)N)N	J. Am. Chem. Soc. 2013 135 (35) 12940â€“12943"	COMPLEMENTARY	AuSphericalDoubleMonomerPDT/Mel	Gram+SYS
73	0	0	1.54298e-14	0	0.5	0	0.264417	Au	MBC (uM)	324.928	Staphylococcus epidermidis	ATCC12228	Spherical	1	PDT/Mel	Double	Monomer	6	CT	Gram-	SYS	0	1	0	0	t	0.447154	0.00457143	0.00557143	0.129748	0.11685	0.11775	-0.142944	-0.119615	-0.149459	-0.0932976	-0.00074392	-0.00074392	196.967	10.2	2.54	6.1	1.8	24	SC1=NC(N)=CC(N)=N1.c1(nc(nc(n1)N)N)N	J. Am. Chem. Soc. 2013 135 (35) 12940â€“12943"	COMPLEMENTARY	AuSphericalDoubleMonomerPDT/Mel	Gram-SYS
73	0	0	0.097428	0	0.5	0	0.267764	Au	MBC (uM)	324.928	Staphylococcus epidermidis	ATCC12228	Spherical	1	PDT/Mel	Double	Monomer	16	MT	Gram-	RES	0	1	0	0	t	0.447154	-0.009	-0.01	0.0993988	0.0302842	0.0319897	-0.142944	-0.119615	-0.149459	-0.0932976	-0.00074392	-0.00074392	196.967	10.2	2.54	6.1	1.8	24	SC1=NC(N)=CC(N)=N1.c1(nc(nc(n1)N)N)N	J. Am. Chem. Soc. 2013 135 (35) 12940â€“12943"	COMPLEMENTARY	AuSphericalDoubleMonomerPDT/Mel	Gram-RES
73	0	0	0.29419	0	0.5	0	0.270991	Au	MBC (uM)	324.928	Staphylococcus epidermidis	ATCC12228	Spherical	1	PDT/Mel	Double	Monomer	25	TY	Gram+	SYS	0	1	0	0	t	0.447154	-0.0005	-0.0005	0.10259	0.0124517	0.0135345	-0.142944	-0.119615	-0.149459	-0.0932976	-0.00074392	-0.00074392	196.967	10.2	2.54	6.1	1.8	24	SC1=NC(N)=CC(N)=N1.c1(nc(nc(n1)N)N)N	J. Am. Chem. Soc. 2013 135 (35) 12940â€“12943"	COMPLEMENTARY	AuSphericalDoubleMonomerPDT/Mel	Gram+SYS
73	0	0	1.63155e-09	0	0.5	0	0.266874	Au	MBC (uM)	324.928	Staphylococcus epidermidis	ATCC12228	Spherical	1	PDT/Mel	Double	Monomer	24	ST	Gram+	RES	0	1	0	0	t	0.447154	0.00133333	0.00233333	0.124568	0.0735856	0.0748657	-0.142944	-0.119615	-0.149459	-0.0932976	-0.00074392	-0.00074392	196.967	10.2	2.54	6.1	1.8	24	SC1=NC(N)=CC(N)=N1.c1(nc(nc(n1)N)N)N	J. Am. Chem. Soc. 2013 135 (35) 12940â€“12943"	COMPLEMENTARY	AuSphericalDoubleMonomerPDT/Mel	Gram+RES
73	0	0	0.0269321	0	0.5	0	0.269099	Au	MBC (uM)	324.928	Staphylococcus epidermidis	ATCC12228	Spherical	1	PDT/Mel	Double	Monomer	10	HI	Gram-	SYS	0	1	0	0	t	0.447154	0.00357143	0.000571429	0.114325	0.0458025	0.0470383	-0.142944	-0.119615	-0.149459	-0.0932976	-0.00074392	-0.00074392	196.967	10.2	2.54	6.1	1.8	24	SC1=NC(N)=CC(N)=N1.c1(nc(nc(n1)N)N)N	J. Am. Chem. Soc. 2013 135 (35) 12940â€“12943"	COMPLEMENTARY	AuSphericalDoubleMonomerPDT/Mel	Gram-SYS
73	0	0	4.41749e-11	0	0.5	0	0.265835	Au	MBC (uM)	324.928	Staphylococcus epidermidis	ATCC12228	Spherical	1	PDT/Mel	Double	Monomer	4	CJ	Gram-	GIT	0	1	0	0	t	0.447154	-0.002	0	0.122397	0.0791961	0.0807547	-0.142944	-0.119615	-0.149459	-0.0932976	-0.00074392	-0.00074392	196.967	10.2	2.54	6.1	1.8	24	SC1=NC(N)=CC(N)=N1.c1(nc(nc(n1)N)N)N	J. Am. Chem. Soc. 2013 135 (35) 12940â€“12943"	COMPLEMENTARY	AuSphericalDoubleMonomerPDT/Mel	Gram-GIT
73	0	0	3.31101e-11	0	0.5	0	0.265925	Au	MBC (uM)	324.928	Staphylococcus epidermidis	ATCC12228	Spherical	1	PDT/Mel	Double	Monomer	9	EF	Gram+	GIT	0	1	0	0	t	0.447154	-0.004	-0.001	0.122096	0.0733832	0.0748523	-0.142944	-0.119615	-0.149459	-0.0932976	-0.00074392	-0.00074392	196.967	10.2	2.54	6.1	1.8	24	SC1=NC(N)=CC(N)=N1.c1(nc(nc(n1)N)N)N	J. Am. Chem. Soc. 2013 135 (35) 12940â€“12943"	COMPLEMENTARY	AuSphericalDoubleMonomerPDT/Mel	Gram+GIT
74	0	0	0.097428	0	0.5	0	0.267764	Au	MBC (uM)	324.928	Enterococcus faecium	MDR	Spherical	1	PDT/Mel	Double	Monomer	16	MT	Gram-	RES	0	1	0	0	t	0.447154	-0.009	-0.01	0.0993988	0.0302842	0.0319897	-0.142944	-0.119615	-0.149459	-0.0932976	-0.00074392	-0.00074392	196.967	10.2	2.54	6.1	1.8	24	SC1=NC(N)=CC(N)=N1.c1(nc(nc(n1)N)N)N	J. Am. Chem. Soc. 2013 135 (35) 12940â€“12943"	COMPLEMENTARY	AuSphericalDoubleMonomerPDT/Mel	Gram-RES
74	0	0	3.31101e-11	0	0.5	0	0.265925	Au	MBC (uM)	324.928	Enterococcus faecium	MDR	Spherical	1	PDT/Mel	Double	Monomer	9	EF	Gram+	GIT	0	1	0	0	t	0.447154	-0.004	-0.001	0.122096	0.0733832	0.0748523	-0.142944	-0.119615	-0.149459	-0.0932976	-0.00074392	-0.00074392	196.967	10.2	2.54	6.1	1.8	24	SC1=NC(N)=CC(N)=N1.c1(nc(nc(n1)N)N)N	J. Am. Chem. Soc. 2013 135 (35) 12940â€“12943"	COMPLEMENTARY	AuSphericalDoubleMonomerPDT/Mel	Gram+GIT
74	0	0	4.41749e-11	0	0.5	0	0.265835	Au	MBC (uM)	324.928	Enterococcus faecium	MDR	Spherical	1	PDT/Mel	Double	Monomer	4	CJ	Gram-	GIT	0	1	0	0	t	0.447154	-0.002	0	0.122397	0.0791961	0.0807547	-0.142944	-0.119615	-0.149459	-0.0932976	-0.00074392	-0.00074392	196.967	10.2	2.54	6.1	1.8	24	SC1=NC(N)=CC(N)=N1.c1(nc(nc(n1)N)N)N	J. Am. Chem. Soc. 2013 135 (35) 12940â€“12943"	COMPLEMENTARY	AuSphericalDoubleMonomerPDT/Mel	Gram-GIT
74	0	0	0.0269321	0	0.5	0	0.269099	Au	MBC (uM)	324.928	Enterococcus faecium	MDR	Spherical	1	PDT/Mel	Double	Monomer	10	HI	Gram-	SYS	0	1	0	0	t	0.447154	0.00357143	0.000571429	0.114325	0.0458025	0.0470383	-0.142944	-0.119615	-0.149459	-0.0932976	-0.00074392	-0.00074392	196.967	10.2	2.54	6.1	1.8	24	SC1=NC(N)=CC(N)=N1.c1(nc(nc(n1)N)N)N	J. Am. Chem. Soc. 2013 135 (35) 12940â€“12943"	COMPLEMENTARY	AuSphericalDoubleMonomerPDT/Mel	Gram-SYS
74	0	0	0.29419	0	0.5	0	0.270991	Au	MBC (uM)	324.928	Enterococcus faecium	MDR	Spherical	1	PDT/Mel	Double	Monomer	25	TY	Gram+	SYS	0	1	0	0	t	0.447154	-0.0005	-0.0005	0.10259	0.0124517	0.0135345	-0.142944	-0.119615	-0.149459	-0.0932976	-0.00074392	-0.00074392	196.967	10.2	2.54	6.1	1.8	24	SC1=NC(N)=CC(N)=N1.c1(nc(nc(n1)N)N)N	J. Am. Chem. Soc. 2013 135 (35) 12940â€“12943"	COMPLEMENTARY	AuSphericalDoubleMonomerPDT/Mel	Gram+SYS
74	0	0	1.63155e-09	0	0.5	0	0.266874	Au	MBC (uM)	324.928	Enterococcus faecium	MDR	Spherical	1	PDT/Mel	Double	Monomer	24	ST	Gram+	RES	0	1	0	0	t	0.447154	0.00133333	0.00233333	0.124568	0.0735856	0.0748657	-0.142944	-0.119615	-0.149459	-0.0932976	-0.00074392	-0.00074392	196.967	10.2	2.54	6.1	1.8	24	SC1=NC(N)=CC(N)=N1.c1(nc(nc(n1)N)N)N	J. Am. Chem. Soc. 2013 135 (35) 12940â€“12943"	COMPLEMENTARY	AuSphericalDoubleMonomerPDT/Mel	Gram+RES
74	0	0	1.54298e-14	0	0.5	0	0.264417	Au	MBC (uM)	324.928	Enterococcus faecium	MDR	Spherical	1	PDT/Mel	Double	Monomer	6	CT	Gram-	SYS	0	1	0	0	t	0.447154	0.00457143	0.00557143	0.129748	0.11685	0.11775	-0.142944	-0.119615	-0.149459	-0.0932976	-0.00074392	-0.00074392	196.967	10.2	2.54	6.1	1.8	24	SC1=NC(N)=CC(N)=N1.c1(nc(nc(n1)N)N)N	J. Am. Chem. Soc. 2013 135 (35) 12940â€“12943"	COMPLEMENTARY	AuSphericalDoubleMonomerPDT/Mel	Gram-SYS
75	0	0	1.86186e-11	0	0.5	0	0.265373	Au	MBC (uM)	324.928	Staphylococcus aureus	ATCC6538P	Spherical	2	PDT/ACh	Double	Monomer	4	CJ	Gram-	GIT	0	1	0	0	t	0.447154	-0.002	0	0.122397	0.0791961	0.0807547	-0.144067	-0.119627	-0.149464	-0.109216	-0.000709045	-0.000709045	196.967	10.2	2.54	6.1	2.2	24	SC1=NC(N)=CC(N)=N1.CC(=O)OCC[N+](C)(C)C	J. Am. Chem. Soc. 2013 135 (35) 12940â€“12943"	COMPLEMENTARY	AuSphericalDoubleMonomerPDT/ACh	Gram-GIT
75	0	0	0.0435162	0	0.5	0	0.267292	Au	MBC (uM)	324.928	Staphylococcus aureus	ATCC6538P	Spherical	2	PDT/ACh	Double	Monomer	16	MT	Gram-	RES	0	1	0	0	t	0.447154	-0.009	-0.01	0.0993988	0.0302842	0.0319897	-0.144067	-0.119627	-0.149464	-0.109216	-0.000709045	-0.000709045	196.967	10.2	2.54	6.1	2.2	24	SC1=NC(N)=CC(N)=N1.CC(=O)OCC[N+](C)(C)C	J. Am. Chem. Soc. 2013 135 (35) 12940â€“12943"	COMPLEMENTARY	AuSphericalDoubleMonomerPDT/ACh	Gram-RES
75	0	0	6.5033e-15	0	0.5	0	0.263964	Au	MBC (uM)	324.928	Staphylococcus aureus	ATCC6538P	Spherical	2	PDT/ACh	Double	Monomer	6	CT	Gram-	SYS	0	1	0	0	t	0.447154	0.00457143	0.00557143	0.129748	0.11685	0.11775	-0.144067	-0.119627	-0.149464	-0.109216	-0.000709045	-0.000709045	196.967	10.2	2.54	6.1	2.2	24	SC1=NC(N)=CC(N)=N1.CC(=O)OCC[N+](C)(C)C	J. Am. Chem. Soc. 2013 135 (35) 12940â€“12943"	COMPLEMENTARY	AuSphericalDoubleMonomerPDT/ACh	Gram-SYS
75	0	0	0.149426	0	0.5	0	0.270513	Au	MBC (uM)	324.928	Staphylococcus aureus	ATCC6538P	Spherical	2	PDT/ACh	Double	Monomer	25	TY	Gram+	SYS	0	1	0	0	t	0.447154	-0.0005	-0.0005	0.10259	0.0124517	0.0135345	-0.144067	-0.119627	-0.149464	-0.109216	-0.000709045	-0.000709045	196.967	10.2	2.54	6.1	2.2	24	SC1=NC(N)=CC(N)=N1.CC(=O)OCC[N+](C)(C)C	J. Am. Chem. Soc. 2013 135 (35) 12940â€“12943"	COMPLEMENTARY	AuSphericalDoubleMonomerPDT/ACh	Gram+SYS
75	0	0	6.87658e-10	0	0.5	0	0.26641	Au	MBC (uM)	324.928	Staphylococcus aureus	ATCC6538P	Spherical	2	PDT/ACh	Double	Monomer	24	ST	Gram+	RES	0	1	0	0	t	0.447154	0.00133333	0.00233333	0.124568	0.0735856	0.0748657	-0.144067	-0.119627	-0.149464	-0.109216	-0.000709045	-0.000709045	196.967	10.2	2.54	6.1	2.2	24	SC1=NC(N)=CC(N)=N1.CC(=O)OCC[N+](C)(C)C	J. Am. Chem. Soc. 2013 135 (35) 12940â€“12943"	COMPLEMENTARY	AuSphericalDoubleMonomerPDT/ACh	Gram+RES
75	0	0	0.0115309	0	0.5	0	0.268628	Au	MBC (uM)	324.928	Staphylococcus aureus	ATCC6538P	Spherical	2	PDT/ACh	Double	Monomer	10	HI	Gram-	SYS	0	1	0	0	t	0.447154	0.00357143	0.000571429	0.114325	0.0458025	0.0470383	-0.144067	-0.119627	-0.149464	-0.109216	-0.000709045	-0.000709045	196.967	10.2	2.54	6.1	2.2	24	SC1=NC(N)=CC(N)=N1.CC(=O)OCC[N+](C)(C)C	J. Am. Chem. Soc. 2013 135 (35) 12940â€“12943"	COMPLEMENTARY	AuSphericalDoubleMonomerPDT/ACh	Gram-SYS
75	0	0	1.39551e-11	0	0.5	0	0.265462	Au	MBC (uM)	324.928	Staphylococcus aureus	ATCC6538P	Spherical	2	PDT/ACh	Double	Monomer	9	EF	Gram+	GIT	0	1	0	0	t	0.447154	-0.004	-0.001	0.122096	0.0733832	0.0748523	-0.144067	-0.119627	-0.149464	-0.109216	-0.000709045	-0.000709045	196.967	10.2	2.54	6.1	2.2	24	SC1=NC(N)=CC(N)=N1.CC(=O)OCC[N+](C)(C)C	J. Am. Chem. Soc. 2013 135 (35) 12940â€“12943"	COMPLEMENTARY	AuSphericalDoubleMonomerPDT/ACh	Gram+GIT
75	0	0	1.86186e-11	0	0.5	0	0.265373	Au	MBC (uM)	324.928	Staphylococcus aureus	ATCC6538P	Spherical	2	PDT/ACh	Double	Monomer	4	CJ	Gram-	GIT	0	1	0	0	t	0.447154	-0.002	0	0.122397	0.0791961	0.0807547	-0.144067	-0.119627	-0.149464	-0.109216	-0.000709045	-0.000709045	196.967	10.2	2.54	6.1	2.2	24	SC1=NC(N)=CC(N)=N1.CC(=O)OCC[N+](C)(C)C	J. Am. Chem. Soc. 2013 135 (35) 12940â€“12943"	COMPLEMENTARY	AuSphericalDoubleMonomerPDT/ACh	Gram-GIT
76	0	0	3.09492e-11	0	0.5	0	0.265391	Au	MBC (uM)	324.928	Staphylococcus epidermidis	ATCC12228	Spherical	2	PDT/ACh	Double	Monomer	4	CJ	Gram-	GIT	0	1	0	0	t	0.447154	-0.002	0	0.122397	0.0791961	0.0807547	-0.142944	-0.119615	-0.149459	-0.109226	-0.00074392	-0.00074392	196.967	10.2	2.54	6.1	2.2	24	SC1=NC(N)=CC(N)=N1.CC(=O)OCC[N+](C)(C)C	J. Am. Chem. Soc. 2013 135 (35) 12940â€“12943"	COMPLEMENTARY	AuSphericalDoubleMonomerPDT/ACh	Gram-GIT
76	0	0	1.08102e-14	0	0.5	0	0.263982	Au	MBC (uM)	324.928	Staphylococcus epidermidis	ATCC12228	Spherical	2	PDT/ACh	Double	Monomer	6	CT	Gram-	SYS	0	1	0	0	t	0.447154	0.00457143	0.00557143	0.129748	0.11685	0.11775	-0.142944	-0.119615	-0.149459	-0.109226	-0.00074392	-0.00074392	196.967	10.2	2.54	6.1	2.2	24	SC1=NC(N)=CC(N)=N1.CC(=O)OCC[N+](C)(C)C	J. Am. Chem. Soc. 2013 135 (35) 12940â€“12943"	COMPLEMENTARY	AuSphericalDoubleMonomerPDT/ACh	Gram-SYS
76	0	0	0.0703096	0	0.5	0	0.26731	Au	MBC (uM)	324.928	Staphylococcus epidermidis	ATCC12228	Spherical	2	PDT/ACh	Double	Monomer	16	MT	Gram-	RES	0	1	0	0	t	0.447154	-0.009	-0.01	0.0993988	0.0302842	0.0319897	-0.142944	-0.119615	-0.149459	-0.109226	-0.00074392	-0.00074392	196.967	10.2	2.54	6.1	2.2	24	SC1=NC(N)=CC(N)=N1.CC(=O)OCC[N+](C)(C)C	J. Am. Chem. Soc. 2013 135 (35) 12940â€“12943"	COMPLEMENTARY	AuSphericalDoubleMonomerPDT/ACh	Gram-RES
76	0	0	0.226019	0	0.5	0	0.270531	Au	MBC (uM)	324.928	Staphylococcus epidermidis	ATCC12228	Spherical	2	PDT/ACh	Double	Monomer	25	TY	Gram+	SYS	0	1	0	0	t	0.447154	-0.0005	-0.0005	0.10259	0.0124517	0.0135345	-0.142944	-0.119615	-0.149459	-0.109226	-0.00074392	-0.00074392	196.967	10.2	2.54	6.1	2.2	24	SC1=NC(N)=CC(N)=N1.CC(=O)OCC[N+](C)(C)C	J. Am. Chem. Soc. 2013 135 (35) 12940â€“12943"	COMPLEMENTARY	AuSphericalDoubleMonomerPDT/ACh	Gram+SYS
76	0	0	0.0190222	0	0.5	0	0.268646	Au	MBC (uM)	324.928	Staphylococcus epidermidis	ATCC12228	Spherical	2	PDT/ACh	Double	Monomer	10	HI	Gram-	SYS	0	1	0	0	t	0.447154	0.00357143	0.000571429	0.114325	0.0458025	0.0470383	-0.142944	-0.119615	-0.149459	-0.109226	-0.00074392	-0.00074392	196.967	10.2	2.54	6.1	2.2	24	SC1=NC(N)=CC(N)=N1.CC(=O)OCC[N+](C)(C)C	J. Am. Chem. Soc. 2013 135 (35) 12940â€“12943"	COMPLEMENTARY	AuSphericalDoubleMonomerPDT/ACh	Gram-SYS
76	0	0	2.31972e-11	0	0.5	0	0.265479	Au	MBC (uM)	324.928	Staphylococcus epidermidis	ATCC12228	Spherical	2	PDT/ACh	Double	Monomer	9	EF	Gram+	GIT	0	1	0	0	t	0.447154	-0.004	-0.001	0.122096	0.0733832	0.0748523	-0.142944	-0.119615	-0.149459	-0.109226	-0.00074392	-0.00074392	196.967	10.2	2.54	6.1	2.2	24	SC1=NC(N)=CC(N)=N1.CC(=O)OCC[N+](C)(C)C	J. Am. Chem. Soc. 2013 135 (35) 12940â€“12943"	COMPLEMENTARY	AuSphericalDoubleMonomerPDT/ACh	Gram+GIT
77	0	0	0.155914	0	0.5	0	0.270513	Au	MBC (uM)	324.928	Staphylococcus aureus	MET-R	Spherical	2	PDT/ACh	Double	Monomer	25	TY	Gram+	SYS	0	1	0	0	t	0.447154	-0.0005	-0.0005	0.10259	0.0124517	0.0135345	-0.144019	-0.119614	-0.149465	-0.109208	-0.000401112	-0.000401112	196.967	10.2	2.54	6.1	2.2	24	SC1=NC(N)=CC(N)=N1.CC(=O)OCC[N+](C)(C)C	J. Am. Chem. Soc. 2013 135 (35) 12940â€“12943"	COMPLEMENTARY	AuSphericalDoubleMonomerPDT/ACh	Gram+SYS
77	0	0	0.0456527	0	0.5	0	0.267292	Au	MBC (uM)	324.928	Staphylococcus aureus	MET-R	Spherical	2	PDT/ACh	Double	Monomer	16	MT	Gram-	RES	0	1	0	0	t	0.447154	-0.009	-0.01	0.0993988	0.0302842	0.0319897	-0.144019	-0.119614	-0.149465	-0.109208	-0.000401112	-0.000401112	196.967	10.2	2.54	6.1	2.2	24	SC1=NC(N)=CC(N)=N1.CC(=O)OCC[N+](C)(C)C	J. Am. Chem. Soc. 2013 135 (35) 12940â€“12943"	COMPLEMENTARY	AuSphericalDoubleMonomerPDT/ACh	Gram-RES
77	0	0	1.95765e-11	0	0.5	0	0.265373	Au	MBC (uM)	324.928	Staphylococcus aureus	MET-R	Spherical	2	PDT/ACh	Double	Monomer	4	CJ	Gram-	GIT	0	1	0	0	t	0.447154	-0.002	0	0.122397	0.0791961	0.0807547	-0.144019	-0.119614	-0.149465	-0.109208	-0.000401112	-0.000401112	196.967	10.2	2.54	6.1	2.2	24	SC1=NC(N)=CC(N)=N1.CC(=O)OCC[N+](C)(C)C	J. Am. Chem. Soc. 2013 135 (35) 12940â€“12943"	COMPLEMENTARY	AuSphericalDoubleMonomerPDT/ACh	Gram-GIT
77	0	0	0.155914	0	0.5	0	0.270513	Au	MBC (uM)	324.928	Staphylococcus aureus	MET-R	Spherical	2	PDT/ACh	Double	Monomer	25	TY	Gram+	SYS	0	1	0	0	t	0.447154	-0.0005	-0.0005	0.10259	0.0124517	0.0135345	-0.144019	-0.119614	-0.149465	-0.109208	-0.000401112	-0.000401112	196.967	10.2	2.54	6.1	2.2	24	SC1=NC(N)=CC(N)=N1.CC(=O)OCC[N+](C)(C)C	J. Am. Chem. Soc. 2013 135 (35) 12940â€“12943"	COMPLEMENTARY	AuSphericalDoubleMonomerPDT/ACh	Gram+SYS
77	0	0	0.0121169	0	0.5	0	0.268628	Au	MBC (uM)	324.928	Staphylococcus aureus	MET-R	Spherical	2	PDT/ACh	Double	Monomer	10	HI	Gram-	SYS	0	1	0	0	t	0.447154	0.00357143	0.000571429	0.114325	0.0458025	0.0470383	-0.144019	-0.119614	-0.149465	-0.109208	-0.000401112	-0.000401112	196.967	10.2	2.54	6.1	2.2	24	SC1=NC(N)=CC(N)=N1.CC(=O)OCC[N+](C)(C)C	J. Am. Chem. Soc. 2013 135 (35) 12940â€“12943"	COMPLEMENTARY	AuSphericalDoubleMonomerPDT/ACh	Gram-SYS
77	0	0	1.4673e-11	0	0.5	0	0.265462	Au	MBC (uM)	324.928	Staphylococcus aureus	MET-R	Spherical	2	PDT/ACh	Double	Monomer	9	EF	Gram+	GIT	0	1	0	0	t	0.447154	-0.004	-0.001	0.122096	0.0733832	0.0748523	-0.144019	-0.119614	-0.149465	-0.109208	-0.000401112	-0.000401112	196.967	10.2	2.54	6.1	2.2	24	SC1=NC(N)=CC(N)=N1.CC(=O)OCC[N+](C)(C)C	J. Am. Chem. Soc. 2013 135 (35) 12940â€“12943"	COMPLEMENTARY	AuSphericalDoubleMonomerPDT/ACh	Gram+GIT
77	0	0	6.83785e-15	0	0.5	0	0.263964	Au	MBC (uM)	324.928	Staphylococcus aureus	MET-R	Spherical	2	PDT/ACh	Double	Monomer	6	CT	Gram-	SYS	0	1	0	0	t	0.447154	0.00457143	0.00557143	0.129748	0.11685	0.11775	-0.144019	-0.119614	-0.149465	-0.109208	-0.000401112	-0.000401112	196.967	10.2	2.54	6.1	2.2	24	SC1=NC(N)=CC(N)=N1.CC(=O)OCC[N+](C)(C)C	J. Am. Chem. Soc. 2013 135 (35) 12940â€“12943"	COMPLEMENTARY	AuSphericalDoubleMonomerPDT/ACh	Gram-SYS
78	0	0	0.0703096	0	0.5	0	0.26731	Au	MBC (uM)	324.928	Enterococcus faecium	MDR	Spherical	2	PDT/ACh	Double	Monomer	16	MT	Gram-	RES	0	1	0	0	t	0.447154	-0.009	-0.01	0.0993988	0.0302842	0.0319897	-0.142944	-0.119615	-0.149459	-0.109226	-0.00074392	-0.00074392	196.967	10.2	2.54	6.1	2.2	24	SC1=NC(N)=CC(N)=N1.CC(=O)OCC[N+](C)(C)C	J. Am. Chem. Soc. 2013 135 (35) 12940â€“12943"	COMPLEMENTARY	AuSphericalDoubleMonomerPDT/ACh	Gram-RES
78	0	0	2.31972e-11	0	0.5	0	0.265479	Au	MBC (uM)	324.928	Enterococcus faecium	MDR	Spherical	2	PDT/ACh	Double	Monomer	9	EF	Gram+	GIT	0	1	0	0	t	0.447154	-0.004	-0.001	0.122096	0.0733832	0.0748523	-0.142944	-0.119615	-0.149459	-0.109226	-0.00074392	-0.00074392	196.967	10.2	2.54	6.1	2.2	24	SC1=NC(N)=CC(N)=N1.CC(=O)OCC[N+](C)(C)C	J. Am. Chem. Soc. 2013 135 (35) 12940â€“12943"	COMPLEMENTARY	AuSphericalDoubleMonomerPDT/ACh	Gram+GIT
78	0	0	1.14308e-09	0	0.5	0	0.266427	Au	MBC (uM)	324.928	Enterococcus faecium	MDR	Spherical	2	PDT/ACh	Double	Monomer	24	ST	Gram+	RES	0	1	0	0	t	0.447154	0.00133333	0.00233333	0.124568	0.0735856	0.0748657	-0.142944	-0.119615	-0.149459	-0.109226	-0.00074392	-0.00074392	196.967	10.2	2.54	6.1	2.2	24	SC1=NC(N)=CC(N)=N1.CC(=O)OCC[N+](C)(C)C	J. Am. Chem. Soc. 2013 135 (35) 12940â€“12943"	COMPLEMENTARY	AuSphericalDoubleMonomerPDT/ACh	Gram+RES
78	0	0	3.09492e-11	0	0.5	0	0.265391	Au	MBC (uM)	324.928	Enterococcus faecium	MDR	Spherical	2	PDT/ACh	Double	Monomer	4	CJ	Gram-	GIT	0	1	0	0	t	0.447154	-0.002	0	0.122397	0.0791961	0.0807547	-0.142944	-0.119615	-0.149459	-0.109226	-0.00074392	-0.00074392	196.967	10.2	2.54	6.1	2.2	24	SC1=NC(N)=CC(N)=N1.CC(=O)OCC[N+](C)(C)C	J. Am. Chem. Soc. 2013 135 (35) 12940â€“12943"	COMPLEMENTARY	AuSphericalDoubleMonomerPDT/ACh	Gram-GIT
78	0	0	0.226019	0	0.5	0	0.270531	Au	MBC (uM)	324.928	Enterococcus faecium	MDR	Spherical	2	PDT/ACh	Double	Monomer	25	TY	Gram+	SYS	0	1	0	0	t	0.447154	-0.0005	-0.0005	0.10259	0.0124517	0.0135345	-0.142944	-0.119615	-0.149459	-0.109226	-0.00074392	-0.00074392	196.967	10.2	2.54	6.1	2.2	24	SC1=NC(N)=CC(N)=N1.CC(=O)OCC[N+](C)(C)C	J. Am. Chem. Soc. 2013 135 (35) 12940â€“12943"	COMPLEMENTARY	AuSphericalDoubleMonomerPDT/ACh	Gram+SYS
79	0	0	0.0470004	0	0.5	0	0.267395	Au	MBC (uM)	324.928	Staphylococcus aureus	ATCC6538P	Spherical	3	PDT/CQ	Double	Monomer	16	MT	Gram-	RES	0	1	0	0	t	0.447154	-0.009	-0.01	0.0993988	0.0302842	0.0319897	-0.144067	-0.119627	-0.149464	-0.105604	-0.000709045	-0.000709045	196.967	10.2	2.54	6.1	2.1	24	SC1=NC(N)=CC(N)=N1.Clc1cc2nccc(c2cc1)NC(C)CCCN(CC)CC	J. Am. Chem. Soc. 2013 135 (35) 12940â€“12943"	COMPLEMENTARY	AuSphericalDoubleMonomerPDT/CQ	Gram-RES
79	0	0	7.04967e-15	0	0.5	0	0.264063	Au	MBC (uM)	324.928	Staphylococcus aureus	ATCC6538P	Spherical	3	PDT/CQ	Double	Monomer	6	CT	Gram-	SYS	0	1	0	0	t	0.447154	0.00457143	0.00557143	0.129748	0.11685	0.11775	-0.144067	-0.119627	-0.149464	-0.105604	-0.000709045	-0.000709045	196.967	10.2	2.54	6.1	2.1	24	SC1=NC(N)=CC(N)=N1.Clc1cc2nccc(c2cc1)NC(C)CCCN(CC)CC	J. Am. Chem. Soc. 2013 135 (35) 12940â€“12943"	COMPLEMENTARY	AuSphericalDoubleMonomerPDT/CQ	Gram-SYS
79	0	0	0.159971	0	0.5	0	0.270618	Au	MBC (uM)	324.928	Staphylococcus aureus	ATCC6538P	Spherical	3	PDT/CQ	Double	Monomer	25	TY	Gram+	SYS	0	1	0	0	t	0.447154	-0.0005	-0.0005	0.10259	0.0124517	0.0135345	-0.144067	-0.119627	-0.149464	-0.105604	-0.000709045	-0.000709045	196.967	10.2	2.54	6.1	2.1	24	SC1=NC(N)=CC(N)=N1.Clc1cc2nccc(c2cc1)NC(C)CCCN(CC)CC	J. Am. Chem. Soc. 2013 135 (35) 12940â€“12943"	COMPLEMENTARY	AuSphericalDoubleMonomerPDT/CQ	Gram+SYS
79	0	0	7.45431e-10	0	0.5	0	0.266511	Au	MBC (uM)	324.928	Staphylococcus aureus	ATCC6538P	Spherical	3	PDT/CQ	Double	Monomer	24	ST	Gram+	RES	0	1	0	0	t	0.447154	0.00133333	0.00233333	0.124568	0.0735856	0.0748657	-0.144067	-0.119627	-0.149464	-0.105604	-0.000709045	-0.000709045	196.967	10.2	2.54	6.1	2.1	24	SC1=NC(N)=CC(N)=N1.Clc1cc2nccc(c2cc1)NC(C)CCCN(CC)CC	J. Am. Chem. Soc. 2013 135 (35) 12940â€“12943"	COMPLEMENTARY	AuSphericalDoubleMonomerPDT/CQ	Gram+RES
79	0	0	0.0124875	0	0.5	0	0.26873	Au	MBC (uM)	324.928	Staphylococcus aureus	ATCC6538P	Spherical	3	PDT/CQ	Double	Monomer	10	HI	Gram-	SYS	0	1	0	0	t	0.447154	0.00357143	0.000571429	0.114325	0.0458025	0.0470383	-0.144067	-0.119627	-0.149464	-0.105604	-0.000709045	-0.000709045	196.967	10.2	2.54	6.1	2.1	24	SC1=NC(N)=CC(N)=N1.Clc1cc2nccc(c2cc1)NC(C)CCCN(CC)CC	J. Am. Chem. Soc. 2013 135 (35) 12940â€“12943"	COMPLEMENTARY	AuSphericalDoubleMonomerPDT/CQ	Gram-SYS
79	0	0	1.51275e-11	0	0.5	0	0.265563	Au	MBC (uM)	324.928	Staphylococcus aureus	ATCC6538P	Spherical	3	PDT/CQ	Double	Monomer	9	EF	Gram+	GIT	0	1	0	0	t	0.447154	-0.004	-0.001	0.122096	0.0733832	0.0748523	-0.144067	-0.119627	-0.149464	-0.105604	-0.000709045	-0.000709045	196.967	10.2	2.54	6.1	2.1	24	SC1=NC(N)=CC(N)=N1.Clc1cc2nccc(c2cc1)NC(C)CCCN(CC)CC	J. Am. Chem. Soc. 2013 135 (35) 12940â€“12943"	COMPLEMENTARY	AuSphericalDoubleMonomerPDT/CQ	Gram+GIT
79	0	0	2.01829e-11	0	0.5	0	0.265474	Au	MBC (uM)	324.928	Staphylococcus aureus	ATCC6538P	Spherical	3	PDT/CQ	Double	Monomer	4	CJ	Gram-	GIT	0	1	0	0	t	0.447154	-0.002	0	0.122397	0.0791961	0.0807547	-0.144067	-0.119627	-0.149464	-0.105604	-0.000709045	-0.000709045	196.967	10.2	2.54	6.1	2.1	24	SC1=NC(N)=CC(N)=N1.Clc1cc2nccc(c2cc1)NC(C)CCCN(CC)CC	J. Am. Chem. Soc. 2013 135 (35) 12940â€“12943"	COMPLEMENTARY	AuSphericalDoubleMonomerPDT/CQ	Gram-GIT
80	0	0	0.166828	0	0.5	0	0.270617	Au	MBC (uM)	324.928	Staphylococcus aureus	MET-R	Spherical	3	PDT/CQ	Double	Monomer	25	TY	Gram+	SYS	0	1	0	0	t	0.447154	-0.0005	-0.0005	0.10259	0.0124517	0.0135345	-0.144019	-0.119614	-0.149465	-0.105597	-0.000401112	-0.000401112	196.967	10.2	2.54	6.1	2.1	24	SC1=NC(N)=CC(N)=N1.Clc1cc2nccc(c2cc1)NC(C)CCCN(CC)CC	J. Am. Chem. Soc. 2013 135 (35) 12940â€“12943"	COMPLEMENTARY	AuSphericalDoubleMonomerPDT/CQ	Gram+SYS
80	0	0	0.0492991	0	0.5	0	0.267395	Au	MBC (uM)	324.928	Staphylococcus aureus	MET-R	Spherical	3	PDT/CQ	Double	Monomer	16	MT	Gram-	RES	0	1	0	0	t	0.447154	-0.009	-0.01	0.0993988	0.0302842	0.0319897	-0.144019	-0.119614	-0.149465	-0.105597	-0.000401112	-0.000401112	196.967	10.2	2.54	6.1	2.1	24	SC1=NC(N)=CC(N)=N1.Clc1cc2nccc(c2cc1)NC(C)CCCN(CC)CC	J. Am. Chem. Soc. 2013 135 (35) 12940â€“12943"	COMPLEMENTARY	AuSphericalDoubleMonomerPDT/CQ	Gram-RES
80	0	0	2.12212e-11	0	0.5	0	0.265473	Au	MBC (uM)	324.928	Staphylococcus aureus	MET-R	Spherical	3	PDT/CQ	Double	Monomer	4	CJ	Gram-	GIT	0	1	0	0	t	0.447154	-0.002	0	0.122397	0.0791961	0.0807547	-0.144019	-0.119614	-0.149465	-0.105597	-0.000401112	-0.000401112	196.967	10.2	2.54	6.1	2.1	24	SC1=NC(N)=CC(N)=N1.Clc1cc2nccc(c2cc1)NC(C)CCCN(CC)CC	J. Am. Chem. Soc. 2013 135 (35) 12940â€“12943"	COMPLEMENTARY	AuSphericalDoubleMonomerPDT/CQ	Gram-GIT
80	0	0	0.166828	0	0.5	0	0.270617	Au	MBC (uM)	324.928	Staphylococcus aureus	MET-R	Spherical	3	PDT/CQ	Double	Monomer	25	TY	Gram+	SYS	0	1	0	0	t	0.447154	-0.0005	-0.0005	0.10259	0.0124517	0.0135345	-0.144019	-0.119614	-0.149465	-0.105597	-0.000401112	-0.000401112	196.967	10.2	2.54	6.1	2.1	24	SC1=NC(N)=CC(N)=N1.Clc1cc2nccc(c2cc1)NC(C)CCCN(CC)CC	J. Am. Chem. Soc. 2013 135 (35) 12940â€“12943"	COMPLEMENTARY	AuSphericalDoubleMonomerPDT/CQ	Gram+SYS
80	0	0	7.83779e-10	0	0.5	0	0.266511	Au	MBC (uM)	324.928	Staphylococcus aureus	MET-R	Spherical	3	PDT/CQ	Double	Monomer	24	ST	Gram+	RES	0	1	0	0	t	0.447154	0.00133333	0.00233333	0.124568	0.0735856	0.0748657	-0.144019	-0.119614	-0.149465	-0.105597	-0.000401112	-0.000401112	196.967	10.2	2.54	6.1	2.1	24	SC1=NC(N)=CC(N)=N1.Clc1cc2nccc(c2cc1)NC(C)CCCN(CC)CC	J. Am. Chem. Soc. 2013 135 (35) 12940â€“12943"	COMPLEMENTARY	AuSphericalDoubleMonomerPDT/CQ	Gram+RES
80	0	0	1.59058e-11	0	0.5	0	0.265562	Au	MBC (uM)	324.928	Staphylococcus aureus	MET-R	Spherical	3	PDT/CQ	Double	Monomer	9	EF	Gram+	GIT	0	1	0	0	t	0.447154	-0.004	-0.001	0.122096	0.0733832	0.0748523	-0.144019	-0.119614	-0.149465	-0.105597	-0.000401112	-0.000401112	196.967	10.2	2.54	6.1	2.1	24	SC1=NC(N)=CC(N)=N1.Clc1cc2nccc(c2cc1)NC(C)CCCN(CC)CC	J. Am. Chem. Soc. 2013 135 (35) 12940â€“12943"	COMPLEMENTARY	AuSphericalDoubleMonomerPDT/CQ	Gram+GIT
80	0	0	0.0131215	0	0.5	0	0.26873	Au	MBC (uM)	324.928	Staphylococcus aureus	MET-R	Spherical	3	PDT/CQ	Double	Monomer	10	HI	Gram-	SYS	0	1	0	0	t	0.447154	0.00357143	0.000571429	0.114325	0.0458025	0.0470383	-0.144019	-0.119614	-0.149465	-0.105597	-0.000401112	-0.000401112	196.967	10.2	2.54	6.1	2.1	24	SC1=NC(N)=CC(N)=N1.Clc1cc2nccc(c2cc1)NC(C)CCCN(CC)CC	J. Am. Chem. Soc. 2013 135 (35) 12940â€“12943"	COMPLEMENTARY	AuSphericalDoubleMonomerPDT/CQ	Gram-SYS
81	0	0	0.075769	0	0.5	0	0.267413	Au	MBC (uM)	324.928	Enterococcus faecium	MDR	Spherical	3	PDT/CQ	Double	Monomer	16	MT	Gram-	RES	0	1	0	0	t	0.447154	-0.009	-0.01	0.0993988	0.0302842	0.0319897	-0.142944	-0.119615	-0.149459	-0.105615	-0.00074392	-0.00074392	196.967	10.2	2.54	6.1	2.1	24	SC1=NC(N)=CC(N)=N1.Clc1cc2nccc(c2cc1)NC(C)CCCN(CC)CC	J. Am. Chem. Soc. 2013 135 (35) 12940â€“12943"	COMPLEMENTARY	AuSphericalDoubleMonomerPDT/CQ	Gram-RES
81	0	0	2.51461e-11	0	0.5	0	0.26558	Au	MBC (uM)	324.928	Enterococcus faecium	MDR	Spherical	3	PDT/CQ	Double	Monomer	9	EF	Gram+	GIT	0	1	0	0	t	0.447154	-0.004	-0.001	0.122096	0.0733832	0.0748523	-0.142944	-0.119615	-0.149459	-0.105615	-0.00074392	-0.00074392	196.967	10.2	2.54	6.1	2.1	24	SC1=NC(N)=CC(N)=N1.Clc1cc2nccc(c2cc1)NC(C)CCCN(CC)CC	J. Am. Chem. Soc. 2013 135 (35) 12940â€“12943"	COMPLEMENTARY	AuSphericalDoubleMonomerPDT/CQ	Gram+GIT
81	0	0	1.23911e-09	0	0.5	0	0.266528	Au	MBC (uM)	324.928	Enterococcus faecium	MDR	Spherical	3	PDT/CQ	Double	Monomer	24	ST	Gram+	RES	0	1	0	0	t	0.447154	0.00133333	0.00233333	0.124568	0.0735856	0.0748657	-0.142944	-0.119615	-0.149459	-0.105615	-0.00074392	-0.00074392	196.967	10.2	2.54	6.1	2.1	24	SC1=NC(N)=CC(N)=N1.Clc1cc2nccc(c2cc1)NC(C)CCCN(CC)CC	J. Am. Chem. Soc. 2013 135 (35) 12940â€“12943"	COMPLEMENTARY	AuSphericalDoubleMonomerPDT/CQ	Gram+RES
81	0	0	3.35494e-11	0	0.5	0	0.265491	Au	MBC (uM)	324.928	Enterococcus faecium	MDR	Spherical	3	PDT/CQ	Double	Monomer	4	CJ	Gram-	GIT	0	1	0	0	t	0.447154	-0.002	0	0.122397	0.0791961	0.0807547	-0.142944	-0.119615	-0.149459	-0.105615	-0.00074392	-0.00074392	196.967	10.2	2.54	6.1	2.1	24	SC1=NC(N)=CC(N)=N1.Clc1cc2nccc(c2cc1)NC(C)CCCN(CC)CC	J. Am. Chem. Soc. 2013 135 (35) 12940â€“12943"	COMPLEMENTARY	AuSphericalDoubleMonomerPDT/CQ	Gram-GIT
81	0	0	0.0205874	0	0.5	0	0.268748	Au	MBC (uM)	324.928	Enterococcus faecium	MDR	Spherical	3	PDT/CQ	Double	Monomer	10	HI	Gram-	SYS	0	1	0	0	t	0.447154	0.00357143	0.000571429	0.114325	0.0458025	0.0470383	-0.142944	-0.119615	-0.149459	-0.105615	-0.00074392	-0.00074392	196.967	10.2	2.54	6.1	2.1	24	SC1=NC(N)=CC(N)=N1.Clc1cc2nccc(c2cc1)NC(C)CCCN(CC)CC	J. Am. Chem. Soc. 2013 135 (35) 12940â€“12943"	COMPLEMENTARY	AuSphericalDoubleMonomerPDT/CQ	Gram-SYS
81	0	0	0.240442	0	0.5	0	0.270636	Au	MBC (uM)	324.928	Enterococcus faecium	MDR	Spherical	3	PDT/CQ	Double	Monomer	25	TY	Gram+	SYS	0	1	0	0	t	0.447154	-0.0005	-0.0005	0.10259	0.0124517	0.0135345	-0.142944	-0.119615	-0.149459	-0.105615	-0.00074392	-0.00074392	196.967	10.2	2.54	6.1	2.1	24	SC1=NC(N)=CC(N)=N1.Clc1cc2nccc(c2cc1)NC(C)CCCN(CC)CC	J. Am. Chem. Soc. 2013 135 (35) 12940â€“12943"	COMPLEMENTARY	AuSphericalDoubleMonomerPDT/CQ	Gram+SYS
81	0	0	1.17185e-14	0	0.5	0	0.26408	Au	MBC (uM)	324.928	Enterococcus faecium	MDR	Spherical	3	PDT/CQ	Double	Monomer	6	CT	Gram-	SYS	0	1	0	0	t	0.447154	0.00457143	0.00557143	0.129748	0.11685	0.11775	-0.142944	-0.119615	-0.149459	-0.105615	-0.00074392	-0.00074392	196.967	10.2	2.54	6.1	2.1	24	SC1=NC(N)=CC(N)=N1.Clc1cc2nccc(c2cc1)NC(C)CCCN(CC)CC	J. Am. Chem. Soc. 2013 135 (35) 12940â€“12943"	COMPLEMENTARY	AuSphericalDoubleMonomerPDT/CQ	Gram-SYS
82	0	0	0.124598	0	0.5	0	0.270242	Au	MBC (uM)	324.928	Staphylococcus aureus	ATCC6538P	Spherical	4	PDT/DMB	Double	Monomer	25	TY	Gram+	SYS	0	1	0	0	t	0.447154	-0.0005	-0.0005	0.10259	0.0124517	0.0135345	-0.144067	-0.119627	-0.149464	-0.118638	-0.000709045	-0.000709045	196.967	10.2	2.54	6.1	2.5	24	SC1=NC(N)=CC(N)=N1.CN(C(NC(N)=N)=N)C	J. Am. Chem. Soc. 2013 135 (35) 12940â€“12943"	COMPLEMENTARY	AuSphericalDoubleMonomerPDT/DMB	Gram+SYS
82	0	0	5.26895e-15	0	0.5	0	0.263708	Au	MBC (uM)	324.928	Staphylococcus aureus	ATCC6538P	Spherical	4	PDT/DMB	Double	Monomer	6	CT	Gram-	SYS	0	1	0	0	t	0.447154	0.00457143	0.00557143	0.129748	0.11685	0.11775	-0.144067	-0.119627	-0.149464	-0.118638	-0.000709045	-0.000709045	196.967	10.2	2.54	6.1	2.5	24	SC1=NC(N)=CC(N)=N1.CN(C(NC(N)=N)=N)C	J. Am. Chem. Soc. 2013 135 (35) 12940â€“12943"	COMPLEMENTARY	AuSphericalDoubleMonomerPDT/DMB	Gram-SYS
82	0	0	0.0355503	0	0.5	0	0.267024	Au	MBC (uM)	324.928	Staphylococcus aureus	ATCC6538P	Spherical	4	PDT/DMB	Double	Monomer	16	MT	Gram-	RES	0	1	0	0	t	0.447154	-0.009	-0.01	0.0993988	0.0302842	0.0319897	-0.144067	-0.119627	-0.149464	-0.118638	-0.000709045	-0.000709045	196.967	10.2	2.54	6.1	2.5	24	SC1=NC(N)=CC(N)=N1.CN(C(NC(N)=N)=N)C	J. Am. Chem. Soc. 2013 135 (35) 12940â€“12943"	COMPLEMENTARY	AuSphericalDoubleMonomerPDT/DMB	Gram-RES
82	0	0	0.124598	0	0.5	0	0.270242	Au	MBC (uM)	324.928	Staphylococcus aureus	ATCC6538P	Spherical	4	PDT/DMB	Double	Monomer	25	TY	Gram+	SYS	0	1	0	0	t	0.447154	-0.0005	-0.0005	0.10259	0.0124517	0.0135345	-0.144067	-0.119627	-0.149464	-0.118638	-0.000709045	-0.000709045	196.967	10.2	2.54	6.1	2.5	24	SC1=NC(N)=CC(N)=N1.CN(C(NC(N)=N)=N)C	J. Am. Chem. Soc. 2013 135 (35) 12940â€“12943"	COMPLEMENTARY	AuSphericalDoubleMonomerPDT/DMB	Gram+SYS
82	0	0	5.57138e-10	0	0.5	0	0.266146	Au	MBC (uM)	324.928	Staphylococcus aureus	ATCC6538P	Spherical	4	PDT/DMB	Double	Monomer	24	ST	Gram+	RES	0	1	0	0	t	0.447154	0.00133333	0.00233333	0.124568	0.0735856	0.0748657	-0.144067	-0.119627	-0.149464	-0.118638	-0.000709045	-0.000709045	196.967	10.2	2.54	6.1	2.5	24	SC1=NC(N)=CC(N)=N1.CN(C(NC(N)=N)=N)C	J. Am. Chem. Soc. 2013 135 (35) 12940â€“12943"	COMPLEMENTARY	AuSphericalDoubleMonomerPDT/DMB	Gram+RES
82	0	0	0.00936275	0	0.5	0	0.26836	Au	MBC (uM)	324.928	Staphylococcus aureus	ATCC6538P	Spherical	4	PDT/DMB	Double	Monomer	10	HI	Gram-	SYS	0	1	0	0	t	0.447154	0.00357143	0.000571429	0.114325	0.0458025	0.0470383	-0.144067	-0.119627	-0.149464	-0.118638	-0.000709045	-0.000709045	196.967	10.2	2.54	6.1	2.5	24	SC1=NC(N)=CC(N)=N1.CN(C(NC(N)=N)=N)C	J. Am. Chem. Soc. 2013 135 (35) 12940â€“12943"	COMPLEMENTARY	AuSphericalDoubleMonomerPDT/DMB	Gram-SYS
82	0	0	1.50848e-11	0	0.5	0	0.265111	Au	MBC (uM)	324.928	Staphylococcus aureus	ATCC6538P	Spherical	4	PDT/DMB	Double	Monomer	4	CJ	Gram-	GIT	0	1	0	0	t	0.447154	-0.002	0	0.122397	0.0791961	0.0807547	-0.144067	-0.119627	-0.149464	-0.118638	-0.000709045	-0.000709045	196.967	10.2	2.54	6.1	2.5	24	SC1=NC(N)=CC(N)=N1.CN(C(NC(N)=N)=N)C	J. Am. Chem. Soc. 2013 135 (35) 12940â€“12943"	COMPLEMENTARY	AuSphericalDoubleMonomerPDT/DMB	Gram-GIT
83	0	0	2.5075e-11	0	0.5	0	0.265129	Au	MBC (uM)	324.928	Staphylococcus epidermidis	ATCC12228	Spherical	4	PDT/DMB	Double	Monomer	4	CJ	Gram-	GIT	0	1	0	0	t	0.447154	-0.002	0	0.122397	0.0791961	0.0807547	-0.142944	-0.119615	-0.149459	-0.118648	-0.00074392	-0.00074392	196.967	10.2	2.54	6.1	2.5	24	SC1=NC(N)=CC(N)=N1.CN(C(NC(N)=N)=N)C	J. Am. Chem. Soc. 2013 135 (35) 12940â€“12943"	COMPLEMENTARY	AuSphericalDoubleMonomerPDT/DMB	Gram-GIT
83	0	0	8.75842e-15	0	0.5	0	0.263725	Au	MBC (uM)	324.928	Staphylococcus epidermidis	ATCC12228	Spherical	4	PDT/DMB	Double	Monomer	6	CT	Gram-	SYS	0	1	0	0	t	0.447154	0.00457143	0.00557143	0.129748	0.11685	0.11775	-0.142944	-0.119615	-0.149459	-0.118648	-0.00074392	-0.00074392	196.967	10.2	2.54	6.1	2.5	24	SC1=NC(N)=CC(N)=N1.CN(C(NC(N)=N)=N)C	J. Am. Chem. Soc. 2013 135 (35) 12940â€“12943"	COMPLEMENTARY	AuSphericalDoubleMonomerPDT/DMB	Gram-SYS
83	0	0	0.191328	0	0.5	0	0.27026	Au	MBC (uM)	324.928	Staphylococcus epidermidis	ATCC12228	Spherical	4	PDT/DMB	Double	Monomer	25	TY	Gram+	SYS	0	1	0	0	t	0.447154	-0.0005	-0.0005	0.10259	0.0124517	0.0135345	-0.142944	-0.119615	-0.149459	-0.118648	-0.00074392	-0.00074392	196.967	10.2	2.54	6.1	2.5	24	SC1=NC(N)=CC(N)=N1.CN(C(NC(N)=N)=N)C	J. Am. Chem. Soc. 2013 135 (35) 12940â€“12943"	COMPLEMENTARY	AuSphericalDoubleMonomerPDT/DMB	Gram+SYS
83	0	0	9.26115e-10	0	0.5	0	0.266164	Au	MBC (uM)	324.928	Staphylococcus epidermidis	ATCC12228	Spherical	4	PDT/DMB	Double	Monomer	24	ST	Gram+	RES	0	1	0	0	t	0.447154	0.00133333	0.00233333	0.124568	0.0735856	0.0748657	-0.142944	-0.119615	-0.149459	-0.118648	-0.00074392	-0.00074392	196.967	10.2	2.54	6.1	2.5	24	SC1=NC(N)=CC(N)=N1.CN(C(NC(N)=N)=N)C	J. Am. Chem. Soc. 2013 135 (35) 12940â€“12943"	COMPLEMENTARY	AuSphericalDoubleMonomerPDT/DMB	Gram+RES
83	0	0	0.057735	0	0.5	0	0.267042	Au	MBC (uM)	324.928	Staphylococcus epidermidis	ATCC12228	Spherical	4	PDT/DMB	Double	Monomer	16	MT	Gram-	RES	0	1	0	0	t	0.447154	-0.009	-0.01	0.0993988	0.0302842	0.0319897	-0.142944	-0.119615	-0.149459	-0.118648	-0.00074392	-0.00074392	196.967	10.2	2.54	6.1	2.5	24	SC1=NC(N)=CC(N)=N1.CN(C(NC(N)=N)=N)C	J. Am. Chem. Soc. 2013 135 (35) 12940â€“12943"	COMPLEMENTARY	AuSphericalDoubleMonomerPDT/DMB	Gram-RES
83	0	0	0.0154675	0	0.5	0	0.268378	Au	MBC (uM)	324.928	Staphylococcus epidermidis	ATCC12228	Spherical	4	PDT/DMB	Double	Monomer	10	HI	Gram-	SYS	0	1	0	0	t	0.447154	0.00357143	0.000571429	0.114325	0.0458025	0.0470383	-0.142944	-0.119615	-0.149459	-0.118648	-0.00074392	-0.00074392	196.967	10.2	2.54	6.1	2.5	24	SC1=NC(N)=CC(N)=N1.CN(C(NC(N)=N)=N)C	J. Am. Chem. Soc. 2013 135 (35) 12940â€“12943"	COMPLEMENTARY	AuSphericalDoubleMonomerPDT/DMB	Gram-SYS
83	0	0	1.87943e-11	0	0.5	0	0.265217	Au	MBC (uM)	324.928	Staphylococcus epidermidis	ATCC12228	Spherical	4	PDT/DMB	Double	Monomer	9	EF	Gram+	GIT	0	1	0	0	t	0.447154	-0.004	-0.001	0.122096	0.0733832	0.0748523	-0.142944	-0.119615	-0.149459	-0.118648	-0.00074392	-0.00074392	196.967	10.2	2.54	6.1	2.5	24	SC1=NC(N)=CC(N)=N1.CN(C(NC(N)=N)=N)C	J. Am. Chem. Soc. 2013 135 (35) 12940â€“12943"	COMPLEMENTARY	AuSphericalDoubleMonomerPDT/DMB	Gram+GIT
84	0	0	0.130173	0	0.5	0	0.270242	Au	MBC (uM)	324.928	Staphylococcus aureus	MET-R	Spherical	4	PDT/DMB	Double	Monomer	25	TY	Gram+	SYS	0	1	0	0	t	0.447154	-0.0005	-0.0005	0.10259	0.0124517	0.0135345	-0.144019	-0.119614	-0.149465	-0.118631	-0.000401112	-0.000401112	196.967	10.2	2.54	6.1	2.5	24	SC1=NC(N)=CC(N)=N1.CN(C(NC(N)=N)=N)C	J. Am. Chem. Soc. 2013 135 (35) 12940â€“12943"	COMPLEMENTARY	AuSphericalDoubleMonomerPDT/DMB	Gram+SYS
84	0	0	0.0373109	0	0.5	0	0.267024	Au	MBC (uM)	324.928	Staphylococcus aureus	MET-R	Spherical	4	PDT/DMB	Double	Monomer	16	MT	Gram-	RES	0	1	0	0	t	0.447154	-0.009	-0.01	0.0993988	0.0302842	0.0319897	-0.144019	-0.119614	-0.149465	-0.118631	-0.000401112	-0.000401112	196.967	10.2	2.54	6.1	2.5	24	SC1=NC(N)=CC(N)=N1.CN(C(NC(N)=N)=N)C	J. Am. Chem. Soc. 2013 135 (35) 12940â€“12943"	COMPLEMENTARY	AuSphericalDoubleMonomerPDT/DMB	Gram-RES
84	0	0	1.58608e-11	0	0.5	0	0.265111	Au	MBC (uM)	324.928	Staphylococcus aureus	MET-R	Spherical	4	PDT/DMB	Double	Monomer	4	CJ	Gram-	GIT	0	1	0	0	t	0.447154	-0.002	0	0.122397	0.0791961	0.0807547	-0.144019	-0.119614	-0.149465	-0.118631	-0.000401112	-0.000401112	196.967	10.2	2.54	6.1	2.5	24	SC1=NC(N)=CC(N)=N1.CN(C(NC(N)=N)=N)C	J. Am. Chem. Soc. 2013 135 (35) 12940â€“12943"	COMPLEMENTARY	AuSphericalDoubleMonomerPDT/DMB	Gram-GIT
84	0	0	0.130173	0	0.5	0	0.270242	Au	MBC (uM)	324.928	Staphylococcus aureus	MET-R	Spherical	4	PDT/DMB	Double	Monomer	25	TY	Gram+	SYS	0	1	0	0	t	0.447154	-0.0005	-0.0005	0.10259	0.0124517	0.0135345	-0.144019	-0.119614	-0.149465	-0.118631	-0.000401112	-0.000401112	196.967	10.2	2.54	6.1	2.5	24	SC1=NC(N)=CC(N)=N1.CN(C(NC(N)=N)=N)C	J. Am. Chem. Soc. 2013 135 (35) 12940â€“12943"	COMPLEMENTARY	AuSphericalDoubleMonomerPDT/DMB	Gram+SYS
84	0	0	5.858e-10	0	0.5	0	0.266146	Au	MBC (uM)	324.928	Staphylococcus aureus	MET-R	Spherical	4	PDT/DMB	Double	Monomer	24	ST	Gram+	RES	0	1	0	0	t	0.447154	0.00133333	0.00233333	0.124568	0.0735856	0.0748657	-0.144019	-0.119614	-0.149465	-0.118631	-0.000401112	-0.000401112	196.967	10.2	2.54	6.1	2.5	24	SC1=NC(N)=CC(N)=N1.CN(C(NC(N)=N)=N)C	J. Am. Chem. Soc. 2013 135 (35) 12940â€“12943"	COMPLEMENTARY	AuSphericalDoubleMonomerPDT/DMB	Gram+RES
84	0	0	0.00983967	0	0.5	0	0.26836	Au	MBC (uM)	324.928	Staphylococcus aureus	MET-R	Spherical	4	PDT/DMB	Double	Monomer	10	HI	Gram-	SYS	0	1	0	0	t	0.447154	0.00357143	0.000571429	0.114325	0.0458025	0.0470383	-0.144019	-0.119614	-0.149465	-0.118631	-0.000401112	-0.000401112	196.967	10.2	2.54	6.1	2.5	24	SC1=NC(N)=CC(N)=N1.CN(C(NC(N)=N)=N)C	J. Am. Chem. Soc. 2013 135 (35) 12940â€“12943"	COMPLEMENTARY	AuSphericalDoubleMonomerPDT/DMB	Gram-SYS
84	0	0	1.1888e-11	0	0.5	0	0.265199	Au	MBC (uM)	324.928	Staphylococcus aureus	MET-R	Spherical	4	PDT/DMB	Double	Monomer	9	EF	Gram+	GIT	0	1	0	0	t	0.447154	-0.004	-0.001	0.122096	0.0733832	0.0748523	-0.144019	-0.119614	-0.149465	-0.118631	-0.000401112	-0.000401112	196.967	10.2	2.54	6.1	2.5	24	SC1=NC(N)=CC(N)=N1.CN(C(NC(N)=N)=N)C	J. Am. Chem. Soc. 2013 135 (35) 12940â€“12943"	COMPLEMENTARY	AuSphericalDoubleMonomerPDT/DMB	Gram+GIT
84	0	0	5.54e-15	0	0.5	0	0.263708	Au	MBC (uM)	324.928	Staphylococcus aureus	MET-R	Spherical	4	PDT/DMB	Double	Monomer	6	CT	Gram-	SYS	0	1	0	0	t	0.447154	0.00457143	0.00557143	0.129748	0.11685	0.11775	-0.144019	-0.119614	-0.149465	-0.118631	-0.000401112	-0.000401112	196.967	10.2	2.54	6.1	2.5	24	SC1=NC(N)=CC(N)=N1.CN(C(NC(N)=N)=N)C	J. Am. Chem. Soc. 2013 135 (35) 12940â€“12943"	COMPLEMENTARY	AuSphericalDoubleMonomerPDT/DMB	Gram-SYS
85	0	0	1.87943e-11	0	0.5	0	0.265217	Au	MBC (uM)	324.928	Enterococcus faecium	MDR	Spherical	4	PDT/DMB	Double	Monomer	9	EF	Gram+	GIT	0	1	0	0	t	0.447154	-0.004	-0.001	0.122096	0.0733832	0.0748523	-0.142944	-0.119615	-0.149459	-0.118648	-0.00074392	-0.00074392	196.967	10.2	2.54	6.1	2.5	24	SC1=NC(N)=CC(N)=N1.CN(C(NC(N)=N)=N)C	J. Am. Chem. Soc. 2013 135 (35) 12940â€“12943"	COMPLEMENTARY	AuSphericalDoubleMonomerPDT/DMB	Gram+GIT
85	0	0	9.26115e-10	0	0.5	0	0.266164	Au	MBC (uM)	324.928	Enterococcus faecium	MDR	Spherical	4	PDT/DMB	Double	Monomer	24	ST	Gram+	RES	0	1	0	0	t	0.447154	0.00133333	0.00233333	0.124568	0.0735856	0.0748657	-0.142944	-0.119615	-0.149459	-0.118648	-0.00074392	-0.00074392	196.967	10.2	2.54	6.1	2.5	24	SC1=NC(N)=CC(N)=N1.CN(C(NC(N)=N)=N)C	J. Am. Chem. Soc. 2013 135 (35) 12940â€“12943"	COMPLEMENTARY	AuSphericalDoubleMonomerPDT/DMB	Gram+RES
85	0	0	2.5075e-11	0	0.5	0	0.265129	Au	MBC (uM)	324.928	Enterococcus faecium	MDR	Spherical	4	PDT/DMB	Double	Monomer	4	CJ	Gram-	GIT	0	1	0	0	t	0.447154	-0.002	0	0.122397	0.0791961	0.0807547	-0.142944	-0.119615	-0.149459	-0.118648	-0.00074392	-0.00074392	196.967	10.2	2.54	6.1	2.5	24	SC1=NC(N)=CC(N)=N1.CN(C(NC(N)=N)=N)C	J. Am. Chem. Soc. 2013 135 (35) 12940â€“12943"	COMPLEMENTARY	AuSphericalDoubleMonomerPDT/DMB	Gram-GIT
85	0	0	0.0154675	0	0.5	0	0.268378	Au	MBC (uM)	324.928	Enterococcus faecium	MDR	Spherical	4	PDT/DMB	Double	Monomer	10	HI	Gram-	SYS	0	1	0	0	t	0.447154	0.00357143	0.000571429	0.114325	0.0458025	0.0470383	-0.142944	-0.119615	-0.149459	-0.118648	-0.00074392	-0.00074392	196.967	10.2	2.54	6.1	2.5	24	SC1=NC(N)=CC(N)=N1.CN(C(NC(N)=N)=N)C	J. Am. Chem. Soc. 2013 135 (35) 12940â€“12943"	COMPLEMENTARY	AuSphericalDoubleMonomerPDT/DMB	Gram-SYS
85	0	0	0.057735	0	0.5	0	0.267042	Au	MBC (uM)	324.928	Enterococcus faecium	MDR	Spherical	4	PDT/DMB	Double	Monomer	16	MT	Gram-	RES	0	1	0	0	t	0.447154	-0.009	-0.01	0.0993988	0.0302842	0.0319897	-0.142944	-0.119615	-0.149459	-0.118648	-0.00074392	-0.00074392	196.967	10.2	2.54	6.1	2.5	24	SC1=NC(N)=CC(N)=N1.CN(C(NC(N)=N)=N)C	J. Am. Chem. Soc. 2013 135 (35) 12940â€“12943"	COMPLEMENTARY	AuSphericalDoubleMonomerPDT/DMB	Gram-RES
85	0	0	0.191328	0	0.5	0	0.27026	Au	MBC (uM)	324.928	Enterococcus faecium	MDR	Spherical	4	PDT/DMB	Double	Monomer	25	TY	Gram+	SYS	0	1	0	0	t	0.447154	-0.0005	-0.0005	0.10259	0.0124517	0.0135345	-0.142944	-0.119615	-0.149459	-0.118648	-0.00074392	-0.00074392	196.967	10.2	2.54	6.1	2.5	24	SC1=NC(N)=CC(N)=N1.CN(C(NC(N)=N)=N)C	J. Am. Chem. Soc. 2013 135 (35) 12940â€“12943"	COMPLEMENTARY	AuSphericalDoubleMonomerPDT/DMB	Gram+SYS
86	0	0	0.149426	0	0.5	0	0.270513	Au	MBC (uM)	324.928	Staphylococcus aureus	ATCC6538P	Spherical	5	PDT/CPB	Double	Monomer	25	TY	Gram+	SYS	0	1	0	0	t	0.447154	-0.0005	-0.0005	0.10259	0.0124517	0.0135345	-0.144067	-0.119627	-0.149464	-0.109216	-0.000709045	-0.000709045	196.967	10.2	2.54	6.1	2.2	24	SC1=NC(N)=CC(N)=N1.N=C(NC(N)=N)NC1=CC(Cl)=CC=C1	J. Am. Chem. Soc. 2013 135 (35) 12940â€“12943"	COMPLEMENTARY	AuSphericalDoubleMonomerPDT/CPB	Gram+SYS
86	0	0	0.0435162	0	0.5	0	0.267292	Au	MBC (uM)	324.928	Staphylococcus aureus	ATCC6538P	Spherical	5	PDT/CPB	Double	Monomer	16	MT	Gram-	RES	0	1	0	0	t	0.447154	-0.009	-0.01	0.0993988	0.0302842	0.0319897	-0.144067	-0.119627	-0.149464	-0.109216	-0.000709045	-0.000709045	196.967	10.2	2.54	6.1	2.2	24	SC1=NC(N)=CC(N)=N1.N=C(NC(N)=N)NC1=CC(Cl)=CC=C1	J. Am. Chem. Soc. 2013 135 (35) 12940â€“12943"	COMPLEMENTARY	AuSphericalDoubleMonomerPDT/CPB	Gram-RES
86	0	0	0.149426	0	0.5	0	0.270513	Au	MBC (uM)	324.928	Staphylococcus aureus	ATCC6538P	Spherical	5	PDT/CPB	Double	Monomer	25	TY	Gram+	SYS	0	1	0	0	t	0.447154	-0.0005	-0.0005	0.10259	0.0124517	0.0135345	-0.144067	-0.119627	-0.149464	-0.109216	-0.000709045	-0.000709045	196.967	10.2	2.54	6.1	2.2	24	SC1=NC(N)=CC(N)=N1.N=C(NC(N)=N)NC1=CC(Cl)=CC=C1	J. Am. Chem. Soc. 2013 135 (35) 12940â€“12943"	COMPLEMENTARY	AuSphericalDoubleMonomerPDT/CPB	Gram+SYS
86	0	0	0.0115309	0	0.5	0	0.268628	Au	MBC (uM)	324.928	Staphylococcus aureus	ATCC6538P	Spherical	5	PDT/CPB	Double	Monomer	10	HI	Gram-	SYS	0	1	0	0	t	0.447154	0.00357143	0.000571429	0.114325	0.0458025	0.0470383	-0.144067	-0.119627	-0.149464	-0.109216	-0.000709045	-0.000709045	196.967	10.2	2.54	6.1	2.2	24	SC1=NC(N)=CC(N)=N1.N=C(NC(N)=N)NC1=CC(Cl)=CC=C1	J. Am. Chem. Soc. 2013 135 (35) 12940â€“12943"	COMPLEMENTARY	AuSphericalDoubleMonomerPDT/CPB	Gram-SYS
86	0	0	1.39551e-11	0	0.5	0	0.265462	Au	MBC (uM)	324.928	Staphylococcus aureus	ATCC6538P	Spherical	5	PDT/CPB	Double	Monomer	9	EF	Gram+	GIT	0	1	0	0	t	0.447154	-0.004	-0.001	0.122096	0.0733832	0.0748523	-0.144067	-0.119627	-0.149464	-0.109216	-0.000709045	-0.000709045	196.967	10.2	2.54	6.1	2.2	24	SC1=NC(N)=CC(N)=N1.N=C(NC(N)=N)NC1=CC(Cl)=CC=C1	J. Am. Chem. Soc. 2013 135 (35) 12940â€“12943"	COMPLEMENTARY	AuSphericalDoubleMonomerPDT/CPB	Gram+GIT
86	0	0	1.86186e-11	0	0.5	0	0.265373	Au	MBC (uM)	324.928	Staphylococcus aureus	ATCC6538P	Spherical	5	PDT/CPB	Double	Monomer	4	CJ	Gram-	GIT	0	1	0	0	t	0.447154	-0.002	0	0.122397	0.0791961	0.0807547	-0.144067	-0.119627	-0.149464	-0.109216	-0.000709045	-0.000709045	196.967	10.2	2.54	6.1	2.2	24	SC1=NC(N)=CC(N)=N1.N=C(NC(N)=N)NC1=CC(Cl)=CC=C1	J. Am. Chem. Soc. 2013 135 (35) 12940â€“12943"	COMPLEMENTARY	AuSphericalDoubleMonomerPDT/CPB	Gram-GIT
87	0	0	0.155914	0	0.5	0	0.270513	Au	MBC (uM)	324.928	Staphylococcus aureus	MET-R	Spherical	5	PDT/CPB	Double	Monomer	25	TY	Gram+	SYS	0	1	0	0	t	0.447154	-0.0005	-0.0005	0.10259	0.0124517	0.0135345	-0.144019	-0.119614	-0.149465	-0.109208	-0.000401112	-0.000401112	196.967	10.2	2.54	6.1	2.2	24	SC1=NC(N)=CC(N)=N1.N=C(NC(N)=N)NC1=CC(Cl)=CC=C1	J. Am. Chem. Soc. 2013 135 (35) 12940â€“12943"	COMPLEMENTARY	AuSphericalDoubleMonomerPDT/CPB	Gram+SYS
87	0	0	0.0456527	0	0.5	0	0.267292	Au	MBC (uM)	324.928	Staphylococcus aureus	MET-R	Spherical	5	PDT/CPB	Double	Monomer	16	MT	Gram-	RES	0	1	0	0	t	0.447154	-0.009	-0.01	0.0993988	0.0302842	0.0319897	-0.144019	-0.119614	-0.149465	-0.109208	-0.000401112	-0.000401112	196.967	10.2	2.54	6.1	2.2	24	SC1=NC(N)=CC(N)=N1.N=C(NC(N)=N)NC1=CC(Cl)=CC=C1	J. Am. Chem. Soc. 2013 135 (35) 12940â€“12943"	COMPLEMENTARY	AuSphericalDoubleMonomerPDT/CPB	Gram-RES
87	0	0	0.155914	0	0.5	0	0.270513	Au	MBC (uM)	324.928	Staphylococcus aureus	MET-R	Spherical	5	PDT/CPB	Double	Monomer	25	TY	Gram+	SYS	0	1	0	0	t	0.447154	-0.0005	-0.0005	0.10259	0.0124517	0.0135345	-0.144019	-0.119614	-0.149465	-0.109208	-0.000401112	-0.000401112	196.967	10.2	2.54	6.1	2.2	24	SC1=NC(N)=CC(N)=N1.N=C(NC(N)=N)NC1=CC(Cl)=CC=C1	J. Am. Chem. Soc. 2013 135 (35) 12940â€“12943"	COMPLEMENTARY	AuSphericalDoubleMonomerPDT/CPB	Gram+SYS
87	0	0	7.23034e-10	0	0.5	0	0.26641	Au	MBC (uM)	324.928	Staphylococcus aureus	MET-R	Spherical	5	PDT/CPB	Double	Monomer	24	ST	Gram+	RES	0	1	0	0	t	0.447154	0.00133333	0.00233333	0.124568	0.0735856	0.0748657	-0.144019	-0.119614	-0.149465	-0.109208	-0.000401112	-0.000401112	196.967	10.2	2.54	6.1	2.2	24	SC1=NC(N)=CC(N)=N1.N=C(NC(N)=N)NC1=CC(Cl)=CC=C1	J. Am. Chem. Soc. 2013 135 (35) 12940â€“12943"	COMPLEMENTARY	AuSphericalDoubleMonomerPDT/CPB	Gram+RES
87	0	0	1.95765e-11	0	0.5	0	0.265373	Au	MBC (uM)	324.928	Staphylococcus aureus	MET-R	Spherical	5	PDT/CPB	Double	Monomer	4	CJ	Gram-	GIT	0	1	0	0	t	0.447154	-0.002	0	0.122397	0.0791961	0.0807547	-0.144019	-0.119614	-0.149465	-0.109208	-0.000401112	-0.000401112	196.967	10.2	2.54	6.1	2.2	24	SC1=NC(N)=CC(N)=N1.N=C(NC(N)=N)NC1=CC(Cl)=CC=C1	J. Am. Chem. Soc. 2013 135 (35) 12940â€“12943"	COMPLEMENTARY	AuSphericalDoubleMonomerPDT/CPB	Gram-GIT
87	0	0	1.4673e-11	0	0.5	0	0.265462	Au	MBC (uM)	324.928	Staphylococcus aureus	MET-R	Spherical	5	PDT/CPB	Double	Monomer	9	EF	Gram+	GIT	0	1	0	0	t	0.447154	-0.004	-0.001	0.122096	0.0733832	0.0748523	-0.144019	-0.119614	-0.149465	-0.109208	-0.000401112	-0.000401112	196.967	10.2	2.54	6.1	2.2	24	SC1=NC(N)=CC(N)=N1.N=C(NC(N)=N)NC1=CC(Cl)=CC=C1	J. Am. Chem. Soc. 2013 135 (35) 12940â€“12943"	COMPLEMENTARY	AuSphericalDoubleMonomerPDT/CPB	Gram+GIT
87	0	0	0.0121169	0	0.5	0	0.268628	Au	MBC (uM)	324.928	Staphylococcus aureus	MET-R	Spherical	5	PDT/CPB	Double	Monomer	10	HI	Gram-	SYS	0	1	0	0	t	0.447154	0.00357143	0.000571429	0.114325	0.0458025	0.0470383	-0.144019	-0.119614	-0.149465	-0.109208	-0.000401112	-0.000401112	196.967	10.2	2.54	6.1	2.2	24	SC1=NC(N)=CC(N)=N1.N=C(NC(N)=N)NC1=CC(Cl)=CC=C1	J. Am. Chem. Soc. 2013 135 (35) 12940â€“12943"	COMPLEMENTARY	AuSphericalDoubleMonomerPDT/CPB	Gram-SYS
87	0	0	6.83785e-15	0	0.5	0	0.263964	Au	MBC (uM)	324.928	Staphylococcus aureus	MET-R	Spherical	5	PDT/CPB	Double	Monomer	6	CT	Gram-	SYS	0	1	0	0	t	0.447154	0.00457143	0.00557143	0.129748	0.11685	0.11775	-0.144019	-0.119614	-0.149465	-0.109208	-0.000401112	-0.000401112	196.967	10.2	2.54	6.1	2.2	24	SC1=NC(N)=CC(N)=N1.N=C(NC(N)=N)NC1=CC(Cl)=CC=C1	J. Am. Chem. Soc. 2013 135 (35) 12940â€“12943"	COMPLEMENTARY	AuSphericalDoubleMonomerPDT/CPB	Gram-SYS
88	0	0	0.0703096	0	0.5	0	0.26731	Au	MBC (uM)	324.928	Enterococcus faecium	MDR	Spherical	5	PDT/CPB	Double	Monomer	16	MT	Gram-	RES	0	1	0	0	t	0.447154	-0.009	-0.01	0.0993988	0.0302842	0.0319897	-0.142944	-0.119615	-0.149459	-0.109226	-0.00074392	-0.00074392	196.967	10.2	2.54	6.1	2.2	24	SC1=NC(N)=CC(N)=N1.N=C(NC(N)=N)NC1=CC(Cl)=CC=C1	J. Am. Chem. Soc. 2013 135 (35) 12940â€“12943"	COMPLEMENTARY	AuSphericalDoubleMonomerPDT/CPB	Gram-RES
88	0	0	2.31972e-11	0	0.5	0	0.265479	Au	MBC (uM)	324.928	Enterococcus faecium	MDR	Spherical	5	PDT/CPB	Double	Monomer	9	EF	Gram+	GIT	0	1	0	0	t	0.447154	-0.004	-0.001	0.122096	0.0733832	0.0748523	-0.142944	-0.119615	-0.149459	-0.109226	-0.00074392	-0.00074392	196.967	10.2	2.54	6.1	2.2	24	SC1=NC(N)=CC(N)=N1.N=C(NC(N)=N)NC1=CC(Cl)=CC=C1	J. Am. Chem. Soc. 2013 135 (35) 12940â€“12943"	COMPLEMENTARY	AuSphericalDoubleMonomerPDT/CPB	Gram+GIT
88	0	0	1.14308e-09	0	0.5	0	0.266427	Au	MBC (uM)	324.928	Enterococcus faecium	MDR	Spherical	5	PDT/CPB	Double	Monomer	24	ST	Gram+	RES	0	1	0	0	t	0.447154	0.00133333	0.00233333	0.124568	0.0735856	0.0748657	-0.142944	-0.119615	-0.149459	-0.109226	-0.00074392	-0.00074392	196.967	10.2	2.54	6.1	2.2	24	SC1=NC(N)=CC(N)=N1.N=C(NC(N)=N)NC1=CC(Cl)=CC=C1	J. Am. Chem. Soc. 2013 135 (35) 12940â€“12943"	COMPLEMENTARY	AuSphericalDoubleMonomerPDT/CPB	Gram+RES
88	0	0	1.08102e-14	0	0.5	0	0.263982	Au	MBC (uM)	324.928	Enterococcus faecium	MDR	Spherical	5	PDT/CPB	Double	Monomer	6	CT	Gram-	SYS	0	1	0	0	t	0.447154	0.00457143	0.00557143	0.129748	0.11685	0.11775	-0.142944	-0.119615	-0.149459	-0.109226	-0.00074392	-0.00074392	196.967	10.2	2.54	6.1	2.2	24	SC1=NC(N)=CC(N)=N1.N=C(NC(N)=N)NC1=CC(Cl)=CC=C1	J. Am. Chem. Soc. 2013 135 (35) 12940â€“12943"	COMPLEMENTARY	AuSphericalDoubleMonomerPDT/CPB	Gram-SYS
88	0	0	0.0190222	0	0.5	0	0.268646	Au	MBC (uM)	324.928	Enterococcus faecium	MDR	Spherical	5	PDT/CPB	Double	Monomer	10	HI	Gram-	SYS	0	1	0	0	t	0.447154	0.00357143	0.000571429	0.114325	0.0458025	0.0470383	-0.142944	-0.119615	-0.149459	-0.109226	-0.00074392	-0.00074392	196.967	10.2	2.54	6.1	2.2	24	SC1=NC(N)=CC(N)=N1.N=C(NC(N)=N)NC1=CC(Cl)=CC=C1	J. Am. Chem. Soc. 2013 135 (35) 12940â€“12943"	COMPLEMENTARY	AuSphericalDoubleMonomerPDT/CPB	Gram-SYS
88	0	0	0.226019	0	0.5	0	0.270531	Au	MBC (uM)	324.928	Enterococcus faecium	MDR	Spherical	5	PDT/CPB	Double	Monomer	25	TY	Gram+	SYS	0	1	0	0	t	0.447154	-0.0005	-0.0005	0.10259	0.0124517	0.0135345	-0.142944	-0.119615	-0.149459	-0.109226	-0.00074392	-0.00074392	196.967	10.2	2.54	6.1	2.2	24	SC1=NC(N)=CC(N)=N1.N=C(NC(N)=N)NC1=CC(Cl)=CC=C1	J. Am. Chem. Soc. 2013 135 (35) 12940â€“12943"	COMPLEMENTARY	AuSphericalDoubleMonomerPDT/CPB	Gram+SYS
88	0	0	3.09492e-11	0	0.5	0	0.265391	Au	MBC (uM)	324.928	Enterococcus faecium	MDR	Spherical	5	PDT/CPB	Double	Monomer	4	CJ	Gram-	GIT	0	1	0	0	t	0.447154	-0.002	0	0.122397	0.0791961	0.0807547	-0.142944	-0.119615	-0.149459	-0.109226	-0.00074392	-0.00074392	196.967	10.2	2.54	6.1	2.2	24	SC1=NC(N)=CC(N)=N1.N=C(NC(N)=N)NC1=CC(Cl)=CC=C1	J. Am. Chem. Soc. 2013 135 (35) 12940â€“12943"	COMPLEMENTARY	AuSphericalDoubleMonomerPDT/CPB	Gram-GIT
89	0	0	0.0510137	0	0.5	0	0.267505	Au	MBC (uM)	324.928	Staphylococcus aureus	ATCC6538P	Spherical	6	PDT/G	Double	Monomer	16	MT	Gram-	RES	0	1	0	0	t	0.447154	-0.009	-0.01	0.0993988	0.0302842	0.0319897	-0.144067	-0.119627	-0.149464	-0.101747	-0.000709045	-0.000709045	196.967	10.2	2.54	6.1	2	24	SC1=NC(N)=CC(N)=N1.NC(N)=N	J. Am. Chem. Soc. 2013 135 (35) 12940â€“12943"	COMPLEMENTARY	AuSphericalDoubleMonomerPDT/G	Gram-RES
89	0	0	2.19989e-11	0	0.5	0	0.265581	Au	MBC (uM)	324.928	Staphylococcus aureus	ATCC6538P	Spherical	6	PDT/G	Double	Monomer	4	CJ	Gram-	GIT	0	1	0	0	t	0.447154	-0.002	0	0.122397	0.0791961	0.0807547	-0.144067	-0.119627	-0.149464	-0.101747	-0.000709045	-0.000709045	196.967	10.2	2.54	6.1	2	24	SC1=NC(N)=CC(N)=N1.NC(N)=N	J. Am. Chem. Soc. 2013 135 (35) 12940â€“12943"	COMPLEMENTARY	AuSphericalDoubleMonomerPDT/G	Gram-GIT
89	0	0	0.171891	0	0.5	0	0.270729	Au	MBC (uM)	324.928	Staphylococcus aureus	ATCC6538P	Spherical	6	PDT/G	Double	Monomer	25	TY	Gram+	SYS	0	1	0	0	t	0.447154	-0.0005	-0.0005	0.10259	0.0124517	0.0135345	-0.144067	-0.119627	-0.149464	-0.101747	-0.000709045	-0.000709045	196.967	10.2	2.54	6.1	2	24	SC1=NC(N)=CC(N)=N1.NC(N)=N	J. Am. Chem. Soc. 2013 135 (35) 12940â€“12943"	COMPLEMENTARY	AuSphericalDoubleMonomerPDT/G	Gram+SYS
89	0	0	7.68399e-15	0	0.5	0	0.264168	Au	MBC (uM)	324.928	Staphylococcus aureus	ATCC6538P	Spherical	6	PDT/G	Double	Monomer	6	CT	Gram-	SYS	0	1	0	0	t	0.447154	0.00457143	0.00557143	0.129748	0.11685	0.11775	-0.144067	-0.119627	-0.149464	-0.101747	-0.000709045	-0.000709045	196.967	10.2	2.54	6.1	2	24	SC1=NC(N)=CC(N)=N1.NC(N)=N	J. Am. Chem. Soc. 2013 135 (35) 12940â€“12943"	COMPLEMENTARY	AuSphericalDoubleMonomerPDT/G	Gram-SYS
89	0	0	0.0135959	0	0.5	0	0.26884	Au	MBC (uM)	324.928	Staphylococcus aureus	ATCC6538P	Spherical	6	PDT/G	Double	Monomer	10	HI	Gram-	SYS	0	1	0	0	t	0.447154	0.00357143	0.000571429	0.114325	0.0458025	0.0470383	-0.144067	-0.119627	-0.149464	-0.101747	-0.000709045	-0.000709045	196.967	10.2	2.54	6.1	2	24	SC1=NC(N)=CC(N)=N1.NC(N)=N	J. Am. Chem. Soc. 2013 135 (35) 12940â€“12943"	COMPLEMENTARY	AuSphericalDoubleMonomerPDT/G	Gram-SYS
90	0	0	0.0534977	0	0.5	0	0.267505	Au	MBC (uM)	324.928	Staphylococcus aureus	MET-R	Spherical	6	PDT/G	Double	Monomer	16	MT	Gram-	RES	0	1	0	0	t	0.447154	-0.009	-0.01	0.0993988	0.0302842	0.0319897	-0.144019	-0.119614	-0.149465	-0.10174	-0.000401112	-0.000401112	196.967	10.2	2.54	6.1	2	24	SC1=NC(N)=CC(N)=N1.NC(N)=N	J. Am. Chem. Soc. 2013 135 (35) 12940â€“12943"	COMPLEMENTARY	AuSphericalDoubleMonomerPDT/G	Gram-RES
90	0	0	0.17915	0	0.5	0	0.270729	Au	MBC (uM)	324.928	Staphylococcus aureus	MET-R	Spherical	6	PDT/G	Double	Monomer	25	TY	Gram+	SYS	0	1	0	0	t	0.447154	-0.0005	-0.0005	0.10259	0.0124517	0.0135345	-0.144019	-0.119614	-0.149465	-0.10174	-0.000401112	-0.000401112	196.967	10.2	2.54	6.1	2	24	SC1=NC(N)=CC(N)=N1.NC(N)=N	J. Am. Chem. Soc. 2013 135 (35) 12940â€“12943"	COMPLEMENTARY	AuSphericalDoubleMonomerPDT/G	Gram+SYS
90	0	0	0.0142853	0	0.5	0	0.26884	Au	MBC (uM)	324.928	Staphylococcus aureus	MET-R	Spherical	6	PDT/G	Double	Monomer	10	HI	Gram-	SYS	0	1	0	0	t	0.447154	0.00357143	0.000571429	0.114325	0.0458025	0.0470383	-0.144019	-0.119614	-0.149465	-0.10174	-0.000401112	-0.000401112	196.967	10.2	2.54	6.1	2	24	SC1=NC(N)=CC(N)=N1.NC(N)=N	J. Am. Chem. Soc. 2013 135 (35) 12940â€“12943"	COMPLEMENTARY	AuSphericalDoubleMonomerPDT/G	Gram-SYS
90	0	0	1.73369e-11	0	0.5	0	0.26567	Au	MBC (uM)	324.928	Staphylococcus aureus	MET-R	Spherical	6	PDT/G	Double	Monomer	9	EF	Gram+	GIT	0	1	0	0	t	0.447154	-0.004	-0.001	0.122096	0.0733832	0.0748523	-0.144019	-0.119614	-0.149465	-0.10174	-0.000401112	-0.000401112	196.967	10.2	2.54	6.1	2	24	SC1=NC(N)=CC(N)=N1.NC(N)=N	J. Am. Chem. Soc. 2013 135 (35) 12940â€“12943"	COMPLEMENTARY	AuSphericalDoubleMonomerPDT/G	Gram+GIT
90	0	0	2.31306e-11	0	0.5	0	0.265581	Au	MBC (uM)	324.928	Staphylococcus aureus	MET-R	Spherical	6	PDT/G	Double	Monomer	4	CJ	Gram-	GIT	0	1	0	0	t	0.447154	-0.002	0	0.122397	0.0791961	0.0807547	-0.144019	-0.119614	-0.149465	-0.10174	-0.000401112	-0.000401112	196.967	10.2	2.54	6.1	2	24	SC1=NC(N)=CC(N)=N1.NC(N)=N	J. Am. Chem. Soc. 2013 135 (35) 12940â€“12943"	COMPLEMENTARY	AuSphericalDoubleMonomerPDT/G	Gram-GIT
90	0	0	8.07928e-15	0	0.5	0	0.264168	Au	MBC (uM)	324.928	Staphylococcus aureus	MET-R	Spherical	6	PDT/G	Double	Monomer	6	CT	Gram-	SYS	0	1	0	0	t	0.447154	0.00457143	0.00557143	0.129748	0.11685	0.11775	-0.144019	-0.119614	-0.149465	-0.10174	-0.000401112	-0.000401112	196.967	10.2	2.54	6.1	2	24	SC1=NC(N)=CC(N)=N1.NC(N)=N	J. Am. Chem. Soc. 2013 135 (35) 12940â€“12943"	COMPLEMENTARY	AuSphericalDoubleMonomerPDT/G	Gram-SYS
91	0	0	0.0820274	0	0.5	0	0.267523	Au	MBC (uM)	324.928	Enterococcus faecium	MDR	Spherical	6	PDT/G	Double	Monomer	16	MT	Gram-	RES	0	1	0	0	t	0.447154	-0.009	-0.01	0.0993988	0.0302842	0.0319897	-0.142944	-0.119615	-0.149459	-0.101758	-0.00074392	-0.00074392	196.967	10.2	2.54	6.1	2	24	SC1=NC(N)=CC(N)=N1.NC(N)=N	J. Am. Chem. Soc. 2013 135 (35) 12940â€“12943"	COMPLEMENTARY	AuSphericalDoubleMonomerPDT/G	Gram-RES
91	0	0	1.3506e-09	0	0.5	0	0.266636	Au	MBC (uM)	324.928	Enterococcus faecium	MDR	Spherical	6	PDT/G	Double	Monomer	24	ST	Gram+	RES	0	1	0	0	t	0.447154	0.00133333	0.00233333	0.124568	0.0735856	0.0748657	-0.142944	-0.119615	-0.149459	-0.101758	-0.00074392	-0.00074392	196.967	10.2	2.54	6.1	2	24	SC1=NC(N)=CC(N)=N1.NC(N)=N	J. Am. Chem. Soc. 2013 135 (35) 12940â€“12943"	COMPLEMENTARY	AuSphericalDoubleMonomerPDT/G	Gram+RES
91	0	0	0.0223983	0	0.5	0	0.268858	Au	MBC (uM)	324.928	Enterococcus faecium	MDR	Spherical	6	PDT/G	Double	Monomer	10	HI	Gram-	SYS	0	1	0	0	t	0.447154	0.00357143	0.000571429	0.114325	0.0458025	0.0470383	-0.142944	-0.119615	-0.149459	-0.101758	-0.00074392	-0.00074392	196.967	10.2	2.54	6.1	2	24	SC1=NC(N)=CC(N)=N1.NC(N)=N	J. Am. Chem. Soc. 2013 135 (35) 12940â€“12943"	COMPLEMENTARY	AuSphericalDoubleMonomerPDT/G	Gram-SYS
91	0	0	0.256527	0	0.5	0	0.270747	Au	MBC (uM)	324.928	Enterococcus faecium	MDR	Spherical	6	PDT/G	Double	Monomer	25	TY	Gram+	SYS	0	1	0	0	t	0.447154	-0.0005	-0.0005	0.10259	0.0124517	0.0135345	-0.142944	-0.119615	-0.149459	-0.101758	-0.00074392	-0.00074392	196.967	10.2	2.54	6.1	2	24	SC1=NC(N)=CC(N)=N1.NC(N)=N	J. Am. Chem. Soc. 2013 135 (35) 12940â€“12943"	COMPLEMENTARY	AuSphericalDoubleMonomerPDT/G	Gram+SYS
91	0	0	2.74087e-11	0	0.5	0	0.265688	Au	MBC (uM)	324.928	Enterococcus faecium	MDR	Spherical	6	PDT/G	Double	Monomer	9	EF	Gram+	GIT	0	1	0	0	t	0.447154	-0.004	-0.001	0.122096	0.0733832	0.0748523	-0.142944	-0.119615	-0.149459	-0.101758	-0.00074392	-0.00074392	196.967	10.2	2.54	6.1	2	24	SC1=NC(N)=CC(N)=N1.NC(N)=N	J. Am. Chem. Soc. 2013 135 (35) 12940â€“12943"	COMPLEMENTARY	AuSphericalDoubleMonomerPDT/G	Gram+GIT
91	0	0	3.65682e-11	0	0.5	0	0.265599	Au	MBC (uM)	324.928	Enterococcus faecium	MDR	Spherical	6	PDT/G	Double	Monomer	4	CJ	Gram-	GIT	0	1	0	0	t	0.447154	-0.002	0	0.122397	0.0791961	0.0807547	-0.142944	-0.119615	-0.149459	-0.101758	-0.00074392	-0.00074392	196.967	10.2	2.54	6.1	2	24	SC1=NC(N)=CC(N)=N1.NC(N)=N	J. Am. Chem. Soc. 2013 135 (35) 12940â€“12943"	COMPLEMENTARY	AuSphericalDoubleMonomerPDT/G	Gram-GIT
92	0	0	0.183917	0	0.5	0	0.269899	CuO	MBC (uM)	352.002	Pseudomonas aeruginosa	MD	N/A	16	N/A	None	None	19	PA	Gram-	SYS	0	1	0	1	t	0.447154	0.00657143	0.00357143	0.102611	0.0205758	0.0222078	-0.147392	-0.123566	-0.140528	-0.15039	-3.11552e-05	-3.11552e-05	79.545	10.55	2.695	3.7465	22	24		Int. J. Nanomedicine 2012 7 6003-6009"	COMPLEMENTARY	CuON/ANoneNoneN/A	Gram-SYS
92	0	0	0.00422507	0	0.5	0	0.26607	CuO	MBC (uM)	352.002	Pseudomonas aeruginosa	MD	N/A	16	N/A	None	None	16	MT	Gram-	RES	0	1	0	0	t	0.447154	-0.009	-0.01	0.0993988	0.0302842	0.0319897	-0.147392	-0.123566	-0.140528	-0.15039	-3.11552e-05	-3.11552e-05	79.545	10.55	2.695	3.7465	22	24		Int. J. Nanomedicine 2012 7 6003-6009"	COMPLEMENTARY	CuON/ANoneNoneN/A	Gram-RES
92	0	0	0.183917	0	0.5	0	0.269899	CuO	MBC (uM)	352.002	Pseudomonas aeruginosa	MD	N/A	16	N/A	None	None	19	PA	Gram-	SYS	0	1	0	1	t	0.447154	0.00657143	0.00357143	0.102611	0.0205758	0.0222078	-0.147392	-0.123566	-0.140528	-0.15039	-3.11552e-05	-3.11552e-05	79.545	10.55	2.695	3.7465	22	24		Int. J. Nanomedicine 2012 7 6003-6009"	COMPLEMENTARY	CuON/ANoneNoneN/A	Gram-SYS
[truncated: 4,369 more rows]

## Sheet: PTML-LDA
	PTML-EGS STAT 8 vars																							Bact	NP
Nns	f(n,c,j,s)obs	f(n,c,j,s)pred	p(f(n,c,j,s)=1)	Set	Nn	NP_KEY	cn0 = Property	vnj	cn1 = Organism	cn2 = Strain	cn3 = Shape	Nc	COAT_KEY	cc1 = Coating mult.	cc2 = Poly.	Ns	MRNs_KEY	cs1 = Gram(+/-)	cs2 = Pathog.	Nm	Lin	Lout	ACUs	type	Type
[truncated: 5,327 more rows]

## Sheet: DATA
Nn	NP_KEY	cn0 = Property	vnj	cn1 = Organism	cn2 = Strain	cn3 = Shape	Nc	COAT_KEY	cc1 = Coating mult.	cc2 = Poly.	Ns	MRNs_KEY	cs1 = Gram(+/-)	cs2 = Pathog.	f(n,c,j,s)obs	f(s,j)obs	f(n,j,s)obs	f(n,s)obs	Set	f(vnj(cn0))ref	DSh1(MRNs)cs	DSh2(MRNs)cs	DSh3(Nm)cs	DSh4(Lins)cs	DSh5(Louts)cs	DSh1(AMVn)cn	DSh1(AEn)cn	DSh1(APn)cn	DSh1(APSn)cn	DDSh1(t,1c,2c)	DDSh2(t,1c,2c)	M(x)	AMV	AE	AP	APS	Time	SM1(Std)sc	SM2(Std)sc	SM3(Std)sc	SM4(Std)sc	SM5(Std)sc	SM1(PSA)sc	SM2(PSA)sc	SM3(PSA)sc	SM4(PSA)sc	SM5(PSA)sc	SM1(MR)sc	SM2(MR)sc
[truncated: 5,327 more rows]
[truncated: 6 more columns]

[truncated: 7 more sheets: MRN, ABNP, COAT, AVG, CUTOFF, NOTES, ACU]
